# Supplementary material
Source: publisher site journal article supplement (https://www.spandidos-publications.com/7869/downloadSupplementary)
Supplement: Supplementary file 1 [file downloadSupplementary]

## Sheet: Table IV
Table SIV. Expression levels of EFNA3 and OS events and time in samples from various types of cancer.
Sample_ID	OS event	OS time	Tumor type	EFNA3 expression levels
TCGA-02-0047-01A-01R-1849-01	Dead	448	GBM	2.32357
TCGA-02-0055-01A-01R-1849-01	Dead	76	GBM	2.11899
TCGA-02-2483-01A-01R-1849-01	Alive	466	GBM	4.48472
TCGA-02-2485-01A-01R-1849-01	Alive	470	GBM	2.08171
TCGA-02-2486-01A-01R-1849-01	Dead	618	GBM	2.11886
TCGA-04-1331-01A-01R-1569-13	Dead	1336	OV	2.80876
TCGA-04-1332-01A-01R-1564-13	Dead	1247	OV	3.18853
TCGA-04-1338-01A-01R-1564-13	Alive	1418	OV	4.04624
TCGA-04-1341-01A-01R-1564-13	Alive	33	OV	3.05395
TCGA-04-1343-01A-01R-1564-13	Dead	361	OV	3.81636
TCGA-04-1347-01A-01R-1564-13	Alive	1919	OV	6.8026
TCGA-04-1350-01A-01R-1565-13	Dead	1946	OV	3.21534
TCGA-04-1356-01A-01R-1569-13	Dead	1499	OV	3.89767
TCGA-04-1357-01A-01R-1565-13	Alive		OV	1.83005
TCGA-04-1361-01A-01R-1565-13	Alive	989	OV	3.63415
TCGA-04-1362-01A-01R-1565-13	Dead	1348	OV	2.99163
TCGA-04-1364-01A-01R-1565-13	Dead	1024	OV	5.43775
TCGA-04-1365-01A-01R-1565-13	Alive	2329	OV	3.5003
TCGA-04-1514-01A-01R-1566-13	Dead	1720	OV	5.53629
TCGA-04-1519-01A-01R-1565-13	Alive	24	OV	4.0684
TCGA-04-1530-01A-02R-1569-13	Dead	3622	OV	3.53249
TCGA-04-1536-01A-01R-1566-13	Dead	885	OV	4.24169
TCGA-04-1542-01A-01R-1566-13	Dead	2561	OV	5.46004
TCGA-04-1648-01A-01R-1567-13	Dead	871	OV	3.0237
TCGA-04-1651-01A-01R-1567-13	Dead	1102	OV	4.57247
TCGA-04-1655-01A-01R-1566-13	Dead	1380	OV	4.50576
TCGA-05-4244-01A-01R-1107-07	Alive	0	LUAD	4.42925
TCGA-05-4249-01A-01R-1107-07	Alive	1523	LUAD	2.67541
TCGA-05-4250-01A-01R-1107-07	Dead	121	LUAD	2.37317
TCGA-05-4382-01A-01R-1206-07	Alive	607	LUAD	3.90093
TCGA-05-4384-01A-01R-1755-07	Alive	426	LUAD	4.53079
TCGA-05-4389-01A-01R-1206-07	Alive	1369	LUAD	5.75931
TCGA-05-4390-01A-02R-1755-07	Alive	1126	LUAD	2.23603
TCGA-05-4395-01A-01R-1206-07	Dead	0	LUAD	2.85689
TCGA-05-4396-01A-21R-1858-07	Dead	303	LUAD	3.8908
TCGA-05-4397-01A-01R-1206-07	Dead	731	LUAD	2.62604
TCGA-05-4398-01A-01R-1206-07	Alive	1431	LUAD	3.27995
TCGA-05-4402-01A-01R-1206-07	Dead	244	LUAD	3.50414
TCGA-05-4403-01A-01R-1206-07	Alive	578	LUAD	3.0701
TCGA-05-4405-01A-21R-1858-07	Alive	610	LUAD	2.9528
TCGA-05-4410-01A-21R-1858-07	Alive	0	LUAD	2.06788
TCGA-05-4415-01A-22R-1858-07	Dead	91	LUAD	4.7223
TCGA-05-4417-01A-22R-1858-07	Alive	455	LUAD	1.38018
TCGA-05-4418-01A-01R-1206-07	Dead	274	LUAD	2.82155
TCGA-05-4420-01A-01R-1206-07	Alive	912	LUAD	2.71343
TCGA-05-4422-01A-01R-1206-07	Alive	365	LUAD	3.21818
TCGA-05-4424-01A-22R-1858-07	Alive	913	LUAD	2.24747
TCGA-05-4425-01A-01R-1755-07	Alive	669	LUAD	2.21767
TCGA-05-4426-01A-01R-1206-07	Alive	791	LUAD	3.98733
TCGA-05-4427-01A-21R-1858-07	Alive	791	LUAD	2.32993
TCGA-05-4430-01A-02R-1206-07	Alive	761	LUAD	3.1998
TCGA-05-4432-01A-01R-1206-07	Alive	761	LUAD	4.59413
TCGA-05-4433-01A-22R-1858-07	Alive	730	LUAD	1.69001
TCGA-05-4434-01A-01R-1206-07	Dead	457	LUAD	3.50251
TCGA-05-5420-01A-01R-1628-07	Alive	457	LUAD	1.46587
TCGA-05-5423-01A-01R-1628-07	Alive	151	LUAD	2.5763
TCGA-05-5425-01A-02R-1628-07	Alive	882	LUAD	3.19153
TCGA-05-5428-01A-01R-1628-07	Alive	670	LUAD	4.2092
TCGA-05-5429-01A-01R-1628-07	Dead	275	LUAD	3.33865
TCGA-05-5715-01A-01R-1628-07	Alive	62	LUAD	3.3152
TCGA-06-0125-01A-01R-1849-01	Dead	1448	GBM	2.20141
TCGA-06-0125-02A-11R-2005-01	Dead	1448	GBM	3.1176
TCGA-06-0129-01A-01R-1849-01	Dead	1024	GBM	3.20928
TCGA-06-0130-01A-01R-1849-01	Dead	394	GBM	1.30865
TCGA-06-0132-01A-02R-1849-01	Dead	771	GBM	3.1821
TCGA-06-0138-01A-02R-1849-01	Dead	737	GBM	2.57529
TCGA-06-0139-01A-01R-1849-01	Dead	362	GBM	1.77155
TCGA-06-0141-01A-01R-1849-01	Dead	313	GBM	1.6769
TCGA-06-0152-02A-01R-2005-01	Dead	375	GBM	2.49347
TCGA-06-0156-01A-02R-1849-01	Dead	178	GBM	3.0843
TCGA-06-0156-01A-03R-1849-01	Dead	178	GBM	3.28448
TCGA-06-0157-01A-01R-1849-01	Dead	97	GBM	3.18737
TCGA-06-0158-01A-01R-1849-01	Dead	329	GBM	2.56272
TCGA-06-0168-01A-01R-1849-01	Dead	598	GBM	2.82908
TCGA-06-0171-02A-11R-2005-01	Dead	399	GBM	2.014
TCGA-06-0174-01A-01R-1849-01	Dead	98	GBM	3.39932
TCGA-06-0178-01A-01R-1849-01	Dead	2681	GBM	3.53373
TCGA-06-0184-01A-01R-1849-01	Dead	2126	GBM	2.61457
TCGA-06-0187-01A-01R-1849-01	Dead	828	GBM	3.12539
TCGA-06-0190-01A-01R-1849-01	Dead	317	GBM	2.44292
TCGA-06-0190-02A-01R-2005-01	Dead	317	GBM	2.08389
TCGA-06-0210-01A-01R-1849-01	Dead	225	GBM	3.30399
TCGA-06-0210-02A-01R-2005-01	Dead	225	GBM	2.42317
TCGA-06-0211-01A-01R-1849-01	Dead	360	GBM	2.14903
TCGA-06-0211-01B-01R-1849-01	Dead	360	GBM	2.37262
TCGA-06-0211-02A-02R-2005-01	Dead	360	GBM	2.76791
TCGA-06-0219-01A-01R-1849-01	Dead	22	GBM	3.15071
TCGA-06-0221-02A-11R-2005-01	Dead	603	GBM	4.26242
TCGA-06-0238-01A-02R-1849-01	Dead	405	GBM	2.93229
TCGA-06-0644-01A-02R-1849-01	Dead	384	GBM	1.70177
TCGA-06-0645-01A-01R-1849-01	Dead	175	GBM	2.52507
TCGA-06-0646-01A-01R-1849-01	Dead	175	GBM	3.15746
TCGA-06-0649-01B-01R-1849-01	Dead	64	GBM	3.18449
TCGA-06-0686-01A-01R-1849-01	Dead	432	GBM	3.17914
TCGA-06-0743-01A-01R-1849-01	Dead	803	GBM	2.44652
TCGA-06-0744-01A-01R-1849-01	Dead	1426	GBM	2.06202
TCGA-06-0745-01A-01R-1849-01	Dead	239	GBM	3.88353
TCGA-06-0747-01A-01R-1849-01	Dead	82	GBM	2.57597
TCGA-06-0749-01A-01R-1849-01	Dead	82	GBM	3.81122
TCGA-06-0750-01A-01R-1849-01	Dead	28	GBM	2.58775
TCGA-06-0878-01A-01R-1849-01	Alive	218	GBM	2.53371
TCGA-06-0882-01A-01R-1849-01	Dead	632	GBM	3.76845
TCGA-06-1804-01A-01R-1849-01	Dead	414	GBM	4.42208
TCGA-06-2557-01A-01R-1849-01	Dead	33	GBM	3.12762
TCGA-06-2558-01A-01R-1849-01	Dead	380	GBM	3.9203
TCGA-06-2559-01A-01R-1849-01	Dead	150	GBM	3.59383
TCGA-06-2561-01A-02R-1849-01	Dead	537	GBM	2.32423
TCGA-06-2562-01A-01R-1849-01	Dead	382	GBM	3.0943
TCGA-06-2563-01A-01R-1849-01	Alive	932	GBM	1.83499
TCGA-06-2564-01A-01R-1849-01	Alive	181	GBM	2.48406
TCGA-06-2565-01A-01R-1849-01	Dead	506	GBM	3.2915
TCGA-06-2567-01A-01R-1849-01	Dead	133	GBM	3.93328
TCGA-06-2569-01A-01R-1849-01	Alive	13	GBM	5.56397
TCGA-06-2570-01A-01R-1849-01	Alive	958	GBM	3.11836
TCGA-06-5408-01A-01R-1849-01	Dead	357	GBM	3.592
TCGA-06-5410-01A-01R-1849-01	Dead	108	GBM	2.34338
TCGA-06-5411-01A-01R-1849-01	Dead	254	GBM	4.07052
TCGA-06-5412-01A-01R-1849-01	Dead	138	GBM	2.31208
TCGA-06-5413-01A-01R-1849-01	Alive	268	GBM	2.80768
TCGA-06-5414-01A-01R-1849-01	Alive	273	GBM	2.62754
TCGA-06-5416-01A-01R-1849-01	Alive	204	GBM	3.96736
TCGA-06-5417-01A-01R-1849-01	Alive	155	GBM	4.28842
TCGA-06-5418-01A-01R-1849-01	Dead	83	GBM	3.41946
TCGA-06-5856-01A-01R-1849-01	Dead	114	GBM	2.97008
TCGA-06-5858-01A-01R-1849-01	Alive	187	GBM	3.38992
TCGA-06-5859-01A-01R-1849-01	Alive	139	GBM	3.06994
TCGA-08-0386-01A-01R-1849-01	Dead	548	GBM	3.71395
TCGA-09-0364-01A-02R-1564-13	Dead	887	OV	4.61242
TCGA-09-0366-01A-01R-1564-13	Dead	1757	OV	2.95045
TCGA-09-0367-01A-01R-1564-13	Dead	547	OV	2.61756
TCGA-09-0369-01A-01R-1564-13	Dead	1082	OV	6.16851
TCGA-09-1659-01B-01R-1564-13	Dead	304	OV	2.72879
TCGA-09-1661-01B-01R-1566-13	Dead	1169	OV	3.53028
TCGA-09-1662-01A-01R-1566-13	Dead	2717	OV	2.34886
TCGA-09-1665-01B-01R-1566-13	Dead	1266	OV	4.24805
TCGA-09-1666-01A-01R-1566-13	Alive	1752	OV	1.51258
TCGA-09-1667-01C-01R-1566-13	Alive	1882	OV	4.02938
TCGA-09-1668-01B-01R-1566-13	Alive	1684	OV	2.84236
TCGA-09-1669-01A-01R-1566-13	Alive	928	OV	3.79116
TCGA-09-1670-01A-01R-1566-13	Alive	547	OV	2.1574
TCGA-09-1673-01A-01R-1566-13	Alive	92	OV	3.17656
TCGA-09-2044-01B-01R-1568-13	Alive	186	OV	2.21822
TCGA-09-2045-01A-01R-1568-13	Dead	1069	OV	3.09798
TCGA-09-2048-01A-01R-1568-13	Dead	138	OV	5.04619
TCGA-09-2051-01A-01R-1568-13	Alive	1919	OV	3.28684
TCGA-09-2053-01C-01R-1568-13	Alive	1209	OV	3.49948
TCGA-09-2054-01A-01R-1568-13	Dead	637	OV	4.91615
TCGA-09-2056-01B-01R-1568-13	Alive	379	OV	2.83005
TCGA-10-0927-01A-02R-1564-13	Dead	2490	OV	2.691
TCGA-10-0928-01A-02R-1564-13	Dead	563	OV	3.40122
TCGA-10-0931-01A-01R-1564-13	Dead	1000	OV	3.63063
TCGA-10-0933-01A-01R-1569-13	Dead	446	OV	4.33056
TCGA-10-0936-01A-01R-1564-13	Dead	1123	OV	3.5705
TCGA-10-0937-01A-02R-1564-13	Dead	608	OV	2.88035
TCGA-10-0938-01A-02R-1564-13	Dead	636	OV	3.72221
TCGA-12-0616-01A-01R-1849-01	Dead	448	GBM	1.88339
TCGA-12-0618-01A-01R-1849-01	Dead	395	GBM	4.74359
TCGA-12-0619-01A-01R-1849-01	Dead	1062	GBM	2.82055
TCGA-12-0821-01A-01R-1849-01	Dead	323	GBM	3.55318
TCGA-12-1597-01B-01R-1849-01	Dead	675	GBM	4.11584
TCGA-12-3650-01A-01R-1849-01	Dead	333	GBM	3.20549
TCGA-12-3652-01A-01R-1849-01	Dead	1062	GBM	4.25629
TCGA-12-3653-01A-01R-1849-01	Dead	442	GBM	2.15449
TCGA-12-5295-01A-01R-1849-01	Dead	454	GBM	2.90456
TCGA-12-5299-01A-02R-1849-01	Dead	98	GBM	2.9583
TCGA-13-0714-01A-01R-1564-13	Dead	189	OV	3.06755
TCGA-13-0720-01A-01R-1564-13	Dead	1355	OV	2.36432
TCGA-13-0724-01A-01R-1564-13	Dead	83	OV	4.40622
TCGA-13-0725-01A-01R-1564-13	Dead	377	OV	3.60682
TCGA-13-0726-01A-01R-1564-13	Dead	949	OV	4.05136
TCGA-13-0727-01A-01R-1564-13	Dead	462	OV	3.33745
TCGA-13-0730-01A-01R-1564-13	Dead	542	OV	4.81735
TCGA-13-0762-01A-01R-1564-13	Alive	3400	OV	6.1466
TCGA-13-0765-01A-01R-1564-13	Dead	1389	OV	3.3342
TCGA-13-0766-01A-02R-1564-13	Dead	1725	OV	3.20567
TCGA-13-0768-01A-01R-1569-13	Dead	1784	OV	3.8792
TCGA-13-0795-01A-01R-1564-13	Dead	619	OV	1.724
TCGA-13-0797-01A-01R-1564-13	Alive	2121	OV	3.86279
TCGA-13-0800-01A-01R-1564-13	Alive	2661	OV	6.18217
TCGA-13-0804-01A-01R-1564-13	Dead	1073	OV	2.32582
TCGA-13-0883-01A-02R-1569-13	Dead	2097	OV	2.57606
TCGA-13-0884-01B-01R-1565-13	Dead	3260	OV	2.20333
TCGA-13-0885-01A-02R-1569-13	Alive	3388	OV	2.65652
TCGA-13-0886-01A-01R-1569-13	Alive	4665	OV	1.6968
TCGA-13-0887-01A-01R-1564-13	Dead	2028	OV	2.11083
TCGA-13-0888-01A-01R-1564-13	Dead	2811	OV	4.47077
TCGA-13-0891-01A-01R-1564-13	Dead	3128	OV	3.26938
TCGA-13-0893-01B-01R-1565-13	Dead	1319	OV	3.28112
TCGA-13-0897-01A-01R-1564-13	Dead	2182	OV	3.39562
TCGA-13-0900-01B-01R-1565-13	Alive	4077	OV	3.51784
TCGA-13-0901-01B-01R-1565-13	Alive	589	OV	4.17952
TCGA-13-0905-01B-01R-1565-13	Alive	3746	OV	3.42449
TCGA-13-0906-01A-01R-1564-13	Alive	3619	OV	2.81246
TCGA-13-0908-01B-01R-1565-13	Dead	1843	OV	2.5807
TCGA-13-0911-01A-01R-1564-13	Dead	1355	OV	4.07838
TCGA-13-0913-02A-01R-1564-13	Alive	3325	OV	2.83078
TCGA-13-0916-01A-01R-1564-13	Alive	1785	OV	3.61967
TCGA-13-0920-01A-01R-1564-13	Dead	1484	OV	4.53289
TCGA-13-0923-01A-01R-1564-13	Alive	2547	OV	3.56433
TCGA-13-0924-01A-01R-1564-13	Alive	2614	OV	2.29231
TCGA-13-1403-01A-01R-1565-13	Dead	2345	OV	2.93478
TCGA-13-1404-01A-01R-1565-13	Alive	2469	OV	2.80496
TCGA-13-1405-01A-01R-1565-13	Dead	868	OV	2.90858
TCGA-13-1407-01A-01R-1565-13	Alive	2534	OV	4.08632
TCGA-13-1408-01A-01R-1565-13	Dead	1680	OV	3.10257
TCGA-13-1409-01A-01R-1565-13	Dead	1742	OV	4.22534
TCGA-13-1410-01A-01R-1565-13	Alive	2464	OV	1.97889
TCGA-13-1411-01A-01R-1565-13	Dead	531	OV	3.29312
TCGA-13-1477-01A-01R-1565-13	Dead	1662	OV	2.96601
TCGA-13-1483-01A-01R-1565-13	Dead	895	OV	3.63545
TCGA-13-1485-01A-02R-1565-13	Dead	629	OV	3.40863
TCGA-13-1487-01A-01R-1565-13	Dead	681	OV	4.58275
TCGA-13-1488-01A-01R-1565-13	Dead	2154	OV	3.95535
TCGA-13-1489-01A-01R-1565-13	Dead	2553	OV	4.18919
TCGA-13-1489-02A-01R-1565-13	Dead	2553	OV	4.66986
TCGA-13-1492-01A-01R-1565-13	Dead	3819	OV	3.91309
TCGA-13-1495-01A-01R-1565-13	Dead	2749	OV	3.81398
TCGA-13-1496-01A-01R-1565-13	Dead	129	OV	3.98433
TCGA-13-1497-01A-01R-1565-13	Alive	3871	OV	2.70139
TCGA-13-1498-01A-01R-1565-13	Dead	2012	OV	2.90211
TCGA-13-1499-01A-01R-1565-13	Alive	3500	OV	4.0475
TCGA-13-1501-01A-01R-1565-13	Dead	1314	OV	3.79912
TCGA-13-1505-01A-01R-1565-13	Alive	1998	OV	3.84769
TCGA-13-1506-01A-01R-1565-13	Dead	1039	OV	3.54924
TCGA-13-1507-01A-01R-1565-13	Dead	1993	OV	2.12793
TCGA-13-1509-01A-01R-1565-13	Alive	2438	OV	3.3172
TCGA-13-1510-01A-02R-1565-13	Dead	1359	OV	4.18683
TCGA-13-1511-01A-01R-1565-13	Dead	1650	OV	4.26882
TCGA-13-1512-01A-01R-1565-13	Alive	442	OV	4.50883
TCGA-13-2060-01A-01R-1568-13	Alive	2369	OV	3.97478
TCGA-13-A5FT-01A-11R-A406-31	Alive	2143	OV	4.2207
TCGA-14-0736-02A-01R-2005-01	Dead	460	GBM	3.12385
TCGA-14-0781-01B-01R-1849-01	Dead	29	GBM	2.82497
TCGA-14-0787-01A-01R-1849-01	Dead	68	GBM	3.10879
TCGA-14-0789-01A-01R-1849-01	Dead	342	GBM	3.47799
TCGA-14-0790-01B-01R-1849-01	Dead	419	GBM	2.70629
TCGA-14-0817-01A-01R-1849-01	Dead	164	GBM	2.80956
TCGA-14-0871-01A-01R-1849-01	Dead	880	GBM	4.44608
TCGA-14-1034-01A-01R-1849-01	Dead	485	GBM	2.73001
TCGA-14-1034-02B-01R-2005-01	Dead	485	GBM	2.89776
TCGA-14-1402-02A-01R-2005-01	Dead	975	GBM	2.72506
TCGA-14-1823-01A-01R-1849-01	Dead	543	GBM	2.01728
TCGA-14-1825-01A-01R-1850-01	Dead	232	GBM	2.64556
TCGA-14-1829-01A-01R-1850-01	Alive	218	GBM	2.05908
TCGA-14-2554-01A-01R-1850-01	Dead	532	GBM	2.65537
TCGA-15-0742-01A-01R-1850-01	Dead	419	GBM	2.87918
TCGA-15-1444-01A-02R-1850-01	Dead	1537	GBM	3.94296
TCGA-16-0846-01A-01R-1850-01	Dead	119	GBM	3.82261
TCGA-16-1045-01B-01R-1850-01	Dead	883	GBM	2.86019
TCGA-18-3406-01A-01R-0980-07	Dead	371	LUSC	3.94363
TCGA-18-3407-01A-01R-0980-07	Dead	136	LUSC	2.86888
TCGA-18-3408-01A-01R-0980-07	Dead	2304	LUSC	3.66611
TCGA-18-3409-01A-01R-0980-07	Alive	3747	LUSC	4.70128
TCGA-18-3410-01A-01R-0980-07	Dead	146	LUSC	1.37757
TCGA-18-3411-01A-01R-0980-07	Alive	3576	LUSC	3.0508
TCGA-18-3412-01A-01R-0980-07	Dead	345	LUSC	2.84792
TCGA-18-3414-01A-01R-0980-07	Dead	716	LUSC	4.67185
TCGA-18-3415-01A-01R-0980-07	Dead	2803	LUSC	3.12717
TCGA-18-3416-01A-01R-0980-07	Dead	973	LUSC	2.49996
TCGA-18-3417-01A-01R-1443-07	Dead	1097	LUSC	3.29483
TCGA-18-3419-01A-01R-0980-07	Alive	2811	LUSC	3.42976
TCGA-18-3421-01A-01R-0980-07	Alive	2645	LUSC	3.52787
TCGA-18-4083-01A-01R-1100-07	Dead	188	LUSC	2.85806
TCGA-18-4086-01A-01R-1100-07	Dead	85	LUSC	2.7695
TCGA-18-4721-01A-01R-1443-07	Alive	4694	LUSC	2.86764
TCGA-18-5592-01A-01R-1635-07	Alive	1519	LUSC	3.72888
TCGA-18-5595-01A-01R-1635-07	Dead	827	LUSC	3.74707
TCGA-19-0957-02A-11R-2005-01	Dead	666	GBM	2.50388
TCGA-19-1389-02A-21R-2005-01	Dead	141	GBM	1.67265
TCGA-19-1390-01A-01R-1850-01	Dead	772	GBM	2.42567
TCGA-19-1787-01B-01R-1850-01	Dead	385	GBM	1.54369
TCGA-19-2619-01A-01R-1850-01	Alive	294	GBM	2.44599
TCGA-19-2620-01A-01R-1850-01	Dead	148	GBM	2.24832
TCGA-19-2624-01A-01R-1850-01	Dead	5	GBM	3.12781
TCGA-19-2625-01A-01R-1850-01	Dead	124	GBM	3.24396
TCGA-19-2629-01A-01R-1850-01	Dead	737	GBM	3.13822
TCGA-19-4065-01A-01R-2005-01	Alive	214	GBM	2.47407
TCGA-19-4065-02A-11R-2005-01	Alive	214	GBM	2.92499
TCGA-19-5960-01A-11R-1850-01	Dead	455	GBM	4.10662
TCGA-20-0987-01A-02R-1564-13	Dead	701	OV	4.85982
TCGA-20-0991-01A-01R-1564-13	Alive	797	OV	3.64121
TCGA-20-1682-01A-01R-1564-13	Alive	837	OV	3.33683
TCGA-20-1683-01A-01R-1566-13	Alive	772	OV	3.39083
TCGA-20-1686-01A-01R-1566-13	Alive	89	OV	3.06802
TCGA-20-1687-01A-01R-1566-13	Alive	81	OV	3.61201
TCGA-21-1070-01A-01R-0692-07	Alive	3636	LUSC	3.16131
TCGA-21-1071-01A-01R-0692-07	Dead	1426	LUSC	2.22928
TCGA-21-1072-01A-01R-0692-07	Alive	3016	LUSC	3.57983
TCGA-21-1075-01A-01R-0692-07	Alive	2134	LUSC	4.59225
TCGA-21-1076-01A-01R-0692-07	Alive	1852	LUSC	3.28611
TCGA-21-1076-01A-02R-0692-07	Alive	1852	LUSC	3.15937
TCGA-21-1077-01A-01R-0692-07	Dead	1058	LUSC	2.91812
TCGA-21-1078-01A-01R-0692-07	Dead	474	LUSC	1.93353
TCGA-21-1079-01A-01R-0692-07	Dead	965	LUSC	2.82745
TCGA-21-1080-01A-01R-0692-07	Alive	3724	LUSC	3.85144
TCGA-21-1081-01A-01R-0692-07	Dead	284	LUSC	4.35796
TCGA-21-1082-01A-01R-0692-07	Alive	3644	LUSC	2.78172
TCGA-21-1083-01A-01R-0692-07	Dead	1315	LUSC	2.92497
TCGA-21-5782-01A-01R-1635-07	Dead	962	LUSC	3.80996
TCGA-21-5783-01A-41R-2187-07	Dead	2680	LUSC	4.21627
TCGA-21-5784-01A-01R-1635-07	Alive	1268	LUSC	5.07705
TCGA-21-5786-01A-01R-1635-07	Alive	1032	LUSC	3.4626
TCGA-21-5787-01A-01R-1635-07	Dead	329	LUSC	3.61732
TCGA-21-A5DI-01A-31R-A26W-07	Alive	979	LUSC	3.12456
TCGA-22-0940-01A-01R-0692-07	Dead	669	LUSC	2.27617
TCGA-22-0944-01A-01R-0692-07	Dead	223	LUSC	4.16942
TCGA-22-1000-01A-01R-A32Z-07	Dead	454	LUSC	1.99201
TCGA-22-1002-01A-01R-0692-07	Dead	131	LUSC	2.05918
TCGA-22-1005-01A-01R-0692-07	Dead	1953	LUSC	1.11557
TCGA-22-1011-01A-01R-0692-07	Dead	53	LUSC	2.77254
TCGA-22-1012-01A-01R-0692-07	Dead	429	LUSC	4.66274
TCGA-22-1016-01A-01R-0692-07	Dead	822	LUSC	3.39456
TCGA-22-1017-01A-01R-0692-07	Dead	1485	LUSC	2.10591
TCGA-22-4591-01A-01R-1201-07	Dead	623	LUSC	3.29977
TCGA-22-4593-01A-21R-1820-07	Dead	1067	LUSC	3.04672
TCGA-22-4594-01A-01R-1201-07	Dead	1470	LUSC	2.19497
TCGA-22-4595-01A-01R-1201-07	Dead	734	LUSC	3.32839
TCGA-22-4596-01A-01R-1201-07	Dead	17	LUSC	2.8654
TCGA-22-4599-01A-01R-1443-07	Dead	1161	LUSC	2.53625
TCGA-22-4601-01A-01R-1443-07	Dead	1057	LUSC	5.12309
TCGA-22-4604-01A-01R-1201-07	Dead	399	LUSC	3.09646
TCGA-22-4605-01A-21R-2125-07	Dead	974	LUSC	4.60584
TCGA-22-4607-01A-01R-1201-07	Dead	587	LUSC	2.88518
TCGA-22-4609-01A-21R-2125-07	Dead	291	LUSC	4.13116
TCGA-22-4613-01A-01R-1443-07	Dead	358	LUSC	4.10563
TCGA-22-5471-01A-01R-1635-07	Alive	1845	LUSC	3.85737
TCGA-22-5472-01A-01R-1635-07	Dead	1975	LUSC	3.67871
TCGA-22-5473-01A-01R-1635-07	Dead	1933	LUSC	3.85817
TCGA-22-5474-01A-01R-1635-07	Dead	445	LUSC	2.37593
TCGA-22-5477-01A-01R-1635-07	Dead	1346	LUSC	1.90092
TCGA-22-5478-01A-01R-1635-07	Dead	24	LUSC	4.33842
TCGA-22-5479-01A-31R-1949-07	Dead	2625	LUSC	3.63007
TCGA-22-5480-01A-01R-1635-07	Dead	2170	LUSC	2.19793
TCGA-22-5481-01A-31R-1949-07	Dead	2409	LUSC	3.52123
TCGA-22-5482-01A-01R-1635-07	Dead	357	LUSC	5.18564
TCGA-22-5483-01A-01R-1820-07	Dead	573	LUSC	2.39083
TCGA-22-5485-01A-01R-1635-07	Dead	916	LUSC	2.80538
TCGA-22-5489-01A-01R-1635-07	Dead	1912	LUSC	2.89765
TCGA-22-5491-01A-01R-1635-07	Dead	1713	LUSC	3.27824
TCGA-22-5492-01A-01R-1635-07	Dead	506	LUSC	2.36126
TCGA-22-A5C4-01A-12R-A27Q-07	Alive	671	LUSC	3.51602
TCGA-23-1021-01B-01R-1564-13	Dead	1446	OV	2.42331
TCGA-23-1022-01A-01R-1564-13	Dead	1511	OV	5.39309
TCGA-23-1023-01A-02R-1564-13	Alive	1233	OV	2.62349
TCGA-23-1024-01A-02R-1564-13	Alive	468	OV	4.06175
TCGA-23-1026-01B-01R-1569-13	Alive	816	OV	2.92317
TCGA-23-1027-01A-02R-1564-13	Dead	976	OV	3.27536
TCGA-23-1028-01A-01R-1564-13	Alive	1503	OV	2.9072
TCGA-23-1029-01B-01R-1567-13	Alive	268	OV	2.52072
TCGA-23-1030-01A-02R-1564-13	Alive	886	OV	2.05523
TCGA-23-1107-01A-01R-1564-13	Dead	9	OV	2.96057
TCGA-23-1109-01A-01R-1564-13	Dead	1562	OV	2.24659
TCGA-23-1110-01A-01R-1564-13	Alive	1658	OV	4.64537
TCGA-23-1111-01A-01R-1567-13	Alive	98	OV	1.70461
TCGA-23-1113-01A-01R-1564-13	Dead	949	OV	3.32302
TCGA-23-1114-01B-01R-1566-13	Dead	2089	OV	4.35728
TCGA-23-1116-01A-01R-1564-13	Dead	592	OV	3.43543
TCGA-23-1118-01A-01R-1564-13	Alive	2616	OV	2.45207
TCGA-23-1119-01A-02R-1565-13	Alive	3953	OV	4.20604
TCGA-23-1120-01A-02R-1565-13	Alive	130	OV	3.94646
TCGA-23-1122-01A-01R-1565-13	Dead	1189	OV	3.2841
TCGA-23-1123-01A-01R-1565-13	Dead	1018	OV	4.49395
TCGA-23-1809-01A-01R-1566-13	Alive	16	OV	3.73382
TCGA-23-2077-01A-01R-1568-13	Alive	3525	OV	4.10275
TCGA-23-2078-01A-01R-1568-13	Alive	2661	OV	3.70119
TCGA-23-2084-01A-02R-1568-13	Dead	1516	OV	3.07056
TCGA-24-0966-01A-01R-1564-13	Alive	232	OV	2.21704
TCGA-24-0968-01A-01R-1569-13	Dead		OV	2.57352
TCGA-24-0970-01B-01R-1565-13	Dead	354	OV	2.99117
TCGA-24-0979-01A-01R-1565-13	Dead	1264	OV	3.1832
TCGA-24-0982-01A-01R-1565-13	Dead	679	OV	3.15308
TCGA-24-1103-01A-01R-1565-13	Dead	1646	OV	3.01402
TCGA-24-1104-01A-01R-1565-13	Dead	1933	OV	2.70334
TCGA-24-1105-01A-01R-1565-13	Dead	1442	OV	3.94262
TCGA-24-1413-01A-01R-1565-13	Alive	192	OV	2.98455
TCGA-24-1416-01A-01R-1565-13	Alive	194	OV	1.92345
TCGA-24-1417-01A-01R-1565-13	Alive	238	OV	3.07782
TCGA-24-1418-01A-01R-1565-13	Alive	243	OV	2.19969
TCGA-24-1419-01A-01R-1565-13	Alive	239	OV	4.4724
TCGA-24-1422-01A-01R-1565-13	Dead	23	OV	2.69357
TCGA-24-1423-01A-01R-1565-13	Alive	190	OV	3.82402
TCGA-24-1424-01A-01R-1565-13	Alive	183	OV	4.35992
TCGA-24-1425-01A-02R-1566-13	Alive	181	OV	2.12191
TCGA-24-1426-01A-01R-1565-13	Alive	163	OV	2.01432
TCGA-24-1427-01A-01R-1565-13	Alive	147	OV	3.33708
TCGA-24-1428-01A-01R-1564-13	Alive	529	OV	3.10414
TCGA-24-1430-01A-01R-1566-13	Dead	863	OV	3.93473
TCGA-24-1431-01A-01R-1566-13	Dead	567	OV	1.71444
TCGA-24-1434-01A-01R-1566-13	Dead	568	OV	2.70399
TCGA-24-1435-01A-01R-1566-13	Dead	1324	OV	4.1916
TCGA-24-1464-01A-01R-1566-13	Dead	379	OV	3.55818
TCGA-24-1467-01A-01R-1566-13	Dead	3224	OV	3.00247
TCGA-24-1469-01A-01R-1566-13	Alive	277	OV	4.04832
TCGA-24-1470-01A-01R-1566-13	Alive	105	OV	3.47102
TCGA-24-1471-01A-01R-1566-13	Alive	36	OV	2.1335
TCGA-24-1474-01A-01R-1566-13	Dead	676	OV	5.25029
TCGA-24-1544-01A-01R-1566-13	Dead	820	OV	5.23073
TCGA-24-1546-01A-01R-1566-13	Dead	1955	OV	5.04357
TCGA-24-1549-01A-01R-1566-13	Dead	1721	OV	2.98474
TCGA-24-1550-01A-01R-1566-13	Dead	1249	OV	4.39812
TCGA-24-1551-01A-01R-1566-13	Dead	1579	OV	2.62476
TCGA-24-1552-01A-01R-1566-13	Dead	1259	OV	2.86055
TCGA-24-1553-01A-01R-1566-13	Dead	1767	OV	3.86382
TCGA-24-1557-01A-01R-1566-13	Dead	1213	OV	3.3084
TCGA-24-1558-01A-01R-1566-13	Dead	594	OV	4.60085
TCGA-24-1560-01A-01R-1566-13	Dead	1341	OV	2.98149
TCGA-24-1562-01A-01R-1566-13	Dead	1384	OV	2.93529
TCGA-24-1563-01A-01R-1566-13	Dead	1451	OV	3.04597
TCGA-24-1564-01A-01R-1566-13	Dead	787	OV	3.71565
TCGA-24-1565-01A-01R-1566-13	Dead	312	OV	2.50909
TCGA-24-1567-01A-01R-1566-13	Dead	524	OV	5.53963
TCGA-24-1603-01A-01R-1566-13	Dead	2742	OV	3.06803
TCGA-24-1604-01A-01R-1566-13	Dead	2688	OV	2.94403
TCGA-24-1616-01A-01R-1566-13	Dead	1163	OV	3.19142
TCGA-24-1842-01A-01R-1567-13	Alive	253	OV	3.23016
TCGA-24-1843-01A-01R-1567-13	Alive	106	OV	2.60739
TCGA-24-1844-01A-01R-1567-13	Alive	113	OV	3.89898
TCGA-24-1845-01A-01R-1567-13	Alive	116	OV	2.71169
TCGA-24-1846-01A-01R-1567-13	Alive	133	OV	2.86324
TCGA-24-1847-01A-01R-1566-13	Alive	343	OV	2.4557
TCGA-24-1850-01A-01R-1567-13	Alive	168	OV	4.45418
TCGA-24-1923-01A-01R-1567-13	Dead	690	OV	3.22172
TCGA-24-1924-01A-01R-1567-13	Dead	919	OV	3.53277
TCGA-24-1928-01A-01R-1567-13	Dead	336	OV	2.76909
TCGA-24-1930-01A-01R-1567-13	Dead	2467	OV	1.97379
TCGA-24-2020-01A-01R-1567-13	Dead	4624	OV	3.41171
TCGA-24-2023-01A-01R-1567-13	Dead	1364	OV	2.80166
TCGA-24-2024-01A-02R-1568-13	Dead	1769	OV	3.6063
TCGA-24-2026-01A-01R-1567-13	Dead	1059	OV	3.87611
TCGA-24-2027-01A-01R-1567-13	Dead	3337	OV	3.28419
TCGA-24-2033-01A-01R-1568-13	Dead	562	OV	3.1927
TCGA-24-2035-01A-01R-1568-13	Dead	857	OV	1.43728
TCGA-24-2036-01A-01R-1568-13	Dead	1947	OV	3.28321
TCGA-24-2038-01A-01R-1568-13	Dead	1354	OV	2.20786
TCGA-24-2254-01A-01R-1568-13	Dead	1736	OV	3.82546
TCGA-24-2261-01A-01R-1568-13	Dead	24	OV	3.14094
TCGA-24-2262-01A-01R-1568-13	Dead	11	OV	4.43403
TCGA-24-2267-01A-01R-1568-13	Dead	1446	OV	2.2286
TCGA-24-2271-01A-01R-1568-13	Dead	962	OV	2.55795
TCGA-24-2280-01A-01R-1568-13	Alive	2143	OV	3.52293
TCGA-24-2281-01A-01R-1568-13	Alive	1357	OV	2.71477
TCGA-24-2288-01A-01R-1568-13	Dead	25	OV	2.93655
TCGA-24-2289-01A-01R-1568-13	Dead	2049	OV	3.42373
TCGA-24-2290-01A-01R-1568-13	Dead	1102	OV	2.12565
TCGA-24-2293-01A-01R-1568-13	Dead	506	OV	1.85096
TCGA-24-2297-01A-01R-1568-13	Dead	1699	OV	2.50284
TCGA-24-2298-01A-01R-1569-13	Dead	1620	OV	2.61648
TCGA-25-1312-01A-01R-1565-13	Dead	31	OV	1.76396
TCGA-25-1313-01A-01R-1565-13	Dead	820	OV	2.10145
TCGA-25-1315-01A-01R-1565-13	Dead	1583	OV	3.97604
TCGA-25-1316-01A-01R-1565-13	Dead	1279	OV	5.89921
TCGA-25-1317-01A-01R-1565-13	Dead	61	OV	4.87858
TCGA-25-1318-01A-01R-1565-13	Dead	1064	OV	3.57754
TCGA-25-1319-01A-01R-1565-13	Dead	1977	OV	3.66111
TCGA-25-1320-01A-01R-1565-13	Dead	1155	OV	3.65297
TCGA-25-1321-01A-01R-1565-13	Dead	1033	OV	2.89272
TCGA-25-1322-01A-01R-1565-13	Dead	91	OV	3.04867
TCGA-25-1323-01A-01R-1565-13	Dead	395	OV	4.87282
TCGA-25-1326-01A-01R-1565-13	Dead	1249	OV	3.59736
TCGA-25-1328-01A-01R-1565-13	Dead	2009	OV	2.42019
TCGA-25-1329-01A-01R-1565-13	Dead	457	OV	3.20566
TCGA-25-1623-01A-01R-1566-13	Dead	565	OV	2.9119
TCGA-25-1626-01A-01R-1566-13	Dead	518	OV	2.4969
TCGA-25-1627-01A-01R-1566-13	Dead	394	OV	3.73816
TCGA-25-1628-01A-01R-1566-13	Dead	627	OV	3.35062
TCGA-25-1630-01A-01R-1566-13	Dead	1162	OV	3.22788
TCGA-25-1631-01A-01R-1569-13	Dead	9	OV	3.36199
TCGA-25-1632-01A-01R-1566-13	Dead	1799	OV	4.13754
TCGA-25-1633-01A-01R-1566-13	Dead	1891	OV	4.55469
TCGA-25-1634-01A-01R-1566-13	Dead	1091	OV	3.87141
TCGA-25-1635-01A-01R-1566-13	Dead	1583	OV	3.26437
TCGA-25-1870-01A-01R-1567-13	Dead	455	OV	2.44806
TCGA-25-1877-01A-01R-1567-13	Dead	730	OV	4.96125
TCGA-25-2042-01A-01R-1568-13	Dead	396	OV	2.37868
TCGA-25-2391-01A-01R-1569-13	Dead	1492	OV	3.55128
TCGA-25-2392-01A-01R-1569-13	Dead	31	OV	2.86279
TCGA-25-2393-01A-01R-1569-13	Dead	1157	OV	4.37145
TCGA-25-2396-01A-01R-1569-13	Dead	92	OV	2.01596
TCGA-25-2397-01A-01R-1569-13	Dead	365	OV	2.69851
TCGA-25-2398-01A-01R-1569-13	Dead	1369	OV	3.80121
TCGA-25-2399-01A-01R-1569-13	Dead	608	OV	3.73144
TCGA-25-2400-01A-01R-1569-13	Dead	1278	OV	3.07451
TCGA-25-2401-01A-01R-1569-13	Dead	90	OV	2.41129
TCGA-25-2404-01A-01R-1569-13	Dead	883	OV	2.96412
TCGA-25-2409-01A-01R-1569-13	Dead	821	OV	2.25005
TCGA-26-1442-01A-01R-1850-01	Alive	953	GBM	3.40364
TCGA-26-5132-01A-01R-1850-01	Alive	286	GBM	4.67452
TCGA-26-5133-01A-01R-1850-01	Alive	452	GBM	3.53442
TCGA-26-5134-01A-01R-1850-01	Alive	167	GBM	3.46019
TCGA-26-5135-01A-01R-1850-01	Dead	270	GBM	3.51116
TCGA-26-5136-01B-01R-1850-01	Dead	577	GBM	4.23747
TCGA-26-5139-01A-01R-1850-01	Alive	48	GBM	2.89631
TCGA-27-1830-01A-01R-1850-01	Dead	154	GBM	2.60777
TCGA-27-1831-01A-01R-1850-01	Dead	505	GBM	1.80995
TCGA-27-1832-01A-01R-1850-01	Dead	300	GBM	2.79844
TCGA-27-1834-01A-01R-1850-01	Dead	1233	GBM	3.25479
TCGA-27-1835-01A-01R-1850-01	Dead	648	GBM	1.9571
TCGA-27-1837-01A-01R-1850-01	Dead	427	GBM	2.58253
TCGA-27-2519-01A-01R-1850-01	Dead	550	GBM	2.98698
TCGA-27-2521-01A-01R-1850-01	Dead	510	GBM	3.83128
TCGA-27-2523-01A-01R-1850-01	Dead	489	GBM	2.33368
TCGA-27-2524-01A-01R-1850-01	Dead	231	GBM	2.97471
TCGA-27-2526-01A-01R-1850-01	Dead	87	GBM	2.15264
TCGA-27-2528-01A-01R-1850-01	Dead	480	GBM	2.90508
TCGA-28-1747-01C-01R-1850-01	Dead	77	GBM	3.06924
TCGA-28-1753-01A-01R-1850-01	Alive	37	GBM	1.78509
TCGA-28-2499-01A-01R-1850-01	Alive	95	GBM	2.39854
TCGA-28-2509-01A-01R-1850-01	Alive	145	GBM	4.0179
TCGA-28-2513-01A-01R-1850-01	Alive	222	GBM	1.9668
TCGA-28-2514-01A-02R-1850-01	Alive	160	GBM	3.96021
TCGA-28-5204-01A-01R-1850-01	Dead	454	GBM	2.1859
TCGA-28-5207-01A-01R-1850-01	Dead	343	GBM	3.00394
TCGA-28-5208-01A-01R-1850-01	Dead	544	GBM	3.19676
TCGA-28-5209-01A-01R-1850-01	Alive	442	GBM	2.59364
TCGA-28-5213-01A-01R-1850-01	Alive	951	GBM	2.62555
TCGA-28-5215-01A-01R-1850-01	Dead	335	GBM	2.28386
TCGA-28-5216-01A-01R-1850-01	Alive	415	GBM	3.69237
TCGA-28-5218-01A-01R-1850-01	Dead	157	GBM	1.76048
TCGA-28-5220-01A-01R-1850-01	Dead	388	GBM	2.22555
TCGA-29-1688-01A-01R-1566-13	Dead	2400	OV	2.3425
TCGA-29-1690-01A-01R-1566-13	Dead	1448	OV	3.87402
TCGA-29-1691-01A-01R-1566-13	Dead	1470	OV	3.92686
TCGA-29-1693-01A-01R-1567-13	Alive	3096	OV	3.52222
TCGA-29-1694-01A-01R-1567-13	Dead	1187	OV	3.63156
TCGA-29-1695-01A-01R-1567-13	Dead	1229	OV	3.40972
TCGA-29-1696-01A-01R-1567-13	Dead	1032	OV	3.34042
TCGA-29-1697-01A-01R-1567-13	Dead	949	OV	3.36958
TCGA-29-1701-01A-01R-1567-13	Dead	515	OV	3.28828
TCGA-29-1703-01A-01R-1567-13	Dead	1815	OV	4.27222
TCGA-29-1705-01A-01R-1567-13	Dead	555	OV	2.27545
TCGA-29-1707-02A-01R-1567-13	Alive	1277	OV	2.89321
TCGA-29-1710-01A-02R-1567-13	Dead	951	OV	3.25372
TCGA-29-1711-01A-01R-1567-13	Alive	1053	OV	3.58747
TCGA-29-1761-01A-01R-1567-13	Dead	528	OV	2.68975
TCGA-29-1762-01A-01R-1567-13	Dead	2634	OV	4.51273
TCGA-29-1763-01A-02R-1567-13	Alive	2032	OV	4.35621
TCGA-29-1766-01A-01R-1567-13	Dead	1199	OV	3.49436
TCGA-29-1768-01A-01R-1567-13	Dead	952	OV	2.44414
TCGA-29-1769-01A-01R-1567-13	Alive	699	OV	3.8225
TCGA-29-1770-01A-01R-1567-13	Alive	741	OV	2.52742
TCGA-29-1774-01A-01R-1567-13	Alive	527	OV	4.86457
TCGA-29-1776-01A-01R-1567-13	Alive	360	OV	2.79477
TCGA-29-1777-01A-01R-1567-13	Alive	374	OV	2.70591
TCGA-29-1778-01A-01R-1567-13	Alive	454	OV	2.31208
TCGA-29-1781-01A-01R-1567-13	Alive	255	OV	2.43379
TCGA-29-1783-01A-01R-1567-13	Alive	220	OV	3.06931
TCGA-29-1784-01A-02R-1567-13	Alive	163	OV	3.40932
TCGA-29-1785-01A-01R-1567-13	Dead	1104	OV	2.58532
TCGA-29-2414-01A-02R-1569-13	Dead	2621	OV	4.25401
TCGA-29-2414-02A-01R-1569-13	Dead	2621	OV	3.79843
TCGA-29-2425-01A-01R-1569-13	Alive	1977	OV	4.13288
TCGA-29-2427-01A-01R-1569-13	Alive	1900	OV	1.88799
TCGA-29-2428-01A-01R-1569-13	Alive	1372	OV	5.022
TCGA-29-A5NZ-01A-11R-A406-31	Dead	1088	OV	3.7098
TCGA-2A-A8VL-01A-21R-A37L-07	Alive	621	PRAD	1.80966
TCGA-2A-A8VO-01A-11R-A37L-07	Alive	1701	PRAD	1.60008
TCGA-2A-A8VT-01A-11R-A37L-07	Alive	1373	PRAD	2.18237
TCGA-2A-A8VV-01A-11R-A37L-07	Alive	671	PRAD	1.76757
TCGA-2A-A8VX-01A-11R-A37L-07	Alive	1378	PRAD	2.33248
TCGA-2A-A8W1-01A-11R-A37L-07	Alive	112	PRAD	1.13172
TCGA-2A-A8W3-01A-11R-A37L-07	Alive	863	PRAD	4.81607
TCGA-2A-AAYF-01A-11R-A41O-07	Alive	1364	PRAD	2.04987
TCGA-2A-AAYO-01A-11R-A41O-07	Alive	1272	PRAD	1.79427
TCGA-2A-AAYU-01A-11R-A41O-07	Alive	615	PRAD	2.00482
TCGA-2E-A9G8-01A-11R-A40A-07	Alive	1249	UCEC	3.41823
TCGA-2F-A9KO-01A-11R-A38B-07	Dead	734	BLCA	1.87011
TCGA-2F-A9KP-01A-11R-A38B-07	Dead	364	BLCA	2.52692
TCGA-2F-A9KQ-01A-11R-A38B-07	Alive	2886	BLCA	2.64238
TCGA-2F-A9KR-01A-11R-A38B-07	Dead	3183	BLCA	4.87458
TCGA-2F-A9KT-01A-11R-A38B-07	Alive	3314	BLCA	3.43429
TCGA-2F-A9KW-01A-11R-A38B-07	Dead	254	BLCA	1.05728
TCGA-2G-AAEW-01A-11R-A430-07	Dead	618	TGCT	3.86145
TCGA-2G-AAEX-01A-11R-A430-07	Alive	1259	TGCT	3.67129
TCGA-2G-AAF1-01A-11R-A430-07	Alive	1403	TGCT	3.63901
TCGA-2G-AAF4-01A-11R-A430-07	Alive	2315	TGCT	3.27676
TCGA-2G-AAF6-01A-11R-A430-07	Alive	3491	TGCT	3.86921
TCGA-2G-AAF8-01A-11R-A430-07	Alive	3911	TGCT	3.91692
TCGA-2G-AAFE-01A-11R-A430-07	Alive	4702	TGCT	4.12192
TCGA-2G-AAFG-01A-11R-A430-07	Alive	6183	TGCT	3.59979
TCGA-2G-AAFG-05A-11R-A430-07	Alive	6183	TGCT	3.5501
TCGA-2G-AAFH-01A-12R-A430-07	Alive	1375	TGCT	2.82224
TCGA-2G-AAFI-01A-21R-A430-07	Alive	675	TGCT	2.48316
TCGA-2G-AAFJ-01A-11R-A430-07	Alive	792	TGCT	3.08928
TCGA-2G-AAFL-01A-21R-A430-07	Alive	750	TGCT	2.33282
TCGA-2G-AAFM-01A-11R-A430-07	Alive	503	TGCT	3.54289
TCGA-2G-AAFN-01A-31R-A430-07	Alive	773	TGCT	2.82737
TCGA-2G-AAFO-01A-31R-A430-07	Alive	685	TGCT	2.7411
TCGA-2G-AAFV-01A-11R-A430-07	Alive	1389	TGCT	2.82823
TCGA-2G-AAFY-01A-11R-A430-07	Alive	1099	TGCT	2.17913
TCGA-2G-AAFZ-01A-11R-A430-07	Alive	1353	TGCT	2.40248
TCGA-2G-AAG0-01A-11R-A430-07	Alive	1529	TGCT	2.35885
TCGA-2G-AAG3-01A-11R-A430-07	Alive	1593	TGCT	3.58861
TCGA-2G-AAG5-01A-11R-A430-07	Alive	2299	TGCT	2.71427
TCGA-2G-AAG6-01A-11R-A430-07	Alive	2231	TGCT	2.71861
TCGA-2G-AAG7-01A-11R-A430-07	Alive	2475	TGCT	2.4995
TCGA-2G-AAG8-01A-31R-A430-07	Alive	2289	TGCT	2.24814
TCGA-2G-AAG9-01A-11R-A430-07	Alive	2234	TGCT	3.87212
TCGA-2G-AAGA-01A-11R-A430-07	Alive	2439	TGCT	2.35502
TCGA-2G-AAGC-01A-21R-A430-07	Alive	2585	TGCT	2.80172
TCGA-2G-AAGE-01A-21R-A430-07	Alive	2478	TGCT	2.27953
TCGA-2G-AAGF-01A-31R-A430-07	Alive	2734	TGCT	2.79489
TCGA-2G-AAGG-01A-11R-A430-07	Alive	2611	TGCT	2.44186
TCGA-2G-AAGI-01A-11R-A430-07	Alive	3137	TGCT	2.62616
TCGA-2G-AAGI-05A-11R-A430-07	Alive	3137	TGCT	3.80038
TCGA-2G-AAGJ-01A-11R-A430-07	Alive	2938	TGCT	1.67143
TCGA-2G-AAGK-01A-11R-A430-07	Alive	3621	TGCT	2.53677
TCGA-2G-AAGM-01A-11R-A430-07	Alive	3891	TGCT	1.90758
TCGA-2G-AAGN-01A-11R-A430-07	Alive	3656	TGCT	1.81348
TCGA-2G-AAGO-01A-11R-A430-07	Alive	4026	TGCT	2.37106
TCGA-2G-AAGP-01A-11R-A430-07	Alive	4018	TGCT	1.97845
TCGA-2G-AAGS-01A-11R-A430-07	Alive	4816	TGCT	3.18222
TCGA-2G-AAGT-01A-11R-A430-07	Alive	4406	TGCT	2.28549
TCGA-2G-AAGV-01A-11R-A430-07	Alive	4527	TGCT	4.42545
TCGA-2G-AAGW-01A-11R-A430-07	Alive	4899	TGCT	2.3051
TCGA-2G-AAGX-01A-11R-A430-07	Alive	5514	TGCT	2.91718
TCGA-2G-AAGY-01A-11R-A430-07	Alive	5329	TGCT	3.87251
TCGA-2G-AAGY-05A-11R-A430-07	Alive	5329	TGCT	3.6378
TCGA-2G-AAGZ-01A-11R-A430-07	Alive	5233	TGCT	2.83883
TCGA-2G-AAH0-01A-11R-A430-07	Alive	5477	TGCT	3.80699
TCGA-2G-AAH2-01A-11R-A430-07	Alive	6060	TGCT	2.86584
TCGA-2G-AAH3-01A-11R-A430-07	Alive	1822	TGCT	3.70558
TCGA-2G-AAH4-01A-12R-A430-07	Alive	6210	TGCT	3.24682
TCGA-2G-AAH8-01A-11R-A430-07	Alive	2248	TGCT	3.95458
TCGA-2G-AAHA-01A-11R-A430-07	Alive	3349	TGCT	4.31436
TCGA-2G-AAHC-01A-11R-A430-07	Alive	5539	TGCT	3.77923
TCGA-2G-AAHG-01A-11R-A430-07	Alive	1819	TGCT	4.47885
TCGA-2G-AAHL-01A-11R-A430-07	Alive	7081	TGCT	4.25404
TCGA-2G-AAHN-01A-11R-A430-07	Alive	6445	TGCT	4.10667
TCGA-2G-AAHP-01A-12R-A430-07	Alive	5667	TGCT	4.70587
TCGA-2G-AAHP-05A-11R-A430-07	Alive	5667	TGCT	3.89931
TCGA-2G-AAHT-01A-11R-A430-07	Alive	542	TGCT	3.75142
TCGA-2G-AAKD-01A-31R-A430-07	Alive	6340	TGCT	3.67013
TCGA-2G-AAKG-01A-11R-A430-07	Alive	6598	TGCT	3.2034
TCGA-2G-AAKG-05A-11R-A430-07	Alive	6598	TGCT	3.06357
TCGA-2G-AAKH-01A-11R-A430-07	Alive	6862	TGCT	1.81344
TCGA-2G-AAKL-01A-11R-A430-07	Alive	7023	TGCT	1.49503
TCGA-2G-AAKM-01A-11R-A430-07	Dead	6972	TGCT	2.56677
TCGA-2G-AAL5-01A-11R-A430-07	Alive	7437	TGCT	3.32007
TCGA-2G-AAL7-01A-11R-A430-07	Alive	3991	TGCT	2.43898
TCGA-2G-AALP-01A-12R-A430-07	Alive	2645	TGCT	3.72384
TCGA-2H-A9GF-01A-11R-A37I-31	Dead	784	ESCA	1.84322
TCGA-2H-A9GG-01A-11R-A37I-31	Dead	610	ESCA	2.79244
TCGA-2H-A9GH-01A-11R-A37I-31	Dead	951	ESCA	2.43848
TCGA-2H-A9GI-01A-11R-A37I-31	Dead	435	ESCA	4.60447
TCGA-2H-A9GJ-01A-11R-A37I-31	Dead	1781	ESCA	2.63636
TCGA-2H-A9GK-01A-11R-A37I-31	Dead	232	ESCA	1.42186
TCGA-2H-A9GL-01A-12R-A37I-31	Dead	180	ESCA	0.910963
TCGA-2H-A9GM-01A-11R-A37I-31	Dead	424	ESCA	3.57931
TCGA-2H-A9GN-01A-11R-A37I-31	Dead	272	ESCA	3.17943
TCGA-2H-A9GO-01A-11R-A37I-31	Dead	494	ESCA	1.96905
TCGA-2H-A9GQ-01A-11R-A37I-31	Dead	128	ESCA	6.34143
TCGA-2H-A9GR-01A-12R-A37I-31	Dead	987	ESCA	3.22733
TCGA-2J-AAB1-01A-11R-A41B-07	Dead	66	PAAD	3.43273
TCGA-2J-AAB4-01A-12R-A41B-07	Alive	729	PAAD	4.30573
TCGA-2J-AAB6-01A-11R-A41B-07	Dead	293	PAAD	3.86717
TCGA-2J-AAB8-01A-12R-A41B-07	Alive	80	PAAD	4.45807
TCGA-2J-AAB9-01A-11R-A41B-07	Dead	627	PAAD	2.03854
TCGA-2J-AABA-01A-21R-A41B-07	Dead	607	PAAD	3.1203
TCGA-2J-AABE-01A-12R-A41B-07	Alive	676	PAAD	4.53124
TCGA-2J-AABF-01A-31R-A41B-07	Dead	691	PAAD	2.53104
TCGA-2J-AABH-01A-21R-A41B-07	Alive	1287	PAAD	5.15717
TCGA-2J-AABI-01A-12R-A41B-07	Alive	969	PAAD	2.57546
TCGA-2J-AABK-01A-31R-A41B-07	Alive	484	PAAD	3.80616
TCGA-2J-AABO-01A-21R-A41B-07	Alive	440	PAAD	2.12895
TCGA-2J-AABP-01A-11R-A41B-07	Alive	463	PAAD	2.16726
TCGA-2J-AABR-01A-11R-A41B-07	Alive	438	PAAD	1.77762
TCGA-2J-AABT-01A-11R-A41B-07	Alive	319	PAAD	3.75253
TCGA-2J-AABU-01A-11R-A41B-07	Dead	277	PAAD	3.49038
TCGA-2J-AABV-01A-12R-A41B-07	Dead	652	PAAD	1.09112
TCGA-2K-A9WE-01A-11R-A38C-07	Alive	214	KIRP	1.2759
TCGA-2L-AAQA-01A-21R-A38C-07	Dead	143	PAAD	5.34865
TCGA-2L-AAQE-01A-11R-A39D-07	Dead	684	PAAD	2.46344
TCGA-2L-AAQI-01A-12R-A39D-07	Dead	103	PAAD	3.64518
TCGA-2L-AAQJ-01A-12R-A39D-07	Dead	394	PAAD	4.35482
TCGA-2L-AAQL-01A-11R-A38C-07	Dead	292	PAAD	5.43393
TCGA-2L-AAQM-01A-11R-A39D-07	Alive	1383	PAAD	4.82955
TCGA-2V-A95S-01A-11R-A37K-07	Alive		LIHC	1.38565
TCGA-2W-A8YY-01A-11R-A37O-07	Alive	533	CESC	3.87802
TCGA-2X-A9D5-01A-11R-A430-07	Alive	435	TGCT	3.11016
TCGA-2X-A9D6-01A-11R-A430-07	Alive	607	TGCT	2.96029
TCGA-2Y-A9GS-01A-12R-A38B-07	Dead	724	LIHC	1.42787
TCGA-2Y-A9GT-01A-11R-A38B-07	Dead	1624	LIHC	0.338339
TCGA-2Y-A9GU-01A-11R-A38B-07	Alive	1939	LIHC	0.725523
TCGA-2Y-A9GV-01A-11R-A38B-07	Dead	2532	LIHC	0.545079
TCGA-2Y-A9GW-01A-11R-A38B-07	Dead	1271	LIHC	1.12068
TCGA-2Y-A9GX-01A-11R-A38B-07	Alive	2442	LIHC	0.540722
TCGA-2Y-A9GY-01A-11R-A38B-07	Dead	757	LIHC	2.59684
TCGA-2Y-A9GZ-01A-11R-A39D-07	Dead	848	LIHC	0.788017
TCGA-2Y-A9H0-01A-11R-A38B-07	Alive	3675	LIHC	1.97255
TCGA-2Y-A9H1-01A-11R-A38B-07	Dead	1229	LIHC	1.49483
TCGA-2Y-A9H2-01A-12R-A38B-07	Alive	1731	LIHC	1.64432
TCGA-2Y-A9H3-01A-11R-A38B-07	Alive	1516	LIHC	1.23346
TCGA-2Y-A9H4-01A-11R-A38B-07	Alive	1452	LIHC	1.0165
TCGA-2Y-A9H5-01A-11R-A38B-07	Dead	555	LIHC	1.9123
TCGA-2Y-A9H6-01A-11R-A39D-07	Alive	357	LIHC	0.612494
TCGA-2Y-A9H7-01A-11R-A39D-07	Alive	1168	LIHC	0.720629
TCGA-2Y-A9H8-01A-11R-A39D-07	Dead	633	LIHC	1.45159
TCGA-2Y-A9H9-01A-21R-A39D-07	Alive	697	LIHC	1.35321
TCGA-2Y-A9HA-01A-11R-A39D-07	Dead	36	LIHC	3.37092
TCGA-2Y-A9HB-01A-11R-A39D-07	Alive	260	LIHC	1.1516
TCGA-2Z-A9J1-01A-11R-A38C-07	Alive	2298	KIRP	2.08743
TCGA-2Z-A9J2-01A-11R-A38C-07	Alive	1795	KIRP	1.30206
TCGA-2Z-A9J3-01A-12R-A38C-07	Dead	1771	KIRP	2.79275
TCGA-2Z-A9J5-01A-21R-A38C-07	Alive	3050	KIRP	2.28629
TCGA-2Z-A9J6-01A-11R-A38C-07	Alive	1731	KIRP	2.51468
TCGA-2Z-A9J7-01A-11R-A38C-07	Dead	139	KIRP	2.2216
TCGA-2Z-A9J8-01A-11R-A42S-07	Alive	2790	KIRP	0.908044
TCGA-2Z-A9J9-01A-11R-A42S-07	Alive	2294	KIRP	2.83586
TCGA-2Z-A9JD-01A-11R-A42S-07	Alive	1060	KIRP	0.863621
TCGA-2Z-A9JE-01A-11R-A42S-07	Alive	1728	KIRP	2.00777
TCGA-2Z-A9JG-01A-11R-A42S-07	Alive	1662	KIRP	1.43691
TCGA-2Z-A9JI-01A-11R-A42S-07	Alive	1567	KIRP	1.27417
TCGA-2Z-A9JJ-01A-11R-A42S-07	Alive	1213	KIRP	2.55582
TCGA-2Z-A9JK-01A-11R-A42S-07	Alive	1186	KIRP	2.68104
TCGA-2Z-A9JL-01A-11R-A42S-07	Alive	1006	KIRP	1.30725
TCGA-2Z-A9JM-01A-12R-A42S-07	Alive	934	KIRP	1.68495
TCGA-2Z-A9JN-01A-21R-A42S-07	Alive	740	KIRP	0.861558
TCGA-2Z-A9JO-01A-11R-A42S-07	Alive	949	KIRP	0.679334
TCGA-2Z-A9JP-01A-11R-A42S-07	Alive	893	KIRP	1.56905
TCGA-2Z-A9JQ-01A-11R-A42S-07	Alive	778	KIRP	1.98441
TCGA-2Z-A9JR-01A-12R-A42S-07	Alive	161	KIRP	1.84639
TCGA-2Z-A9JS-01A-21R-A42S-07	Dead	492	KIRP	1.76141
TCGA-2Z-A9JT-01A-11R-A42S-07	Alive	684	KIRP	1.35004
TCGA-30-1714-01A-02R-1567-13	Dead	1158	OV	5.36807
TCGA-30-1718-01A-01R-1567-13	Dead	1579	OV	3.09722
TCGA-30-1853-01A-02R-1567-13	Dead	1103	OV	3.21891
TCGA-30-1857-01A-02R-1569-13	Dead	8	OV	4.57226
TCGA-30-1860-01A-01R-1568-13	Dead	1366	OV	2.26487
TCGA-30-1861-01A-01R-1568-13	Dead	1058	OV	2.74263
TCGA-30-1862-01A-02R-1568-13	Dead	186	OV	4.42738
TCGA-30-1866-01A-02R-1568-13	Dead	1114	OV	3.0659
TCGA-30-1891-01A-01R-1568-13	Dead	914	OV	3.20325
TCGA-30-1892-01A-01R-1568-13	Dead	1484	OV	2.45531
TCGA-31-1944-01A-01R-1568-13	Alive	1386	OV	2.43614
TCGA-31-1946-01A-01R-1568-13	Alive	918	OV	2.72133
TCGA-31-1950-01A-01R-1568-13	Alive	571	OV	3.88799
TCGA-31-1951-01A-01R-1568-13	Alive	684	OV	2.04618
TCGA-31-1953-01A-01R-1568-13	Alive	204	OV	3.0486
TCGA-31-1956-01A-01R-1568-13	Alive	1342	OV	2.05832
TCGA-31-1959-01A-01R-1568-13	Alive	67	OV	3.19432
TCGA-32-1970-01A-01R-1850-01	Dead	468	GBM	2.71072
TCGA-32-1980-01A-01R-1850-01	Dead	36	GBM	3.85671
TCGA-32-1982-01A-01R-1850-01	Dead	142	GBM	2.18311
TCGA-32-2615-01A-01R-1850-01	Dead	485	GBM	2.47584
TCGA-32-2616-01A-01R-1850-01	Dead	224	GBM	3.94335
TCGA-32-2632-01A-01R-1850-01	Dead	269	GBM	1.8231
TCGA-32-2634-01A-01R-1850-01	Alive	693	GBM	3.0494
TCGA-32-2638-01A-01R-1850-01	Dead	766	GBM	2.1661
TCGA-32-4213-01A-01R-1850-01	Alive	604	GBM	2.52772
TCGA-32-5222-01A-01R-1850-01	Dead	585	GBM	3.1175
TCGA-33-4532-01A-01R-1201-07	Dead	3924	LUSC	3.60267
TCGA-33-4533-01A-01R-1201-07	Alive	4068	LUSC	3.49779
TCGA-33-4538-01A-01R-1201-07	Dead	2979	LUSC	3.18455
TCGA-33-4547-01A-01R-1201-07	Alive	2419	LUSC	2.81525
TCGA-33-4566-01A-01R-1443-07	Dead	5287	LUSC	3.82943
TCGA-33-4582-01A-01R-1443-07	Dead	3149	LUSC	4.90051
TCGA-33-4583-01A-01R-1443-07	Dead	4601	LUSC	3.50554
TCGA-33-4586-01A-01R-1443-07	Dead	428	LUSC	3.88733
TCGA-33-4587-01A-11R-2125-07	Dead	1656	LUSC	5.67601
TCGA-33-4589-01A-01R-1443-07	Dead	47	LUSC	2.32285
TCGA-33-6737-01A-11R-1820-07	Dead	601	LUSC	3.13172
TCGA-33-6738-01A-11R-1949-07	Alive	1927	LUSC	3.12511
TCGA-33-A4WN-01A-11R-A262-07	Dead	143	LUSC	2.96175
TCGA-33-A5GW-01A-11R-A27Q-07	Dead	9	LUSC	3.36917
TCGA-33-AAS8-01A-11R-A405-07	Dead	1114	LUSC	3.07276
TCGA-33-AASB-01A-11R-A405-07	Dead	211	LUSC	4.12136
TCGA-33-AASD-01A-11R-A405-07	Dead	3376	LUSC	3.05396
TCGA-33-AASI-01A-22R-A405-07	Dead	1344	LUSC	2.66218
TCGA-33-AASJ-01A-11R-A405-07	Dead	3600	LUSC	3.82271
TCGA-33-AASL-01A-11R-A405-07	Dead	826	LUSC	3.04264
TCGA-34-2596-01A-01R-0851-07	Dead	80	LUSC	2.40245
TCGA-34-2600-01A-01R-0851-07	Dead	1874	LUSC	3.5154
TCGA-34-2608-01A-02R-0851-07	Dead	1000	LUSC	3.52646
TCGA-34-5231-01A-21R-1820-07	Dead	1984	LUSC	4.95529
TCGA-34-5232-01A-21R-1820-07	Alive	2471	LUSC	2.63626
TCGA-34-5234-01A-01R-1635-07	Alive	2271	LUSC	2.25381
TCGA-34-5236-01A-21R-1820-07	Dead	276	LUSC	4.26493
TCGA-34-5239-01A-21R-1820-07	Alive	1834	LUSC	4.15988
TCGA-34-5240-01A-01R-1443-07	Alive	1541	LUSC	2.82295
TCGA-34-5241-01A-01R-1443-07	Dead	515	LUSC	2.5492
TCGA-34-5927-01A-11R-1820-07	Alive	1361	LUSC	3.56834
TCGA-34-5928-01A-11R-1820-07	Alive	1196	LUSC	4.01181
TCGA-34-5929-01A-11R-1820-07	Dead	151	LUSC	3.85529
TCGA-34-7107-01A-11R-1949-07	Dead	34	LUSC	2.1113
TCGA-34-8454-01A-11R-2326-07	Alive	1180	LUSC	2.91823
TCGA-34-8455-01A-11R-2326-07	Dead	123	LUSC	3.13119
TCGA-34-8456-01A-21R-2326-07	Alive	804	LUSC	3.8172
TCGA-34-A5IX-01A-12R-A27Q-07	Alive	1031	LUSC	2.13511
TCGA-35-3615-01A-01R-0946-07	Alive	14	LUAD	2.11793
TCGA-35-4122-01A-01R-1107-07	Alive	225	LUAD	2.2652
TCGA-35-4123-01A-01R-1107-07	Alive	182	LUAD	3.32655
TCGA-35-5375-01A-01R-1628-07	Alive	264	LUAD	3.676
TCGA-36-1568-01A-01R-1566-13	Alive	875	OV	3.77588
TCGA-36-1569-01A-01R-1566-13	Alive	885	OV	3.13926
TCGA-36-1570-01A-01R-1566-13	Alive	655	OV	2.55643
TCGA-36-1571-01A-01R-1566-13	Dead	695	OV	3.22862
TCGA-36-1574-01A-01R-1566-13	Alive	686	OV	3.34443
TCGA-36-1576-01A-01R-1566-13	Alive	915	OV	4.41439
TCGA-36-1577-01A-01R-1566-13	Alive	783	OV	4.4144
TCGA-36-1580-01A-01R-1566-13	Dead	737	OV	2.45315
TCGA-36-1581-01A-01R-1566-13	Alive	751	OV	3.14949
TCGA-37-3783-01A-01R-1201-07	Alive	122	LUSC	3.48984
TCGA-37-3789-01A-01R-0980-07	Alive	13	LUSC	4.03952
TCGA-37-3792-01A-01R-0980-07	Alive	12	LUSC	1.80892
TCGA-37-4129-01A-01R-1100-07	Alive	242	LUSC	5.21419
TCGA-37-4130-01A-01R-1100-07	Alive	247	LUSC	3.44538
TCGA-37-4132-01A-01R-1100-07	Alive	227	LUSC	2.47721
TCGA-37-4133-01A-01R-1100-07	Alive	238	LUSC	3.0513
TCGA-37-4135-01A-01R-1100-07	Alive	207	LUSC	4.5232
TCGA-37-4141-01A-02R-1100-07	Alive	12	LUSC	3.53968
TCGA-37-5819-01A-01R-1635-07	Alive	103	LUSC	3.02089
TCGA-37-A5EL-01A-11R-A26W-07	Dead	1143	LUSC	3.92429
TCGA-37-A5EM-01A-21R-A27Q-07	Alive	867	LUSC	4.33062
TCGA-37-A5EN-01A-21R-A26W-07	Alive	660	LUSC	4.92768
TCGA-38-4625-01A-01R-1206-07	Alive	2973	LUAD	2.31904
TCGA-38-4626-01A-01R-1206-07	Alive	3674	LUAD	1.31944
TCGA-38-4627-01A-01R-1206-07	Dead	1147	LUAD	1.48522
TCGA-38-4628-01A-01R-1206-07	Dead	1492	LUAD	1.86782
TCGA-38-4629-01A-02R-1206-07	Dead	864	LUAD	2.6169
TCGA-38-4630-01A-01R-1206-07	Dead	1073	LUAD	4.79287
TCGA-38-4631-01A-01R-1755-07	Dead	354	LUAD	2.58443
TCGA-38-4632-01A-01R-1755-07	Dead	1357	LUAD	2.78935
TCGA-38-6178-01A-11R-1755-07	Alive	448	LUAD	3.97279
TCGA-38-7271-01A-11R-2039-07	Dead	800	LUAD	1.67969
TCGA-38-A44F-01A-11R-A24H-07	Alive	133	LUAD	1.84812
TCGA-39-5011-01A-01R-1443-07	Alive	4053	LUSC	1.52822
TCGA-39-5016-01A-01R-1443-07	Alive	3850	LUSC	2.03882
TCGA-39-5019-01A-01R-1820-07	Alive	3387	LUSC	4.25525
TCGA-39-5021-01A-01R-1443-07	Dead	2086	LUSC	3.35209
TCGA-39-5022-01A-21R-1820-07	Dead	1679	LUSC	2.38538
TCGA-39-5024-01A-21R-1820-07	Alive	2510	LUSC	4.64385
TCGA-39-5027-01A-21R-1820-07	Alive	3108	LUSC	3.73878
TCGA-39-5028-01A-01R-1443-07	Dead	52	LUSC	3.65741
TCGA-39-5029-01A-01R-1443-07	Dead	740	LUSC	3.28176
TCGA-39-5030-01A-01R-1443-07	Dead	59	LUSC	1.76558
TCGA-39-5031-01A-01R-1443-07	Dead	1841	LUSC	5.30949
TCGA-39-5034-01A-01R-1443-07	Dead	1107	LUSC	2.98096
TCGA-39-5035-01A-01R-1443-07	Alive	2080	LUSC	4.62932
TCGA-39-5036-01A-01R-1443-07	Alive	2165	LUSC	2.98408
TCGA-39-5037-01A-01R-1443-07	Alive	1690	LUSC	6.20933
TCGA-39-5039-01A-01R-1443-07	Dead	544	LUSC	2.61278
TCGA-39-5040-01A-21R-2125-07	Dead	519	LUSC	2.21083
TCGA-3A-A9I5-01A-11R-A38C-07	Alive	1794	PAAD	2.87346
TCGA-3A-A9I7-01A-21R-A38C-07	Alive	1323	PAAD	1.8246
TCGA-3A-A9I9-01A-11R-A38C-07	Dead	634	PAAD	3.91638
TCGA-3A-A9IB-01A-21R-A39D-07	Dead	224	PAAD	2.27784
TCGA-3A-A9IC-01A-11R-A38C-07	Dead	738	PAAD	4.14971
TCGA-3A-A9IH-01A-12R-A39D-07	Alive	1021	PAAD	3.90662
TCGA-3A-A9IJ-01A-11R-A39D-07	Alive	1854	PAAD	0.825297
TCGA-3A-A9IL-01A-11R-A38C-07	Alive	2741	PAAD	0.83875
TCGA-3A-A9IN-01A-11R-A39D-07	Alive	2084	PAAD	2.33959
TCGA-3A-A9IO-01A-11R-A38C-07	Alive	1942	PAAD	3.03422
TCGA-3A-A9IR-01A-11R-A38C-07	Alive	1542	PAAD	1.93821
TCGA-3A-A9IS-01A-21R-A39D-07	Alive	998	PAAD	2.96621
TCGA-3A-A9IU-01A-11R-A39D-07	Dead	458	PAAD	3.2758
TCGA-3A-A9IV-01A-11R-A41B-07	Alive	1103	PAAD	3.36466
TCGA-3A-A9IX-01A-11R-A41B-07	Alive	1037	PAAD	2.1107
TCGA-3A-A9IZ-01A-12R-A41B-07	Dead	308	PAAD	4.48081
TCGA-3A-A9J0-01A-11R-A41B-07	Alive	743	PAAD	3.7878
TCGA-3B-A9HI-01A-11R-A38C-07	Alive	1521	SARC	3.10918
TCGA-3B-A9HJ-01A-11R-A38C-07	Alive	1104	SARC	1.06537
TCGA-3B-A9HL-01A-11R-A38C-07	Dead	599	SARC	0.950244
TCGA-3B-A9HO-01A-11R-A38C-07	Alive	959	SARC	1.52887
TCGA-3B-A9HP-01A-11R-A38C-07	Dead	1627	SARC	2.72744
TCGA-3B-A9HQ-01A-11R-A38C-07	Alive	2085	SARC	1.35952
TCGA-3B-A9HR-01A-11R-A38C-07	Dead	2694	SARC	1.08257
TCGA-3B-A9HS-01A-11R-A39D-07	Dead	1366	SARC	2.22512
TCGA-3B-A9HT-01A-11R-A39D-07	Alive	1665	SARC	1.75467
TCGA-3B-A9HU-01A-11R-A39D-07	Alive	768	SARC	1.74825
TCGA-3B-A9HV-01A-11R-A39D-07	Dead	437	SARC	3.68351
TCGA-3B-A9HX-01A-11R-A39D-07	Alive	1303	SARC	3.39883
TCGA-3B-A9HY-01A-11R-A39D-07	Alive	314	SARC	1.31568
TCGA-3B-A9HZ-01A-11R-A39D-07	Alive	1170	SARC	1.93934
TCGA-3B-A9I0-01A-11R-A39D-07	Alive	1096	SARC	1.2383
TCGA-3B-A9I1-01A-11R-A39D-07	Dead	567	SARC	5.06017
TCGA-3B-A9I3-01A-11R-A39D-07	Alive	808	SARC	2.31063
TCGA-3C-AAAU-01A-11R-A41B-07	Alive	4047	BRCA	2.65675
TCGA-3C-AALI-01A-11R-A41B-07	Alive	4005	BRCA	2.82312
TCGA-3C-AALJ-01A-31R-A41B-07	Alive	1474	BRCA	5.9528
TCGA-3C-AALK-01A-11R-A41B-07	Alive	1448	BRCA	4.84279
TCGA-3E-AAAY-01A-11R-A38C-07	Alive	2285	PAAD	3.76618
TCGA-3E-AAAZ-01A-11R-A38C-07	Dead	2182	PAAD	4.78249
TCGA-3G-AB0O-01A-22R-A42C-07	Alive	2086	THYM	1.8102
TCGA-3G-AB0Q-01A-11R-A42C-07	Alive	1799	THYM	1.96993
TCGA-3G-AB0T-01A-11R-A42C-07	Dead	2488	THYM	3.19661
TCGA-3G-AB14-01A-11R-A42C-07	Dead	775	THYM	3.27468
TCGA-3G-AB19-01A-21R-A42C-07	Dead	2910	THYM	1.29072
TCGA-3H-AB3K-01A-11R-A40A-07	Dead	1715	MESO	2.33974
TCGA-3H-AB3L-01A-11R-A40A-07	Dead	361	MESO	2.3307
TCGA-3H-AB3M-01A-11R-A40A-07	Dead	885	MESO	2.07073
TCGA-3H-AB3O-01A-11R-A40A-07	Dead	1302	MESO	0.879392
TCGA-3H-AB3S-01A-21R-A40A-07	Dead	385	MESO	2.12981
TCGA-3H-AB3T-01A-11R-A40A-07	Dead	414	MESO	1.3475
TCGA-3H-AB3U-01A-21R-A40A-07	Dead	826	MESO	1.72303
TCGA-3H-AB3X-01A-11R-A40A-07	Alive	1490	MESO	1.69086
TCGA-3K-AAZ8-01A-12R-A39D-07	Alive	396	LIHC	1.63575
TCGA-3L-AA1B-01A-11R-A37K-07	Alive	475	COAD	3.19229
TCGA-3M-AB46-01A-11R-A414-31	Alive	1765	STAD	3.89303
TCGA-3M-AB47-01A-22R-A414-31	Dead		STAD	1.34795
TCGA-3N-A9WB-06A-11R-A38C-07	Dead	518	SKCM	2.28998
TCGA-3N-A9WC-06A-11R-A38C-07	Alive	2022	SKCM	1.46832
TCGA-3N-A9WD-06A-11R-A38C-07	Dead	395	SKCM	2.2522
TCGA-3Q-A9WF-01A-11R-A42C-07	Alive	467	THYM	1.72875
TCGA-3R-A8YX-01A-11R-A37L-07	Dead	17	SARC	2.15277
TCGA-3S-A8YW-01A-11R-A42C-07	Alive	643	THYM	5.36765
TCGA-3S-AAYX-01A-11R-A42C-07	Alive	571	THYM	1.9449
TCGA-3T-AA9L-01A-11R-A42C-07	Alive	1050	THYM	2.87582
TCGA-3U-A98D-01A-12R-A40A-07	Dead	142	MESO	2.48592
TCGA-3U-A98E-01A-11R-A40A-07	Alive	1916	MESO	0.823831
TCGA-3U-A98F-01A-11R-A40A-07	Dead	536	MESO	3.50196
TCGA-3U-A98G-01A-11R-A40A-07	Dead	630	MESO	1.32843
TCGA-3U-A98H-01A-11R-A40A-07	Dead	1156	MESO	1.26267
TCGA-3U-A98I-01A-11R-A40A-07	Dead	860	MESO	1.82725
TCGA-3U-A98J-01A-11R-A40A-07	Dead	741	MESO	2.43795
TCGA-3X-AAV9-01A-72R-A41I-07	Dead	339	CHOL	2.31371
TCGA-3X-AAVA-01A-11R-A41I-07	Dead	445	CHOL	2.53411
TCGA-3X-AAVB-01A-31R-A41I-07	Alive	402	CHOL	3.84061
TCGA-3X-AAVC-01A-21R-A41I-07	Alive	709	CHOL	1.488
TCGA-3X-AAVE-01A-11R-A41I-07	Alive	650	CHOL	0.807272
TCGA-3Z-A93Z-01A-11R-A37O-07	Alive	385	KIRC	2.58628
TCGA-41-2571-01A-01R-1850-01	Dead	26	GBM	4.22065
TCGA-41-2572-01A-01R-1850-01	Dead	406	GBM	3.23611
TCGA-41-3915-01A-01R-1850-01	Dead	360	GBM	3.10257
TCGA-41-4097-01A-01R-1850-01	Dead	6	GBM	3.1138
TCGA-41-5651-01A-01R-1850-01	Dead	460	GBM	4.33772
TCGA-43-2576-01A-01R-A32Z-07	Alive	1223	LUSC	3.66651
TCGA-43-2578-01A-01R-0851-07	Dead	684	LUSC	2.87346
TCGA-43-2581-01A-01R-0851-07	Alive	1176	LUSC	1.77522
TCGA-43-3394-01A-01R-0980-07	Dead	1190	LUSC	3.9884
TCGA-43-3920-01A-01R-0980-07	Alive	1007	LUSC	3.19488
TCGA-43-5668-01A-01R-1635-07	Dead	559	LUSC	4.8299
TCGA-43-5670-01A-21R-2125-07	Alive	849	LUSC	3.25152
TCGA-43-6143-01A-11R-1820-07	Alive	699	LUSC	3.81833
TCGA-43-6647-01A-11R-1820-07	Alive	757	LUSC	2.61285
TCGA-43-6770-01A-11R-1820-07	Alive	653	LUSC	3.61696
TCGA-43-6771-01A-11R-1820-07	Dead	166	LUSC	3.953
TCGA-43-6773-01A-41R-1949-07	Dead	116	LUSC	2.60502
TCGA-43-7656-01A-11R-2125-07	Alive	596	LUSC	2.84938
TCGA-43-7657-01A-31R-2125-07	Alive	236	LUSC	5.37791
TCGA-43-7658-01A-11R-2125-07	Dead	2378	LUSC	4.59346
TCGA-43-8115-01A-11R-2247-07	Alive	407	LUSC	3.29531
TCGA-43-8116-01A-11R-2247-07	Alive	358	LUSC	1.60431
TCGA-43-8118-01A-11R-2403-07	Dead	89	LUSC	3.09635
TCGA-43-A474-01A-11R-A24H-07	Alive	353	LUSC	5.11633
TCGA-43-A475-01A-11R-A24H-07	Alive	296	LUSC	1.60786
TCGA-43-A56U-01A-11R-A26W-07	Alive	432	LUSC	3.83117
TCGA-43-A56V-01A-11R-A26W-07	Alive	366	LUSC	4.38723
TCGA-44-2655-01A-01R-0946-07	Alive	1324	LUAD	3.07149
TCGA-44-2656-01A-02R-0946-07	Alive	1429	LUAD	2.57529
TCGA-44-2656-01A-02R-A278-07	Alive	1429	LUAD	1.80789
TCGA-44-2656-01B-06R-A277-07	Alive	1429	LUAD	1.17402
TCGA-44-2657-01A-01R-1107-07	Alive	1351	LUAD	1.69706
TCGA-44-2659-01A-01R-0946-07	Alive	1367	LUAD	1.9452
TCGA-44-2661-01A-01R-1107-07	Alive	1159	LUAD	1.47301
TCGA-44-2662-01A-01R-0946-07	Alive	1280	LUAD	3.31195
TCGA-44-2662-01A-01R-A278-07	Alive	1280	LUAD	1.75886
TCGA-44-2662-01B-02R-A277-07	Alive	1280	LUAD	0.95017
TCGA-44-2665-01A-01R-0946-07	Alive	1301	LUAD	3.06324
TCGA-44-2665-01B-06R-A277-07	Alive	1301	LUAD	2.12118
TCGA-44-2666-01A-01R-0946-07	Dead	97	LUAD	1.81094
TCGA-44-2666-01A-01R-A278-07	Dead	97	LUAD	0.493955
TCGA-44-2666-01B-02R-A277-07	Dead	97	LUAD	0.851599
TCGA-44-2668-01A-01R-0946-07	Dead	761	LUAD	2.81141
TCGA-44-2668-01A-01R-A278-07	Dead	761	LUAD	1.37762
TCGA-44-2668-01B-02R-A277-07	Dead	761	LUAD	1.62714
TCGA-44-3396-01A-01R-1206-07	Alive	1130	LUAD	2.00205
TCGA-44-3398-01A-01R-1107-07	Alive	1163	LUAD	2.22743
TCGA-44-3917-01A-01R-A278-07	Alive	1183	LUAD	0.417488
TCGA-44-3917-01B-02R-A277-07	Alive	1183	LUAD	1.18916
TCGA-44-3918-01A-01R-1107-07	Alive	1036	LUAD	3.50578
TCGA-44-3918-01A-01R-A278-07	Alive	1036	LUAD	2.03238
TCGA-44-3918-01B-02R-A277-07	Alive	1036	LUAD	2.02645
TCGA-44-3919-01A-02R-1107-07	Dead	1026	LUAD	2.32225
TCGA-44-4112-01A-01R-1107-07	Dead	808	LUAD	4.23977
TCGA-44-4112-01B-06R-A277-07	Dead	808	LUAD	1.82412
TCGA-44-5643-01A-01R-1628-07	Alive	1013	LUAD	0.928124
TCGA-44-5644-01A-21R-2039-07	Alive	863	LUAD	2.12499
TCGA-44-5645-01A-01R-1628-07	Alive	852	LUAD	1.84716
TCGA-44-5645-01A-01R-A278-07	Alive	852	LUAD	0.723078
TCGA-44-5645-01B-04R-A277-07	Alive	852	LUAD	0.790939
TCGA-44-6145-01A-11R-1755-07	Alive	595	LUAD	1.93206
TCGA-44-6146-01A-11R-1755-07	Alive	728	LUAD	2.06115
TCGA-44-6146-01A-11R-A278-07	Alive	728	LUAD	1.26837
TCGA-44-6146-01B-04R-A277-07	Alive	728	LUAD	1.69822
TCGA-44-6147-01A-11R-1755-07	Alive	845	LUAD	2.95754
TCGA-44-6147-01A-11R-A278-07	Alive	845	LUAD	1.69786
TCGA-44-6147-01B-06R-A277-07	Alive	845	LUAD	1.79535
TCGA-44-6148-01A-11R-1755-07	Alive	704	LUAD	1.22287
TCGA-44-6774-01A-21R-1858-07	Alive	658	LUAD	1.79327
TCGA-44-6775-01A-11R-1858-07	Alive	705	LUAD	2.98291
TCGA-44-6775-01A-11R-A278-07	Alive	705	LUAD	1.83208
TCGA-44-6775-01C-02R-A277-07	Alive	705	LUAD	1.55582
TCGA-44-6776-01A-11R-1858-07	Alive	2616	LUAD	2.97741
TCGA-44-6777-01A-11R-1858-07	Dead	987	LUAD	2.87735
TCGA-44-6778-01A-11R-1858-07	Alive	1864	LUAD	2.30247
TCGA-44-6779-01A-11R-1858-07	Dead	500	LUAD	2.94759
TCGA-44-7659-01A-11R-2066-07	Alive	691	LUAD	1.39769
TCGA-44-7660-01A-11R-2066-07	Alive	592	LUAD	3.4642
TCGA-44-7661-01A-11R-2066-07	Dead	557	LUAD	2.37011
TCGA-44-7662-01A-11R-2066-07	Alive	218	LUAD	3.97288
TCGA-44-7667-01A-31R-2066-07	Alive	1097	LUAD	2.12463
TCGA-44-7669-01A-21R-2066-07	Dead	574	LUAD	1.04614
TCGA-44-7670-01A-11R-2066-07	Alive	882	LUAD	4.9717
TCGA-44-7671-01A-11R-2066-07	Alive	889	LUAD	2.72179
TCGA-44-7672-01A-11R-2066-07	Alive	719	LUAD	1.96181
TCGA-44-8117-01A-11R-2241-07	Alive	385	LUAD	4.88463
TCGA-44-8119-01A-11R-2241-07	Alive	285	LUAD	2.8507
TCGA-44-8120-01A-11R-2241-07	Alive	260	LUAD	2.46772
TCGA-44-A479-01A-31R-A24H-07	Alive	486	LUAD	1.82102
TCGA-44-A47A-01A-21R-A24H-07	Alive	466	LUAD	2.75585
TCGA-44-A47B-01A-11R-A24H-07	Alive	287	LUAD	2.09031
TCGA-44-A47G-01A-21R-A24H-07	Alive	351	LUAD	2.16864
TCGA-44-A4SS-01A-11R-A24X-07	Alive	415	LUAD	1.42229
TCGA-44-A4SU-01A-11R-A24X-07	Dead	409	LUAD	2.67102
TCGA-46-3765-01A-01R-0980-07	Alive	405	LUSC	4.06863
TCGA-46-3766-01A-01R-0980-07	Alive	370	LUSC	2.20417
TCGA-46-3767-01A-01R-0980-07	Alive	396	LUSC	3.41695
TCGA-46-3768-01A-01R-0980-07	Dead	299	LUSC	2.37912
TCGA-46-3769-01A-01R-0980-07	Alive	135	LUSC	1.7427
TCGA-46-6025-01A-11R-1820-07	Alive	324	LUSC	3.16784
TCGA-46-6026-01A-11R-1820-07	Alive	423	LUSC	4.61253
TCGA-49-4486-01A-01R-1206-07	Dead	2318	LUAD	2.4889
TCGA-49-4487-01A-21R-1858-07	Dead	855	LUAD	3.57881
TCGA-49-4488-01A-01R-1755-07	Dead	869	LUAD	3.79606
TCGA-49-4490-01A-21R-1858-07	Dead	385	LUAD	4.47134
TCGA-49-4494-01A-01R-1206-07	Dead	1081	LUAD	2.93981
TCGA-49-4501-01A-01R-1206-07	Dead	1421	LUAD	2.7772
TCGA-49-4505-01A-01R-1206-07	Dead	428	LUAD	3.03497
TCGA-49-4506-01A-01R-1206-07	Dead	999	LUAD	3.16044
TCGA-49-4507-01A-01R-1206-07	Dead	268	LUAD	3.29691
TCGA-49-4510-01A-01R-1206-07	Dead	896	LUAD	3.25426
TCGA-49-4512-01A-21R-1858-07	Dead	905	LUAD	3.95916
TCGA-49-4514-01A-21R-1858-07	Alive	1700	LUAD	2.26478
TCGA-49-6742-01A-11R-1858-07	Dead	488	LUAD	4.48421
TCGA-49-6743-01A-11R-1858-07	Alive	1621	LUAD	3.157
TCGA-49-6744-01A-11R-1858-07	Alive	1683	LUAD	3.10816
TCGA-49-6745-01A-11R-1858-07	Alive	522	LUAD	1.3111
TCGA-49-6761-01A-31R-1949-07	Alive	354	LUAD	3.00635
TCGA-49-6767-01A-11R-1858-07	Alive	677	LUAD	2.65141
TCGA-49-AAQV-01A-11R-A39D-07	Dead	677	LUAD	3.72677
TCGA-49-AAR0-01A-21R-A39D-07	Alive	4765	LUAD	2.03094
TCGA-49-AAR2-01A-11R-A39D-07	Alive	2224	LUAD	3.69393
TCGA-49-AAR3-01A-11R-A41B-07	Alive	1893	LUAD	1.28434
TCGA-49-AAR4-01A-12R-A41B-07	Dead	879	LUAD	1.50503
TCGA-49-AAR9-01A-21R-A41B-07	Dead	260	LUAD	3.82843
TCGA-49-AARE-01A-11R-A41B-07	Dead	1229	LUAD	2.92408
TCGA-49-AARN-01A-21R-A41B-07	Dead	1135	LUAD	4.21905
TCGA-49-AARO-01A-12R-A41B-07	Alive	3759	LUAD	2.93755
TCGA-49-AARQ-01A-11R-A41B-07	Alive	6732	LUAD	2.9715
TCGA-49-AARR-01A-11R-A41B-07	Alive	4992	LUAD	1.14359
TCGA-4A-A93W-01A-11R-A37K-07	Alive	4	KIRP	2.25749
TCGA-4A-A93X-01A-11R-A37K-07	Alive	390	KIRP	0.814099
TCGA-4A-A93Y-01A-11R-A37K-07	Alive	352	KIRP	0.949722
TCGA-4B-A93V-01A-11R-A39D-07	Dead	300	LUAD	3.51272
TCGA-4C-A93U-01A-11R-A39I-07	Alive	129	THCA	1.62134
TCGA-4E-A92E-01A-11R-A37O-07	Alive	13	UCEC	3.13042
TCGA-4G-AAZO-01A-12R-A41I-07	Alive	1177	CHOL	2.04548
TCGA-4G-AAZT-01A-11R-A41I-07	Alive	420	CHOL	2.07868
TCGA-4H-AAAK-01A-12R-A41B-07	Alive	348	BRCA	3.41037
TCGA-4J-AA1J-01A-21R-A38B-07	Alive	542	CESC	5.12799
TCGA-4K-AA1G-01A-11R-A430-07	Alive	436	TGCT	3.75593
TCGA-4K-AA1H-01A-11R-A430-07	Alive	518	TGCT	3.05787
TCGA-4K-AA1I-01A-11R-A430-07	Alive	3	TGCT	3.53116
TCGA-4K-AAAL-01A-11R-A430-07	Alive	483	TGCT	3.8139
TCGA-4L-AA1F-01A-11R-A41O-07	Alive	350	PRAD	3.02144
TCGA-4N-A93T-01A-11R-A37K-07	Alive	146	COAD	6.17269
TCGA-4P-AA8J-01A-11R-A39I-07	Alive	102	HNSC	3.1159
TCGA-4R-AA8I-01A-11R-A38B-07	Dead	262	LIHC	0.771379
TCGA-4T-AA8H-01A-11R-A41B-07	Alive	385	COAD	4.84568
TCGA-4V-A9QI-01A-11R-A42C-07	Alive	2936	THYM	2.93242
TCGA-4V-A9QJ-01A-11R-A42C-07	Alive	2849	THYM	2.46043
TCGA-4V-A9QL-01A-11R-A42C-07	Alive	1908	THYM	2.69931
TCGA-4V-A9QM-01A-11R-A42C-07	Alive	1253	THYM	2.65526
TCGA-4V-A9QN-01A-11R-A42C-07	Alive	970	THYM	7.63124
TCGA-4V-A9QR-01A-11R-A42C-07	Alive	780	THYM	2.85798
TCGA-4V-A9QS-01A-11R-A42C-07	Alive	774	THYM	2.2394
TCGA-4V-A9QT-01A-11R-A42C-07	Alive	813	THYM	1.75583
TCGA-4V-A9QU-01A-11R-A42C-07	Alive	627	THYM	2.792
TCGA-4V-A9QW-01A-11R-A42C-07	Alive	630	THYM	2.48305
TCGA-4V-A9QX-01A-11R-A42C-07	Alive	434	THYM	2.43528
TCGA-4X-A9F9-01A-11R-A42C-07	Alive	669	THYM	2.43576
TCGA-4X-A9FA-01A-11R-A42C-07	Alive	392	THYM	1.72992
TCGA-4X-A9FB-01A-11R-A42C-07	Alive	717	THYM	1.49846
TCGA-4X-A9FC-01A-11R-A42C-07	Alive	2072	THYM	2.60117
TCGA-4X-A9FD-01A-11R-A42C-07	Alive	1503	THYM	5.15531
TCGA-4Z-AA7M-01A-11R-A39I-07	Alive	495	BLCA	2.53042
TCGA-4Z-AA7N-01A-11R-A39I-07	Dead	1367	BLCA	2.56145
TCGA-4Z-AA7O-01A-31R-A39I-07	Alive	512	BLCA	3.51855
TCGA-4Z-AA7Q-01A-11R-A39I-07	Dead	510	BLCA	1.66948
TCGA-4Z-AA7R-01A-11R-A39I-07	Dead	522	BLCA	2.67066
TCGA-4Z-AA7S-01A-11R-A39I-07	Dead	1064	BLCA	3.90306
TCGA-4Z-AA7W-01A-11R-A39I-07	Alive	840	BLCA	2.35361
TCGA-4Z-AA7Y-01A-11R-A39I-07	Alive	1522	BLCA	3.11615
TCGA-4Z-AA80-01A-11R-A39I-07	Dead	19	BLCA	3.45449
TCGA-4Z-AA81-01A-11R-A39I-07	Dead	1270	BLCA	2.54582
TCGA-4Z-AA82-01A-11R-A39I-07	Dead	1556	BLCA	1.62635
TCGA-4Z-AA83-01A-11R-A39I-07	Alive	2024	BLCA	2.35716
TCGA-4Z-AA84-01A-11R-A39I-07	Alive	460	BLCA	3.31796
TCGA-4Z-AA86-01A-11R-A39I-07	Dead	311	BLCA	2.76929
TCGA-4Z-AA87-01A-11R-A39I-07	Alive	1454	BLCA	2.38018
TCGA-4Z-AA89-01A-11R-A39I-07	Alive	1029	BLCA	2.66332
TCGA-50-5044-01A-21R-1858-07	Dead	624	LUAD	2.05384
TCGA-50-5045-01A-01R-1628-07	Dead	2174	LUAD	2.51003
TCGA-50-5049-01A-01R-1628-07	Alive	3094	LUAD	1.55503
TCGA-50-5051-01A-21R-1858-07	Dead	478	LUAD	2.53822
TCGA-50-5055-01A-01R-1628-07	Dead	1830	LUAD	1.95513
TCGA-50-5066-01A-01R-1628-07	Alive	1442	LUAD	2.13333
TCGA-50-5066-02A-11R-2090-07	Alive	1442	LUAD	3.16545
TCGA-50-5068-01A-01R-1628-07	Dead	1499	LUAD	2.59917
TCGA-50-5072-01A-21R-1858-07	Dead	250	LUAD	3.21017
TCGA-50-5930-01A-11R-1755-07	Dead	282	LUAD	4.49348
TCGA-50-5931-01A-11R-1755-07	Dead	434	LUAD	3.16832
TCGA-50-5932-01A-11R-1755-07	Dead	1235	LUAD	2.81256
TCGA-50-5933-01A-11R-1755-07	Dead	2393	LUAD	2.80976
TCGA-50-5935-01A-11R-1755-07	Dead	653	LUAD	3.84844
TCGA-50-5936-01A-11R-1628-07	Dead	257	LUAD	3.0204
TCGA-50-5939-01A-11R-1628-07	Dead	460	LUAD	2.30722
TCGA-50-5941-01A-11R-1755-07	Alive	1474	LUAD	4.19675
TCGA-50-5942-01A-21R-1755-07	Alive	1847	LUAD	1.25332
TCGA-50-5944-01A-11R-1755-07	Alive	1750	LUAD	1.78388
TCGA-50-5946-01A-11R-1755-07	Alive	1617	LUAD	3.94854
TCGA-50-5946-02A-11R-2090-07	Alive	1617	LUAD	3.27163
TCGA-50-6590-01A-12R-1858-07	Dead	1288	LUAD	1.26081
TCGA-50-6591-01A-11R-1755-07	Dead	119	LUAD	3.01584
TCGA-50-6592-01A-11R-1755-07	Dead	777	LUAD	2.67751
TCGA-50-6593-01A-11R-1755-07	Dead	336	LUAD	2.82463
TCGA-50-6594-01A-11R-1755-07	Dead	370	LUAD	2.7371
TCGA-50-6595-01A-12R-1858-07	Dead	189	LUAD	2.28072
TCGA-50-6597-01A-11R-1858-07	Dead	1268	LUAD	3.85966
TCGA-50-6673-01A-11R-1949-07	Dead	22	LUAD	2.68661
TCGA-50-7109-01A-11R-2039-07	Dead	308	LUAD	2.06795
TCGA-50-8457-01A-11R-2326-07	Alive	1125	LUAD	1.84008
TCGA-50-8459-01A-11R-2326-07	Alive	1119	LUAD	3.16528
TCGA-50-8460-01A-11R-2326-07	Alive	829	LUAD	2.86279
TCGA-51-4079-01A-01R-1100-07	Dead	12	LUSC	3.99411
TCGA-51-4080-01A-01R-1100-07	Dead	12	LUSC	2.48011
TCGA-51-4081-01A-01R-1100-07	Alive	911	LUSC	3.63502
TCGA-51-6867-01A-11R-2045-07	Dead	1856	LUSC	3.50916
TCGA-52-7622-01A-11R-2125-07	Alive	862	LUSC	2.84685
TCGA-52-7809-01A-21R-2125-07	Dead	166	LUSC	4.15541
TCGA-52-7810-01A-11R-2125-07	Alive	923	LUSC	4.41491
TCGA-52-7811-01A-11R-2125-07	Dead	266	LUSC	3.94921
TCGA-52-7812-01A-11R-2125-07	Dead	835	LUSC	2.53142
TCGA-53-7624-01A-11R-2066-07	Dead	1043	LUAD	2.78921
TCGA-53-7626-01A-12R-2066-07	Dead	929	LUAD	1.39171
TCGA-53-7813-01A-11R-2170-07	Alive	424	LUAD	2.26315
TCGA-53-A4EZ-01A-12R-A24X-07	Alive	1071	LUAD	2.73407
TCGA-55-1592-01A-01R-0946-07	Dead	701	LUAD	4.72918
TCGA-55-1594-01A-01R-0946-07	Alive	1178	LUAD	1.9318
TCGA-55-1595-01A-01R-0946-07	Alive	1479	LUAD	2.84573
TCGA-55-1596-01A-01R-0946-07	Alive	2065	LUAD	2.93723
TCGA-55-5899-01A-11R-1628-07	Alive	930	LUAD	2.61254
TCGA-55-6543-01A-11R-1755-07	Alive	435	LUAD	2.2643
TCGA-55-6642-01A-11R-1858-07	Alive	2449	LUAD	2.31887
TCGA-55-6712-01A-11R-1858-07	Dead	171	LUAD	2.30638
TCGA-55-6968-01A-11R-1949-07	Dead	1293	LUAD	2.04019
TCGA-55-6969-01A-11R-1949-07	Alive	1239	LUAD	2.57628
TCGA-55-6970-01A-11R-1949-07	Dead	464	LUAD	3.39057
TCGA-55-6971-01A-11R-1949-07	Alive	1400	LUAD	1.97453
TCGA-55-6972-01A-11R-1949-07	Dead	1632	LUAD	2.529
TCGA-55-6975-01A-11R-1949-07	Dead	118	LUAD	3.86652
TCGA-55-6978-01A-11R-1949-07	Dead	176	LUAD	1.47856
TCGA-55-6979-01A-11R-1949-07	Dead	237	LUAD	2.4225
TCGA-55-6980-01A-11R-1949-07	Alive	2109	LUAD	2.59316
TCGA-55-6981-01A-11R-1949-07	Dead	1379	LUAD	2.20423
TCGA-55-6982-01A-11R-1949-07	Dead	995	LUAD	2.06416
TCGA-55-6983-01A-11R-1949-07	Alive	2823	LUAD	2.18485
TCGA-55-6984-01A-11R-1949-07	Dead	760	LUAD	4.40725
TCGA-55-6985-01A-11R-1949-07	Alive	1233	LUAD	3.11779
TCGA-55-6986-01A-11R-1949-07	Alive	3261	LUAD	1.48743
TCGA-55-6987-01A-11R-1949-07	Alive	2137	LUAD	3.11298
TCGA-55-7227-01A-11R-2039-07	Dead	952	LUAD	2.35267
TCGA-55-7281-01A-11R-2039-07	Alive	872	LUAD	3.15476
TCGA-55-7283-01A-11R-2039-07	Alive	609	LUAD	2.3382
TCGA-55-7284-01B-11R-2241-07	Dead	243	LUAD	2.53386
TCGA-55-7570-01A-11R-2039-07	Alive	824	LUAD	3.37266
TCGA-55-7573-01A-11R-2039-07	Alive	487	LUAD	2.58084
TCGA-55-7574-01A-11R-2039-07	Dead	995	LUAD	2.20417
TCGA-55-7576-01A-11R-2066-07	Alive	670	LUAD	3.04782
TCGA-55-7724-01A-11R-2170-07	Alive	705	LUAD	4.08916
TCGA-55-7725-01A-11R-2170-07	Alive	442	LUAD	1.76375
TCGA-55-7726-01A-11R-2170-07	Alive	652	LUAD	2.52115
TCGA-55-7727-01A-11R-2170-07	Alive	119	LUAD	3.31742
TCGA-55-7728-01A-11R-2187-07	Alive	704	LUAD	2.06953
TCGA-55-7815-01A-11R-2170-07	Alive	773	LUAD	2.86509
TCGA-55-7816-01A-11R-2170-07	Dead	468	LUAD	1.56793
TCGA-55-7903-01A-11R-2170-07	Alive	567	LUAD	4.24387
TCGA-55-7907-01A-11R-2170-07	Dead	343	LUAD	2.45909
TCGA-55-7910-01A-11R-2170-07	Alive	1040	LUAD	3.17441
TCGA-55-7911-01A-11R-2170-07	Alive	537	LUAD	1.55351
TCGA-55-7913-01B-11R-2241-07	Dead	561	LUAD	4.21774
TCGA-55-7914-01A-11R-2170-07	Dead	187	LUAD	2.07731
TCGA-55-7994-01A-11R-2187-07	Alive	603	LUAD	3.23449
TCGA-55-7995-01A-11R-2187-07	Alive	889	LUAD	3.15462
TCGA-55-8085-01A-11R-2241-07	Alive	904	LUAD	4.40406
TCGA-55-8087-01A-11R-2241-07	Alive	462	LUAD	2.4729
TCGA-55-8089-01A-11R-2241-07	Dead	702	LUAD	1.79523
TCGA-55-8090-01A-11R-2241-07	Dead	598	LUAD	2.38855
TCGA-55-8091-01A-11R-2241-07	Alive	600	LUAD	2.64386
TCGA-55-8092-01A-11R-2241-07	Dead	154	LUAD	3.52093
TCGA-55-8094-01A-11R-2241-07	Alive	541	LUAD	2.86979
TCGA-55-8096-01A-11R-2241-07	Dead	719	LUAD	2.82607
TCGA-55-8097-01A-11R-2241-07	Alive	476	LUAD	1.66143
TCGA-55-8203-01A-11R-2241-07	Alive	547	LUAD	2.78559
TCGA-55-8204-01A-11R-2241-07	Alive	515	LUAD	2.24604
TCGA-55-8205-01A-11R-2241-07	Alive	599	LUAD	1.28534
TCGA-55-8206-01A-11R-2241-07	Alive	888	LUAD	1.69546
TCGA-55-8207-01A-11R-2241-07	Alive	977	LUAD	1.91142
TCGA-55-8208-01A-11R-2241-07	Alive	674	LUAD	1.97166
TCGA-55-8299-01A-11R-2287-07	Dead	469	LUAD	2.10668
TCGA-55-8301-01A-11R-2287-07	Alive	534	LUAD	3.67024
TCGA-55-8302-01A-11R-2326-07	Alive	478	LUAD	2.3958
TCGA-55-8505-01A-11R-2403-07	Alive	440	LUAD	4.77482
TCGA-55-8506-01A-11R-2403-07	Alive	11	LUAD	6.00591
TCGA-55-8507-01A-11R-2403-07	Alive	418	LUAD	4.2286
TCGA-55-8508-01A-11R-2403-07	Alive	617	LUAD	1.56418
TCGA-55-8510-01A-11R-2403-07	Alive	539	LUAD	2.60542
TCGA-55-8511-01A-11R-2403-07	Alive	552	LUAD	2.75119
TCGA-55-8512-01A-11R-2403-07	Dead	607	LUAD	1.67102
TCGA-55-8513-01A-11R-2403-07	Alive	791	LUAD	1.76553
TCGA-55-8514-01A-11R-2403-07	Alive	520	LUAD	4.78209
TCGA-55-8614-01A-11R-2403-07	Alive	536	LUAD	4.0781
TCGA-55-8615-01A-11R-2403-07	Alive	446	LUAD	1.92281
TCGA-55-8616-01A-11R-2403-07	Alive	48	LUAD	3.84207
TCGA-55-8619-01A-11R-2403-07	Alive	416	LUAD	3.17599
TCGA-55-8620-01A-11R-2403-07	Dead	375	LUAD	3.45331
TCGA-55-8621-01A-11R-2403-07	Alive	515	LUAD	1.55964
TCGA-55-A48X-01A-11R-A24H-07	Alive	689	LUAD	2.28475
TCGA-55-A48Y-01A-11R-A24H-07	Alive	630	LUAD	2.77463
TCGA-55-A48Z-01A-12R-A24X-07	Alive	651	LUAD	4.07886
TCGA-55-A490-01A-11R-A466-07	Dead	99	LUAD	3.0621
TCGA-55-A491-01A-11R-A24H-07	Alive	626	LUAD	3.27981
TCGA-55-A492-01A-11R-A24H-07	Alive	596	LUAD	3.18164
TCGA-55-A493-01A-11R-A24H-07	Alive	28	LUAD	1.87927
TCGA-55-A494-01A-11R-A24X-07	Alive	481	LUAD	2.33136
TCGA-55-A4DF-01A-11R-A24H-07	Dead	614	LUAD	2.90313
TCGA-55-A4DG-01A-11R-A24H-07	Alive	608	LUAD	2.02963
TCGA-55-A57B-01A-12R-A39D-07	Alive	546	LUAD	3.23802
TCGA-56-1622-01A-01R-0692-07	Dead	881	LUSC	2.70162
TCGA-56-5897-01A-11R-1635-07	Alive	378	LUSC	1.9087
TCGA-56-5898-01A-11R-1635-07	Alive	555	LUSC	4.80742
TCGA-56-6545-01A-11R-1820-07	Alive	666	LUSC	2.93768
TCGA-56-6546-01A-11R-1820-07	Alive		LUSC	4.0573
TCGA-56-7221-01A-11R-2045-07	Alive	608	LUSC	5.35125
TCGA-56-7222-01A-11R-2045-07	Dead	562	LUSC	2.66551
TCGA-56-7223-01A-11R-2045-07	Dead	442	LUSC	5.61085
TCGA-56-7579-01A-11R-2045-07	Dead	951	LUSC	5.65254
TCGA-56-7580-01A-11R-2045-07	Alive	925	LUSC	4.17371
TCGA-56-7582-01A-11R-2045-07	Alive	601	LUSC	3.48486
TCGA-56-7730-01A-11R-2125-07	Dead	198	LUSC	4.33002
TCGA-56-7731-01A-11R-2125-07	Dead	3	LUSC	3.09295
TCGA-56-7822-01A-11R-2125-07	Dead	532	LUSC	3.37783
TCGA-56-7823-01B-11R-2247-07	Alive	1011	LUSC	3.80485
TCGA-56-8082-01A-11R-2247-07	Alive	455	LUSC	2.12327
TCGA-56-8083-01A-11R-2247-07	Alive	150	LUSC	4.77478
TCGA-56-8201-01A-11R-2247-07	Dead	397	LUSC	2.26864
TCGA-56-8304-01A-11R-2326-07	Alive	106	LUSC	3.3497
TCGA-56-8305-01A-11R-2296-07	Alive	105	LUSC	4.9456
TCGA-56-8307-01A-11R-2296-07	Alive	818	LUSC	1.6035
TCGA-56-8308-01A-11R-2296-07	Alive	517	LUSC	4.93725
TCGA-56-8309-01A-11R-2296-07	Alive	428	LUSC	2.14192
TCGA-56-8503-01A-11R-2403-07	Alive	41	LUSC	3.01568
TCGA-56-8504-01A-11R-2403-07	Alive	510	LUSC	2.23918
TCGA-56-8622-01A-11R-2403-07	Alive	55	LUSC	6.59322
TCGA-56-8623-01A-11R-A28V-07	Dead	692	LUSC	1.02935
TCGA-56-8624-01A-11R-2403-07	Alive	420	LUSC	6.69735
TCGA-56-8625-01A-11R-2403-07	Dead	315	LUSC	2.69917
TCGA-56-8626-01A-11R-2403-07	Dead	302	LUSC	3.0982
TCGA-56-8628-01A-11R-2403-07	Alive	616	LUSC	3.13532
TCGA-56-8629-01A-11R-2403-07	Alive	481	LUSC	4.27318
TCGA-56-A49D-01A-11R-A24H-07	Alive	637	LUSC	4.1874
TCGA-56-A4BW-01A-11R-A24H-07	Alive	585	LUSC	3.20439
TCGA-56-A4BX-01A-11R-A24H-07	Alive	405	LUSC	5.03271
TCGA-56-A4BY-01A-11R-A24H-07	Dead	543	LUSC	5.29196
TCGA-56-A4ZJ-01A-11R-A262-07	Alive	640	LUSC	3.26245
TCGA-56-A4ZK-01A-11R-A262-07	Alive	570	LUSC	4.73763
TCGA-56-A5DR-01A-11R-A27Q-07	Alive	4	LUSC	3.83186
TCGA-56-A5DS-01A-11R-A27Q-07	Alive	8	LUSC	3.40573
TCGA-56-A62T-01A-11R-A405-07	Alive	440	LUSC	3.81909
TCGA-57-1582-01A-01R-1566-13	Dead	731	OV	3.36704
TCGA-57-1583-01A-01R-1566-13	Dead	346	OV	3.65667
TCGA-57-1584-01A-01R-1566-13	Alive	643	OV	2.82206
TCGA-57-1585-01A-01R-1566-13	Dead	53	OV	3.82662
TCGA-57-1586-01A-02R-1567-13	Alive	679	OV	4.30694
TCGA-57-1993-01A-01R-1568-13	Alive	763	OV	2.43411
TCGA-57-1994-01A-01R-1568-13	Alive	761	OV	3.33279
TCGA-58-8386-01A-11R-2296-07	Dead	1	LUSC	4.02223
TCGA-58-8387-01A-11R-2296-07	Dead	403	LUSC	2.74306
TCGA-58-8388-01A-11R-2326-07	Dead	412	LUSC	4.86412
TCGA-58-8390-01A-11R-2326-07	Alive	911	LUSC	6.10548
TCGA-58-8391-01A-11R-2326-07	Alive	2167	LUSC	4.47493
TCGA-58-8392-01A-11R-2326-07	Dead	501	LUSC	4.45771
TCGA-58-8393-01A-11R-2326-07	Alive	1058	LUSC	2.8907
TCGA-58-A46J-01A-11R-A24H-07	Alive	2589	LUSC	3.56407
TCGA-58-A46K-01A-11R-A24H-07	Dead	1045	LUSC	2.68598
TCGA-58-A46L-01A-11R-A24H-07	Alive	1723	LUSC	4.81909
TCGA-58-A46M-01A-11R-A24H-07	Alive	1072	LUSC	3.75044
TCGA-58-A46N-01A-11R-A24H-07	Alive	910	LUSC	3.8188
TCGA-59-2348-01A-01R-1569-13	Alive	5481	OV	2.40858
TCGA-59-2350-01A-01R-1569-13	Dead	679	OV	2.25951
TCGA-59-2351-01A-01R-1569-13	Alive	3532	OV	1.88014
TCGA-59-2352-01A-01R-1569-13	Dead	286	OV	2.9052
TCGA-59-2354-01A-01R-1569-13	Dead	1046	OV	3.95527
TCGA-59-2355-01A-01R-1569-13	Dead	65	OV	2.72223
TCGA-59-2363-01A-01R-1569-13	Alive	165	OV	3.03161
TCGA-59-A5PD-01A-11R-A406-31	Dead	624	OV	4.8911
TCGA-5B-A90C-01A-11R-A37O-07	Alive	1202	UCEC	4.56498
TCGA-5C-A9VG-01A-11R-A37K-07	Alive	328	LIHC	1.0695
TCGA-5C-A9VH-01A-11R-A37K-07	Alive	322	LIHC	1.25852
TCGA-5C-AAPD-01A-21R-A39D-07	Alive	20	LIHC	2.08325
TCGA-5G-A9ZZ-01A-31R-A42C-07	Alive	835	THYM	2.60897
TCGA-5K-AAAP-01A-11R-A42C-07	Alive	1054	THYM	3.21703
TCGA-5L-AAT0-01A-12R-A41B-07	Alive	1477	BRCA	3.75054
TCGA-5L-AAT1-01A-12R-A41B-07	Alive	1471	BRCA	3.86271
TCGA-5M-AAT4-01A-11R-A41B-07	Dead	49	COAD	5.621
TCGA-5M-AAT6-01A-11R-A41B-07	Dead	290	COAD	3.6067
TCGA-5M-AATE-01A-11R-A41B-07	Alive	1200	COAD	5.09826
TCGA-5N-A9KI-01A-31R-A42T-07	Dead	76	BLCA	4.60924
TCGA-5N-A9KM-01A-11R-A42T-07	Dead	530	BLCA	2.41695
TCGA-5P-A9JU-01A-11R-A42S-07	Alive	373	KIRP	2.13659
TCGA-5P-A9JV-01A-12R-A42S-07	Alive	2043	KIRP	2.43651
TCGA-5P-A9JW-01A-11R-A42S-07	Alive	3241	KIRP	1.36608
TCGA-5P-A9JY-01A-11R-A42S-07	Dead	1508	KIRP	2.68921
TCGA-5P-A9JZ-01A-11R-A42S-07	Alive	2744	KIRP	1.48491
TCGA-5P-A9K0-01A-11R-A42S-07	Alive	677	KIRP	1.30077
TCGA-5P-A9K2-01A-11R-A42S-07	Alive	2392	KIRP	2.45864
TCGA-5P-A9K3-01A-11R-A42S-07	Dead	471	KIRP	0.853517
TCGA-5P-A9K4-01A-11R-A42S-07	Alive	2184	KIRP	2.95343
TCGA-5P-A9K6-01A-11R-A42S-07	Alive	1914	KIRP	1.40174
TCGA-5P-A9K8-01A-11R-A42S-07	Alive	1309	KIRP	1.22823
TCGA-5P-A9K9-01A-11R-A42S-07	Dead	589	KIRP	1.2664
TCGA-5P-A9KA-01A-11R-A42S-07	Alive	395	KIRP	1.16401
TCGA-5P-A9KC-01A-11R-A42S-07	Alive	377	KIRP	1.47649
TCGA-5P-A9KE-01A-11R-A42S-07	Alive	824	KIRP	1.65067
TCGA-5P-A9KF-01A-11R-A42S-07	Alive	845	KIRP	1.95999
TCGA-5P-A9KH-01A-11R-A42S-07	Alive	2051	KIRP	0.317304
TCGA-5R-AA1C-01A-11R-A41C-07	Alive	520	LIHC	1.0706
TCGA-5R-AA1D-01A-11R-A38B-07	Alive	449	LIHC	2.40302
TCGA-5R-AAAM-01A-12R-A41C-07	Dead	46	LIHC	1.29125
TCGA-5S-A9Q8-01A-11R-A40A-07	Alive	313	UCEC	3.59069
TCGA-5T-A9QA-01A-11R-A41B-07	Alive	303	BRCA	2.48944
TCGA-5U-AB0D-01A-11R-A42C-07	Alive	714	THYM	6.28326
TCGA-5U-AB0E-01A-11R-A42C-07	Alive	687	THYM	1.75911
TCGA-5U-AB0F-01A-11R-A42C-07	Alive	459	THYM	2.33285
TCGA-5V-A9RR-01A-11R-A42C-07	Alive	827	THYM	3.28438
TCGA-5X-AA5U-01A-11R-A406-31	Alive	361	OV	3.41926
TCGA-60-2695-01A-01R-0851-07	Alive	642	LUSC	4.65389
TCGA-60-2696-01A-01R-0851-07	Dead	109	LUSC	2.84437
TCGA-60-2697-01A-11R-2125-07	Dead	372	LUSC	1.42078
TCGA-60-2698-01A-01R-0851-07	Dead	311	LUSC	3.47673
TCGA-60-2703-01A-11R-2045-07	Dead	2945	LUSC	3.78058
TCGA-60-2704-01A-11R-2045-07	Dead	1154	LUSC	1.83224
TCGA-60-2706-01A-01R-0851-07	Alive	2820	LUSC	4.93786
TCGA-60-2707-01A-01R-0851-07	Dead	667	LUSC	3.80739
TCGA-60-2708-01A-01R-0851-07	Alive	2447	LUSC	3.54123
TCGA-60-2709-01A-21R-1820-07	Alive	1505	LUSC	2.34959
TCGA-60-2710-01A-01R-0851-07	Alive	2024	LUSC	2.77747
TCGA-60-2711-01A-01R-0851-07	Alive	1260	LUSC	2.56179
TCGA-60-2712-01A-01R-0851-07	Dead	274	LUSC	1.92919
TCGA-60-2713-01A-01R-0851-07	Alive	1731	LUSC	2.25051
TCGA-60-2714-01A-01R-0851-07	Alive	1531	LUSC	3.17262
TCGA-60-2715-01A-01R-0851-07	Dead	1075	LUSC	2.95522
TCGA-60-2716-01A-01R-0851-07	Alive	1475	LUSC	3.36373
TCGA-60-2719-01A-01R-0851-07	Alive	1297	LUSC	2.46929
TCGA-60-2720-01A-01R-0851-07	Alive	97	LUSC	3.50587
TCGA-60-2721-01A-01R-0851-07	Alive	983	LUSC	3.14648
TCGA-60-2722-01A-01R-0851-07	Alive	908	LUSC	5.01256
TCGA-60-2723-01A-01R-0851-07	Alive	1092	LUSC	2.93719
TCGA-60-2724-01A-01R-0851-07	Alive	717	LUSC	3.38377
TCGA-60-2725-01A-01R-1201-07	Alive	816	LUSC	2.10104
TCGA-60-2726-01A-01R-0851-07	Dead	358	LUSC	3.91853
TCGA-61-1721-01A-01R-1569-13	Alive	338	OV	2.31985
TCGA-61-1724-01A-01R-1568-13	Dead	637	OV	3.53047
TCGA-61-1725-01A-01R-1567-13	Alive	956	OV	2.77722
TCGA-61-1728-01A-01R-1568-13	Alive	848	OV	3.35238
TCGA-61-1733-01A-01R-1567-13	Alive	967	OV	4.55313
TCGA-61-1736-01B-01R-1568-13	Dead	1484	OV	1.62644
TCGA-61-1737-01A-01R-1567-13	Alive	1364	OV	3.24522
TCGA-61-1738-01A-01R-1567-13	Dead	1089	OV	2.95715
TCGA-61-1741-01A-02R-1567-13	Dead	1024	OV	3.43253
TCGA-61-1900-01A-01R-1567-13	Alive	176	OV	5.2605
TCGA-61-1907-01A-01R-1567-13	Alive	952	OV	2.32921
TCGA-61-1910-01A-01R-1567-13	Alive	1127	OV	3.13549
TCGA-61-1911-01A-01R-1567-13	Alive	1293	OV	3.57672
TCGA-61-1914-01A-01R-1567-13	Alive	1722	OV	2.67879
TCGA-61-1918-01A-01R-1568-13	Dead	479	OV	2.77568
TCGA-61-1919-01A-01R-1568-13	Dead	1161	OV	2.71411
TCGA-61-1995-01A-01R-1568-13	Alive	61	OV	1.88866
TCGA-61-1998-01A-01R-1568-13	Alive	168	OV	2.62483
TCGA-61-2000-01A-01R-1568-13	Alive	441	OV	2.58029
TCGA-61-2002-01A-01R-1568-13	Alive	547	OV	2.53434
TCGA-61-2003-01A-01R-1568-13	Alive	122	OV	2.75779
TCGA-61-2008-01A-02R-1568-13	Alive	932	OV	4.42791
TCGA-61-2008-02A-01R-1568-13	Alive	932	OV	3.74949
TCGA-61-2009-01A-01R-1568-13	Alive	1212	OV	5.25627
TCGA-61-2012-01A-01R-1568-13	Alive	932	OV	4.03356
TCGA-61-2088-01A-01R-1568-13	Alive	145	OV	2.96122
TCGA-61-2092-01A-01R-1568-13	Alive	1573	OV	3.26069
TCGA-61-2097-01A-02R-1568-13	Alive	1844	OV	3.23886
TCGA-61-2098-01A-01R-1568-13	Alive	1993	OV	5.58164
TCGA-61-2101-01A-01R-1568-13	Dead	1688	OV	4.67158
TCGA-61-2102-01A-01R-1568-13	Dead	197	OV	3.94132
TCGA-61-2104-01A-01R-1568-13	Alive	2338	OV	4.01927
TCGA-61-2109-01A-01R-1568-13	Dead	629	OV	2.41832
TCGA-61-2110-01A-01R-1568-13	Dead	1354	OV	2.72419
TCGA-61-2111-01A-01R-1568-13	Alive	3825	OV	3.12819
TCGA-61-2113-01A-01R-1568-13	Dead	676	OV	3.55051
TCGA-62-8394-01A-11R-2326-07	Dead	139	LUAD	3.53284
TCGA-62-8395-01A-11R-2326-07	Alive	1216	LUAD	2.16392
TCGA-62-8397-01A-11R-2326-07	Alive	1289	LUAD	2.15982
TCGA-62-8398-01A-11R-2326-07	Dead	444	LUAD	2.93074
TCGA-62-8399-01A-21R-2326-07	Alive	2696	LUAD	3.64349
TCGA-62-8402-01A-11R-2326-07	Dead	1498	LUAD	1.87708
TCGA-62-A46O-01A-11R-A24H-07	Dead	1454	LUAD	2.01443
TCGA-62-A46P-01A-11R-A24H-07	Dead	594	LUAD	3.16018
TCGA-62-A46R-01A-11R-A24H-07	Dead	1725	LUAD	2.07881
TCGA-62-A46S-01A-11R-A24H-07	Dead	1653	LUAD	1.77497
TCGA-62-A46U-01A-11R-A24H-07	Alive	2067	LUAD	3.25276
TCGA-62-A46V-01A-11R-A24H-07	Alive	2199	LUAD	3.08689
TCGA-62-A46Y-01A-11R-A24H-07	Dead	414	LUAD	2.30926
TCGA-62-A470-01A-11R-A24H-07	Dead	1194	LUAD	3.17798
TCGA-62-A471-01A-12R-A24H-07	Alive	1246	LUAD	3.95156
TCGA-62-A472-01A-11R-A24H-07	Alive	910	LUAD	2.78404
TCGA-63-5128-01A-01R-1443-07	Dead		LUSC	4.75907
TCGA-63-5131-01A-01R-1443-07	Dead		LUSC	4.1209
TCGA-63-6202-01A-11R-1820-07	Alive	1602	LUSC	2.18688
TCGA-63-7020-01A-11R-1949-07	Alive	2133	LUSC	3.66405
TCGA-63-7021-01A-11R-1949-07	Alive	2142	LUSC	3.85257
TCGA-63-7022-01A-11R-1949-07	Alive	2073	LUSC	2.78651
TCGA-63-7023-01A-11R-1949-07	Alive	1682	LUSC	1.87916
TCGA-63-A5M9-01A-11R-A26W-07	Alive	0	LUSC	3.28783
TCGA-63-A5MB-01A-11R-A26W-07	Alive	3123	LUSC	3.13106
TCGA-63-A5MG-01A-12R-A27Q-07	Alive	2148	LUSC	3.47651
TCGA-63-A5MH-01A-12R-A27Q-07	Alive	2026	LUSC	4.32276
TCGA-63-A5MI-01A-12R-A27Q-07	Alive	1784	LUSC	3.09884
TCGA-63-A5MJ-01A-11R-A27Q-07	Alive	1824	LUSC	3.45713
TCGA-63-A5ML-01A-31R-A27Q-07	Alive	1386	LUSC	2.24489
TCGA-63-A5MM-01A-11R-A26W-07	Dead	456	LUSC	2.65005
TCGA-63-A5MN-01A-22R-A27Q-07	Dead	345	LUSC	1.25671
TCGA-63-A5MP-01A-11R-A26W-07	Alive	769	LUSC	2.2988
TCGA-63-A5MR-01A-31R-A27Q-07	Alive	2716	LUSC	3.84189
TCGA-63-A5MS-01A-11R-A26W-07	Alive	2381	LUSC	3.45087
TCGA-63-A5MT-01A-21R-A26W-07	Alive	498	LUSC	3.49912
TCGA-63-A5MU-01A-11R-A26W-07	Dead		LUSC	4.24595
TCGA-63-A5MV-01A-21R-A26W-07	Alive	1100	LUSC	3.75823
TCGA-63-A5MW-01A-11R-A26W-07	Alive	1639	LUSC	4.39689
TCGA-63-A5MY-01A-11R-A26W-07	Alive	1052	LUSC	5.2584
TCGA-64-1676-01A-01R-0946-07	Alive	1728	LUAD	3.81601
TCGA-64-1677-01A-01R-0946-07	Dead	628	LUAD	2.62028
TCGA-64-1678-01A-01R-0946-07	Alive	1189	LUAD	2.18631
TCGA-64-1679-01A-21R-2066-07	Alive	2488	LUAD	3.63004
TCGA-64-1680-01A-02R-0946-07	Alive	1126	LUAD	2.45146
TCGA-64-1681-01A-11R-2066-07	Dead	1167	LUAD	3.4086
TCGA-64-5774-01A-01R-1628-07	Alive	2676	LUAD	2.24671
TCGA-64-5775-01A-01R-1628-07	Dead	62	LUAD	2.12088
TCGA-64-5778-01A-01R-1628-07	Alive	1305	LUAD	3.49557
TCGA-64-5779-01A-01R-1628-07	Alive	864	LUAD	1.726
TCGA-64-5781-01A-01R-1628-07	Alive	1559	LUAD	3.28352
TCGA-64-5815-01A-01R-1628-07	Alive	866	LUAD	2.75369
TCGA-66-2727-01A-01R-0980-07	Dead	516	LUSC	2.85627
TCGA-66-2734-01A-01R-0980-07	Alive	1311	LUSC	2.94948
TCGA-66-2737-01A-01R-0980-07	Alive	61	LUSC	2.64697
TCGA-66-2742-01A-01R-0980-07	Alive	641	LUSC	4.14845
TCGA-66-2744-01A-01R-0980-07	Alive	30	LUSC	2.14215
TCGA-66-2753-01A-01R-0980-07	Alive	31	LUSC	2.70226
TCGA-66-2754-01A-01R-0980-07	Alive	61	LUSC	0.903887
TCGA-66-2755-01A-01R-0851-07	Alive	28	LUSC	3.02576
TCGA-66-2756-01A-01R-0851-07	Alive	30	LUSC	3.19084
TCGA-66-2757-01A-01R-0851-07	Dead	1338	LUSC	5.74315
TCGA-66-2758-01A-02R-0851-07	Alive	639	LUSC	3.19829
TCGA-66-2759-01A-01R-0851-07	Alive	762	LUSC	3.27705
TCGA-66-2763-01A-01R-0851-07	Alive	30	LUSC	2.96752
TCGA-66-2765-01A-01R-0851-07	Alive	61	LUSC	2.05676
TCGA-66-2766-01A-01R-0851-07	Alive	31	LUSC	3.41404
TCGA-66-2767-01A-01R-0851-07	Alive	61	LUSC	2.47129
TCGA-66-2768-01A-01R-0851-07	Alive	61	LUSC	3.48143
TCGA-66-2769-01A-02R-0851-07	Dead	215	LUSC	3.09594
TCGA-66-2770-01A-01R-0851-07	Alive	700	LUSC	2.81009
TCGA-66-2771-01A-01R-0980-07	Alive	578	LUSC	1.98634
TCGA-66-2773-01A-01R-1201-07	Dead	92	LUSC	2.28795
TCGA-66-2777-01A-01R-1201-07	Alive	61	LUSC	3.39898
TCGA-66-2778-01A-02R-0851-07	Alive	578	LUSC	4.07904
TCGA-66-2780-01A-01R-0851-07	Dead	366	LUSC	3.62292
TCGA-66-2781-01A-01R-0851-07	Alive	121	LUSC	2.95381
TCGA-66-2782-01A-01R-0851-07	Dead	365	LUSC	2.78375
TCGA-66-2783-01A-01R-1201-07	Alive	759	LUSC	3.6464
TCGA-66-2785-01A-01R-0851-07	Alive	60	LUSC	3.77304
TCGA-66-2786-01A-01R-0851-07	Alive	790	LUSC	2.88555
TCGA-66-2787-01A-01R-0980-07	Alive	1217	LUSC	3.14945
TCGA-66-2788-01A-01R-0980-07	Alive	699	LUSC	3.31259
TCGA-66-2789-01A-01R-0980-07	Dead	123	LUSC	3.73901
TCGA-66-2790-01A-01R-0980-07	Alive	699	LUSC	3.98534
TCGA-66-2791-01A-01R-0980-07	Dead	153	LUSC	2.94146
TCGA-66-2792-01A-01R-0980-07	Alive	913	LUSC	3.71144
TCGA-66-2793-01A-01R-1201-07	Dead	306	LUSC	3.13675
TCGA-66-2794-01A-01R-1201-07	Alive	1645	LUSC	2.81338
TCGA-66-2795-01A-02R-0980-07	Alive	122	LUSC	3.87314
TCGA-66-2800-01A-01R-1201-07	Alive	1492	LUSC	4.69899
TCGA-67-3770-01A-01R-0946-07	Alive	610	LUAD	2.88161
TCGA-67-3771-01A-01R-0946-07	Alive	610	LUAD	4.53159
TCGA-67-3772-01A-01R-0946-07	Alive	573	LUAD	2.56803
TCGA-67-3773-01A-01R-0946-07	Alive	427	LUAD	1.4019
TCGA-67-3774-01A-01R-0946-07	Alive	385	LUAD	2.41275
TCGA-67-4679-01B-01R-1755-07	Alive	448	LUAD	1.4754
TCGA-67-6215-01A-11R-1755-07	Alive	174	LUAD	2.93166
TCGA-67-6216-01A-11R-1755-07	Alive	141	LUAD	1.98087
TCGA-67-6217-01A-11R-1755-07	Alive	422	LUAD	2.96538
TCGA-68-7755-01A-11R-2125-07	Alive	83	LUSC	3.71116
TCGA-68-7756-01A-11R-2125-07	Alive	202	LUSC	3.02016
TCGA-68-7757-01B-11R-2296-07	Alive	211	LUSC	3.62476
TCGA-68-8250-01A-11R-2296-07	Alive	244	LUSC	2.87265
TCGA-68-8251-01A-11R-2296-07	Alive	406	LUSC	1.57754
TCGA-68-A59I-01A-11R-A262-07	Alive	492	LUSC	2.81379
TCGA-68-A59J-01A-21R-A26W-07	Alive	448	LUSC	4.23483
TCGA-69-7760-01A-11R-2170-07	Alive	202	LUAD	2.39028
TCGA-69-7761-01A-11R-2170-07	Alive	186	LUAD	1.51733
TCGA-69-7763-01A-11R-2170-07	Alive	690	LUAD	2.92896
TCGA-69-7764-01A-11R-2170-07	Alive	414	LUAD	2.66984
TCGA-69-7765-01A-11R-2170-07	Alive	165	LUAD	3.11263
TCGA-69-7973-01A-11R-2187-07	Alive	230	LUAD	2.05102
TCGA-69-7974-01A-11R-2187-07	Alive	184	LUAD	2.80853
TCGA-69-7978-01A-11R-2187-07	Alive	134	LUAD	2.24592
TCGA-69-7979-01A-11R-2187-07	Alive	408	LUAD	4.22367
TCGA-69-7980-01A-11R-2187-07	Alive	411	LUAD	2.21493
TCGA-69-8253-01A-11R-2287-07	Alive	426	LUAD	3.21182
TCGA-69-8254-01A-11R-2287-07	Alive	409	LUAD	0.757621
TCGA-69-8255-01A-11R-2287-07	Alive	129	LUAD	3.08423
TCGA-69-8453-01A-12R-2326-07	Alive	813	LUAD	1.82965
TCGA-69-A59K-01A-11R-A262-07	Alive	591	LUAD	2.87259
TCGA-6A-AB49-01A-12R-A405-07	Dead		LUSC	3.97785
TCGA-6D-AA2E-01A-11R-A37O-07	Alive	362	KIRC	1.03991
TCGA-70-6722-01A-11R-1820-07	Alive	367	LUSC	1.58222
TCGA-70-6723-01A-11R-1820-07	Alive	375	LUSC	4.19983
TCGA-71-6725-01A-11R-1858-07	Alive	256	LUAD	3.32024
TCGA-71-8520-01A-11R-2403-07	Dead	210	LUAD	3.22041
TCGA-73-4658-01A-01R-1755-07	Dead	1600	LUAD	3.91195
TCGA-73-4659-01A-01R-1206-07	Dead	711	LUAD	1.5675
TCGA-73-4662-01A-01R-1206-07	Alive	2515	LUAD	2.89819
TCGA-73-4666-01A-01R-1206-07	Alive	800	LUAD	2.74065
TCGA-73-4668-01A-01R-1206-07	Alive	467	LUAD	3.1725
TCGA-73-4670-01A-01R-1206-07	Alive	131	LUAD	4.04453
TCGA-73-4675-01A-01R-1206-07	Dead	922	LUAD	3.54763
TCGA-73-4676-01A-01R-1755-07	Dead	281	LUAD	3.82445
TCGA-73-4677-01A-01R-1206-07	Dead	38	LUAD	2.52361
TCGA-73-7498-01A-12R-2187-07	Alive	1189	LUAD	3.80009
TCGA-73-7499-01A-11R-2187-07	Dead	1531	LUAD	3.33775
TCGA-73-A9RS-01A-11R-A41B-07	Dead	340	LUAD	2.69633
TCGA-75-5122-01A-01R-1755-07	Dead		LUAD	1.21481
TCGA-75-5125-01A-01R-1755-07	Dead	2027	LUAD	2.56686
TCGA-75-5126-01A-01R-1755-07	Alive		LUAD	1.70337
TCGA-75-5146-01A-01R-1628-07	Alive	2368	LUAD	2.14323
TCGA-75-5147-01A-01R-1628-07	Alive	1333	LUAD	2.25051
TCGA-75-6203-01A-11R-1755-07	Alive		LUAD	1.25278
TCGA-75-6205-01A-11R-1755-07	Dead		LUAD	1.68975
TCGA-75-6206-01A-11R-1755-07	Alive	2590	LUAD	2.28951
TCGA-75-6207-01A-11R-1755-07	Dead		LUAD	4.08338
TCGA-75-6211-01A-11R-1755-07	Dead		LUAD	3.23396
TCGA-75-6212-01A-11R-1755-07	Dead	1516	LUAD	2.73348
TCGA-75-6214-01A-41R-1949-07	Dead	1115	LUAD	4.18591
TCGA-75-7025-01A-12R-1949-07	Alive	3305	LUAD	2.16816
TCGA-75-7027-01A-11R-1949-07	Alive	3059	LUAD	3.70938
TCGA-75-7030-01A-11R-1949-07	Alive		LUAD	2.68477
TCGA-75-7031-01A-11R-1949-07	Alive		LUAD	1.53032
TCGA-76-4925-01A-01R-1850-01	Dead	146	GBM	2.82132
TCGA-76-4926-01B-01R-1850-01	Dead	138	GBM	3.57073
TCGA-76-4927-01A-01R-1850-01	Dead	535	GBM	2.34127
TCGA-76-4928-01B-01R-1850-01	Dead	94	GBM	2.54181
TCGA-76-4929-01A-01R-1850-01	Dead	111	GBM	4.29794
TCGA-76-4931-01A-01R-1850-01	Dead	279	GBM	3.24613
TCGA-76-4932-01A-01R-1850-01	Dead	1458	GBM	4.07634
TCGA-77-6842-01A-11R-1949-07	Dead	899	LUSC	1.61716
TCGA-77-6843-01A-11R-1949-07	Dead	2224	LUSC	3.64276
TCGA-77-6844-01A-11R-1949-07	Dead	2284	LUSC	2.74541
TCGA-77-6845-01A-11R-1949-07	Dead	708	LUSC	5.4191
TCGA-77-7138-01A-41R-2045-07	Dead	340	LUSC	3.53139
TCGA-77-7139-01A-11R-2045-07	Alive	4261	LUSC	3.84654
TCGA-77-7140-01A-41R-2045-07	Dead	632	LUSC	4.58392
TCGA-77-7141-01A-11R-2045-07	Alive	15	LUSC	4.54834
TCGA-77-7142-01A-11R-2045-07	Alive	2227	LUSC	2.61157
TCGA-77-7335-01A-11R-2045-07	Dead	2133	LUSC	3.09489
TCGA-77-7337-01A-21R-2045-07	Dead	3253	LUSC	3.54535
TCGA-77-7338-01A-11R-2045-07	Dead	5	LUSC	4.67368
TCGA-77-7463-01A-11R-2045-07	Dead	1423	LUSC	4.35012
TCGA-77-7465-01A-11R-2045-07	Alive	990	LUSC	2.765
TCGA-77-8007-01A-11R-2187-07	Dead	198	LUSC	3.89374
TCGA-77-8008-01A-21R-2187-07	Dead	2639	LUSC	3.80453
TCGA-77-8009-01A-11R-2187-07	Dead	1695	LUSC	3.95315
TCGA-77-8128-01A-11R-2247-07	Dead	1150	LUSC	5.17338
TCGA-77-8130-01A-11R-2247-07	Alive	4765	LUSC	4.79896
TCGA-77-8131-01A-11R-2247-07	Dead	383	LUSC	3.61298
TCGA-77-8133-01A-12R-2247-07	Dead	1640	LUSC	3.53032
TCGA-77-8136-01A-11R-2247-07	Dead	1189	LUSC	2.90626
TCGA-77-8138-01A-11R-2247-07	Dead	539	LUSC	2.71035
TCGA-77-8139-01A-11R-2247-07	Alive	3166	LUSC	3.34547
TCGA-77-8140-01A-11R-2247-07	Dead	351	LUSC	2.80834
TCGA-77-8143-01A-11R-2247-07	Dead	803	LUSC	3.78872
TCGA-77-8144-01A-11R-2247-07	Alive	833	LUSC	3.47844
TCGA-77-8145-01A-11R-2247-07	Dead	212	LUSC	4.9331
TCGA-77-8146-01A-11R-2247-07	Alive	3189	LUSC	2.92909
TCGA-77-8148-01A-11R-2247-07	Alive	2023	LUSC	4.19531
TCGA-77-8150-01A-11R-2247-07	Dead	1655	LUSC	2.56864
TCGA-77-8153-01A-11R-2403-07	Alive	1992	LUSC	4.49747
TCGA-77-8154-01A-11R-2247-07	Alive	1841	LUSC	4.40233
TCGA-77-8156-01A-11R-2247-07	Alive	1106	LUSC	3.79526
TCGA-77-A5FZ-01A-31R-A27Q-07	Dead	3838	LUSC	1.00216
TCGA-77-A5G1-01A-11R-A27Q-07	Alive	4026	LUSC	3.2293
TCGA-77-A5G3-01A-31R-A27Q-07	Alive	4570	LUSC	3.66291
TCGA-77-A5G6-01A-11R-A27Q-07	Dead	678	LUSC	4.52576
TCGA-77-A5G7-01B-11R-A27Q-07	Dead	180	LUSC	3.06681
TCGA-77-A5G8-01B-11R-A27Q-07	Alive	1884	LUSC	4.2462
TCGA-77-A5GA-01A-11R-A27Q-07	Alive	1280	LUSC	3.49695
TCGA-77-A5GB-01B-11R-A27Q-07	Dead	937	LUSC	4.86535
TCGA-77-A5GF-01A-21R-A27Q-07	Dead	840	LUSC	3.37223
TCGA-77-A5GH-01A-11R-A27Q-07	Alive	1182	LUSC	1.96761
TCGA-78-7143-01A-11R-2039-07	Dead	4961	LUAD	2.74795
TCGA-78-7145-01A-11R-2039-07	Dead	826	LUAD	2.98956
TCGA-78-7146-01A-11R-2039-07	Dead	173	LUAD	3.40768
TCGA-78-7147-01A-11R-2039-07	Dead	586	LUAD	3.18984
TCGA-78-7148-01A-11R-2039-07	Dead	626	LUAD	2.85565
TCGA-78-7149-01A-11R-2039-07	Alive	3940	LUAD	3.84617
TCGA-78-7150-01A-21R-2039-07	Dead	666	LUAD	5.58296
TCGA-78-7152-01A-11R-2039-07	Dead	1215	LUAD	2.73338
TCGA-78-7153-01A-11R-2039-07	Alive	3635	LUAD	1.59378
TCGA-78-7154-01A-11R-2039-07	Dead	593	LUAD	1.97185
TCGA-78-7155-01A-11R-2039-07	Dead	1171	LUAD	3.97045
TCGA-78-7156-01A-11R-2039-07	Dead	976	LUAD	1.72474
TCGA-78-7158-01A-11R-2039-07	Dead	179	LUAD	2.47257
TCGA-78-7159-01A-11R-2039-07	Alive	1974	LUAD	2.09545
TCGA-78-7160-01A-11R-2039-07	Dead	697	LUAD	2.90762
TCGA-78-7161-01A-11R-2039-07	Dead	291	LUAD	2.22379
TCGA-78-7162-01A-21R-2066-07	Dead	3169	LUAD	1.82916
TCGA-78-7163-01A-12R-2066-07	Alive	7248	LUAD	3.31729
TCGA-78-7166-01A-12R-2066-07	Dead	258	LUAD	4.79129
TCGA-78-7167-01A-11R-2066-07	Dead	2681	LUAD	2.87364
TCGA-78-7220-01A-11R-2039-07	Dead	807	LUAD	1.94931
TCGA-78-7535-01A-11R-2066-07	Dead	949	LUAD	5.83247
TCGA-78-7536-01A-11R-2066-07	Dead	244	LUAD	2.61391
TCGA-78-7537-01A-11R-2066-07	Dead	1622	LUAD	2.23469
TCGA-78-7539-01A-11R-2066-07	Alive	791	LUAD	3.22746
TCGA-78-7540-01A-11R-2066-07	Dead	1197	LUAD	2.80197
TCGA-78-7542-01A-21R-2066-07	Dead	321	LUAD	2.54352
TCGA-78-7633-01A-11R-2066-07	Dead	1528	LUAD	1.70186
TCGA-78-8640-01A-11R-2403-07	Alive	7062	LUAD	4.22892
TCGA-78-8648-01A-11R-2403-07	Dead	1209	LUAD	0.950095
TCGA-78-8655-01A-11R-2403-07	Alive	2360	LUAD	2.19106
TCGA-78-8660-01A-11R-2403-07	Dead	321	LUAD	2.62099
TCGA-78-8662-01A-11R-2403-07	Dead	3361	LUAD	4.25501
TCGA-79-5596-01A-31R-1949-07	Alive		LUSC	4.91954
TCGA-80-5607-01A-31R-1949-07	Alive		LUAD	1.84306
TCGA-80-5608-01A-31R-1949-07	Alive	2832	LUAD	2.16089
TCGA-80-5611-01A-01R-1628-07	Alive	2595	LUAD	4.28453
TCGA-83-5908-01A-21R-2287-07	Alive	824	LUAD	2.42546
TCGA-85-6175-01A-11R-1820-07	Dead	294	LUSC	3.07027
TCGA-85-6560-01A-11R-1820-07	Alive	1259	LUSC	3.46089
TCGA-85-6561-01A-11R-1820-07	Alive	1224	LUSC	3.36481
TCGA-85-6798-01A-11R-1949-07	Dead	195	LUSC	5.54557
TCGA-85-7696-01A-11R-2125-07	Alive	1111	LUSC	4.55897
TCGA-85-7697-01A-11R-2125-07	Alive	1063	LUSC	4.88102
TCGA-85-7698-01A-11R-2125-07	Alive	952	LUSC	4.16956
TCGA-85-7699-01A-11R-2125-07	Dead	1001	LUSC	2.80463
TCGA-85-7710-01A-11R-2125-07	Alive	42	LUSC	4.03576
TCGA-85-7843-01A-11R-2125-07	Alive	35	LUSC	3.13491
TCGA-85-7844-01A-11R-2125-07	Alive	911	LUSC	3.12174
TCGA-85-7950-01A-11R-2187-07	Alive	576	LUSC	2.11483
TCGA-85-8048-01A-11R-2247-07	Alive	765	LUSC	2.16726
TCGA-85-8049-01A-11R-2247-07	Alive	579	LUSC	3.3759
TCGA-85-8052-01A-11R-2247-07	Alive	734	LUSC	4.14351
TCGA-85-8070-01A-11R-2247-07	Alive	960	LUSC	4.70889
TCGA-85-8071-01A-11R-2247-07	Alive	815	LUSC	4.01973
TCGA-85-8072-01A-31R-2247-07	Alive	932	LUSC	4.17471
TCGA-85-8276-01A-11R-2296-07	Alive	1050	LUSC	3.05443
TCGA-85-8277-01A-11R-2296-07	Dead	307	LUSC	3.42113
TCGA-85-8287-01A-11R-2296-07	Dead	23	LUSC	3.6385
TCGA-85-8288-01A-11R-2296-07	Dead	402	LUSC	3.51367
TCGA-85-8350-01A-11R-2296-07	Alive	683	LUSC	3.94506
TCGA-85-8351-01A-11R-2296-07	Alive	510	LUSC	3.66154
TCGA-85-8352-01A-31R-2326-07	Dead	161	LUSC	4.64155
TCGA-85-8353-01A-21R-2296-07	Dead	94	LUSC	3.22423
TCGA-85-8354-01A-31R-2326-07	Alive	995	LUSC	3.74375
TCGA-85-8355-01A-11R-2296-07	Alive	61	LUSC	2.38775
TCGA-85-8479-01A-11R-2326-07	Alive	468	LUSC	6.0778
TCGA-85-8481-01A-11R-2326-07	Dead	236	LUSC	3.23654
TCGA-85-8580-01A-31R-2403-07	Alive	1113	LUSC	5.02583
TCGA-85-8582-01A-21R-2403-07	Alive	1160	LUSC	3.16337
TCGA-85-8584-01A-11R-2403-07	Dead	383	LUSC	1.92048
TCGA-85-8664-01A-11R-2403-07	Dead	550	LUSC	4.29427
TCGA-85-8666-01A-11R-2403-07	Dead	687	LUSC	4.33003
TCGA-85-A4CL-01A-41R-A26W-07	Dead	921	LUSC	4.46081
TCGA-85-A4CN-01A-11R-A24H-07	Alive	1038	LUSC	4.33282
TCGA-85-A4JB-01A-51R-A262-07	Alive	942	LUSC	4.7341
TCGA-85-A4JC-01A-11R-A24Z-07	Dead	604	LUSC	4.52218
TCGA-85-A4PA-01A-11R-A24Z-07	Alive	741	LUSC	1.45454
TCGA-85-A4QQ-01A-41R-A262-07	Dead	927	LUSC	6.39134
TCGA-85-A4QR-01A-11R-A24Z-07	Alive	600	LUSC	3.66165
TCGA-85-A50M-01A-21R-A262-07	Dead	826	LUSC	3.07229
TCGA-85-A50Z-01A-21R-A262-07	Alive	493	LUSC	2.93812
TCGA-85-A510-01A-11R-A26W-07	Alive	482	LUSC	2.17919
TCGA-85-A511-01A-21R-A262-07	Dead	455	LUSC	3.60832
TCGA-85-A512-01A-11R-A26W-07	Alive	465	LUSC	5.11074
TCGA-85-A513-01A-12R-A26W-07	Alive	910	LUSC	1.94156
TCGA-85-A53L-01A-21R-A26W-07	Alive	377	LUSC	4.12377
TCGA-85-A5B5-01A-21R-A26W-07	Alive	111	LUSC	4.68169
TCGA-86-6562-01A-11R-1755-07	Dead	376	LUAD	3.79001
TCGA-86-6851-01A-11R-1949-07	Alive	179	LUAD	1.87476
TCGA-86-7701-01A-11R-2170-07	Alive	947	LUAD	1.79019
TCGA-86-7711-01A-11R-2066-07	Dead	1046	LUAD	2.76243
TCGA-86-7713-01A-11R-2066-07	Alive	1157	LUAD	2.00263
TCGA-86-7714-01A-12R-2170-07	Dead	625	LUAD	2.09734
TCGA-86-7953-01A-11R-2187-07	Alive	997	LUAD	3.36881
TCGA-86-7954-01A-11R-2187-07	Alive	605	LUAD	2.39314
TCGA-86-7955-01A-11R-2187-07	Alive	1072	LUAD	4.97873
TCGA-86-8054-01A-11R-2241-07	Alive	1148	LUAD	1.90681
TCGA-86-8055-01A-11R-2241-07	Dead	124	LUAD	3.33929
TCGA-86-8056-01A-11R-2241-07	Alive	139	LUAD	2.10202
TCGA-86-8073-01A-11R-2241-07	Alive	740	LUAD	2.61779
TCGA-86-8074-01A-11R-2241-07	Alive	24	LUAD	3.62814
TCGA-86-8075-01A-11R-2241-07	Dead	694	LUAD	3.15452
TCGA-86-8076-01A-31R-2241-07	Alive	993	LUAD	2.79579
TCGA-86-8278-01A-11R-2287-07	Alive	944	LUAD	1.84976
TCGA-86-8279-01A-11R-2287-07	Alive	949	LUAD	4.6012
TCGA-86-8280-01A-11R-2287-07	Alive	701	LUAD	3.65887
TCGA-86-8281-01A-11R-2287-07	Alive	0	LUAD	3.37092
TCGA-86-8358-01A-11R-2326-07	Alive	653	LUAD	3.18927
TCGA-86-8359-01A-11R-2326-07	Dead	444	LUAD	2.97657
TCGA-86-8585-01A-11R-2403-07	Alive	353	LUAD	4.43006
TCGA-86-8668-01A-11R-2403-07	Alive	423	LUAD	2.58434
TCGA-86-8669-01A-11R-2403-07	Alive	938	LUAD	1.73075
TCGA-86-8671-01A-11R-2403-07	Alive	839	LUAD	1.79298
TCGA-86-8672-01A-21R-2403-07	Dead	19	LUAD	2.55326
TCGA-86-8673-01A-11R-2403-07	Alive	862	LUAD	4.63747
TCGA-86-8674-01A-21R-2403-07	Alive	806	LUAD	3.65716
TCGA-86-A456-01A-11R-A24H-07	Alive	896	LUAD	2.46462
TCGA-86-A4D0-01A-11R-A24H-07	Dead	116	LUAD	2.36008
TCGA-86-A4JF-01A-11R-A24X-07	Dead	737	LUAD	3.17771
TCGA-86-A4P7-01A-11R-A24X-07	Alive	415	LUAD	3.1731
TCGA-86-A4P8-01A-11R-A24X-07	Alive	805	LUAD	1.15543
TCGA-90-6837-01A-11R-1949-07	Alive	758	LUSC	4.02712
TCGA-90-7766-01A-21R-2125-07	Alive	289	LUSC	1.67297
TCGA-90-7767-01A-11R-2125-07	Alive	89	LUSC	3.28283
TCGA-90-7769-01A-11R-2125-07	Alive	358	LUSC	4.08326
TCGA-90-7964-01A-21R-2187-07	Alive	428	LUSC	3.45864
TCGA-90-A4ED-01A-31R-A24Z-07	Alive	615	LUSC	6.21627
TCGA-90-A4EE-01A-11R-A24Z-07	Alive	688	LUSC	2.58907
TCGA-90-A59Q-01A-11R-A26W-07	Dead	322	LUSC	4.31887
TCGA-91-6828-01A-11R-1858-07	Alive	323	LUAD	1.14666
TCGA-91-6829-01A-21R-1858-07	Dead	1258	LUAD	2.79029
TCGA-91-6830-01A-11R-1949-07	Alive	60	LUAD	2.84808
TCGA-91-6831-01A-11R-1858-07	Alive	310	LUAD	2.40286
TCGA-91-6835-01A-11R-1858-07	Alive	79	LUAD	2.91852
TCGA-91-6836-01A-21R-1858-07	Alive	417	LUAD	4.91985
TCGA-91-6840-01A-11R-1949-07	Alive	372	LUAD	2.02176
TCGA-91-6847-01A-11R-1949-07	Alive	842	LUAD	2.63155
TCGA-91-6848-01A-11R-1949-07	Alive	224	LUAD	1.82965
TCGA-91-6849-01A-11R-1949-07	Alive	35	LUAD	2.50957
TCGA-91-7771-01A-11R-2170-07	Alive	492	LUAD	1.88772
TCGA-91-8496-01A-11R-2403-07	Alive	505	LUAD	2.43683
TCGA-91-8497-01A-11R-2403-07	Dead	434	LUAD	2.42554
TCGA-91-8499-01A-11R-2403-07	Alive	36	LUAD	4.39881
TCGA-91-A4BC-01A-11R-A24H-07	Alive	44	LUAD	2.14176
TCGA-91-A4BD-01A-11R-A24H-07	Alive	603	LUAD	1.67523
TCGA-92-7340-01A-21R-2045-07	Alive	82	LUSC	3.10973
TCGA-92-7341-01A-31R-2045-07	Alive	106	LUSC	4.09728
TCGA-92-8063-01A-11R-2247-07	Alive	122	LUSC	4.33676
TCGA-92-8064-01A-11R-2247-07	Alive	160	LUSC	2.78835
TCGA-92-8065-01A-11R-2247-07	Alive	70	LUSC	4.71903
TCGA-93-7347-01A-11R-2187-07	Alive	683	LUAD	1.80707
TCGA-93-7348-01A-21R-2039-07	Alive	531	LUAD	3.16042
TCGA-93-8067-01A-11R-2287-07	Alive	186	LUAD	2.24568
TCGA-93-A4JN-01A-11R-A24X-07	Alive	718	LUAD	1.77699
TCGA-93-A4JO-01A-21R-A24X-07	Dead	33	LUAD	2.41438
TCGA-93-A4JP-01A-11R-A24X-07	Alive	578	LUAD	2.69084
TCGA-93-A4JQ-01A-11R-A24X-07	Alive	526	LUAD	1.76727
TCGA-94-7033-01A-11R-1949-07	Alive	640	LUSC	3.70546
TCGA-94-7557-01A-11R-2125-07	Dead	5	LUSC	3.46129
TCGA-94-7943-01A-11R-2187-07	Alive	559	LUSC	2.24144
TCGA-94-8035-01A-11R-2247-07	Alive	122	LUSC	4.97845
TCGA-94-8490-01A-11R-2326-07	Alive	153	LUSC	5.21271
TCGA-94-8491-01A-11R-2326-07	Alive	810	LUSC	3.22985
TCGA-94-A4VJ-01A-11R-A24Z-07	Alive	430	LUSC	4.28866
TCGA-94-A5I4-01A-11R-A26W-07	Alive	491	LUSC	3.81121
TCGA-94-A5I6-01A-21R-A27Q-07	Alive	538	LUSC	4.30133
TCGA-95-7039-01A-11R-1949-07	Alive	1272	LUAD	2.9324
TCGA-95-7043-01A-11R-1949-07	Dead	503	LUAD	2.30141
TCGA-95-7562-01A-11R-2241-07	Dead	87	LUAD	4.01787
TCGA-95-7567-01A-11R-2066-07	Alive	568	LUAD	3.12287
TCGA-95-7944-01A-11R-2187-07	Alive	377	LUAD	3.05122
TCGA-95-7947-01A-11R-2187-07	Alive	477	LUAD	2.72731
TCGA-95-7948-01A-11R-2187-07	Alive	476	LUAD	2.58722
TCGA-95-8039-01A-11R-2241-07	Alive	830	LUAD	1.6469
TCGA-95-8494-01A-11R-2326-07	Alive	84	LUAD	2.95583
TCGA-95-A4VK-01A-11R-A262-07	Alive	651	LUAD	3.50022
TCGA-95-A4VN-01A-11R-A262-07	Alive	553	LUAD	2.30973
TCGA-95-A4VP-01A-21R-A262-07	Alive	605	LUAD	2.2725
TCGA-96-7544-01A-11R-2045-07	Dead	2160	LUSC	2.29045
TCGA-96-7545-01A-21R-2045-07	Dead	1736	LUSC	3.62672
TCGA-96-8169-01A-11R-2296-07	Alive	557	LUSC	2.75858
TCGA-96-8170-01A-11R-2296-07	Alive	531	LUSC	3.55556
TCGA-96-A4JK-01A-11R-A24Z-07	Alive	589	LUSC	3.79899
TCGA-96-A4JL-01A-11R-A24Z-07	Alive	842	LUSC	2.67385
TCGA-97-7546-01A-11R-2039-07	Alive	1285	LUAD	2.11313
TCGA-97-7547-01A-11R-2039-07	Alive	1965	LUAD	1.96536
TCGA-97-7552-01A-11R-2039-07	Alive	1932	LUAD	1.08984
TCGA-97-7553-01A-21R-2039-07	Alive	1870	LUAD	1.62368
TCGA-97-7554-01A-11R-2039-07	Alive	775	LUAD	2.65037
TCGA-97-7937-01A-11R-2170-07	Alive	564	LUAD	3.95076
TCGA-97-7938-01A-11R-2170-07	Dead	18	LUAD	1.04117
TCGA-97-7941-01A-11R-2187-07	Alive	484	LUAD	3.00592
TCGA-97-8171-01A-11R-2287-07	Alive	568	LUAD	5.41242
TCGA-97-8172-01A-11R-2287-07	Alive	545	LUAD	1.82448
TCGA-97-8174-01A-11R-2287-07	Dead	164	LUAD	1.71581
TCGA-97-8175-01A-11R-2287-07	Alive	551	LUAD	3.39233
TCGA-97-8176-01A-11R-2403-07	Dead	468	LUAD	2.18168
TCGA-97-8177-01A-11R-2287-07	Alive	499	LUAD	3.11992
TCGA-97-8179-01A-11R-2287-07	Alive	435	LUAD	3.34704
TCGA-97-8547-01A-11R-2403-07	Alive	657	LUAD	2.48101
TCGA-97-8552-01A-11R-2403-07	Alive	626	LUAD	1.71211
TCGA-97-A4LX-01A-11R-A24X-07	Alive	614	LUAD	2.02974
TCGA-97-A4M0-01A-11R-A24X-07	Alive	652	LUAD	2.10618
TCGA-97-A4M1-01A-11R-A24X-07	Alive	601	LUAD	2.80554
TCGA-97-A4M2-01A-12R-A24X-07	Alive	624	LUAD	1.96392
TCGA-97-A4M3-01A-11R-A24X-07	Alive	540	LUAD	2.64476
TCGA-97-A4M5-01A-11R-A24X-07	Alive	634	LUAD	2.36608
TCGA-97-A4M6-01A-11R-A24X-07	Alive	568	LUAD	2.97973
TCGA-97-A4M7-01A-11R-A24X-07	Alive	629	LUAD	1.74627
TCGA-98-7454-01A-11R-2045-07	Alive	652	LUSC	2.93533
TCGA-98-8020-01A-11R-2247-07	Dead	84	LUSC	3.7411
TCGA-98-8021-01A-11R-2247-07	Alive	937	LUSC	4.04681
TCGA-98-8022-01A-11R-2247-07	Dead	933	LUSC	3.26143
TCGA-98-8023-01A-11R-2247-07	Alive	649	LUSC	2.26252
TCGA-98-A538-01A-11R-A262-07	Alive	826	LUSC	4.30357
TCGA-98-A539-01A-31R-A262-07	Alive	173	LUSC	3.24472
TCGA-98-A53A-01A-11R-A262-07	Dead	552	LUSC	4.00604
TCGA-98-A53B-01A-11R-A262-07	Dead	61	LUSC	3.01767
TCGA-98-A53C-01A-11R-A262-07	Alive	822	LUSC	1.35298
TCGA-98-A53D-01A-32R-A262-07	Dead	645	LUSC	0.811635
TCGA-98-A53H-01A-12R-A262-07	Alive	618	LUSC	2.04914
TCGA-98-A53I-01A-31R-A262-07	Alive	565	LUSC	2.76009
TCGA-98-A53J-01A-11R-A26W-07	Alive	630	LUSC	4.05708
TCGA-99-7458-01A-11R-2039-07	Alive	747	LUAD	2.55694
TCGA-99-8025-01A-11R-2241-07	Alive	1060	LUAD	4.16462
TCGA-99-8028-01A-11R-2241-07	Alive	1118	LUAD	1.99993
TCGA-99-8032-01A-11R-2241-07	Alive	44	LUAD	1.50274
TCGA-99-8033-01A-11R-2241-07	Dead	656	LUAD	4.38209
TCGA-99-AA5R-01A-11R-A39D-07	Alive	658	LUAD	1.67224
TCGA-A1-A0SB-01A-11R-A144-07	Alive	259	BRCA	4.9265
TCGA-A1-A0SD-01A-11R-A115-07	Alive	437	BRCA	3.85033
TCGA-A1-A0SE-01A-11R-A084-07	Alive	1321	BRCA	3.44545
TCGA-A1-A0SF-01A-11R-A144-07	Alive	1463	BRCA	4.50463
TCGA-A1-A0SG-01A-11R-A144-07	Alive	434	BRCA	5.04005
TCGA-A1-A0SH-01A-11R-A084-07	Alive	1437	BRCA	2.79367
TCGA-A1-A0SI-01A-11R-A144-07	Alive	635	BRCA	6.54765
TCGA-A1-A0SJ-01A-11R-A084-07	Alive	416	BRCA	2.50404
TCGA-A1-A0SK-01A-12R-A084-07	Dead	967	BRCA	5.54248
TCGA-A1-A0SN-01A-11R-A144-07	Alive	1196	BRCA	2.96933
TCGA-A1-A0SO-01A-22R-A084-07	Alive	852	BRCA	2.31417
TCGA-A1-A0SP-01A-11R-A084-07	Alive	584	BRCA	3.56976
TCGA-A1-A0SQ-01A-21R-A144-07	Alive	554	BRCA	2.95062
TCGA-A2-A04N-01A-11R-A115-07	Alive	4354	BRCA	4.7373
TCGA-A2-A04P-01A-31R-A034-07	Dead	548	BRCA	6.20101
TCGA-A2-A04Q-01A-21R-A034-07	Alive	2385	BRCA	4.08027
TCGA-A2-A04R-01A-41R-A109-07	Alive	3709	BRCA	3.28565
TCGA-A2-A04T-01A-21R-A034-07	Alive	2246	BRCA	5.51774
TCGA-A2-A04U-01A-11R-A115-07	Alive	2654	BRCA	5.29616
TCGA-A2-A04V-01A-21R-A034-07	Dead	1920	BRCA	2.06557
TCGA-A2-A04W-01A-31R-A115-07	Alive	3102	BRCA	4.83253
TCGA-A2-A04X-01A-21R-A034-07	Alive	1686	BRCA	4.46271
TCGA-A2-A04Y-01A-21R-A034-07	Alive	1099	BRCA	4.74782
TCGA-A2-A0CK-01A-11R-A22K-07	Alive	4159	BRCA	3.0943
TCGA-A2-A0CL-01A-11R-A115-07	Alive	3015	BRCA	3.24077
TCGA-A2-A0CM-01A-31R-A034-07	Dead	754	BRCA	4.89825
TCGA-A2-A0CO-01A-13R-A22K-07	Dead	3492	BRCA	2.93834
TCGA-A2-A0CP-01A-11R-A034-07	Alive	2813	BRCA	4.77816
TCGA-A2-A0CQ-01A-21R-A034-07	Alive	2695	BRCA	4.4782
TCGA-A2-A0CR-01A-11R-A22K-07	Alive	3283	BRCA	2.84238
TCGA-A2-A0CS-01A-11R-A115-07	Dead	2348	BRCA	6.10883
TCGA-A2-A0CT-01A-31R-A056-07	Alive	2289	BRCA	2.43534
TCGA-A2-A0CU-01A-12R-A034-07	Dead	158	BRCA	2.41286
TCGA-A2-A0CV-01A-31R-A115-07	Alive	3011	BRCA	3.41977
TCGA-A2-A0CW-01A-21R-A115-07	Alive	3283	BRCA	6.1976
TCGA-A2-A0CX-01A-21R-A00Z-07	Alive	1728	BRCA	6.83407
TCGA-A2-A0CY-01A-12R-A034-07	Alive	1673	BRCA	4.05089
TCGA-A2-A0CZ-01A-11R-A034-07	Alive	1616	BRCA	2.25988
TCGA-A2-A0D0-01A-11R-A00Z-07	Alive	2048	BRCA	3.96377
TCGA-A2-A0D1-01A-11R-A034-07	Alive	1051	BRCA	4.66778
TCGA-A2-A0D2-01A-21R-A034-07	Alive	1027	BRCA	2.7773
TCGA-A2-A0D3-01A-11R-A115-07	Alive	1873	BRCA	6.19003
TCGA-A2-A0D4-01A-11R-A00Z-07	Alive	767	BRCA	3.17124
TCGA-A2-A0EM-01A-11R-A034-07	Alive	3094	BRCA	4.72932
TCGA-A2-A0EN-01A-13R-A084-07	Alive	4088	BRCA	2.22565
TCGA-A2-A0EO-01A-11R-A034-07	Alive	2442	BRCA	3.63308
TCGA-A2-A0EP-01A-52R-A22U-07	Alive	3603	BRCA	2.88854
TCGA-A2-A0EQ-01A-11R-A034-07	Alive	2426	BRCA	4.53783
TCGA-A2-A0ER-01A-21R-A034-07	Alive	2263	BRCA	1.75924
TCGA-A2-A0ES-01A-11R-A115-07	Alive	2190	BRCA	3.05655
TCGA-A2-A0ET-01A-31R-A034-07	Alive	1066	BRCA	2.40237
TCGA-A2-A0EU-01A-22R-A056-07	Alive	1043	BRCA	3.00621
TCGA-A2-A0EV-01A-11R-A034-07	Alive	968	BRCA	2.56504
TCGA-A2-A0EW-01A-21R-A115-07	Dead	1884	BRCA	3.07435
TCGA-A2-A0EX-01A-21R-A034-07	Alive	752	BRCA	3.33255
TCGA-A2-A0EY-01A-11R-A034-07	Alive	1925	BRCA	6.20041
TCGA-A2-A0ST-01A-12R-A084-07	Alive	3017	BRCA	2.52311
TCGA-A2-A0SU-01A-11R-A084-07	Alive	1662	BRCA	3.51733
TCGA-A2-A0SV-01A-11R-A084-07	Dead	825	BRCA	3.36718
TCGA-A2-A0SW-01A-11R-A084-07	Dead	1365	BRCA	5.62643
TCGA-A2-A0SX-01A-12R-A084-07	Alive	1534	BRCA	4.2424
TCGA-A2-A0SY-01A-31R-A084-07	Alive	1347	BRCA	2.39048
TCGA-A2-A0T0-01A-22R-A084-07	Alive	533	BRCA	5.74998
TCGA-A2-A0T1-01A-21R-A084-07	Alive	521	BRCA	4.06151
TCGA-A2-A0T2-01A-11R-A084-07	Dead	255	BRCA	5.17659
TCGA-A2-A0T3-01A-21R-A115-07	Alive	1516	BRCA	2.90722
TCGA-A2-A0T4-01A-31R-A084-07	Alive	624	BRCA	2.83019
TCGA-A2-A0T5-01A-21R-A084-07	Alive	531	BRCA	4.67085
TCGA-A2-A0T6-01A-11R-A084-07	Alive	575	BRCA	2.69466
TCGA-A2-A0T7-01A-21R-A084-07	Alive	631	BRCA	4.19208
TCGA-A2-A0YC-01A-11R-A109-07	Alive	990	BRCA	4.81486
TCGA-A2-A0YD-01A-11R-A109-07	Alive	769	BRCA	3.6658
TCGA-A2-A0YE-01A-11R-A109-07	Alive	554	BRCA	4.65601
TCGA-A2-A0YF-01A-21R-A109-07	Alive	1535	BRCA	3.6067
TCGA-A2-A0YG-01A-21R-A109-07	Alive	666	BRCA	6.86891
TCGA-A2-A0YH-01A-11R-A109-07	Alive	659	BRCA	3.76091
TCGA-A2-A0YI-01A-31R-A10J-07	Alive	1505	BRCA	2.40847
TCGA-A2-A0YJ-01A-11R-A109-07	Alive	566	BRCA	5.97412
TCGA-A2-A0YK-01A-22R-A109-07	Alive	588	BRCA	4.82085
TCGA-A2-A0YL-01A-21R-A109-07	Alive	1474	BRCA	3.58109
TCGA-A2-A0YM-01A-11R-A109-07	Alive	965	BRCA	2.78858
TCGA-A2-A1FV-01A-11R-A13Q-07	Alive	714	BRCA	0.993711
TCGA-A2-A1FW-01A-11R-A13Q-07	Alive	528	BRCA	3.09063
TCGA-A2-A1FX-01A-11R-A13Q-07	Alive	1847	BRCA	3.10313
TCGA-A2-A1FZ-01A-51R-A14D-07	Alive	683	BRCA	4.07787
TCGA-A2-A1G0-01A-11R-A13Q-07	Alive	616	BRCA	4.0055
TCGA-A2-A1G1-01A-21R-A13Q-07	Alive	584	BRCA	2.03643
TCGA-A2-A1G4-01A-11R-A13Q-07	Alive	595	BRCA	1.16202
TCGA-A2-A1G6-01A-11R-A13Q-07	Alive	501	BRCA	2.88848
TCGA-A2-A259-01A-11R-A16F-07	Alive	1596	BRCA	3.34389
TCGA-A2-A25A-01A-12R-A16F-07	Alive	3276	BRCA	4.28619
TCGA-A2-A25B-01A-11R-A169-07	Alive	1291	BRCA	2.53099
TCGA-A2-A25C-01A-11R-A169-07	Alive	523	BRCA	3.587
TCGA-A2-A25D-01A-12R-A16F-07	Alive	552	BRCA	3.56515
TCGA-A2-A25E-01A-11R-A169-07	Alive	3204	BRCA	3.39276
TCGA-A2-A25F-01A-11R-A169-07	Alive	322	BRCA	1.56769
TCGA-A2-A3KC-01A-11R-A213-07	Alive	1102	BRCA	3.36706
TCGA-A2-A3KD-01A-12R-A213-07	Alive	1206	BRCA	3.01783
TCGA-A2-A3XS-01A-11R-A22U-07	Dead	1032	BRCA	5.15687
TCGA-A2-A3XT-01A-11R-A22U-07	Alive	2770	BRCA	4.34297
TCGA-A2-A3XU-01A-12R-A22U-07	Dead	912	BRCA	7.16455
TCGA-A2-A3XV-01A-21R-A239-07	Alive	996	BRCA	6.086
TCGA-A2-A3XW-01A-11R-A239-07	Alive	1712	BRCA	5.88574
TCGA-A2-A3XX-01A-21R-A239-07	Dead	1439	BRCA	5.98706
TCGA-A2-A3XY-01A-11R-A239-07	Dead	1093	BRCA	5.1889
TCGA-A2-A3XZ-01A-42R-A239-07	Alive	1532	BRCA	2.77587
TCGA-A2-A3Y0-01A-11R-A239-07	Alive	1546	BRCA	5.18533
TCGA-A2-A4RW-01A-21R-A266-07	Alive	222	BRCA	3.74965
TCGA-A2-A4RX-01A-11R-A266-07	Alive	742	BRCA	4.5405
TCGA-A2-A4RY-01A-31R-A266-07	Alive	648	BRCA	3.56789
TCGA-A2-A4S0-01A-21R-A266-07	Alive	706	BRCA	2.66501
TCGA-A2-A4S1-01A-21R-A266-07	Alive	820	BRCA	2.16195
TCGA-A2-A4S2-01A-12R-A266-07	Alive	643	BRCA	3.33574
TCGA-A2-A4S3-01A-21R-A266-07	Alive	666	BRCA	4.05339
TCGA-A3-3306-01A-01R-0864-07	Alive	1120	KIRC	3.80352
TCGA-A3-3307-01A-01R-0864-07	Alive	1436	KIRC	1.77028
TCGA-A3-3308-01A-02R-1325-07	Alive	16	KIRC	2.14039
TCGA-A3-3311-01A-02R-1325-07	Dead	1191	KIRC	1.97332
TCGA-A3-3313-01A-02R-1325-07	Dead	735	KIRC	0.501719
TCGA-A3-3316-01A-01R-0864-07	Alive	1493	KIRC	3.05702
TCGA-A3-3317-01A-02R-1325-07	Alive	1491	KIRC	1.26766
TCGA-A3-3319-01A-02R-1325-07	Alive	1130	KIRC	3.09876
TCGA-A3-3320-01A-02R-1325-07	Alive	1508	KIRC	2.23202
TCGA-A3-3322-01A-02R-1325-07	Alive	1478	KIRC	2.70604
TCGA-A3-3323-01A-02R-1325-07	Alive	1106	KIRC	3.41522
TCGA-A3-3324-01A-02R-1325-07	Alive	1186	KIRC	2.58345
TCGA-A3-3325-01A-01R-0864-07	Dead	1170	KIRC	1.98463
TCGA-A3-3326-01A-01R-0864-07	Alive	1137	KIRC	2.43018
TCGA-A3-3328-01A-01R-0864-07	Alive	1385	KIRC	0.643579
TCGA-A3-3329-01A-01R-0864-07	Alive	1624	KIRC	2.16919
TCGA-A3-3331-01A-02R-1325-07	Alive	1485	KIRC	2.09011
TCGA-A3-3335-01A-01R-0864-07	Alive	1886	KIRC	3.75042
TCGA-A3-3343-01A-01R-0864-07	Alive	945	KIRC	3.46347
TCGA-A3-3346-01A-01R-1766-07	Dead	137	KIRC	3.73485
TCGA-A3-3347-01A-02R-1325-07	Dead	1610	KIRC	2.39797
TCGA-A3-3349-01A-01R-1188-07	Alive	1385	KIRC	2.67324
TCGA-A3-3351-01A-02R-1325-07	Alive	910	KIRC	2.52457
TCGA-A3-3352-01A-01R-0864-07	Dead	561	KIRC	2.34803
TCGA-A3-3357-01A-02R-1420-07	Alive	2688	KIRC	1.70408
TCGA-A3-3358-01A-01R-1541-07	Alive	1307	KIRC	1.7233
TCGA-A3-3359-01A-01R-0864-07	Alive	2504	KIRC	1.81172
TCGA-A3-3362-01A-02R-1325-07	Alive	1559	KIRC	2.34415
TCGA-A3-3363-01A-01R-0864-07	Alive	319	KIRC	1.47861
TCGA-A3-3365-01A-01R-0864-07	Alive	873	KIRC	2.1042
TCGA-A3-3367-01A-02R-1420-07	Alive	2270	KIRC	2.7596
TCGA-A3-3370-01A-02R-1420-07	Alive	2274	KIRC	2.42903
TCGA-A3-3372-01A-02R-1325-07	Alive	735	KIRC	2.57367
TCGA-A3-3373-01A-02R-1420-07	Alive	1621	KIRC	1.25574
TCGA-A3-3374-01A-02R-1325-07	Alive	1314	KIRC	0.282618
TCGA-A3-3376-01A-02R-1420-07	Dead	1696	KIRC	2.13953
TCGA-A3-3378-01A-02R-1325-07	Alive	630	KIRC	2.39454
TCGA-A3-3380-01A-01R-0864-07	Alive	567	KIRC	2.6352
TCGA-A3-3382-01A-02R-1325-07	Alive	574	KIRC	3.95333
TCGA-A3-3383-01A-02R-1325-07	Alive	861	KIRC	2.94884
[truncated: 8,345 more rows]

## Sheet: Table V
Table SV. Expression levels of EFNA3 and DSS survival events and time in various cancer samples.
Sample ID	DSS event	DSS time	Tumor type	EFNA3 expression levels
TCGA-02-0047-01A-01R-1849-01	Yes	448	GBM	2.32357
TCGA-02-0055-01A-01R-1849-01	Yes	76	GBM	2.11899
TCGA-02-2483-01A-01R-1849-01	No	466	GBM	4.48472
TCGA-02-2485-01A-01R-1849-01	No	470	GBM	2.08171
TCGA-02-2486-01A-01R-1849-01	Yes	618	GBM	2.11886
TCGA-04-1331-01A-01R-1569-13	Yes	1336	OV	2.80876
TCGA-04-1332-01A-01R-1564-13	Yes	1247	OV	3.18853
TCGA-04-1338-01A-01R-1564-13	No	1418	OV	4.04624
TCGA-04-1341-01A-01R-1564-13	No	33	OV	3.05395
TCGA-04-1343-01A-01R-1564-13	Yes	361	OV	3.81636
TCGA-04-1347-01A-01R-1564-13	No	1919	OV	6.8026
TCGA-04-1350-01A-01R-1565-13	Yes	1946	OV	3.21534
TCGA-04-1356-01A-01R-1569-13	Yes	1499	OV	3.89767
TCGA-04-1357-01A-01R-1565-13	No		OV	1.83005
TCGA-04-1361-01A-01R-1565-13	No	989	OV	3.63415
TCGA-04-1362-01A-01R-1565-13	Yes	1348	OV	2.99163
TCGA-04-1364-01A-01R-1565-13	Yes	1024	OV	5.43775
TCGA-04-1365-01A-01R-1565-13	No	2329	OV	3.5003
TCGA-04-1514-01A-01R-1566-13	No	1720	OV	5.53629
TCGA-04-1519-01A-01R-1565-13	No	24	OV	4.0684
TCGA-04-1530-01A-02R-1569-13	Yes	3622	OV	3.53249
TCGA-04-1536-01A-01R-1566-13	Yes	885	OV	4.24169
TCGA-04-1542-01A-01R-1566-13	Yes	2561	OV	5.46004
TCGA-04-1648-01A-01R-1567-13		871	OV	3.0237
TCGA-04-1651-01A-01R-1567-13		1102	OV	4.57247
TCGA-04-1655-01A-01R-1566-13		1380	OV	4.50576
TCGA-05-4244-01A-01R-1107-07	No	0	LUAD	4.42925
TCGA-05-4249-01A-01R-1107-07	No	1523	LUAD	2.67541
TCGA-05-4250-01A-01R-1107-07		121	LUAD	2.37317
TCGA-05-4382-01A-01R-1206-07	No	607	LUAD	3.90093
TCGA-05-4384-01A-01R-1755-07	No	426	LUAD	4.53079
TCGA-05-4389-01A-01R-1206-07	No	1369	LUAD	5.75931
TCGA-05-4390-01A-02R-1755-07	No	1126	LUAD	2.23603
TCGA-05-4395-01A-01R-1206-07	No	0	LUAD	2.85689
TCGA-05-4396-01A-21R-1858-07		303	LUAD	3.8908
TCGA-05-4397-01A-01R-1206-07		731	LUAD	2.62604
TCGA-05-4398-01A-01R-1206-07	No	1431	LUAD	3.27995
TCGA-05-4402-01A-01R-1206-07	No	244	LUAD	3.50414
TCGA-05-4403-01A-01R-1206-07	No	578	LUAD	3.0701
TCGA-05-4405-01A-21R-1858-07	No	610	LUAD	2.9528
TCGA-05-4410-01A-21R-1858-07	No	0	LUAD	2.06788
TCGA-05-4415-01A-22R-1858-07	Yes	91	LUAD	4.7223
TCGA-05-4417-01A-22R-1858-07	No	455	LUAD	1.38018
TCGA-05-4418-01A-01R-1206-07		274	LUAD	2.82155
TCGA-05-4420-01A-01R-1206-07	No	912	LUAD	2.71343
TCGA-05-4422-01A-01R-1206-07	No	365	LUAD	3.21818
TCGA-05-4424-01A-22R-1858-07	No	913	LUAD	2.24747
TCGA-05-4425-01A-01R-1755-07	No	669	LUAD	2.21767
TCGA-05-4426-01A-01R-1206-07	No	791	LUAD	3.98733
TCGA-05-4427-01A-21R-1858-07	No	791	LUAD	2.32993
TCGA-05-4430-01A-02R-1206-07	No	761	LUAD	3.1998
TCGA-05-4432-01A-01R-1206-07	No	761	LUAD	4.59413
TCGA-05-4433-01A-22R-1858-07	No	730	LUAD	1.69001
TCGA-05-4434-01A-01R-1206-07		457	LUAD	3.50251
TCGA-05-5420-01A-01R-1628-07	No	457	LUAD	1.46587
TCGA-05-5423-01A-01R-1628-07	No	151	LUAD	2.5763
TCGA-05-5425-01A-02R-1628-07	No	882	LUAD	3.19153
TCGA-05-5428-01A-01R-1628-07	No	670	LUAD	4.2092
TCGA-05-5429-01A-01R-1628-07	No	275	LUAD	3.33865
TCGA-05-5715-01A-01R-1628-07	No	62	LUAD	3.3152
TCGA-06-0125-01A-01R-1849-01	Yes	1448	GBM	2.20141
TCGA-06-0125-02A-11R-2005-01	Yes	1448	GBM	3.1176
TCGA-06-0129-01A-01R-1849-01	Yes	1024	GBM	3.20928
TCGA-06-0130-01A-01R-1849-01	Yes	394	GBM	1.30865
TCGA-06-0132-01A-02R-1849-01	Yes	771	GBM	3.1821
TCGA-06-0138-01A-02R-1849-01	Yes	737	GBM	2.57529
TCGA-06-0139-01A-01R-1849-01	Yes	362	GBM	1.77155
TCGA-06-0141-01A-01R-1849-01	Yes	313	GBM	1.6769
TCGA-06-0152-02A-01R-2005-01	Yes	375	GBM	2.49347
TCGA-06-0156-01A-02R-1849-01	Yes	178	GBM	3.0843
TCGA-06-0156-01A-03R-1849-01	Yes	178	GBM	3.28448
TCGA-06-0157-01A-01R-1849-01	Yes	97	GBM	3.18737
TCGA-06-0158-01A-01R-1849-01	Yes	329	GBM	2.56272
TCGA-06-0168-01A-01R-1849-01	Yes	598	GBM	2.82908
TCGA-06-0171-02A-11R-2005-01	Yes	399	GBM	2.014
TCGA-06-0174-01A-01R-1849-01	Yes	98	GBM	3.39932
TCGA-06-0178-01A-01R-1849-01	Yes	2681	GBM	3.53373
TCGA-06-0184-01A-01R-1849-01	Yes	2126	GBM	2.61457
TCGA-06-0187-01A-01R-1849-01	Yes	828	GBM	3.12539
TCGA-06-0190-01A-01R-1849-01	Yes	317	GBM	2.44292
TCGA-06-0190-02A-01R-2005-01	Yes	317	GBM	2.08389
TCGA-06-0210-01A-01R-1849-01	Yes	225	GBM	3.30399
TCGA-06-0210-02A-01R-2005-01	Yes	225	GBM	2.42317
TCGA-06-0211-01A-01R-1849-01	Yes	360	GBM	2.14903
TCGA-06-0211-01B-01R-1849-01	Yes	360	GBM	2.37262
TCGA-06-0211-02A-02R-2005-01	Yes	360	GBM	2.76791
TCGA-06-0219-01A-01R-1849-01	Yes	22	GBM	3.15071
TCGA-06-0221-02A-11R-2005-01	Yes	603	GBM	4.26242
TCGA-06-0238-01A-02R-1849-01	Yes	405	GBM	2.93229
TCGA-06-0644-01A-02R-1849-01	Yes	384	GBM	1.70177
TCGA-06-0645-01A-01R-1849-01	Yes	175	GBM	2.52507
TCGA-06-0646-01A-01R-1849-01	Yes	175	GBM	3.15746
TCGA-06-0649-01B-01R-1849-01	Yes	64	GBM	3.18449
TCGA-06-0686-01A-01R-1849-01	Yes	432	GBM	3.17914
TCGA-06-0743-01A-01R-1849-01	Yes	803	GBM	2.44652
TCGA-06-0744-01A-01R-1849-01	Yes	1426	GBM	2.06202
TCGA-06-0745-01A-01R-1849-01	Yes	239	GBM	3.88353
TCGA-06-0747-01A-01R-1849-01	Yes	82	GBM	2.57597
TCGA-06-0749-01A-01R-1849-01	Yes	82	GBM	3.81122
TCGA-06-0750-01A-01R-1849-01	Yes	28	GBM	2.58775
TCGA-06-0878-01A-01R-1849-01	No	218	GBM	2.53371
TCGA-06-0882-01A-01R-1849-01	Yes	632	GBM	3.76845
TCGA-06-1804-01A-01R-1849-01	Yes	414	GBM	4.42208
TCGA-06-2557-01A-01R-1849-01	Yes	33	GBM	3.12762
TCGA-06-2558-01A-01R-1849-01		380	GBM	3.9203
TCGA-06-2559-01A-01R-1849-01	Yes	150	GBM	3.59383
TCGA-06-2561-01A-02R-1849-01	Yes	537	GBM	2.32423
TCGA-06-2562-01A-01R-1849-01	Yes	382	GBM	3.0943
TCGA-06-2563-01A-01R-1849-01	No	932	GBM	1.83499
TCGA-06-2564-01A-01R-1849-01	No	181	GBM	2.48406
TCGA-06-2565-01A-01R-1849-01	Yes	506	GBM	3.2915
TCGA-06-2567-01A-01R-1849-01	Yes	133	GBM	3.93328
TCGA-06-2569-01A-01R-1849-01	No	13	GBM	5.56397
TCGA-06-2570-01A-01R-1849-01	No	958	GBM	3.11836
TCGA-06-5408-01A-01R-1849-01	Yes	357	GBM	3.592
TCGA-06-5410-01A-01R-1849-01	Yes	108	GBM	2.34338
TCGA-06-5411-01A-01R-1849-01	Yes	254	GBM	4.07052
TCGA-06-5412-01A-01R-1849-01	Yes	138	GBM	2.31208
TCGA-06-5413-01A-01R-1849-01	No	268	GBM	2.80768
TCGA-06-5414-01A-01R-1849-01	No	273	GBM	2.62754
TCGA-06-5416-01A-01R-1849-01	No	204	GBM	3.96736
TCGA-06-5417-01A-01R-1849-01	No	155	GBM	4.28842
TCGA-06-5418-01A-01R-1849-01	Yes	83	GBM	3.41946
TCGA-06-5856-01A-01R-1849-01	Yes	114	GBM	2.97008
TCGA-06-5858-01A-01R-1849-01	No	187	GBM	3.38992
TCGA-06-5859-01A-01R-1849-01	No	139	GBM	3.06994
TCGA-08-0386-01A-01R-1849-01	Yes	548	GBM	3.71395
TCGA-09-0364-01A-02R-1564-13	Yes	887	OV	4.61242
TCGA-09-0366-01A-01R-1564-13	Yes	1757	OV	2.95045
TCGA-09-0367-01A-01R-1564-13	Yes	547	OV	2.61756
TCGA-09-0369-01A-01R-1564-13	Yes	1082	OV	6.16851
TCGA-09-1659-01B-01R-1564-13	Yes	304	OV	2.72879
TCGA-09-1661-01B-01R-1566-13	Yes	1169	OV	3.53028
TCGA-09-1662-01A-01R-1566-13	Yes	2717	OV	2.34886
TCGA-09-1665-01B-01R-1566-13	Yes	1266	OV	4.24805
TCGA-09-1666-01A-01R-1566-13	No	1752	OV	1.51258
TCGA-09-1667-01C-01R-1566-13	No	1882	OV	4.02938
TCGA-09-1668-01B-01R-1566-13	No	1684	OV	2.84236
TCGA-09-1669-01A-01R-1566-13	No	928	OV	3.79116
TCGA-09-1670-01A-01R-1566-13	No	547	OV	2.1574
TCGA-09-1673-01A-01R-1566-13	No	92	OV	3.17656
TCGA-09-2044-01B-01R-1568-13	No	186	OV	2.21822
TCGA-09-2045-01A-01R-1568-13	Yes	1069	OV	3.09798
TCGA-09-2048-01A-01R-1568-13	Yes	138	OV	5.04619
TCGA-09-2051-01A-01R-1568-13	No	1919	OV	3.28684
TCGA-09-2053-01C-01R-1568-13	No	1209	OV	3.49948
TCGA-09-2054-01A-01R-1568-13	Yes	637	OV	4.91615
TCGA-09-2056-01B-01R-1568-13	No	379	OV	2.83005
TCGA-10-0927-01A-02R-1564-13	Yes	2490	OV	2.691
TCGA-10-0928-01A-02R-1564-13	Yes	563	OV	3.40122
TCGA-10-0931-01A-01R-1564-13	Yes	1000	OV	3.63063
TCGA-10-0933-01A-01R-1569-13	Yes	446	OV	4.33056
TCGA-10-0936-01A-01R-1564-13	Yes	1123	OV	3.5705
TCGA-10-0937-01A-02R-1564-13	Yes	608	OV	2.88035
TCGA-10-0938-01A-02R-1564-13	Yes	636	OV	3.72221
TCGA-12-0616-01A-01R-1849-01	Yes	448	GBM	1.88339
TCGA-12-0618-01A-01R-1849-01		395	GBM	4.74359
TCGA-12-0619-01A-01R-1849-01	Yes	1062	GBM	2.82055
TCGA-12-0821-01A-01R-1849-01	Yes	323	GBM	3.55318
TCGA-12-1597-01B-01R-1849-01	Yes	675	GBM	4.11584
TCGA-12-3650-01A-01R-1849-01	Yes	333	GBM	3.20549
TCGA-12-3652-01A-01R-1849-01	Yes	1062	GBM	4.25629
TCGA-12-3653-01A-01R-1849-01	Yes	442	GBM	2.15449
TCGA-12-5295-01A-01R-1849-01	Yes	454	GBM	2.90456
TCGA-12-5299-01A-02R-1849-01	Yes	98	GBM	2.9583
TCGA-13-0714-01A-01R-1564-13	Yes	189	OV	3.06755
TCGA-13-0720-01A-01R-1564-13	Yes	1355	OV	2.36432
TCGA-13-0724-01A-01R-1564-13	Yes	83	OV	4.40622
TCGA-13-0725-01A-01R-1564-13	Yes	377	OV	3.60682
TCGA-13-0726-01A-01R-1564-13	Yes	949	OV	4.05136
TCGA-13-0727-01A-01R-1564-13	Yes	462	OV	3.33745
TCGA-13-0730-01A-01R-1564-13		542	OV	4.81735
TCGA-13-0762-01A-01R-1564-13	No	3400	OV	6.1466
TCGA-13-0765-01A-01R-1564-13	Yes	1389	OV	3.3342
TCGA-13-0766-01A-02R-1564-13	Yes	1725	OV	3.20567
TCGA-13-0768-01A-01R-1569-13	Yes	1784	OV	3.8792
TCGA-13-0795-01A-01R-1564-13	Yes	619	OV	1.724
TCGA-13-0797-01A-01R-1564-13	No	2121	OV	3.86279
TCGA-13-0800-01A-01R-1564-13	No	2661	OV	6.18217
TCGA-13-0804-01A-01R-1564-13	Yes	1073	OV	2.32582
TCGA-13-0883-01A-02R-1569-13	Yes	2097	OV	2.57606
TCGA-13-0884-01B-01R-1565-13	Yes	3260	OV	2.20333
TCGA-13-0885-01A-02R-1569-13	No	3388	OV	2.65652
TCGA-13-0886-01A-01R-1569-13	No	4665	OV	1.6968
TCGA-13-0887-01A-01R-1564-13	Yes	2028	OV	2.11083
TCGA-13-0888-01A-01R-1564-13	No	2811	OV	4.47077
TCGA-13-0891-01A-01R-1564-13	Yes	3128	OV	3.26938
TCGA-13-0893-01B-01R-1565-13	Yes	1319	OV	3.28112
TCGA-13-0897-01A-01R-1564-13	Yes	2182	OV	3.39562
TCGA-13-0900-01B-01R-1565-13	No	4077	OV	3.51784
TCGA-13-0901-01B-01R-1565-13	No	589	OV	4.17952
TCGA-13-0905-01B-01R-1565-13	No	3746	OV	3.42449
TCGA-13-0906-01A-01R-1564-13	No	3619	OV	2.81246
TCGA-13-0908-01B-01R-1565-13	Yes	1843	OV	2.5807
TCGA-13-0911-01A-01R-1564-13	Yes	1355	OV	4.07838
TCGA-13-0913-02A-01R-1564-13	No	3325	OV	2.83078
TCGA-13-0916-01A-01R-1564-13	No	1785	OV	3.61967
TCGA-13-0920-01A-01R-1564-13	Yes	1484	OV	4.53289
TCGA-13-0923-01A-01R-1564-13	No	2547	OV	3.56433
TCGA-13-0924-01A-01R-1564-13	No	2614	OV	2.29231
TCGA-13-1403-01A-01R-1565-13	Yes	2345	OV	2.93478
TCGA-13-1404-01A-01R-1565-13	No	2469	OV	2.80496
TCGA-13-1405-01A-01R-1565-13	Yes	868	OV	2.90858
TCGA-13-1407-01A-01R-1565-13	No	2534	OV	4.08632
TCGA-13-1408-01A-01R-1565-13	Yes	1680	OV	3.10257
TCGA-13-1409-01A-01R-1565-13	Yes	1742	OV	4.22534
TCGA-13-1410-01A-01R-1565-13	No	2464	OV	1.97889
TCGA-13-1411-01A-01R-1565-13	Yes	531	OV	3.29312
TCGA-13-1477-01A-01R-1565-13	Yes	1662	OV	2.96601
TCGA-13-1483-01A-01R-1565-13	Yes	895	OV	3.63545
TCGA-13-1485-01A-02R-1565-13	Yes	629	OV	3.40863
TCGA-13-1487-01A-01R-1565-13	Yes	681	OV	4.58275
TCGA-13-1488-01A-01R-1565-13	Yes	2154	OV	3.95535
TCGA-13-1489-01A-01R-1565-13	No	2553	OV	4.18919
TCGA-13-1489-02A-01R-1565-13	No	2553	OV	4.66986
TCGA-13-1492-01A-01R-1565-13	No	3819	OV	3.91309
TCGA-13-1495-01A-01R-1565-13	Yes	2749	OV	3.81398
TCGA-13-1496-01A-01R-1565-13		129	OV	3.98433
TCGA-13-1497-01A-01R-1565-13	No	3871	OV	2.70139
TCGA-13-1498-01A-01R-1565-13	Yes	2012	OV	2.90211
TCGA-13-1499-01A-01R-1565-13	No	3500	OV	4.0475
TCGA-13-1501-01A-01R-1565-13	Yes	1314	OV	3.79912
TCGA-13-1505-01A-01R-1565-13	No	1998	OV	3.84769
TCGA-13-1506-01A-01R-1565-13	Yes	1039	OV	3.54924
TCGA-13-1507-01A-01R-1565-13	Yes	1993	OV	2.12793
TCGA-13-1509-01A-01R-1565-13	No	2438	OV	3.3172
TCGA-13-1510-01A-02R-1565-13	Yes	1359	OV	4.18683
TCGA-13-1511-01A-01R-1565-13	Yes	1650	OV	4.26882
TCGA-13-1512-01A-01R-1565-13	No	442	OV	4.50883
TCGA-13-2060-01A-01R-1568-13	No	2369	OV	3.97478
TCGA-13-A5FT-01A-11R-A406-31	No	2143	OV	4.2207
TCGA-14-0736-02A-01R-2005-01	Yes	460	GBM	3.12385
TCGA-14-0781-01B-01R-1849-01	Yes	29	GBM	2.82497
TCGA-14-0787-01A-01R-1849-01		68	GBM	3.10879
TCGA-14-0789-01A-01R-1849-01		342	GBM	3.47799
TCGA-14-0790-01B-01R-1849-01	Yes	419	GBM	2.70629
TCGA-14-0817-01A-01R-1849-01		164	GBM	2.80956
TCGA-14-0871-01A-01R-1849-01		880	GBM	4.44608
TCGA-14-1034-01A-01R-1849-01	Yes	485	GBM	2.73001
TCGA-14-1034-02B-01R-2005-01	Yes	485	GBM	2.89776
TCGA-14-1402-02A-01R-2005-01	Yes	975	GBM	2.72506
TCGA-14-1823-01A-01R-1849-01	Yes	543	GBM	2.01728
TCGA-14-1825-01A-01R-1850-01	Yes	232	GBM	2.64556
TCGA-14-1829-01A-01R-1850-01	No	218	GBM	2.05908
TCGA-14-2554-01A-01R-1850-01	Yes	532	GBM	2.65537
TCGA-15-0742-01A-01R-1850-01		419	GBM	2.87918
TCGA-15-1444-01A-02R-1850-01	Yes	1537	GBM	3.94296
TCGA-16-0846-01A-01R-1850-01	Yes	119	GBM	3.82261
TCGA-16-1045-01B-01R-1850-01	Yes	883	GBM	2.86019
TCGA-18-3406-01A-01R-0980-07	Yes	371	LUSC	3.94363
TCGA-18-3407-01A-01R-0980-07	No	136	LUSC	2.86888
TCGA-18-3408-01A-01R-0980-07	Yes	2304	LUSC	3.66611
TCGA-18-3409-01A-01R-0980-07	No	3747	LUSC	4.70128
TCGA-18-3410-01A-01R-0980-07	No	146	LUSC	1.37757
TCGA-18-3411-01A-01R-0980-07	No	3576	LUSC	3.0508
TCGA-18-3412-01A-01R-0980-07	Yes	345	LUSC	2.84792
TCGA-18-3414-01A-01R-0980-07	No	716	LUSC	4.67185
TCGA-18-3415-01A-01R-0980-07	No	2803	LUSC	3.12717
TCGA-18-3416-01A-01R-0980-07	Yes	973	LUSC	2.49996
TCGA-18-3417-01A-01R-1443-07	No	1097	LUSC	3.29483
TCGA-18-3419-01A-01R-0980-07	No	2811	LUSC	3.42976
TCGA-18-3421-01A-01R-0980-07	No	2645	LUSC	3.52787
TCGA-18-4083-01A-01R-1100-07	No	188	LUSC	2.85806
TCGA-18-4086-01A-01R-1100-07	No	85	LUSC	2.7695
TCGA-18-4721-01A-01R-1443-07	No	4694	LUSC	2.86764
TCGA-18-5592-01A-01R-1635-07	No	1519	LUSC	3.72888
TCGA-18-5595-01A-01R-1635-07		827	LUSC	3.74707
TCGA-19-0957-02A-11R-2005-01	Yes	666	GBM	2.50388
TCGA-19-1389-02A-21R-2005-01	Yes	141	GBM	1.67265
TCGA-19-1390-01A-01R-1850-01		772	GBM	2.42567
TCGA-19-1787-01B-01R-1850-01	Yes	385	GBM	1.54369
TCGA-19-2619-01A-01R-1850-01	No	294	GBM	2.44599
TCGA-19-2620-01A-01R-1850-01	No	148	GBM	2.24832
TCGA-19-2624-01A-01R-1850-01	No	5	GBM	3.12781
TCGA-19-2625-01A-01R-1850-01	No	124	GBM	3.24396
TCGA-19-2629-01A-01R-1850-01	Yes	737	GBM	3.13822
TCGA-19-4065-01A-01R-2005-01	No	214	GBM	2.47407
TCGA-19-4065-02A-11R-2005-01	No	214	GBM	2.92499
TCGA-19-5960-01A-11R-1850-01	Yes	455	GBM	4.10662
TCGA-20-0987-01A-02R-1564-13	Yes	701	OV	4.85982
TCGA-20-0991-01A-01R-1564-13	No	797	OV	3.64121
TCGA-20-1682-01A-01R-1564-13	No	837	OV	3.33683
TCGA-20-1683-01A-01R-1566-13	No	772	OV	3.39083
TCGA-20-1686-01A-01R-1566-13	No	89	OV	3.06802
TCGA-20-1687-01A-01R-1566-13	No	81	OV	3.61201
TCGA-21-1070-01A-01R-0692-07	No	3636	LUSC	3.16131
TCGA-21-1071-01A-01R-0692-07	Yes	1426	LUSC	2.22928
TCGA-21-1072-01A-01R-0692-07	No	3016	LUSC	3.57983
TCGA-21-1075-01A-01R-0692-07	No	2134	LUSC	4.59225
TCGA-21-1076-01A-01R-0692-07	No	1852	LUSC	3.28611
TCGA-21-1076-01A-02R-0692-07	No	1852	LUSC	3.15937
TCGA-21-1077-01A-01R-0692-07	Yes	1058	LUSC	2.91812
TCGA-21-1078-01A-01R-0692-07	Yes	474	LUSC	1.93353
TCGA-21-1079-01A-01R-0692-07	Yes	965	LUSC	2.82745
TCGA-21-1080-01A-01R-0692-07	No	3724	LUSC	3.85144
TCGA-21-1081-01A-01R-0692-07	Yes	284	LUSC	4.35796
TCGA-21-1082-01A-01R-0692-07	No	3644	LUSC	2.78172
TCGA-21-1083-01A-01R-0692-07	No	1315	LUSC	2.92497
TCGA-21-5782-01A-01R-1635-07		962	LUSC	3.80996
TCGA-21-5783-01A-41R-2187-07		2680	LUSC	4.21627
TCGA-21-5784-01A-01R-1635-07	No	1268	LUSC	5.07705
TCGA-21-5786-01A-01R-1635-07	No	1032	LUSC	3.4626
TCGA-21-5787-01A-01R-1635-07	Yes	329	LUSC	3.61732
TCGA-21-A5DI-01A-31R-A26W-07	No	979	LUSC	3.12456
TCGA-22-0940-01A-01R-0692-07	Yes	669	LUSC	2.27617
TCGA-22-0944-01A-01R-0692-07	No	223	LUSC	4.16942
TCGA-22-1000-01A-01R-A32Z-07	Yes	454	LUSC	1.99201
TCGA-22-1002-01A-01R-0692-07	No	131	LUSC	2.05918
TCGA-22-1005-01A-01R-0692-07	No	1953	LUSC	1.11557
TCGA-22-1011-01A-01R-0692-07	No	53	LUSC	2.77254
TCGA-22-1012-01A-01R-0692-07	No	429	LUSC	4.66274
TCGA-22-1016-01A-01R-0692-07	No	822	LUSC	3.39456
TCGA-22-1017-01A-01R-0692-07	Yes	1485	LUSC	2.10591
TCGA-22-4591-01A-01R-1201-07	Yes	623	LUSC	3.29977
TCGA-22-4593-01A-21R-1820-07	No	1067	LUSC	3.04672
TCGA-22-4594-01A-01R-1201-07		1470	LUSC	2.19497
TCGA-22-4595-01A-01R-1201-07	Yes	734	LUSC	3.32839
TCGA-22-4596-01A-01R-1201-07	No	17	LUSC	2.8654
TCGA-22-4599-01A-01R-1443-07		1161	LUSC	2.53625
TCGA-22-4601-01A-01R-1443-07	Yes	1057	LUSC	5.12309
TCGA-22-4604-01A-01R-1201-07	Yes	399	LUSC	3.09646
TCGA-22-4605-01A-21R-2125-07	No	974	LUSC	4.60584
TCGA-22-4607-01A-01R-1201-07	No	587	LUSC	2.88518
TCGA-22-4609-01A-21R-2125-07	No	291	LUSC	4.13116
TCGA-22-4613-01A-01R-1443-07		358	LUSC	4.10563
TCGA-22-5471-01A-01R-1635-07	No	1845	LUSC	3.85737
TCGA-22-5472-01A-01R-1635-07	No	1975	LUSC	3.67871
TCGA-22-5473-01A-01R-1635-07	No	1933	LUSC	3.85817
TCGA-22-5474-01A-01R-1635-07	No	445	LUSC	2.37593
TCGA-22-5477-01A-01R-1635-07		1346	LUSC	1.90092
TCGA-22-5478-01A-01R-1635-07	No	24	LUSC	4.33842
TCGA-22-5479-01A-31R-1949-07		2625	LUSC	3.63007
TCGA-22-5480-01A-01R-1635-07	Yes	2170	LUSC	2.19793
TCGA-22-5481-01A-31R-1949-07		2409	LUSC	3.52123
TCGA-22-5482-01A-01R-1635-07	No	357	LUSC	5.18564
TCGA-22-5483-01A-01R-1820-07	Yes	573	LUSC	2.39083
TCGA-22-5485-01A-01R-1635-07	Yes	916	LUSC	2.80538
TCGA-22-5489-01A-01R-1635-07	Yes	1912	LUSC	2.89765
TCGA-22-5491-01A-01R-1635-07		1713	LUSC	3.27824
TCGA-22-5492-01A-01R-1635-07		506	LUSC	2.36126
TCGA-22-A5C4-01A-12R-A27Q-07	No	671	LUSC	3.51602
TCGA-23-1021-01B-01R-1564-13	Yes	1446	OV	2.42331
TCGA-23-1022-01A-01R-1564-13	Yes	1511	OV	5.39309
TCGA-23-1023-01A-02R-1564-13	No	1233	OV	2.62349
TCGA-23-1024-01A-02R-1564-13	No	468	OV	4.06175
TCGA-23-1026-01B-01R-1569-13	No	816	OV	2.92317
TCGA-23-1027-01A-02R-1564-13		976	OV	3.27536
TCGA-23-1028-01A-01R-1564-13	No	1503	OV	2.9072
TCGA-23-1029-01B-01R-1567-13	No	268	OV	2.52072
TCGA-23-1030-01A-02R-1564-13	No	886	OV	2.05523
TCGA-23-1107-01A-01R-1564-13	Yes	9	OV	2.96057
TCGA-23-1109-01A-01R-1564-13	Yes	1562	OV	2.24659
TCGA-23-1110-01A-01R-1564-13	No	1658	OV	4.64537
TCGA-23-1111-01A-01R-1567-13	No	98	OV	1.70461
TCGA-23-1113-01A-01R-1564-13	Yes	949	OV	3.32302
TCGA-23-1114-01B-01R-1566-13	Yes	2089	OV	4.35728
TCGA-23-1116-01A-01R-1564-13	Yes	592	OV	3.43543
TCGA-23-1118-01A-01R-1564-13	No	2616	OV	2.45207
TCGA-23-1119-01A-02R-1565-13	No	3953	OV	4.20604
TCGA-23-1120-01A-02R-1565-13	No	130	OV	3.94646
TCGA-23-1122-01A-01R-1565-13	Yes	1189	OV	3.2841
TCGA-23-1123-01A-01R-1565-13	Yes	1018	OV	4.49395
TCGA-23-1809-01A-01R-1566-13	No	16	OV	3.73382
TCGA-23-2077-01A-01R-1568-13	No	3525	OV	4.10275
TCGA-23-2078-01A-01R-1568-13	No	2661	OV	3.70119
TCGA-23-2084-01A-02R-1568-13	Yes	1516	OV	3.07056
TCGA-24-0966-01A-01R-1564-13	No	232	OV	2.21704
TCGA-24-0968-01A-01R-1569-13	Yes		OV	2.57352
TCGA-24-0970-01B-01R-1565-13	Yes	354	OV	2.99117
TCGA-24-0979-01A-01R-1565-13	Yes	1264	OV	3.1832
TCGA-24-0982-01A-01R-1565-13	Yes	679	OV	3.15308
TCGA-24-1103-01A-01R-1565-13	Yes	1646	OV	3.01402
TCGA-24-1104-01A-01R-1565-13	Yes	1933	OV	2.70334
TCGA-24-1105-01A-01R-1565-13	Yes	1442	OV	3.94262
TCGA-24-1413-01A-01R-1565-13	No	192	OV	2.98455
TCGA-24-1416-01A-01R-1565-13	No	194	OV	1.92345
TCGA-24-1417-01A-01R-1565-13	No	238	OV	3.07782
TCGA-24-1418-01A-01R-1565-13	No	243	OV	2.19969
TCGA-24-1419-01A-01R-1565-13	No	239	OV	4.4724
TCGA-24-1422-01A-01R-1565-13		23	OV	2.69357
TCGA-24-1423-01A-01R-1565-13	No	190	OV	3.82402
TCGA-24-1424-01A-01R-1565-13	No	183	OV	4.35992
TCGA-24-1425-01A-02R-1566-13	No	181	OV	2.12191
TCGA-24-1426-01A-01R-1565-13	No	163	OV	2.01432
TCGA-24-1427-01A-01R-1565-13	No	147	OV	3.33708
TCGA-24-1428-01A-01R-1564-13	No	529	OV	3.10414
TCGA-24-1430-01A-01R-1566-13	Yes	863	OV	3.93473
TCGA-24-1431-01A-01R-1566-13	Yes	567	OV	1.71444
TCGA-24-1434-01A-01R-1566-13	Yes	568	OV	2.70399
TCGA-24-1435-01A-01R-1566-13	Yes	1324	OV	4.1916
TCGA-24-1464-01A-01R-1566-13	Yes	379	OV	3.55818
TCGA-24-1467-01A-01R-1566-13	Yes	3224	OV	3.00247
TCGA-24-1469-01A-01R-1566-13	No	277	OV	4.04832
TCGA-24-1470-01A-01R-1566-13	No	105	OV	3.47102
TCGA-24-1471-01A-01R-1566-13	No	36	OV	2.1335
TCGA-24-1474-01A-01R-1566-13	Yes	676	OV	5.25029
TCGA-24-1544-01A-01R-1566-13	Yes	820	OV	5.23073
TCGA-24-1546-01A-01R-1566-13		1955	OV	5.04357
TCGA-24-1549-01A-01R-1566-13	Yes	1721	OV	2.98474
TCGA-24-1550-01A-01R-1566-13	Yes	1249	OV	4.39812
TCGA-24-1551-01A-01R-1566-13	Yes	1579	OV	2.62476
TCGA-24-1552-01A-01R-1566-13	Yes	1259	OV	2.86055
TCGA-24-1553-01A-01R-1566-13	Yes	1767	OV	3.86382
TCGA-24-1557-01A-01R-1566-13	Yes	1213	OV	3.3084
TCGA-24-1558-01A-01R-1566-13	Yes	594	OV	4.60085
TCGA-24-1560-01A-01R-1566-13	Yes	1341	OV	2.98149
TCGA-24-1562-01A-01R-1566-13	Yes	1384	OV	2.93529
TCGA-24-1563-01A-01R-1566-13	Yes	1451	OV	3.04597
TCGA-24-1564-01A-01R-1566-13	Yes	787	OV	3.71565
TCGA-24-1565-01A-01R-1566-13	Yes	312	OV	2.50909
TCGA-24-1567-01A-01R-1566-13	Yes	524	OV	5.53963
TCGA-24-1603-01A-01R-1566-13	Yes	2742	OV	3.06803
TCGA-24-1604-01A-01R-1566-13	Yes	2688	OV	2.94403
TCGA-24-1616-01A-01R-1566-13	Yes	1163	OV	3.19142
TCGA-24-1842-01A-01R-1567-13	No	253	OV	3.23016
TCGA-24-1843-01A-01R-1567-13	No	106	OV	2.60739
TCGA-24-1844-01A-01R-1567-13	No	113	OV	3.89898
TCGA-24-1845-01A-01R-1567-13	No	116	OV	2.71169
TCGA-24-1846-01A-01R-1567-13	No	133	OV	2.86324
TCGA-24-1847-01A-01R-1566-13	No	343	OV	2.4557
TCGA-24-1850-01A-01R-1567-13	No	168	OV	4.45418
TCGA-24-1923-01A-01R-1567-13	Yes	690	OV	3.22172
TCGA-24-1924-01A-01R-1567-13	Yes	919	OV	3.53277
TCGA-24-1928-01A-01R-1567-13	Yes	336	OV	2.76909
TCGA-24-1930-01A-01R-1567-13	Yes	2467	OV	1.97379
TCGA-24-2020-01A-01R-1567-13	Yes	4624	OV	3.41171
TCGA-24-2023-01A-01R-1567-13	Yes	1364	OV	2.80166
TCGA-24-2024-01A-02R-1568-13	Yes	1769	OV	3.6063
TCGA-24-2026-01A-01R-1567-13		1059	OV	3.87611
TCGA-24-2027-01A-01R-1567-13	Yes	3337	OV	3.28419
TCGA-24-2033-01A-01R-1568-13	Yes	562	OV	3.1927
TCGA-24-2035-01A-01R-1568-13	Yes	857	OV	1.43728
TCGA-24-2036-01A-01R-1568-13	Yes	1947	OV	3.28321
TCGA-24-2038-01A-01R-1568-13	Yes	1354	OV	2.20786
TCGA-24-2254-01A-01R-1568-13	Yes	1736	OV	3.82546
TCGA-24-2261-01A-01R-1568-13	Yes	24	OV	3.14094
TCGA-24-2262-01A-01R-1568-13	Yes	11	OV	4.43403
TCGA-24-2267-01A-01R-1568-13	Yes	1446	OV	2.2286
TCGA-24-2271-01A-01R-1568-13	Yes	962	OV	2.55795
TCGA-24-2280-01A-01R-1568-13	No	2143	OV	3.52293
TCGA-24-2281-01A-01R-1568-13	No	1357	OV	2.71477
TCGA-24-2288-01A-01R-1568-13	Yes	25	OV	2.93655
TCGA-24-2289-01A-01R-1568-13	Yes	2049	OV	3.42373
TCGA-24-2290-01A-01R-1568-13	Yes	1102	OV	2.12565
TCGA-24-2293-01A-01R-1568-13		506	OV	1.85096
TCGA-24-2297-01A-01R-1568-13		1699	OV	2.50284
TCGA-24-2298-01A-01R-1569-13	Yes	1620	OV	2.61648
TCGA-25-1312-01A-01R-1565-13		31	OV	1.76396
TCGA-25-1313-01A-01R-1565-13	Yes	820	OV	2.10145
TCGA-25-1315-01A-01R-1565-13	Yes	1583	OV	3.97604
TCGA-25-1316-01A-01R-1565-13	Yes	1279	OV	5.89921
TCGA-25-1317-01A-01R-1565-13		61	OV	4.87858
TCGA-25-1318-01A-01R-1565-13	Yes	1064	OV	3.57754
TCGA-25-1319-01A-01R-1565-13		1977	OV	3.66111
TCGA-25-1320-01A-01R-1565-13	Yes	1155	OV	3.65297
TCGA-25-1321-01A-01R-1565-13	Yes	1033	OV	2.89272
TCGA-25-1322-01A-01R-1565-13	Yes	91	OV	3.04867
TCGA-25-1323-01A-01R-1565-13	Yes	395	OV	4.87282
TCGA-25-1326-01A-01R-1565-13	Yes	1249	OV	3.59736
TCGA-25-1328-01A-01R-1565-13	Yes	2009	OV	2.42019
TCGA-25-1329-01A-01R-1565-13		457	OV	3.20566
TCGA-25-1623-01A-01R-1566-13	Yes	565	OV	2.9119
TCGA-25-1626-01A-01R-1566-13	Yes	518	OV	2.4969
TCGA-25-1627-01A-01R-1566-13		394	OV	3.73816
TCGA-25-1628-01A-01R-1566-13	Yes	627	OV	3.35062
TCGA-25-1630-01A-01R-1566-13		1162	OV	3.22788
TCGA-25-1631-01A-01R-1569-13	No	9	OV	3.36199
TCGA-25-1632-01A-01R-1566-13	Yes	1799	OV	4.13754
TCGA-25-1633-01A-01R-1566-13	Yes	1891	OV	4.55469
TCGA-25-1634-01A-01R-1566-13	Yes	1091	OV	3.87141
TCGA-25-1635-01A-01R-1566-13	Yes	1583	OV	3.26437
TCGA-25-1870-01A-01R-1567-13	Yes	455	OV	2.44806
TCGA-25-1877-01A-01R-1567-13	Yes	730	OV	4.96125
TCGA-25-2042-01A-01R-1568-13	Yes	396	OV	2.37868
TCGA-25-2391-01A-01R-1569-13	No	1492	OV	3.55128
TCGA-25-2392-01A-01R-1569-13		31	OV	2.86279
TCGA-25-2393-01A-01R-1569-13	Yes	1157	OV	4.37145
TCGA-25-2396-01A-01R-1569-13		92	OV	2.01596
TCGA-25-2397-01A-01R-1569-13		365	OV	2.69851
TCGA-25-2398-01A-01R-1569-13	Yes	1369	OV	3.80121
TCGA-25-2399-01A-01R-1569-13	Yes	608	OV	3.73144
TCGA-25-2400-01A-01R-1569-13	Yes	1278	OV	3.07451
TCGA-25-2401-01A-01R-1569-13		90	OV	2.41129
TCGA-25-2404-01A-01R-1569-13	Yes	883	OV	2.96412
TCGA-25-2409-01A-01R-1569-13	Yes	821	OV	2.25005
TCGA-26-1442-01A-01R-1850-01	No	953	GBM	3.40364
TCGA-26-5132-01A-01R-1850-01	No	286	GBM	4.67452
TCGA-26-5133-01A-01R-1850-01	No	452	GBM	3.53442
TCGA-26-5134-01A-01R-1850-01	No	167	GBM	3.46019
TCGA-26-5135-01A-01R-1850-01		270	GBM	3.51116
TCGA-26-5136-01B-01R-1850-01	Yes	577	GBM	4.23747
TCGA-26-5139-01A-01R-1850-01	No	48	GBM	2.89631
TCGA-27-1830-01A-01R-1850-01	Yes	154	GBM	2.60777
TCGA-27-1831-01A-01R-1850-01	Yes	505	GBM	1.80995
TCGA-27-1832-01A-01R-1850-01	Yes	300	GBM	2.79844
TCGA-27-1834-01A-01R-1850-01	Yes	1233	GBM	3.25479
TCGA-27-1835-01A-01R-1850-01	Yes	648	GBM	1.9571
TCGA-27-1837-01A-01R-1850-01	Yes	427	GBM	2.58253
TCGA-27-2519-01A-01R-1850-01	Yes	550	GBM	2.98698
TCGA-27-2521-01A-01R-1850-01	Yes	510	GBM	3.83128
TCGA-27-2523-01A-01R-1850-01	Yes	489	GBM	2.33368
TCGA-27-2524-01A-01R-1850-01	Yes	231	GBM	2.97471
TCGA-27-2526-01A-01R-1850-01	Yes	87	GBM	2.15264
TCGA-27-2528-01A-01R-1850-01	Yes	480	GBM	2.90508
TCGA-28-1747-01C-01R-1850-01		77	GBM	3.06924
TCGA-28-1753-01A-01R-1850-01	No	37	GBM	1.78509
TCGA-28-2499-01A-01R-1850-01		95	GBM	2.39854
TCGA-28-2509-01A-01R-1850-01	No	145	GBM	4.0179
TCGA-28-2513-01A-01R-1850-01	No	222	GBM	1.9668
TCGA-28-2514-01A-02R-1850-01	No	160	GBM	3.96021
TCGA-28-5204-01A-01R-1850-01	Yes	454	GBM	2.1859
TCGA-28-5207-01A-01R-1850-01	Yes	343	GBM	3.00394
TCGA-28-5208-01A-01R-1850-01	Yes	544	GBM	3.19676
TCGA-28-5209-01A-01R-1850-01	No	442	GBM	2.59364
TCGA-28-5213-01A-01R-1850-01	No	951	GBM	2.62555
TCGA-28-5215-01A-01R-1850-01	Yes	335	GBM	2.28386
TCGA-28-5216-01A-01R-1850-01	No	415	GBM	3.69237
TCGA-28-5218-01A-01R-1850-01		157	GBM	1.76048
TCGA-28-5220-01A-01R-1850-01	Yes	388	GBM	2.22555
TCGA-29-1688-01A-01R-1566-13	Yes	2400	OV	2.3425
TCGA-29-1690-01A-01R-1566-13	Yes	1448	OV	3.87402
TCGA-29-1691-01A-01R-1566-13	Yes	1470	OV	3.92686
TCGA-29-1693-01A-01R-1567-13	No	3096	OV	3.52222
TCGA-29-1694-01A-01R-1567-13	Yes	1187	OV	3.63156
TCGA-29-1695-01A-01R-1567-13		1229	OV	3.40972
TCGA-29-1696-01A-01R-1567-13	Yes	1032	OV	3.34042
TCGA-29-1697-01A-01R-1567-13	Yes	949	OV	3.36958
TCGA-29-1701-01A-01R-1567-13	Yes	515	OV	3.28828
TCGA-29-1703-01A-01R-1567-13	Yes	1815	OV	4.27222
TCGA-29-1705-01A-01R-1567-13	Yes	555	OV	2.27545
TCGA-29-1707-02A-01R-1567-13	No	1277	OV	2.89321
TCGA-29-1710-01A-02R-1567-13	Yes	951	OV	3.25372
TCGA-29-1711-01A-01R-1567-13	No	1053	OV	3.58747
TCGA-29-1761-01A-01R-1567-13	Yes	528	OV	2.68975
TCGA-29-1762-01A-01R-1567-13	Yes	2634	OV	4.51273
TCGA-29-1763-01A-02R-1567-13	No	2032	OV	4.35621
TCGA-29-1766-01A-01R-1567-13	Yes	1199	OV	3.49436
TCGA-29-1768-01A-01R-1567-13	Yes	952	OV	2.44414
TCGA-29-1769-01A-01R-1567-13	No	699	OV	3.8225
TCGA-29-1770-01A-01R-1567-13	No	741	OV	2.52742
TCGA-29-1774-01A-01R-1567-13	No	527	OV	4.86457
TCGA-29-1776-01A-01R-1567-13	No	360	OV	2.79477
TCGA-29-1777-01A-01R-1567-13	No	374	OV	2.70591
TCGA-29-1778-01A-01R-1567-13	No	454	OV	2.31208
TCGA-29-1781-01A-01R-1567-13	No	255	OV	2.43379
TCGA-29-1783-01A-01R-1567-13	No	220	OV	3.06931
TCGA-29-1784-01A-02R-1567-13	No	163	OV	3.40932
TCGA-29-1785-01A-01R-1567-13		1104	OV	2.58532
TCGA-29-2414-01A-02R-1569-13	Yes	2621	OV	4.25401
TCGA-29-2414-02A-01R-1569-13	Yes	2621	OV	3.79843
TCGA-29-2425-01A-01R-1569-13	No	1977	OV	4.13288
TCGA-29-2427-01A-01R-1569-13	No	1900	OV	1.88799
TCGA-29-2428-01A-01R-1569-13	No	1372	OV	5.022
TCGA-29-A5NZ-01A-11R-A406-31	Yes	1088	OV	3.7098
TCGA-2A-A8VL-01A-21R-A37L-07	No	621	PRAD	1.80966
TCGA-2A-A8VO-01A-11R-A37L-07	No	1701	PRAD	1.60008
TCGA-2A-A8VT-01A-11R-A37L-07	No	1373	PRAD	2.18237
TCGA-2A-A8VV-01A-11R-A37L-07	No	671	PRAD	1.76757
TCGA-2A-A8VX-01A-11R-A37L-07	No	1378	PRAD	2.33248
TCGA-2A-A8W1-01A-11R-A37L-07	No	112	PRAD	1.13172
TCGA-2A-A8W3-01A-11R-A37L-07	No	863	PRAD	4.81607
TCGA-2A-AAYF-01A-11R-A41O-07	No	1364	PRAD	2.04987
TCGA-2A-AAYO-01A-11R-A41O-07	No	1272	PRAD	1.79427
TCGA-2A-AAYU-01A-11R-A41O-07	No	615	PRAD	2.00482
TCGA-2E-A9G8-01A-11R-A40A-07	No	1249	UCEC	3.41823
TCGA-2F-A9KO-01A-11R-A38B-07	Yes	734	BLCA	1.87011
TCGA-2F-A9KP-01A-11R-A38B-07	Yes	364	BLCA	2.52692
TCGA-2F-A9KQ-01A-11R-A38B-07	No	2886	BLCA	2.64238
TCGA-2F-A9KR-01A-11R-A38B-07	Yes	3183	BLCA	4.87458
TCGA-2F-A9KT-01A-11R-A38B-07	No	3314	BLCA	3.43429
TCGA-2F-A9KW-01A-11R-A38B-07	Yes	254	BLCA	1.05728
TCGA-2G-AAEW-01A-11R-A430-07	Yes	618	TGCT	3.86145
TCGA-2G-AAEX-01A-11R-A430-07	No	1259	TGCT	3.67129
TCGA-2G-AAF1-01A-11R-A430-07	No	1403	TGCT	3.63901
TCGA-2G-AAF4-01A-11R-A430-07	No	2315	TGCT	3.27676
TCGA-2G-AAF6-01A-11R-A430-07	No	3491	TGCT	3.86921
TCGA-2G-AAF8-01A-11R-A430-07	No	3911	TGCT	3.91692
TCGA-2G-AAFE-01A-11R-A430-07	No	4702	TGCT	4.12192
TCGA-2G-AAFG-01A-11R-A430-07	No	6183	TGCT	3.59979
TCGA-2G-AAFG-05A-11R-A430-07	No	6183	TGCT	3.5501
TCGA-2G-AAFH-01A-12R-A430-07	No	1375	TGCT	2.82224
TCGA-2G-AAFI-01A-21R-A430-07	No	675	TGCT	2.48316
TCGA-2G-AAFJ-01A-11R-A430-07	No	792	TGCT	3.08928
TCGA-2G-AAFL-01A-21R-A430-07	No	750	TGCT	2.33282
TCGA-2G-AAFM-01A-11R-A430-07	No	503	TGCT	3.54289
TCGA-2G-AAFN-01A-31R-A430-07	No	773	TGCT	2.82737
TCGA-2G-AAFO-01A-31R-A430-07	No	685	TGCT	2.7411
TCGA-2G-AAFV-01A-11R-A430-07	No	1389	TGCT	2.82823
TCGA-2G-AAFY-01A-11R-A430-07	No	1099	TGCT	2.17913
TCGA-2G-AAFZ-01A-11R-A430-07	No	1353	TGCT	2.40248
TCGA-2G-AAG0-01A-11R-A430-07	No	1529	TGCT	2.35885
TCGA-2G-AAG3-01A-11R-A430-07	No	1593	TGCT	3.58861
TCGA-2G-AAG5-01A-11R-A430-07	No	2299	TGCT	2.71427
TCGA-2G-AAG6-01A-11R-A430-07	No	2231	TGCT	2.71861
TCGA-2G-AAG7-01A-11R-A430-07	No	2475	TGCT	2.4995
TCGA-2G-AAG8-01A-31R-A430-07	No	2289	TGCT	2.24814
TCGA-2G-AAG9-01A-11R-A430-07	No	2234	TGCT	3.87212
TCGA-2G-AAGA-01A-11R-A430-07	No	2439	TGCT	2.35502
TCGA-2G-AAGC-01A-21R-A430-07	No	2585	TGCT	2.80172
TCGA-2G-AAGE-01A-21R-A430-07	No	2478	TGCT	2.27953
TCGA-2G-AAGF-01A-31R-A430-07	No	2734	TGCT	2.79489
TCGA-2G-AAGG-01A-11R-A430-07	No	2611	TGCT	2.44186
TCGA-2G-AAGI-01A-11R-A430-07	No	3137	TGCT	2.62616
TCGA-2G-AAGI-05A-11R-A430-07	No	3137	TGCT	3.80038
TCGA-2G-AAGJ-01A-11R-A430-07	No	2938	TGCT	1.67143
TCGA-2G-AAGK-01A-11R-A430-07	No	3621	TGCT	2.53677
TCGA-2G-AAGM-01A-11R-A430-07	No	3891	TGCT	1.90758
TCGA-2G-AAGN-01A-11R-A430-07	No	3656	TGCT	1.81348
TCGA-2G-AAGO-01A-11R-A430-07	No	4026	TGCT	2.37106
TCGA-2G-AAGP-01A-11R-A430-07	No	4018	TGCT	1.97845
TCGA-2G-AAGS-01A-11R-A430-07	No	4816	TGCT	3.18222
TCGA-2G-AAGT-01A-11R-A430-07	No	4406	TGCT	2.28549
TCGA-2G-AAGV-01A-11R-A430-07	No	4527	TGCT	4.42545
TCGA-2G-AAGW-01A-11R-A430-07	No	4899	TGCT	2.3051
TCGA-2G-AAGX-01A-11R-A430-07	No	5514	TGCT	2.91718
TCGA-2G-AAGY-01A-11R-A430-07	No	5329	TGCT	3.87251
TCGA-2G-AAGY-05A-11R-A430-07	No	5329	TGCT	3.6378
TCGA-2G-AAGZ-01A-11R-A430-07	No	5233	TGCT	2.83883
TCGA-2G-AAH0-01A-11R-A430-07	No	5477	TGCT	3.80699
TCGA-2G-AAH2-01A-11R-A430-07	No	6060	TGCT	2.86584
TCGA-2G-AAH3-01A-11R-A430-07	No	1822	TGCT	3.70558
TCGA-2G-AAH4-01A-12R-A430-07	No	6210	TGCT	3.24682
TCGA-2G-AAH8-01A-11R-A430-07	No	2248	TGCT	3.95458
TCGA-2G-AAHA-01A-11R-A430-07	No	3349	TGCT	4.31436
TCGA-2G-AAHC-01A-11R-A430-07	No	5539	TGCT	3.77923
TCGA-2G-AAHG-01A-11R-A430-07	No	1819	TGCT	4.47885
TCGA-2G-AAHL-01A-11R-A430-07	No	7081	TGCT	4.25404
TCGA-2G-AAHN-01A-11R-A430-07	No	6445	TGCT	4.10667
TCGA-2G-AAHP-01A-12R-A430-07	No	5667	TGCT	4.70587
TCGA-2G-AAHP-05A-11R-A430-07	No	5667	TGCT	3.89931
TCGA-2G-AAHT-01A-11R-A430-07	No	542	TGCT	3.75142
TCGA-2G-AAKD-01A-31R-A430-07	No	6340	TGCT	3.67013
TCGA-2G-AAKG-01A-11R-A430-07	No	6598	TGCT	3.2034
TCGA-2G-AAKG-05A-11R-A430-07	No	6598	TGCT	3.06357
TCGA-2G-AAKH-01A-11R-A430-07	No	6862	TGCT	1.81344
TCGA-2G-AAKL-01A-11R-A430-07	No	7023	TGCT	1.49503
TCGA-2G-AAKM-01A-11R-A430-07	No	6972	TGCT	2.56677
TCGA-2G-AAL5-01A-11R-A430-07	No	7437	TGCT	3.32007
TCGA-2G-AAL7-01A-11R-A430-07	No	3991	TGCT	2.43898
TCGA-2G-AALP-01A-12R-A430-07	No	2645	TGCT	3.72384
TCGA-2H-A9GF-01A-11R-A37I-31	Yes	784	ESCA	1.84322
TCGA-2H-A9GG-01A-11R-A37I-31	Yes	610	ESCA	2.79244
TCGA-2H-A9GH-01A-11R-A37I-31	Yes	951	ESCA	2.43848
TCGA-2H-A9GI-01A-11R-A37I-31	Yes	435	ESCA	4.60447
TCGA-2H-A9GJ-01A-11R-A37I-31	Yes	1781	ESCA	2.63636
TCGA-2H-A9GK-01A-11R-A37I-31	Yes	232	ESCA	1.42186
TCGA-2H-A9GL-01A-12R-A37I-31	Yes	180	ESCA	0.910963
TCGA-2H-A9GM-01A-11R-A37I-31	Yes	424	ESCA	3.57931
TCGA-2H-A9GN-01A-11R-A37I-31	Yes	272	ESCA	3.17943
TCGA-2H-A9GO-01A-11R-A37I-31	Yes	494	ESCA	1.96905
TCGA-2H-A9GQ-01A-11R-A37I-31	Yes	128	ESCA	6.34143
TCGA-2H-A9GR-01A-12R-A37I-31	Yes	987	ESCA	3.22733
TCGA-2J-AAB1-01A-11R-A41B-07	Yes	66	PAAD	3.43273
TCGA-2J-AAB4-01A-12R-A41B-07	No	729	PAAD	4.30573
TCGA-2J-AAB6-01A-11R-A41B-07	Yes	293	PAAD	3.86717
TCGA-2J-AAB8-01A-12R-A41B-07	No	80	PAAD	4.45807
TCGA-2J-AAB9-01A-11R-A41B-07	Yes	627	PAAD	2.03854
TCGA-2J-AABA-01A-21R-A41B-07	Yes	607	PAAD	3.1203
TCGA-2J-AABE-01A-12R-A41B-07	No	676	PAAD	4.53124
TCGA-2J-AABF-01A-31R-A41B-07	Yes	691	PAAD	2.53104
TCGA-2J-AABH-01A-21R-A41B-07	No	1287	PAAD	5.15717
TCGA-2J-AABI-01A-12R-A41B-07	No	969	PAAD	2.57546
TCGA-2J-AABK-01A-31R-A41B-07	No	484	PAAD	3.80616
TCGA-2J-AABO-01A-21R-A41B-07	No	440	PAAD	2.12895
TCGA-2J-AABP-01A-11R-A41B-07	No	463	PAAD	2.16726
TCGA-2J-AABR-01A-11R-A41B-07	No	438	PAAD	1.77762
TCGA-2J-AABT-01A-11R-A41B-07	No	319	PAAD	3.75253
TCGA-2J-AABU-01A-11R-A41B-07	Yes	277	PAAD	3.49038
TCGA-2J-AABV-01A-12R-A41B-07	Yes	652	PAAD	1.09112
TCGA-2K-A9WE-01A-11R-A38C-07	No	214	KIRP	1.2759
TCGA-2L-AAQA-01A-21R-A38C-07	Yes	143	PAAD	5.34865
TCGA-2L-AAQE-01A-11R-A39D-07	Yes	684	PAAD	2.46344
TCGA-2L-AAQI-01A-12R-A39D-07	Yes	103	PAAD	3.64518
TCGA-2L-AAQJ-01A-12R-A39D-07	Yes	394	PAAD	4.35482
TCGA-2L-AAQL-01A-11R-A38C-07	Yes	292	PAAD	5.43393
TCGA-2L-AAQM-01A-11R-A39D-07	No	1383	PAAD	4.82955
TCGA-2V-A95S-01A-11R-A37K-07	No		LIHC	1.38565
TCGA-2W-A8YY-01A-11R-A37O-07	No	533	CESC	3.87802
TCGA-2X-A9D5-01A-11R-A430-07	No	435	TGCT	3.11016
TCGA-2X-A9D6-01A-11R-A430-07	No	607	TGCT	2.96029
TCGA-2Y-A9GS-01A-12R-A38B-07	Yes	724	LIHC	1.42787
TCGA-2Y-A9GT-01A-11R-A38B-07	Yes	1624	LIHC	0.338339
TCGA-2Y-A9GU-01A-11R-A38B-07	No	1939	LIHC	0.725523
TCGA-2Y-A9GV-01A-11R-A38B-07	Yes	2532	LIHC	0.545079
TCGA-2Y-A9GW-01A-11R-A38B-07	Yes	1271	LIHC	1.12068
TCGA-2Y-A9GX-01A-11R-A38B-07	No	2442	LIHC	0.540722
TCGA-2Y-A9GY-01A-11R-A38B-07	Yes	757	LIHC	2.59684
TCGA-2Y-A9GZ-01A-11R-A39D-07	Yes	848	LIHC	0.788017
TCGA-2Y-A9H0-01A-11R-A38B-07	No	3675	LIHC	1.97255
TCGA-2Y-A9H1-01A-11R-A38B-07	Yes	1229	LIHC	1.49483
TCGA-2Y-A9H2-01A-12R-A38B-07	No	1731	LIHC	1.64432
TCGA-2Y-A9H3-01A-11R-A38B-07	No	1516	LIHC	1.23346
TCGA-2Y-A9H4-01A-11R-A38B-07	No	1452	LIHC	1.0165
TCGA-2Y-A9H5-01A-11R-A38B-07	Yes	555	LIHC	1.9123
TCGA-2Y-A9H6-01A-11R-A39D-07	No	357	LIHC	0.612494
TCGA-2Y-A9H7-01A-11R-A39D-07	No	1168	LIHC	0.720629
TCGA-2Y-A9H8-01A-11R-A39D-07	Yes	633	LIHC	1.45159
TCGA-2Y-A9H9-01A-21R-A39D-07	No	697	LIHC	1.35321
TCGA-2Y-A9HA-01A-11R-A39D-07	Yes	36	LIHC	3.37092
TCGA-2Y-A9HB-01A-11R-A39D-07	No	260	LIHC	1.1516
TCGA-2Z-A9J1-01A-11R-A38C-07	No	2298	KIRP	2.08743
TCGA-2Z-A9J2-01A-11R-A38C-07	No	1795	KIRP	1.30206
TCGA-2Z-A9J3-01A-12R-A38C-07	Yes	1771	KIRP	2.79275
TCGA-2Z-A9J5-01A-21R-A38C-07	No	3050	KIRP	2.28629
TCGA-2Z-A9J6-01A-11R-A38C-07	No	1731	KIRP	2.51468
TCGA-2Z-A9J7-01A-11R-A38C-07	Yes	139	KIRP	2.2216
TCGA-2Z-A9J8-01A-11R-A42S-07	No	2790	KIRP	0.908044
TCGA-2Z-A9J9-01A-11R-A42S-07	No	2294	KIRP	2.83586
TCGA-2Z-A9JD-01A-11R-A42S-07	No	1060	KIRP	0.863621
TCGA-2Z-A9JE-01A-11R-A42S-07	No	1728	KIRP	2.00777
TCGA-2Z-A9JG-01A-11R-A42S-07	No	1662	KIRP	1.43691
TCGA-2Z-A9JI-01A-11R-A42S-07	No	1567	KIRP	1.27417
TCGA-2Z-A9JJ-01A-11R-A42S-07	No	1213	KIRP	2.55582
TCGA-2Z-A9JK-01A-11R-A42S-07	No	1186	KIRP	2.68104
TCGA-2Z-A9JL-01A-11R-A42S-07	No	1006	KIRP	1.30725
TCGA-2Z-A9JM-01A-12R-A42S-07	No	934	KIRP	1.68495
TCGA-2Z-A9JN-01A-21R-A42S-07	No	740	KIRP	0.861558
TCGA-2Z-A9JO-01A-11R-A42S-07	No	949	KIRP	0.679334
TCGA-2Z-A9JP-01A-11R-A42S-07	No	893	KIRP	1.56905
TCGA-2Z-A9JQ-01A-11R-A42S-07	No	778	KIRP	1.98441
TCGA-2Z-A9JR-01A-12R-A42S-07	No	161	KIRP	1.84639
TCGA-2Z-A9JS-01A-21R-A42S-07	No	492	KIRP	1.76141
TCGA-2Z-A9JT-01A-11R-A42S-07	No	684	KIRP	1.35004
TCGA-30-1714-01A-02R-1567-13	Yes	1158	OV	5.36807
TCGA-30-1718-01A-01R-1567-13	Yes	1579	OV	3.09722
TCGA-30-1853-01A-02R-1567-13	Yes	1103	OV	3.21891
TCGA-30-1857-01A-02R-1569-13	Yes	8	OV	4.57226
TCGA-30-1860-01A-01R-1568-13	Yes	1366	OV	2.26487
TCGA-30-1861-01A-01R-1568-13		1058	OV	2.74263
TCGA-30-1862-01A-02R-1568-13	Yes	186	OV	4.42738
TCGA-30-1866-01A-02R-1568-13	Yes	1114	OV	3.0659
TCGA-30-1891-01A-01R-1568-13	Yes	914	OV	3.20325
TCGA-30-1892-01A-01R-1568-13	Yes	1484	OV	2.45531
TCGA-31-1944-01A-01R-1568-13	No	1386	OV	2.43614
TCGA-31-1946-01A-01R-1568-13	No	918	OV	2.72133
TCGA-31-1950-01A-01R-1568-13	No	571	OV	3.88799
TCGA-31-1951-01A-01R-1568-13	No	684	OV	2.04618
TCGA-31-1953-01A-01R-1568-13	No	204	OV	3.0486
TCGA-31-1956-01A-01R-1568-13	No	1342	OV	2.05832
TCGA-31-1959-01A-01R-1568-13	No	67	OV	3.19432
TCGA-32-1970-01A-01R-1850-01	Yes	468	GBM	2.71072
TCGA-32-1980-01A-01R-1850-01	Yes	36	GBM	3.85671
TCGA-32-1982-01A-01R-1850-01	Yes	142	GBM	2.18311
TCGA-32-2615-01A-01R-1850-01	Yes	485	GBM	2.47584
TCGA-32-2616-01A-01R-1850-01	Yes	224	GBM	3.94335
TCGA-32-2632-01A-01R-1850-01	Yes	269	GBM	1.8231
TCGA-32-2634-01A-01R-1850-01	No	693	GBM	3.0494
TCGA-32-2638-01A-01R-1850-01	Yes	766	GBM	2.1661
TCGA-32-4213-01A-01R-1850-01	No	604	GBM	2.52772
TCGA-32-5222-01A-01R-1850-01	Yes	585	GBM	3.1175
TCGA-33-4532-01A-01R-1201-07	No	3924	LUSC	3.60267
TCGA-33-4533-01A-01R-1201-07	No	4068	LUSC	3.49779
TCGA-33-4538-01A-01R-1201-07		2979	LUSC	3.18455
TCGA-33-4547-01A-01R-1201-07	No	2419	LUSC	2.81525
TCGA-33-4566-01A-01R-1443-07		5287	LUSC	3.82943
TCGA-33-4582-01A-01R-1443-07	Yes	3149	LUSC	4.90051
TCGA-33-4583-01A-01R-1443-07	No	4601	LUSC	3.50554
TCGA-33-4586-01A-01R-1443-07		428	LUSC	3.88733
TCGA-33-4587-01A-11R-2125-07	Yes	1656	LUSC	5.67601
TCGA-33-4589-01A-01R-1443-07	No	47	LUSC	2.32285
TCGA-33-6737-01A-11R-1820-07	Yes	601	LUSC	3.13172
TCGA-33-6738-01A-11R-1949-07	No	1927	LUSC	3.12511
TCGA-33-A4WN-01A-11R-A262-07	No	143	LUSC	2.96175
TCGA-33-A5GW-01A-11R-A27Q-07	No	9	LUSC	3.36917
TCGA-33-AAS8-01A-11R-A405-07	No	1114	LUSC	3.07276
TCGA-33-AASB-01A-11R-A405-07	Yes	211	LUSC	4.12136
TCGA-33-AASD-01A-11R-A405-07	Yes	3376	LUSC	3.05396
TCGA-33-AASI-01A-22R-A405-07	Yes	1344	LUSC	2.66218
TCGA-33-AASJ-01A-11R-A405-07	Yes	3600	LUSC	3.82271
TCGA-33-AASL-01A-11R-A405-07	Yes	826	LUSC	3.04264
TCGA-34-2596-01A-01R-0851-07	No	80	LUSC	2.40245
TCGA-34-2600-01A-01R-0851-07	No	1874	LUSC	3.5154
TCGA-34-2608-01A-02R-0851-07	No	1000	LUSC	3.52646
TCGA-34-5231-01A-21R-1820-07	No	1984	LUSC	4.95529
TCGA-34-5232-01A-21R-1820-07	No	2471	LUSC	2.63626
TCGA-34-5234-01A-01R-1635-07	No	2271	LUSC	2.25381
TCGA-34-5236-01A-21R-1820-07	Yes	276	LUSC	4.26493
TCGA-34-5239-01A-21R-1820-07	No	1834	LUSC	4.15988
TCGA-34-5240-01A-01R-1443-07	No	1541	LUSC	2.82295
TCGA-34-5241-01A-01R-1443-07	No	515	LUSC	2.5492
TCGA-34-5927-01A-11R-1820-07	No	1361	LUSC	3.56834
TCGA-34-5928-01A-11R-1820-07	No	1196	LUSC	4.01181
TCGA-34-5929-01A-11R-1820-07	No	151	LUSC	3.85529
TCGA-34-7107-01A-11R-1949-07		34	LUSC	2.1113
TCGA-34-8454-01A-11R-2326-07	No	1180	LUSC	2.91823
TCGA-34-8455-01A-11R-2326-07	Yes	123	LUSC	3.13119
TCGA-34-8456-01A-21R-2326-07	No	804	LUSC	3.8172
TCGA-34-A5IX-01A-12R-A27Q-07	No	1031	LUSC	2.13511
TCGA-35-3615-01A-01R-0946-07	No	14	LUAD	2.11793
TCGA-35-4122-01A-01R-1107-07	No	225	LUAD	2.2652
TCGA-35-4123-01A-01R-1107-07	No	182	LUAD	3.32655
TCGA-35-5375-01A-01R-1628-07	No	264	LUAD	3.676
TCGA-36-1568-01A-01R-1566-13	No	875	OV	3.77588
TCGA-36-1569-01A-01R-1566-13	No	885	OV	3.13926
TCGA-36-1570-01A-01R-1566-13	No	655	OV	2.55643
TCGA-36-1571-01A-01R-1566-13	Yes	695	OV	3.22862
TCGA-36-1574-01A-01R-1566-13	No	686	OV	3.34443
TCGA-36-1576-01A-01R-1566-13	No	915	OV	4.41439
TCGA-36-1577-01A-01R-1566-13	No	783	OV	4.4144
TCGA-36-1580-01A-01R-1566-13	Yes	737	OV	2.45315
TCGA-36-1581-01A-01R-1566-13	No	751	OV	3.14949
TCGA-37-3783-01A-01R-1201-07	No	122	LUSC	3.48984
TCGA-37-3789-01A-01R-0980-07	No	13	LUSC	4.03952
TCGA-37-3792-01A-01R-0980-07	No	12	LUSC	1.80892
TCGA-37-4129-01A-01R-1100-07	No	242	LUSC	5.21419
TCGA-37-4130-01A-01R-1100-07	No	247	LUSC	3.44538
TCGA-37-4132-01A-01R-1100-07	No	227	LUSC	2.47721
TCGA-37-4133-01A-01R-1100-07	No	238	LUSC	3.0513
TCGA-37-4135-01A-01R-1100-07	No	207	LUSC	4.5232
TCGA-37-4141-01A-02R-1100-07	No	12	LUSC	3.53968
TCGA-37-5819-01A-01R-1635-07	No	103	LUSC	3.02089
TCGA-37-A5EL-01A-11R-A26W-07	Yes	1143	LUSC	3.92429
TCGA-37-A5EM-01A-21R-A27Q-07	No	867	LUSC	4.33062
TCGA-37-A5EN-01A-21R-A26W-07	No	660	LUSC	4.92768
TCGA-38-4625-01A-01R-1206-07	No	2973	LUAD	2.31904
TCGA-38-4626-01A-01R-1206-07	No	3674	LUAD	1.31944
TCGA-38-4627-01A-01R-1206-07		1147	LUAD	1.48522
TCGA-38-4628-01A-01R-1206-07	Yes	1492	LUAD	1.86782
TCGA-38-4629-01A-02R-1206-07	Yes	864	LUAD	2.6169
TCGA-38-4630-01A-01R-1206-07	Yes	1073	LUAD	4.79287
TCGA-38-4631-01A-01R-1755-07	Yes	354	LUAD	2.58443
TCGA-38-4632-01A-01R-1755-07	Yes	1357	LUAD	2.78935
TCGA-38-6178-01A-11R-1755-07	No	448	LUAD	3.97279
TCGA-38-7271-01A-11R-2039-07	Yes	800	LUAD	1.67969
TCGA-38-A44F-01A-11R-A24H-07	No	133	LUAD	1.84812
TCGA-39-5011-01A-01R-1443-07	No	4053	LUSC	1.52822
TCGA-39-5016-01A-01R-1443-07	No	3850	LUSC	2.03882
TCGA-39-5019-01A-01R-1820-07	No	3387	LUSC	4.25525
TCGA-39-5021-01A-01R-1443-07	Yes	2086	LUSC	3.35209
TCGA-39-5022-01A-21R-1820-07	No	1679	LUSC	2.38538
TCGA-39-5024-01A-21R-1820-07	No	2510	LUSC	4.64385
TCGA-39-5027-01A-21R-1820-07	No	3108	LUSC	3.73878
TCGA-39-5028-01A-01R-1443-07		52	LUSC	3.65741
TCGA-39-5029-01A-01R-1443-07	Yes	740	LUSC	3.28176
TCGA-39-5030-01A-01R-1443-07		59	LUSC	1.76558
TCGA-39-5031-01A-01R-1443-07	No	1841	LUSC	5.30949
TCGA-39-5034-01A-01R-1443-07		1107	LUSC	2.98096
TCGA-39-5035-01A-01R-1443-07	No	2080	LUSC	4.62932
TCGA-39-5036-01A-01R-1443-07	No	2165	LUSC	2.98408
TCGA-39-5037-01A-01R-1443-07	No	1690	LUSC	6.20933
TCGA-39-5039-01A-01R-1443-07	No	544	LUSC	2.61278
TCGA-39-5040-01A-21R-2125-07	Yes	519	LUSC	2.21083
TCGA-3A-A9I5-01A-11R-A38C-07	No	1794	PAAD	2.87346
TCGA-3A-A9I7-01A-21R-A38C-07	No	1323	PAAD	1.8246
TCGA-3A-A9I9-01A-11R-A38C-07	Yes	634	PAAD	3.91638
TCGA-3A-A9IB-01A-21R-A39D-07		224	PAAD	2.27784
TCGA-3A-A9IC-01A-11R-A38C-07	Yes	738	PAAD	4.14971
TCGA-3A-A9IH-01A-12R-A39D-07	No	1021	PAAD	3.90662
TCGA-3A-A9IJ-01A-11R-A39D-07	No	1854	PAAD	0.825297
TCGA-3A-A9IL-01A-11R-A38C-07	No	2741	PAAD	0.83875
TCGA-3A-A9IN-01A-11R-A39D-07	No	2084	PAAD	2.33959
TCGA-3A-A9IO-01A-11R-A38C-07	No	1942	PAAD	3.03422
TCGA-3A-A9IR-01A-11R-A38C-07	No	1542	PAAD	1.93821
TCGA-3A-A9IS-01A-21R-A39D-07	No	998	PAAD	2.96621
TCGA-3A-A9IU-01A-11R-A39D-07	Yes	458	PAAD	3.2758
TCGA-3A-A9IV-01A-11R-A41B-07	No	1103	PAAD	3.36466
TCGA-3A-A9IX-01A-11R-A41B-07	No	1037	PAAD	2.1107
TCGA-3A-A9IZ-01A-12R-A41B-07	Yes	308	PAAD	4.48081
TCGA-3A-A9J0-01A-11R-A41B-07	No	743	PAAD	3.7878
TCGA-3B-A9HI-01A-11R-A38C-07	No	1521	SARC	3.10918
TCGA-3B-A9HJ-01A-11R-A38C-07	No	1104	SARC	1.06537
TCGA-3B-A9HL-01A-11R-A38C-07	No	599	SARC	0.950244
TCGA-3B-A9HO-01A-11R-A38C-07	No	959	SARC	1.52887
TCGA-3B-A9HP-01A-11R-A38C-07	Yes	1627	SARC	2.72744
TCGA-3B-A9HQ-01A-11R-A38C-07	No	2085	SARC	1.35952
TCGA-3B-A9HR-01A-11R-A38C-07	Yes	2694	SARC	1.08257
TCGA-3B-A9HS-01A-11R-A39D-07	Yes	1366	SARC	2.22512
TCGA-3B-A9HT-01A-11R-A39D-07	No	1665	SARC	1.75467
TCGA-3B-A9HU-01A-11R-A39D-07	No	768	SARC	1.74825
TCGA-3B-A9HV-01A-11R-A39D-07	Yes	437	SARC	3.68351
TCGA-3B-A9HX-01A-11R-A39D-07	No	1303	SARC	3.39883
TCGA-3B-A9HY-01A-11R-A39D-07	No	314	SARC	1.31568
TCGA-3B-A9HZ-01A-11R-A39D-07	No	1170	SARC	1.93934
TCGA-3B-A9I0-01A-11R-A39D-07	No	1096	SARC	1.2383
TCGA-3B-A9I1-01A-11R-A39D-07	Yes	567	SARC	5.06017
TCGA-3B-A9I3-01A-11R-A39D-07	No	808	SARC	2.31063
TCGA-3C-AAAU-01A-11R-A41B-07	No	4047	BRCA	2.65675
TCGA-3C-AALI-01A-11R-A41B-07	No	4005	BRCA	2.82312
TCGA-3C-AALJ-01A-31R-A41B-07	No	1474	BRCA	5.9528
TCGA-3C-AALK-01A-11R-A41B-07	No	1448	BRCA	4.84279
TCGA-3E-AAAY-01A-11R-A38C-07	No	2285	PAAD	3.76618
TCGA-3E-AAAZ-01A-11R-A38C-07	No	2182	PAAD	4.78249
TCGA-3G-AB0O-01A-22R-A42C-07	No	2086	THYM	1.8102
TCGA-3G-AB0Q-01A-11R-A42C-07	No	1799	THYM	1.96993
TCGA-3G-AB0T-01A-11R-A42C-07	Yes	2488	THYM	3.19661
TCGA-3G-AB14-01A-11R-A42C-07	No	775	THYM	3.27468
TCGA-3G-AB19-01A-21R-A42C-07	No	2910	THYM	1.29072
TCGA-3H-AB3K-01A-11R-A40A-07	Yes	1715	MESO	2.33974
TCGA-3H-AB3L-01A-11R-A40A-07	Yes	361	MESO	2.3307
TCGA-3H-AB3M-01A-11R-A40A-07	Yes	885	MESO	2.07073
TCGA-3H-AB3O-01A-11R-A40A-07	Yes	1302	MESO	0.879392
TCGA-3H-AB3S-01A-21R-A40A-07	Yes	385	MESO	2.12981
TCGA-3H-AB3T-01A-11R-A40A-07	Yes	414	MESO	1.3475
TCGA-3H-AB3U-01A-21R-A40A-07	Yes	826	MESO	1.72303
TCGA-3H-AB3X-01A-11R-A40A-07	No	1490	MESO	1.69086
TCGA-3K-AAZ8-01A-12R-A39D-07	No	396	LIHC	1.63575
TCGA-3L-AA1B-01A-11R-A37K-07	No	475	COAD	3.19229
TCGA-3M-AB46-01A-11R-A414-31	No	1765	STAD	3.89303
TCGA-3M-AB47-01A-22R-A414-31	Yes		STAD	1.34795
TCGA-3N-A9WB-06A-11R-A38C-07	Yes	518	SKCM	2.28998
TCGA-3N-A9WC-06A-11R-A38C-07	No	2022	SKCM	1.46832
TCGA-3N-A9WD-06A-11R-A38C-07	Yes	395	SKCM	2.2522
TCGA-3Q-A9WF-01A-11R-A42C-07	No	467	THYM	1.72875
TCGA-3R-A8YX-01A-11R-A37L-07	Yes	17	SARC	2.15277
TCGA-3S-A8YW-01A-11R-A42C-07	No	643	THYM	5.36765
TCGA-3S-AAYX-01A-11R-A42C-07	No	571	THYM	1.9449
TCGA-3T-AA9L-01A-11R-A42C-07	No	1050	THYM	2.87582
TCGA-3U-A98D-01A-12R-A40A-07		142	MESO	2.48592
TCGA-3U-A98E-01A-11R-A40A-07	No	1916	MESO	0.823831
TCGA-3U-A98F-01A-11R-A40A-07	Yes	536	MESO	3.50196
TCGA-3U-A98G-01A-11R-A40A-07	Yes	630	MESO	1.32843
TCGA-3U-A98H-01A-11R-A40A-07	Yes	1156	MESO	1.26267
TCGA-3U-A98I-01A-11R-A40A-07	Yes	860	MESO	1.82725
TCGA-3U-A98J-01A-11R-A40A-07	Yes	741	MESO	2.43795
TCGA-3X-AAV9-01A-72R-A41I-07	Yes	339	CHOL	2.31371
TCGA-3X-AAVA-01A-11R-A41I-07	Yes	445	CHOL	2.53411
TCGA-3X-AAVB-01A-31R-A41I-07	No	402	CHOL	3.84061
TCGA-3X-AAVC-01A-21R-A41I-07	No	709	CHOL	1.488
TCGA-3X-AAVE-01A-11R-A41I-07	No	650	CHOL	0.807272
TCGA-3Z-A93Z-01A-11R-A37O-07	No	385	KIRC	2.58628
TCGA-41-2571-01A-01R-1850-01	Yes	26	GBM	4.22065
TCGA-41-2572-01A-01R-1850-01	Yes	406	GBM	3.23611
TCGA-41-3915-01A-01R-1850-01	Yes	360	GBM	3.10257
TCGA-41-4097-01A-01R-1850-01	Yes	6	GBM	3.1138
TCGA-41-5651-01A-01R-1850-01	Yes	460	GBM	4.33772
TCGA-43-2576-01A-01R-A32Z-07	No	1223	LUSC	3.66651
TCGA-43-2578-01A-01R-0851-07	No	684	LUSC	2.87346
TCGA-43-2581-01A-01R-0851-07	No	1176	LUSC	1.77522
TCGA-43-3394-01A-01R-0980-07	Yes	1190	LUSC	3.9884
TCGA-43-3920-01A-01R-0980-07	No	1007	LUSC	3.19488
TCGA-43-5668-01A-01R-1635-07	Yes	559	LUSC	4.8299
TCGA-43-5670-01A-21R-2125-07	No	849	LUSC	3.25152
TCGA-43-6143-01A-11R-1820-07	No	699	LUSC	3.81833
TCGA-43-6647-01A-11R-1820-07	No	757	LUSC	2.61285
TCGA-43-6770-01A-11R-1820-07	No	653	LUSC	3.61696
TCGA-43-6771-01A-11R-1820-07	Yes	166	LUSC	3.953
TCGA-43-6773-01A-41R-1949-07	No	116	LUSC	2.60502
TCGA-43-7656-01A-11R-2125-07	No	596	LUSC	2.84938
TCGA-43-7657-01A-31R-2125-07	No	236	LUSC	5.37791
TCGA-43-7658-01A-11R-2125-07	Yes	2378	LUSC	4.59346
TCGA-43-8115-01A-11R-2247-07	No	407	LUSC	3.29531
TCGA-43-8116-01A-11R-2247-07	No	358	LUSC	1.60431
TCGA-43-8118-01A-11R-2403-07		89	LUSC	3.09635
TCGA-43-A474-01A-11R-A24H-07	No	353	LUSC	5.11633
TCGA-43-A475-01A-11R-A24H-07	No	296	LUSC	1.60786
TCGA-43-A56U-01A-11R-A26W-07	No	432	LUSC	3.83117
TCGA-43-A56V-01A-11R-A26W-07	No	366	LUSC	4.38723
TCGA-44-2655-01A-01R-0946-07	No	1324	LUAD	3.07149
TCGA-44-2656-01A-02R-0946-07	No	1429	LUAD	2.57529
TCGA-44-2656-01A-02R-A278-07	No	1429	LUAD	1.80789
TCGA-44-2656-01B-06R-A277-07	No	1429	LUAD	1.17402
TCGA-44-2657-01A-01R-1107-07	No	1351	LUAD	1.69706
TCGA-44-2659-01A-01R-0946-07	No	1367	LUAD	1.9452
TCGA-44-2661-01A-01R-1107-07	No	1159	LUAD	1.47301
TCGA-44-2662-01A-01R-0946-07	No	1280	LUAD	3.31195
TCGA-44-2662-01A-01R-A278-07	No	1280	LUAD	1.75886
TCGA-44-2662-01B-02R-A277-07	No	1280	LUAD	0.95017
TCGA-44-2665-01A-01R-0946-07	No	1301	LUAD	3.06324
TCGA-44-2665-01B-06R-A277-07	No	1301	LUAD	2.12118
TCGA-44-2666-01A-01R-0946-07	Yes	97	LUAD	1.81094
TCGA-44-2666-01A-01R-A278-07	Yes	97	LUAD	0.493955
TCGA-44-2666-01B-02R-A277-07	Yes	97	LUAD	0.851599
TCGA-44-2668-01A-01R-0946-07	Yes	761	LUAD	2.81141
TCGA-44-2668-01A-01R-A278-07	Yes	761	LUAD	1.37762
TCGA-44-2668-01B-02R-A277-07	Yes	761	LUAD	1.62714
TCGA-44-3396-01A-01R-1206-07	No	1130	LUAD	2.00205
TCGA-44-3398-01A-01R-1107-07	No	1163	LUAD	2.22743
TCGA-44-3917-01A-01R-A278-07	No	1183	LUAD	0.417488
TCGA-44-3917-01B-02R-A277-07	No	1183	LUAD	1.18916
TCGA-44-3918-01A-01R-1107-07	No	1036	LUAD	3.50578
TCGA-44-3918-01A-01R-A278-07	No	1036	LUAD	2.03238
TCGA-44-3918-01B-02R-A277-07	No	1036	LUAD	2.02645
TCGA-44-3919-01A-02R-1107-07	Yes	1026	LUAD	2.32225
TCGA-44-4112-01A-01R-1107-07	Yes	808	LUAD	4.23977
TCGA-44-4112-01B-06R-A277-07	Yes	808	LUAD	1.82412
TCGA-44-5643-01A-01R-1628-07	No	1013	LUAD	0.928124
TCGA-44-5644-01A-21R-2039-07	No	863	LUAD	2.12499
TCGA-44-5645-01A-01R-1628-07	No	852	LUAD	1.84716
TCGA-44-5645-01A-01R-A278-07	No	852	LUAD	0.723078
TCGA-44-5645-01B-04R-A277-07	No	852	LUAD	0.790939
TCGA-44-6145-01A-11R-1755-07	No	595	LUAD	1.93206
TCGA-44-6146-01A-11R-1755-07	No	728	LUAD	2.06115
TCGA-44-6146-01A-11R-A278-07	No	728	LUAD	1.26837
TCGA-44-6146-01B-04R-A277-07	No	728	LUAD	1.69822
TCGA-44-6147-01A-11R-1755-07	No	845	LUAD	2.95754
TCGA-44-6147-01A-11R-A278-07	No	845	LUAD	1.69786
TCGA-44-6147-01B-06R-A277-07	No	845	LUAD	1.79535
TCGA-44-6148-01A-11R-1755-07	No	704	LUAD	1.22287
TCGA-44-6774-01A-21R-1858-07	No	658	LUAD	1.79327
TCGA-44-6775-01A-11R-1858-07	No	705	LUAD	2.98291
TCGA-44-6775-01A-11R-A278-07	No	705	LUAD	1.83208
TCGA-44-6775-01C-02R-A277-07	No	705	LUAD	1.55582
TCGA-44-6776-01A-11R-1858-07	No	2616	LUAD	2.97741
TCGA-44-6777-01A-11R-1858-07	No	987	LUAD	2.87735
TCGA-44-6778-01A-11R-1858-07	No	1864	LUAD	2.30247
TCGA-44-6779-01A-11R-1858-07	Yes	500	LUAD	2.94759
TCGA-44-7659-01A-11R-2066-07	No	691	LUAD	1.39769
TCGA-44-7660-01A-11R-2066-07	No	592	LUAD	3.4642
TCGA-44-7661-01A-11R-2066-07	Yes	557	LUAD	2.37011
TCGA-44-7662-01A-11R-2066-07	No	218	LUAD	3.97288
TCGA-44-7667-01A-31R-2066-07	No	1097	LUAD	2.12463
TCGA-44-7669-01A-21R-2066-07	Yes	574	LUAD	1.04614
TCGA-44-7670-01A-11R-2066-07	No	882	LUAD	4.9717
TCGA-44-7671-01A-11R-2066-07	No	889	LUAD	2.72179
TCGA-44-7672-01A-11R-2066-07	No	719	LUAD	1.96181
TCGA-44-8117-01A-11R-2241-07	No	385	LUAD	4.88463
TCGA-44-8119-01A-11R-2241-07	No	285	LUAD	2.8507
TCGA-44-8120-01A-11R-2241-07	No	260	LUAD	2.46772
TCGA-44-A479-01A-31R-A24H-07	No	486	LUAD	1.82102
TCGA-44-A47A-01A-21R-A24H-07	No	466	LUAD	2.75585
TCGA-44-A47B-01A-11R-A24H-07	No	287	LUAD	2.09031
TCGA-44-A47G-01A-21R-A24H-07	No	351	LUAD	2.16864
TCGA-44-A4SS-01A-11R-A24X-07	No	415	LUAD	1.42229
TCGA-44-A4SU-01A-11R-A24X-07	Yes	409	LUAD	2.67102
TCGA-46-3765-01A-01R-0980-07	No	405	LUSC	4.06863
TCGA-46-3766-01A-01R-0980-07	No	370	LUSC	2.20417
TCGA-46-3767-01A-01R-0980-07	No	396	LUSC	3.41695
TCGA-46-3768-01A-01R-0980-07	No	299	LUSC	2.37912
TCGA-46-3769-01A-01R-0980-07	No	135	LUSC	1.7427
TCGA-46-6025-01A-11R-1820-07	No	324	LUSC	3.16784
TCGA-46-6026-01A-11R-1820-07	No	423	LUSC	4.61253
TCGA-49-4486-01A-01R-1206-07	Yes	2318	LUAD	2.4889
TCGA-49-4487-01A-21R-1858-07	Yes	855	LUAD	3.57881
TCGA-49-4488-01A-01R-1755-07		869	LUAD	3.79606
TCGA-49-4490-01A-21R-1858-07	Yes	385	LUAD	4.47134
TCGA-49-4494-01A-01R-1206-07	Yes	1081	LUAD	2.93981
TCGA-49-4501-01A-01R-1206-07	Yes	1421	LUAD	2.7772
TCGA-49-4505-01A-01R-1206-07	Yes	428	LUAD	3.03497
TCGA-49-4506-01A-01R-1206-07		999	LUAD	3.16044
TCGA-49-4507-01A-01R-1206-07	Yes	268	LUAD	3.29691
TCGA-49-4510-01A-01R-1206-07	Yes	896	LUAD	3.25426
TCGA-49-4512-01A-21R-1858-07	Yes	905	LUAD	3.95916
TCGA-49-4514-01A-21R-1858-07	No	1700	LUAD	2.26478
TCGA-49-6742-01A-11R-1858-07	Yes	488	LUAD	4.48421
TCGA-49-6743-01A-11R-1858-07	No	1621	LUAD	3.157
TCGA-49-6744-01A-11R-1858-07	No	1683	LUAD	3.10816
TCGA-49-6745-01A-11R-1858-07	No	522	LUAD	1.3111
TCGA-49-6761-01A-31R-1949-07	No	354	LUAD	3.00635
TCGA-49-6767-01A-11R-1858-07	No	677	LUAD	2.65141
TCGA-49-AAQV-01A-11R-A39D-07	No	677	LUAD	3.72677
TCGA-49-AAR0-01A-21R-A39D-07	No	4765	LUAD	2.03094
TCGA-49-AAR2-01A-11R-A39D-07	No	2224	LUAD	3.69393
TCGA-49-AAR3-01A-11R-A41B-07	No	1893	LUAD	1.28434
TCGA-49-AAR4-01A-12R-A41B-07	Yes	879	LUAD	1.50503
TCGA-49-AAR9-01A-21R-A41B-07	Yes	260	LUAD	3.82843
TCGA-49-AARE-01A-11R-A41B-07	Yes	1229	LUAD	2.92408
TCGA-49-AARN-01A-21R-A41B-07		1135	LUAD	4.21905
TCGA-49-AARO-01A-12R-A41B-07	No	3759	LUAD	2.93755
TCGA-49-AARQ-01A-11R-A41B-07	No	6732	LUAD	2.9715
TCGA-49-AARR-01A-11R-A41B-07	No	4992	LUAD	1.14359
TCGA-4A-A93W-01A-11R-A37K-07	No	4	KIRP	2.25749
TCGA-4A-A93X-01A-11R-A37K-07	No	390	KIRP	0.814099
TCGA-4A-A93Y-01A-11R-A37K-07	No	352	KIRP	0.949722
TCGA-4B-A93V-01A-11R-A39D-07	Yes	300	LUAD	3.51272
TCGA-4C-A93U-01A-11R-A39I-07	No	129	THCA	1.62134
TCGA-4E-A92E-01A-11R-A37O-07	No	13	UCEC	3.13042
TCGA-4G-AAZO-01A-12R-A41I-07	No	1177	CHOL	2.04548
TCGA-4G-AAZT-01A-11R-A41I-07	No	420	CHOL	2.07868
TCGA-4H-AAAK-01A-12R-A41B-07	No	348	BRCA	3.41037
TCGA-4J-AA1J-01A-21R-A38B-07	No	542	CESC	5.12799
TCGA-4K-AA1G-01A-11R-A430-07	No	436	TGCT	3.75593
TCGA-4K-AA1H-01A-11R-A430-07	No	518	TGCT	3.05787
TCGA-4K-AA1I-01A-11R-A430-07	No	3	TGCT	3.53116
TCGA-4K-AAAL-01A-11R-A430-07	No	483	TGCT	3.8139
TCGA-4L-AA1F-01A-11R-A41O-07	No	350	PRAD	3.02144
TCGA-4N-A93T-01A-11R-A37K-07	No	146	COAD	6.17269
TCGA-4P-AA8J-01A-11R-A39I-07	No	102	HNSC	3.1159
TCGA-4R-AA8I-01A-11R-A38B-07	Yes	262	LIHC	0.771379
TCGA-4T-AA8H-01A-11R-A41B-07	No	385	COAD	4.84568
TCGA-4V-A9QI-01A-11R-A42C-07	No	2936	THYM	2.93242
TCGA-4V-A9QJ-01A-11R-A42C-07	No	2849	THYM	2.46043
TCGA-4V-A9QL-01A-11R-A42C-07	No	1908	THYM	2.69931
TCGA-4V-A9QM-01A-11R-A42C-07	No	1253	THYM	2.65526
TCGA-4V-A9QN-01A-11R-A42C-07	No	970	THYM	7.63124
TCGA-4V-A9QR-01A-11R-A42C-07	No	780	THYM	2.85798
TCGA-4V-A9QS-01A-11R-A42C-07	No	774	THYM	2.2394
TCGA-4V-A9QT-01A-11R-A42C-07	No	813	THYM	1.75583
TCGA-4V-A9QU-01A-11R-A42C-07	No	627	THYM	2.792
TCGA-4V-A9QW-01A-11R-A42C-07	No	630	THYM	2.48305
TCGA-4V-A9QX-01A-11R-A42C-07	No	434	THYM	2.43528
TCGA-4X-A9F9-01A-11R-A42C-07	No	669	THYM	2.43576
TCGA-4X-A9FA-01A-11R-A42C-07	No	392	THYM	1.72992
TCGA-4X-A9FB-01A-11R-A42C-07	No	717	THYM	1.49846
TCGA-4X-A9FC-01A-11R-A42C-07	No	2072	THYM	2.60117
TCGA-4X-A9FD-01A-11R-A42C-07	No	1503	THYM	5.15531
TCGA-4Z-AA7M-01A-11R-A39I-07	No	495	BLCA	2.53042
TCGA-4Z-AA7N-01A-11R-A39I-07	No	1367	BLCA	2.56145
TCGA-4Z-AA7O-01A-31R-A39I-07	No	512	BLCA	3.51855
TCGA-4Z-AA7Q-01A-11R-A39I-07	No	510	BLCA	1.66948
TCGA-4Z-AA7R-01A-11R-A39I-07	Yes	522	BLCA	2.67066
TCGA-4Z-AA7S-01A-11R-A39I-07	No	1064	BLCA	3.90306
TCGA-4Z-AA7W-01A-11R-A39I-07	No	840	BLCA	2.35361
TCGA-4Z-AA7Y-01A-11R-A39I-07	No	1522	BLCA	3.11615
TCGA-4Z-AA80-01A-11R-A39I-07	No	19	BLCA	3.45449
TCGA-4Z-AA81-01A-11R-A39I-07	No	1270	BLCA	2.54582
TCGA-4Z-AA82-01A-11R-A39I-07	Yes	1556	BLCA	1.62635
TCGA-4Z-AA83-01A-11R-A39I-07	No	2024	BLCA	2.35716
TCGA-4Z-AA84-01A-11R-A39I-07	No	460	BLCA	3.31796
TCGA-4Z-AA86-01A-11R-A39I-07	Yes	311	BLCA	2.76929
TCGA-4Z-AA87-01A-11R-A39I-07	No	1454	BLCA	2.38018
TCGA-4Z-AA89-01A-11R-A39I-07	No	1029	BLCA	2.66332
TCGA-50-5044-01A-21R-1858-07	Yes	624	LUAD	2.05384
TCGA-50-5045-01A-01R-1628-07	Yes	2174	LUAD	2.51003
TCGA-50-5049-01A-01R-1628-07	No	3094	LUAD	1.55503
TCGA-50-5051-01A-21R-1858-07	Yes	478	LUAD	2.53822
TCGA-50-5055-01A-01R-1628-07	Yes	1830	LUAD	1.95513
TCGA-50-5066-01A-01R-1628-07	No	1442	LUAD	2.13333
TCGA-50-5066-02A-11R-2090-07	No	1442	LUAD	3.16545
TCGA-50-5068-01A-01R-1628-07	Yes	1499	LUAD	2.59917
TCGA-50-5072-01A-21R-1858-07	Yes	250	LUAD	3.21017
TCGA-50-5930-01A-11R-1755-07	Yes	282	LUAD	4.49348
TCGA-50-5931-01A-11R-1755-07	Yes	434	LUAD	3.16832
TCGA-50-5932-01A-11R-1755-07	Yes	1235	LUAD	2.81256
TCGA-50-5933-01A-11R-1755-07	No	2393	LUAD	2.80976
TCGA-50-5935-01A-11R-1755-07	No	653	LUAD	3.84844
TCGA-50-5936-01A-11R-1628-07	Yes	257	LUAD	3.0204
TCGA-50-5939-01A-11R-1628-07	No	460	LUAD	2.30722
TCGA-50-5941-01A-11R-1755-07	No	1474	LUAD	4.19675
TCGA-50-5942-01A-21R-1755-07	No	1847	LUAD	1.25332
TCGA-50-5944-01A-11R-1755-07	No	1750	LUAD	1.78388
TCGA-50-5946-01A-11R-1755-07	No	1617	LUAD	3.94854
TCGA-50-5946-02A-11R-2090-07	No	1617	LUAD	3.27163
TCGA-50-6590-01A-12R-1858-07	No	1288	LUAD	1.26081
TCGA-50-6591-01A-11R-1755-07	Yes	119	LUAD	3.01584
TCGA-50-6592-01A-11R-1755-07	Yes	777	LUAD	2.67751
TCGA-50-6593-01A-11R-1755-07	Yes	336	LUAD	2.82463
TCGA-50-6594-01A-11R-1755-07	Yes	370	LUAD	2.7371
TCGA-50-6595-01A-12R-1858-07	Yes	189	LUAD	2.28072
TCGA-50-6597-01A-11R-1858-07	No	1268	LUAD	3.85966
TCGA-50-6673-01A-11R-1949-07		22	LUAD	2.68661
TCGA-50-7109-01A-11R-2039-07	Yes	308	LUAD	2.06795
TCGA-50-8457-01A-11R-2326-07	No	1125	LUAD	1.84008
TCGA-50-8459-01A-11R-2326-07	No	1119	LUAD	3.16528
TCGA-50-8460-01A-11R-2326-07	No	829	LUAD	2.86279
TCGA-51-4079-01A-01R-1100-07		12	LUSC	3.99411
TCGA-51-4080-01A-01R-1100-07	No	12	LUSC	2.48011
TCGA-51-4081-01A-01R-1100-07	No	911	LUSC	3.63502
TCGA-51-6867-01A-11R-2045-07	Yes	1856	LUSC	3.50916
TCGA-52-7622-01A-11R-2125-07	No	862	LUSC	2.84685
TCGA-52-7809-01A-21R-2125-07	Yes	166	LUSC	4.15541
TCGA-52-7810-01A-11R-2125-07	No	923	LUSC	4.41491
TCGA-52-7811-01A-11R-2125-07	Yes	266	LUSC	3.94921
TCGA-52-7812-01A-11R-2125-07	Yes	835	LUSC	2.53142
TCGA-53-7624-01A-11R-2066-07	Yes	1043	LUAD	2.78921
TCGA-53-7626-01A-12R-2066-07	Yes	929	LUAD	1.39171
TCGA-53-7813-01A-11R-2170-07	No	424	LUAD	2.26315
TCGA-53-A4EZ-01A-12R-A24X-07	No	1071	LUAD	2.73407
TCGA-55-1592-01A-01R-0946-07	Yes	701	LUAD	4.72918
TCGA-55-1594-01A-01R-0946-07	No	1178	LUAD	1.9318
TCGA-55-1595-01A-01R-0946-07	No	1479	LUAD	2.84573
TCGA-55-1596-01A-01R-0946-07	No	2065	LUAD	2.93723
TCGA-55-5899-01A-11R-1628-07	No	930	LUAD	2.61254
TCGA-55-6543-01A-11R-1755-07	No	435	LUAD	2.2643
TCGA-55-6642-01A-11R-1858-07	No	2449	LUAD	2.31887
TCGA-55-6712-01A-11R-1858-07	Yes	171	LUAD	2.30638
TCGA-55-6968-01A-11R-1949-07	Yes	1293	LUAD	2.04019
TCGA-55-6969-01A-11R-1949-07	No	1239	LUAD	2.57628
TCGA-55-6970-01A-11R-1949-07	Yes	464	LUAD	3.39057
TCGA-55-6971-01A-11R-1949-07	No	1400	LUAD	1.97453
TCGA-55-6972-01A-11R-1949-07	No	1632	LUAD	2.529
TCGA-55-6975-01A-11R-1949-07	Yes	118	LUAD	3.86652
TCGA-55-6978-01A-11R-1949-07	Yes	176	LUAD	1.47856
TCGA-55-6979-01A-11R-1949-07	Yes	237	LUAD	2.4225
TCGA-55-6980-01A-11R-1949-07	No	2109	LUAD	2.59316
TCGA-55-6981-01A-11R-1949-07	No	1379	LUAD	2.20423
TCGA-55-6982-01A-11R-1949-07	Yes	995	LUAD	2.06416
TCGA-55-6983-01A-11R-1949-07	No	2823	LUAD	2.18485
TCGA-55-6984-01A-11R-1949-07	Yes	760	LUAD	4.40725
TCGA-55-6985-01A-11R-1949-07	No	1233	LUAD	3.11779
TCGA-55-6986-01A-11R-1949-07	No	3261	LUAD	1.48743
TCGA-55-6987-01A-11R-1949-07	No	2137	LUAD	3.11298
TCGA-55-7227-01A-11R-2039-07	Yes	952	LUAD	2.35267
TCGA-55-7281-01A-11R-2039-07	No	872	LUAD	3.15476
TCGA-55-7283-01A-11R-2039-07	No	609	LUAD	2.3382
TCGA-55-7284-01B-11R-2241-07	Yes	243	LUAD	2.53386
TCGA-55-7570-01A-11R-2039-07	No	824	LUAD	3.37266
TCGA-55-7573-01A-11R-2039-07	No	487	LUAD	2.58084
TCGA-55-7574-01A-11R-2039-07	Yes	995	LUAD	2.20417
TCGA-55-7576-01A-11R-2066-07	No	670	LUAD	3.04782
TCGA-55-7724-01A-11R-2170-07	No	705	LUAD	4.08916
TCGA-55-7725-01A-11R-2170-07	No	442	LUAD	1.76375
TCGA-55-7726-01A-11R-2170-07	No	652	LUAD	2.52115
TCGA-55-7727-01A-11R-2170-07	No	119	LUAD	3.31742
TCGA-55-7728-01A-11R-2187-07	No	704	LUAD	2.06953
TCGA-55-7815-01A-11R-2170-07	No	773	LUAD	2.86509
TCGA-55-7816-01A-11R-2170-07	Yes	468	LUAD	1.56793
TCGA-55-7903-01A-11R-2170-07	No	567	LUAD	4.24387
TCGA-55-7907-01A-11R-2170-07	Yes	343	LUAD	2.45909
TCGA-55-7910-01A-11R-2170-07	No	1040	LUAD	3.17441
TCGA-55-7911-01A-11R-2170-07	No	537	LUAD	1.55351
TCGA-55-7913-01B-11R-2241-07	Yes	561	LUAD	4.21774
TCGA-55-7914-01A-11R-2170-07	Yes	187	LUAD	2.07731
TCGA-55-7994-01A-11R-2187-07	No	603	LUAD	3.23449
TCGA-55-7995-01A-11R-2187-07	No	889	LUAD	3.15462
TCGA-55-8085-01A-11R-2241-07	No	904	LUAD	4.40406
TCGA-55-8087-01A-11R-2241-07	No	462	LUAD	2.4729
TCGA-55-8089-01A-11R-2241-07	No	702	LUAD	1.79523
TCGA-55-8090-01A-11R-2241-07	Yes	598	LUAD	2.38855
TCGA-55-8091-01A-11R-2241-07	No	600	LUAD	2.64386
TCGA-55-8092-01A-11R-2241-07	Yes	154	LUAD	3.52093
TCGA-55-8094-01A-11R-2241-07	No	541	LUAD	2.86979
TCGA-55-8096-01A-11R-2241-07	Yes	719	LUAD	2.82607
TCGA-55-8097-01A-11R-2241-07	No	476	LUAD	1.66143
TCGA-55-8203-01A-11R-2241-07	No	547	LUAD	2.78559
TCGA-55-8204-01A-11R-2241-07	No	515	LUAD	2.24604
TCGA-55-8205-01A-11R-2241-07	No	599	LUAD	1.28534
TCGA-55-8206-01A-11R-2241-07	No	888	LUAD	1.69546
TCGA-55-8207-01A-11R-2241-07	No	977	LUAD	1.91142
TCGA-55-8208-01A-11R-2241-07	No	674	LUAD	1.97166
TCGA-55-8299-01A-11R-2287-07	Yes	469	LUAD	2.10668
TCGA-55-8301-01A-11R-2287-07	No	534	LUAD	3.67024
TCGA-55-8302-01A-11R-2326-07	No	478	LUAD	2.3958
TCGA-55-8505-01A-11R-2403-07	No	440	LUAD	4.77482
TCGA-55-8506-01A-11R-2403-07	No	11	LUAD	6.00591
TCGA-55-8507-01A-11R-2403-07	No	418	LUAD	4.2286
TCGA-55-8508-01A-11R-2403-07	No	617	LUAD	1.56418
TCGA-55-8510-01A-11R-2403-07	No	539	LUAD	2.60542
TCGA-55-8511-01A-11R-2403-07	No	552	LUAD	2.75119
TCGA-55-8512-01A-11R-2403-07	Yes	607	LUAD	1.67102
TCGA-55-8513-01A-11R-2403-07	No	791	LUAD	1.76553
TCGA-55-8514-01A-11R-2403-07	No	520	LUAD	4.78209
TCGA-55-8614-01A-11R-2403-07	No	536	LUAD	4.0781
TCGA-55-8615-01A-11R-2403-07	No	446	LUAD	1.92281
TCGA-55-8616-01A-11R-2403-07	No	48	LUAD	3.84207
TCGA-55-8619-01A-11R-2403-07	No	416	LUAD	3.17599
TCGA-55-8620-01A-11R-2403-07	Yes	375	LUAD	3.45331
TCGA-55-8621-01A-11R-2403-07	No	515	LUAD	1.55964
TCGA-55-A48X-01A-11R-A24H-07	No	689	LUAD	2.28475
TCGA-55-A48Y-01A-11R-A24H-07	No	630	LUAD	2.77463
TCGA-55-A48Z-01A-12R-A24X-07	No	651	LUAD	4.07886
TCGA-55-A490-01A-11R-A466-07	No	99	LUAD	3.0621
TCGA-55-A491-01A-11R-A24H-07	No	626	LUAD	3.27981
TCGA-55-A492-01A-11R-A24H-07	No	596	LUAD	3.18164
TCGA-55-A493-01A-11R-A24H-07	No	28	LUAD	1.87927
TCGA-55-A494-01A-11R-A24X-07	No	481	LUAD	2.33136
TCGA-55-A4DF-01A-11R-A24H-07	Yes	614	LUAD	2.90313
TCGA-55-A4DG-01A-11R-A24H-07	No	608	LUAD	2.02963
TCGA-55-A57B-01A-12R-A39D-07	No	546	LUAD	3.23802
TCGA-56-1622-01A-01R-0692-07	Yes	881	LUSC	2.70162
TCGA-56-5897-01A-11R-1635-07	No	378	LUSC	1.9087
TCGA-56-5898-01A-11R-1635-07	No	555	LUSC	4.80742
TCGA-56-6545-01A-11R-1820-07	No	666	LUSC	2.93768
TCGA-56-6546-01A-11R-1820-07	No		LUSC	4.0573
TCGA-56-7221-01A-11R-2045-07	No	608	LUSC	5.35125
TCGA-56-7222-01A-11R-2045-07	Yes	562	LUSC	2.66551
TCGA-56-7223-01A-11R-2045-07	Yes	442	LUSC	5.61085
TCGA-56-7579-01A-11R-2045-07	Yes	951	LUSC	5.65254
TCGA-56-7580-01A-11R-2045-07	No	925	LUSC	4.17371
TCGA-56-7582-01A-11R-2045-07	No	601	LUSC	3.48486
TCGA-56-7730-01A-11R-2125-07	Yes	198	LUSC	4.33002
TCGA-56-7731-01A-11R-2125-07	No	3	LUSC	3.09295
TCGA-56-7822-01A-11R-2125-07	Yes	532	LUSC	3.37783
TCGA-56-7823-01B-11R-2247-07	No	1011	LUSC	3.80485
TCGA-56-8082-01A-11R-2247-07	No	455	LUSC	2.12327
TCGA-56-8083-01A-11R-2247-07	No	150	LUSC	4.77478
TCGA-56-8201-01A-11R-2247-07	Yes	397	LUSC	2.26864
TCGA-56-8304-01A-11R-2326-07	No	106	LUSC	3.3497
TCGA-56-8305-01A-11R-2296-07	No	105	LUSC	4.9456
TCGA-56-8307-01A-11R-2296-07	No	818	LUSC	1.6035
TCGA-56-8308-01A-11R-2296-07	No	517	LUSC	4.93725
TCGA-56-8309-01A-11R-2296-07	No	428	LUSC	2.14192
TCGA-56-8503-01A-11R-2403-07	No	41	LUSC	3.01568
TCGA-56-8504-01A-11R-2403-07	No	510	LUSC	2.23918
TCGA-56-8622-01A-11R-2403-07	No	55	LUSC	6.59322
TCGA-56-8623-01A-11R-A28V-07	No	692	LUSC	1.02935
TCGA-56-8624-01A-11R-2403-07	No	420	LUSC	6.69735
TCGA-56-8625-01A-11R-2403-07	Yes	315	LUSC	2.69917
TCGA-56-8626-01A-11R-2403-07	No	302	LUSC	3.0982
TCGA-56-8628-01A-11R-2403-07	No	616	LUSC	3.13532
TCGA-56-8629-01A-11R-2403-07	No	481	LUSC	4.27318
TCGA-56-A49D-01A-11R-A24H-07	No	637	LUSC	4.1874
TCGA-56-A4BW-01A-11R-A24H-07	No	585	LUSC	3.20439
TCGA-56-A4BX-01A-11R-A24H-07	No	405	LUSC	5.03271
TCGA-56-A4BY-01A-11R-A24H-07	Yes	543	LUSC	5.29196
TCGA-56-A4ZJ-01A-11R-A262-07	No	640	LUSC	3.26245
TCGA-56-A4ZK-01A-11R-A262-07	No	570	LUSC	4.73763
TCGA-56-A5DR-01A-11R-A27Q-07	No	4	LUSC	3.83186
TCGA-56-A5DS-01A-11R-A27Q-07	No	8	LUSC	3.40573
TCGA-56-A62T-01A-11R-A405-07	No	440	LUSC	3.81909
TCGA-57-1582-01A-01R-1566-13	Yes	731	OV	3.36704
TCGA-57-1583-01A-01R-1566-13	Yes	346	OV	3.65667
TCGA-57-1584-01A-01R-1566-13	No	643	OV	2.82206
TCGA-57-1585-01A-01R-1566-13	Yes	53	OV	3.82662
TCGA-57-1586-01A-02R-1567-13	No	679	OV	4.30694
TCGA-57-1993-01A-01R-1568-13	No	763	OV	2.43411
TCGA-57-1994-01A-01R-1568-13	No	761	OV	3.33279
TCGA-58-8386-01A-11R-2296-07	No	1	LUSC	4.02223
TCGA-58-8387-01A-11R-2296-07	No	403	LUSC	2.74306
TCGA-58-8388-01A-11R-2326-07	No	412	LUSC	4.86412
TCGA-58-8390-01A-11R-2326-07	No	911	LUSC	6.10548
TCGA-58-8391-01A-11R-2326-07	No	2167	LUSC	4.47493
TCGA-58-8392-01A-11R-2326-07	Yes	501	LUSC	4.45771
TCGA-58-8393-01A-11R-2326-07	No	1058	LUSC	2.8907
TCGA-58-A46J-01A-11R-A24H-07	No	2589	LUSC	3.56407
TCGA-58-A46K-01A-11R-A24H-07	Yes	1045	LUSC	2.68598
TCGA-58-A46L-01A-11R-A24H-07	No	1723	LUSC	4.81909
TCGA-58-A46M-01A-11R-A24H-07	No	1072	LUSC	3.75044
TCGA-58-A46N-01A-11R-A24H-07	No	910	LUSC	3.8188
TCGA-59-2348-01A-01R-1569-13	No	5481	OV	2.40858
TCGA-59-2350-01A-01R-1569-13	Yes	679	OV	2.25951
TCGA-59-2351-01A-01R-1569-13	No	3532	OV	1.88014
TCGA-59-2352-01A-01R-1569-13	Yes	286	OV	2.9052
TCGA-59-2354-01A-01R-1569-13	Yes	1046	OV	3.95527
TCGA-59-2355-01A-01R-1569-13	Yes	65	OV	2.72223
TCGA-59-2363-01A-01R-1569-13	No	165	OV	3.03161
TCGA-59-A5PD-01A-11R-A406-31	Yes	624	OV	4.8911
TCGA-5B-A90C-01A-11R-A37O-07	No	1202	UCEC	4.56498
TCGA-5C-A9VG-01A-11R-A37K-07	No	328	LIHC	1.0695
TCGA-5C-A9VH-01A-11R-A37K-07	No	322	LIHC	1.25852
TCGA-5C-AAPD-01A-21R-A39D-07	No	20	LIHC	2.08325
TCGA-5G-A9ZZ-01A-31R-A42C-07	No	835	THYM	2.60897
TCGA-5K-AAAP-01A-11R-A42C-07	No	1054	THYM	3.21703
TCGA-5L-AAT0-01A-12R-A41B-07	No	1477	BRCA	3.75054
TCGA-5L-AAT1-01A-12R-A41B-07	No	1471	BRCA	3.86271
TCGA-5M-AAT4-01A-11R-A41B-07	Yes	49	COAD	5.621
TCGA-5M-AAT6-01A-11R-A41B-07	Yes	290	COAD	3.6067
TCGA-5M-AATE-01A-11R-A41B-07	No	1200	COAD	5.09826
TCGA-5N-A9KI-01A-31R-A42T-07	No	76	BLCA	4.60924
TCGA-5N-A9KM-01A-11R-A42T-07	Yes	530	BLCA	2.41695
TCGA-5P-A9JU-01A-11R-A42S-07	No	373	KIRP	2.13659
TCGA-5P-A9JV-01A-12R-A42S-07	No	2043	KIRP	2.43651
TCGA-5P-A9JW-01A-11R-A42S-07	No	3241	KIRP	1.36608
TCGA-5P-A9JY-01A-11R-A42S-07	No	1508	KIRP	2.68921
TCGA-5P-A9JZ-01A-11R-A42S-07	No	2744	KIRP	1.48491
TCGA-5P-A9K0-01A-11R-A42S-07	No	677	KIRP	1.30077
TCGA-5P-A9K2-01A-11R-A42S-07	No	2392	KIRP	2.45864
TCGA-5P-A9K3-01A-11R-A42S-07	Yes	471	KIRP	0.853517
TCGA-5P-A9K4-01A-11R-A42S-07	No	2184	KIRP	2.95343
TCGA-5P-A9K6-01A-11R-A42S-07	No	1914	KIRP	1.40174
TCGA-5P-A9K8-01A-11R-A42S-07	No	1309	KIRP	1.22823
TCGA-5P-A9K9-01A-11R-A42S-07	Yes	589	KIRP	1.2664
TCGA-5P-A9KA-01A-11R-A42S-07	No	395	KIRP	1.16401
TCGA-5P-A9KC-01A-11R-A42S-07	No	377	KIRP	1.47649
TCGA-5P-A9KE-01A-11R-A42S-07	No	824	KIRP	1.65067
TCGA-5P-A9KF-01A-11R-A42S-07	No	845	KIRP	1.95999
TCGA-5P-A9KH-01A-11R-A42S-07	No	2051	KIRP	0.317304
TCGA-5R-AA1C-01A-11R-A41C-07	No	520	LIHC	1.0706
TCGA-5R-AA1D-01A-11R-A38B-07	No	449	LIHC	2.40302
TCGA-5R-AAAM-01A-12R-A41C-07	No	46	LIHC	1.29125
TCGA-5S-A9Q8-01A-11R-A40A-07	No	313	UCEC	3.59069
TCGA-5T-A9QA-01A-11R-A41B-07	No	303	BRCA	2.48944
TCGA-5U-AB0D-01A-11R-A42C-07	No	714	THYM	6.28326
TCGA-5U-AB0E-01A-11R-A42C-07	No	687	THYM	1.75911
TCGA-5U-AB0F-01A-11R-A42C-07	No	459	THYM	2.33285
TCGA-5V-A9RR-01A-11R-A42C-07	No	827	THYM	3.28438
TCGA-5X-AA5U-01A-11R-A406-31	No	361	OV	3.41926
TCGA-60-2695-01A-01R-0851-07	No	642	LUSC	4.65389
TCGA-60-2696-01A-01R-0851-07		109	LUSC	2.84437
TCGA-60-2697-01A-11R-2125-07	Yes	372	LUSC	1.42078
TCGA-60-2698-01A-01R-0851-07	Yes	311	LUSC	3.47673
TCGA-60-2703-01A-11R-2045-07		2945	LUSC	3.78058
TCGA-60-2704-01A-11R-2045-07	Yes	1154	LUSC	1.83224
TCGA-60-2706-01A-01R-0851-07	No	2820	LUSC	4.93786
TCGA-60-2707-01A-01R-0851-07	Yes	667	LUSC	3.80739
TCGA-60-2708-01A-01R-0851-07	No	2447	LUSC	3.54123
TCGA-60-2709-01A-21R-1820-07	No	1505	LUSC	2.34959
TCGA-60-2710-01A-01R-0851-07	No	2024	LUSC	2.77747
TCGA-60-2711-01A-01R-0851-07	No	1260	LUSC	2.56179
TCGA-60-2712-01A-01R-0851-07		274	LUSC	1.92919
TCGA-60-2713-01A-01R-0851-07	No	1731	LUSC	2.25051
TCGA-60-2714-01A-01R-0851-07	No	1531	LUSC	3.17262
TCGA-60-2715-01A-01R-0851-07	Yes	1075	LUSC	2.95522
TCGA-60-2716-01A-01R-0851-07	No	1475	LUSC	3.36373
TCGA-60-2719-01A-01R-0851-07	No	1297	LUSC	2.46929
TCGA-60-2720-01A-01R-0851-07	No	97	LUSC	3.50587
TCGA-60-2721-01A-01R-0851-07	No	983	LUSC	3.14648
TCGA-60-2722-01A-01R-0851-07	No	908	LUSC	5.01256
TCGA-60-2723-01A-01R-0851-07	No	1092	LUSC	2.93719
TCGA-60-2724-01A-01R-0851-07	No	717	LUSC	3.38377
TCGA-60-2725-01A-01R-1201-07	No	816	LUSC	2.10104
TCGA-60-2726-01A-01R-0851-07	No	358	LUSC	3.91853
TCGA-61-1721-01A-01R-1569-13	No	338	OV	2.31985
TCGA-61-1724-01A-01R-1568-13	Yes	637	OV	3.53047
TCGA-61-1725-01A-01R-1567-13	No	956	OV	2.77722
TCGA-61-1728-01A-01R-1568-13	No	848	OV	3.35238
TCGA-61-1733-01A-01R-1567-13	No	967	OV	4.55313
TCGA-61-1736-01B-01R-1568-13	Yes	1484	OV	1.62644
TCGA-61-1737-01A-01R-1567-13	No	1364	OV	3.24522
TCGA-61-1738-01A-01R-1567-13	Yes	1089	OV	2.95715
TCGA-61-1741-01A-02R-1567-13	Yes	1024	OV	3.43253
TCGA-61-1900-01A-01R-1567-13	No	176	OV	5.2605
TCGA-61-1907-01A-01R-1567-13	No	952	OV	2.32921
TCGA-61-1910-01A-01R-1567-13	No	1127	OV	3.13549
TCGA-61-1911-01A-01R-1567-13	No	1293	OV	3.57672
TCGA-61-1914-01A-01R-1567-13	No	1722	OV	2.67879
TCGA-61-1918-01A-01R-1568-13	Yes	479	OV	2.77568
TCGA-61-1919-01A-01R-1568-13		1161	OV	2.71411
TCGA-61-1995-01A-01R-1568-13	No	61	OV	1.88866
TCGA-61-1998-01A-01R-1568-13	No	168	OV	2.62483
TCGA-61-2000-01A-01R-1568-13	No	441	OV	2.58029
TCGA-61-2002-01A-01R-1568-13	No	547	OV	2.53434
TCGA-61-2003-01A-01R-1568-13	No	122	OV	2.75779
TCGA-61-2008-01A-02R-1568-13	No	932	OV	4.42791
TCGA-61-2008-02A-01R-1568-13	No	932	OV	3.74949
TCGA-61-2009-01A-01R-1568-13	No	1212	OV	5.25627
TCGA-61-2012-01A-01R-1568-13	No	932	OV	4.03356
TCGA-61-2088-01A-01R-1568-13	No	145	OV	2.96122
TCGA-61-2092-01A-01R-1568-13	No	1573	OV	3.26069
TCGA-61-2097-01A-02R-1568-13	No	1844	OV	3.23886
TCGA-61-2098-01A-01R-1568-13	No	1993	OV	5.58164
TCGA-61-2101-01A-01R-1568-13	Yes	1688	OV	4.67158
TCGA-61-2102-01A-01R-1568-13	Yes	197	OV	3.94132
TCGA-61-2104-01A-01R-1568-13	No	2338	OV	4.01927
TCGA-61-2109-01A-01R-1568-13	Yes	629	OV	2.41832
TCGA-61-2110-01A-01R-1568-13	Yes	1354	OV	2.72419
TCGA-61-2111-01A-01R-1568-13	No	3825	OV	3.12819
TCGA-61-2113-01A-01R-1568-13		676	OV	3.55051
TCGA-62-8394-01A-11R-2326-07	No	139	LUAD	3.53284
TCGA-62-8395-01A-11R-2326-07	No	1216	LUAD	2.16392
TCGA-62-8397-01A-11R-2326-07	No	1289	LUAD	2.15982
TCGA-62-8398-01A-11R-2326-07	No	444	LUAD	2.93074
TCGA-62-8399-01A-21R-2326-07	No	2696	LUAD	3.64349
TCGA-62-8402-01A-11R-2326-07	Yes	1498	LUAD	1.87708
TCGA-62-A46O-01A-11R-A24H-07	Yes	1454	LUAD	2.01443
TCGA-62-A46P-01A-11R-A24H-07	No	594	LUAD	3.16018
TCGA-62-A46R-01A-11R-A24H-07	No	1725	LUAD	2.07881
TCGA-62-A46S-01A-11R-A24H-07	Yes	1653	LUAD	1.77497
TCGA-62-A46U-01A-11R-A24H-07	No	2067	LUAD	3.25276
TCGA-62-A46V-01A-11R-A24H-07	No	2199	LUAD	3.08689
TCGA-62-A46Y-01A-11R-A24H-07	Yes	414	LUAD	2.30926
TCGA-62-A470-01A-11R-A24H-07	Yes	1194	LUAD	3.17798
TCGA-62-A471-01A-12R-A24H-07	No	1246	LUAD	3.95156
TCGA-62-A472-01A-11R-A24H-07	No	910	LUAD	2.78404
TCGA-63-5128-01A-01R-1443-07	Yes		LUSC	4.75907
TCGA-63-5131-01A-01R-1443-07	No		LUSC	4.1209
TCGA-63-6202-01A-11R-1820-07	No	1602	LUSC	2.18688
TCGA-63-7020-01A-11R-1949-07	No	2133	LUSC	3.66405
TCGA-63-7021-01A-11R-1949-07	No	2142	LUSC	3.85257
TCGA-63-7022-01A-11R-1949-07	No	2073	LUSC	2.78651
TCGA-63-7023-01A-11R-1949-07	No	1682	LUSC	1.87916
TCGA-63-A5M9-01A-11R-A26W-07	No	0	LUSC	3.28783
TCGA-63-A5MB-01A-11R-A26W-07	No	3123	LUSC	3.13106
TCGA-63-A5MG-01A-12R-A27Q-07	No	2148	LUSC	3.47651
TCGA-63-A5MH-01A-12R-A27Q-07	No	2026	LUSC	4.32276
TCGA-63-A5MI-01A-12R-A27Q-07	No	1784	LUSC	3.09884
TCGA-63-A5MJ-01A-11R-A27Q-07	No	1824	LUSC	3.45713
TCGA-63-A5ML-01A-31R-A27Q-07	No	1386	LUSC	2.24489
TCGA-63-A5MM-01A-11R-A26W-07	Yes	456	LUSC	2.65005
TCGA-63-A5MN-01A-22R-A27Q-07	Yes	345	LUSC	1.25671
TCGA-63-A5MP-01A-11R-A26W-07	No	769	LUSC	2.2988
TCGA-63-A5MR-01A-31R-A27Q-07	No	2716	LUSC	3.84189
TCGA-63-A5MS-01A-11R-A26W-07	No	2381	LUSC	3.45087
TCGA-63-A5MT-01A-21R-A26W-07	No	498	LUSC	3.49912
TCGA-63-A5MU-01A-11R-A26W-07	Yes		LUSC	4.24595
TCGA-63-A5MV-01A-21R-A26W-07	No	1100	LUSC	3.75823
TCGA-63-A5MW-01A-11R-A26W-07	No	1639	LUSC	4.39689
TCGA-63-A5MY-01A-11R-A26W-07	No	1052	LUSC	5.2584
TCGA-64-1676-01A-01R-0946-07	No	1728	LUAD	3.81601
TCGA-64-1677-01A-01R-0946-07		628	LUAD	2.62028
TCGA-64-1678-01A-01R-0946-07	No	1189	LUAD	2.18631
TCGA-64-1679-01A-21R-2066-07	No	2488	LUAD	3.63004
TCGA-64-1680-01A-02R-0946-07	No	1126	LUAD	2.45146
TCGA-64-1681-01A-11R-2066-07		1167	LUAD	3.4086
TCGA-64-5774-01A-01R-1628-07	No	2676	LUAD	2.24671
TCGA-64-5775-01A-01R-1628-07	Yes	62	LUAD	2.12088
TCGA-64-5778-01A-01R-1628-07	No	1305	LUAD	3.49557
TCGA-64-5779-01A-01R-1628-07	No	864	LUAD	1.726
TCGA-64-5781-01A-01R-1628-07	No	1559	LUAD	3.28352
TCGA-64-5815-01A-01R-1628-07	No	866	LUAD	2.75369
TCGA-66-2727-01A-01R-0980-07		516	LUSC	2.85627
TCGA-66-2734-01A-01R-0980-07	No	1311	LUSC	2.94948
TCGA-66-2737-01A-01R-0980-07	No	61	LUSC	2.64697
TCGA-66-2742-01A-01R-0980-07	No	641	LUSC	4.14845
TCGA-66-2744-01A-01R-0980-07	No	30	LUSC	2.14215
TCGA-66-2753-01A-01R-0980-07	No	31	LUSC	2.70226
TCGA-66-2754-01A-01R-0980-07	No	61	LUSC	0.903887
TCGA-66-2755-01A-01R-0851-07	No	28	LUSC	3.02576
TCGA-66-2756-01A-01R-0851-07	No	30	LUSC	3.19084
TCGA-66-2757-01A-01R-0851-07	Yes	1338	LUSC	5.74315
TCGA-66-2758-01A-02R-0851-07	No	639	LUSC	3.19829
TCGA-66-2759-01A-01R-0851-07	No	762	LUSC	3.27705
TCGA-66-2763-01A-01R-0851-07	No	30	LUSC	2.96752
TCGA-66-2765-01A-01R-0851-07	No	61	LUSC	2.05676
TCGA-66-2766-01A-01R-0851-07	No	31	LUSC	3.41404
TCGA-66-2767-01A-01R-0851-07	No	61	LUSC	2.47129
TCGA-66-2768-01A-01R-0851-07	No	61	LUSC	3.48143
TCGA-66-2769-01A-02R-0851-07		215	LUSC	3.09594
TCGA-66-2770-01A-01R-0851-07	No	700	LUSC	2.81009
TCGA-66-2771-01A-01R-0980-07	No	578	LUSC	1.98634
TCGA-66-2773-01A-01R-1201-07	No	92	LUSC	2.28795
TCGA-66-2777-01A-01R-1201-07	No	61	LUSC	3.39898
TCGA-66-2778-01A-02R-0851-07	No	578	LUSC	4.07904
TCGA-66-2780-01A-01R-0851-07		366	LUSC	3.62292
TCGA-66-2781-01A-01R-0851-07	No	121	LUSC	2.95381
TCGA-66-2782-01A-01R-0851-07	Yes	365	LUSC	2.78375
TCGA-66-2783-01A-01R-1201-07	No	759	LUSC	3.6464
TCGA-66-2785-01A-01R-0851-07	No	60	LUSC	3.77304
TCGA-66-2786-01A-01R-0851-07	No	790	LUSC	2.88555
TCGA-66-2787-01A-01R-0980-07	No	1217	LUSC	3.14945
TCGA-66-2788-01A-01R-0980-07	No	699	LUSC	3.31259
TCGA-66-2789-01A-01R-0980-07	No	123	LUSC	3.73901
TCGA-66-2790-01A-01R-0980-07	No	699	LUSC	3.98534
TCGA-66-2791-01A-01R-0980-07		153	LUSC	2.94146
TCGA-66-2792-01A-01R-0980-07	No	913	LUSC	3.71144
TCGA-66-2793-01A-01R-1201-07	No	306	LUSC	3.13675
TCGA-66-2794-01A-01R-1201-07	No	1645	LUSC	2.81338
TCGA-66-2795-01A-02R-0980-07	No	122	LUSC	3.87314
TCGA-66-2800-01A-01R-1201-07	No	1492	LUSC	4.69899
TCGA-67-3770-01A-01R-0946-07	No	610	LUAD	2.88161
TCGA-67-3771-01A-01R-0946-07	No	610	LUAD	4.53159
TCGA-67-3772-01A-01R-0946-07	No	573	LUAD	2.56803
TCGA-67-3773-01A-01R-0946-07	No	427	LUAD	1.4019
TCGA-67-3774-01A-01R-0946-07	No	385	LUAD	2.41275
TCGA-67-4679-01B-01R-1755-07	No	448	LUAD	1.4754
TCGA-67-6215-01A-11R-1755-07	No	174	LUAD	2.93166
TCGA-67-6216-01A-11R-1755-07	No	141	LUAD	1.98087
TCGA-67-6217-01A-11R-1755-07	No	422	LUAD	2.96538
TCGA-68-7755-01A-11R-2125-07	No	83	LUSC	3.71116
TCGA-68-7756-01A-11R-2125-07	No	202	LUSC	3.02016
TCGA-68-7757-01B-11R-2296-07	No	211	LUSC	3.62476
TCGA-68-8250-01A-11R-2296-07	No	244	LUSC	2.87265
TCGA-68-8251-01A-11R-2296-07	No	406	LUSC	1.57754
TCGA-68-A59I-01A-11R-A262-07	No	492	LUSC	2.81379
TCGA-68-A59J-01A-21R-A26W-07	No	448	LUSC	4.23483
TCGA-69-7760-01A-11R-2170-07	No	202	LUAD	2.39028
TCGA-69-7761-01A-11R-2170-07	No	186	LUAD	1.51733
TCGA-69-7763-01A-11R-2170-07	No	690	LUAD	2.92896
TCGA-69-7764-01A-11R-2170-07	No	414	LUAD	2.66984
TCGA-69-7765-01A-11R-2170-07	No	165	LUAD	3.11263
TCGA-69-7973-01A-11R-2187-07	No	230	LUAD	2.05102
TCGA-69-7974-01A-11R-2187-07	No	184	LUAD	2.80853
TCGA-69-7978-01A-11R-2187-07	No	134	LUAD	2.24592
TCGA-69-7979-01A-11R-2187-07	No	408	LUAD	4.22367
TCGA-69-7980-01A-11R-2187-07	No	411	LUAD	2.21493
TCGA-69-8253-01A-11R-2287-07	No	426	LUAD	3.21182
TCGA-69-8254-01A-11R-2287-07	No	409	LUAD	0.757621
TCGA-69-8255-01A-11R-2287-07	No	129	LUAD	3.08423
TCGA-69-8453-01A-12R-2326-07	No	813	LUAD	1.82965
TCGA-69-A59K-01A-11R-A262-07	No	591	LUAD	2.87259
TCGA-6A-AB49-01A-12R-A405-07	No		LUSC	3.97785
TCGA-6D-AA2E-01A-11R-A37O-07	No	362	KIRC	1.03991
TCGA-70-6722-01A-11R-1820-07	No	367	LUSC	1.58222
TCGA-70-6723-01A-11R-1820-07	No	375	LUSC	4.19983
TCGA-71-6725-01A-11R-1858-07	No	256	LUAD	3.32024
TCGA-71-8520-01A-11R-2403-07	Yes	210	LUAD	3.22041
TCGA-73-4658-01A-01R-1755-07	No	1600	LUAD	3.91195
TCGA-73-4659-01A-01R-1206-07	Yes	711	LUAD	1.5675
TCGA-73-4662-01A-01R-1206-07	No	2515	LUAD	2.89819
TCGA-73-4666-01A-01R-1206-07	No	800	LUAD	2.74065
TCGA-73-4668-01A-01R-1206-07	No	467	LUAD	3.1725
TCGA-73-4670-01A-01R-1206-07	No	131	LUAD	4.04453
TCGA-73-4675-01A-01R-1206-07	No	922	LUAD	3.54763
TCGA-73-4676-01A-01R-1755-07	Yes	281	LUAD	3.82445
TCGA-73-4677-01A-01R-1206-07	Yes	38	LUAD	2.52361
TCGA-73-7498-01A-12R-2187-07	No	1189	LUAD	3.80009
TCGA-73-7499-01A-11R-2187-07	No	1531	LUAD	3.33775
TCGA-73-A9RS-01A-11R-A41B-07	Yes	340	LUAD	2.69633
TCGA-75-5122-01A-01R-1755-07	Yes		LUAD	1.21481
TCGA-75-5125-01A-01R-1755-07	Yes	2027	LUAD	2.56686
TCGA-75-5126-01A-01R-1755-07	No		LUAD	1.70337
TCGA-75-5146-01A-01R-1628-07	No	2368	LUAD	2.14323
TCGA-75-5147-01A-01R-1628-07	No	1333	LUAD	2.25051
TCGA-75-6203-01A-11R-1755-07	No		LUAD	1.25278
TCGA-75-6205-01A-11R-1755-07	Yes		LUAD	1.68975
TCGA-75-6206-01A-11R-1755-07	No	2590	LUAD	2.28951
TCGA-75-6207-01A-11R-1755-07			LUAD	4.08338
TCGA-75-6211-01A-11R-1755-07	Yes		LUAD	3.23396
TCGA-75-6212-01A-11R-1755-07	Yes	1516	LUAD	2.73348
TCGA-75-6214-01A-41R-1949-07	Yes	1115	LUAD	4.18591
TCGA-75-7025-01A-12R-1949-07	No	3305	LUAD	2.16816
TCGA-75-7027-01A-11R-1949-07	No	3059	LUAD	3.70938
TCGA-75-7030-01A-11R-1949-07	No		LUAD	2.68477
TCGA-75-7031-01A-11R-1949-07	No		LUAD	1.53032
TCGA-76-4925-01A-01R-1850-01		146	GBM	2.82132
TCGA-76-4926-01B-01R-1850-01	Yes	138	GBM	3.57073
TCGA-76-4927-01A-01R-1850-01	Yes	535	GBM	2.34127
TCGA-76-4928-01B-01R-1850-01	Yes	94	GBM	2.54181
TCGA-76-4929-01A-01R-1850-01	Yes	111	GBM	4.29794
TCGA-76-4931-01A-01R-1850-01	Yes	279	GBM	3.24613
TCGA-76-4932-01A-01R-1850-01	Yes	1458	GBM	4.07634
TCGA-77-6842-01A-11R-1949-07		899	LUSC	1.61716
TCGA-77-6843-01A-11R-1949-07		2224	LUSC	3.64276
TCGA-77-6844-01A-11R-1949-07		2284	LUSC	2.74541
TCGA-77-6845-01A-11R-1949-07		708	LUSC	5.4191
TCGA-77-7138-01A-41R-2045-07		340	LUSC	3.53139
TCGA-77-7139-01A-11R-2045-07	No	4261	LUSC	3.84654
TCGA-77-7140-01A-41R-2045-07		632	LUSC	4.58392
TCGA-77-7141-01A-11R-2045-07	No	15	LUSC	4.54834
TCGA-77-7142-01A-11R-2045-07	No	2227	LUSC	2.61157
TCGA-77-7335-01A-11R-2045-07		2133	LUSC	3.09489
TCGA-77-7337-01A-21R-2045-07		3253	LUSC	3.54535
TCGA-77-7338-01A-11R-2045-07		5	LUSC	4.67368
TCGA-77-7463-01A-11R-2045-07		1423	LUSC	4.35012
TCGA-77-7465-01A-11R-2045-07	No	990	LUSC	2.765
TCGA-77-8007-01A-11R-2187-07		198	LUSC	3.89374
TCGA-77-8008-01A-21R-2187-07		2639	LUSC	3.80453
TCGA-77-8009-01A-11R-2187-07		1695	LUSC	3.95315
TCGA-77-8128-01A-11R-2247-07		1150	LUSC	5.17338
TCGA-77-8130-01A-11R-2247-07	No	4765	LUSC	4.79896
TCGA-77-8131-01A-11R-2247-07		383	LUSC	3.61298
TCGA-77-8133-01A-12R-2247-07		1640	LUSC	3.53032
TCGA-77-8136-01A-11R-2247-07		1189	LUSC	2.90626
TCGA-77-8138-01A-11R-2247-07	Yes	539	LUSC	2.71035
TCGA-77-8139-01A-11R-2247-07	No	3166	LUSC	3.34547
TCGA-77-8140-01A-11R-2247-07		351	LUSC	2.80834
TCGA-77-8143-01A-11R-2247-07	Yes	803	LUSC	3.78872
TCGA-77-8144-01A-11R-2247-07	No	833	LUSC	3.47844
TCGA-77-8145-01A-11R-2247-07		212	LUSC	4.9331
TCGA-77-8146-01A-11R-2247-07	No	3189	LUSC	2.92909
TCGA-77-8148-01A-11R-2247-07	No	2023	LUSC	4.19531
TCGA-77-8150-01A-11R-2247-07	Yes	1655	LUSC	2.56864
TCGA-77-8153-01A-11R-2403-07	No	1992	LUSC	4.49747
TCGA-77-8154-01A-11R-2247-07	No	1841	LUSC	4.40233
TCGA-77-8156-01A-11R-2247-07	No	1106	LUSC	3.79526
TCGA-77-A5FZ-01A-31R-A27Q-07		3838	LUSC	1.00216
TCGA-77-A5G1-01A-11R-A27Q-07	No	4026	LUSC	3.2293
TCGA-77-A5G3-01A-31R-A27Q-07	No	4570	LUSC	3.66291
TCGA-77-A5G6-01A-11R-A27Q-07	Yes	678	LUSC	4.52576
TCGA-77-A5G7-01B-11R-A27Q-07		180	LUSC	3.06681
TCGA-77-A5G8-01B-11R-A27Q-07	No	1884	LUSC	4.2462
TCGA-77-A5GA-01A-11R-A27Q-07	No	1280	LUSC	3.49695
TCGA-77-A5GB-01B-11R-A27Q-07		937	LUSC	4.86535
TCGA-77-A5GF-01A-21R-A27Q-07	Yes	840	LUSC	3.37223
TCGA-77-A5GH-01A-11R-A27Q-07	No	1182	LUSC	1.96761
TCGA-78-7143-01A-11R-2039-07		4961	LUAD	2.74795
TCGA-78-7145-01A-11R-2039-07	Yes	826	LUAD	2.98956
TCGA-78-7146-01A-11R-2039-07		173	LUAD	3.40768
TCGA-78-7147-01A-11R-2039-07	Yes	586	LUAD	3.18984
TCGA-78-7148-01A-11R-2039-07		626	LUAD	2.85565
TCGA-78-7149-01A-11R-2039-07	No	3940	LUAD	3.84617
TCGA-78-7150-01A-21R-2039-07	Yes	666	LUAD	5.58296
TCGA-78-7152-01A-11R-2039-07	Yes	1215	LUAD	2.73338
TCGA-78-7153-01A-11R-2039-07	No	3635	LUAD	1.59378
TCGA-78-7154-01A-11R-2039-07		593	LUAD	1.97185
TCGA-78-7155-01A-11R-2039-07		1171	LUAD	3.97045
TCGA-78-7156-01A-11R-2039-07		976	LUAD	1.72474
TCGA-78-7158-01A-11R-2039-07	Yes	179	LUAD	2.47257
TCGA-78-7159-01A-11R-2039-07	No	1974	LUAD	2.09545
TCGA-78-7160-01A-11R-2039-07		697	LUAD	2.90762
TCGA-78-7161-01A-11R-2039-07	Yes	291	LUAD	2.22379
TCGA-78-7162-01A-21R-2066-07		3169	LUAD	1.82916
TCGA-78-7163-01A-12R-2066-07	No	7248	LUAD	3.31729
TCGA-78-7166-01A-12R-2066-07		258	LUAD	4.79129
TCGA-78-7167-01A-11R-2066-07	Yes	2681	LUAD	2.87364
TCGA-78-7220-01A-11R-2039-07	Yes	807	LUAD	1.94931
TCGA-78-7535-01A-11R-2066-07	Yes	949	LUAD	5.83247
TCGA-78-7536-01A-11R-2066-07	Yes	244	LUAD	2.61391
TCGA-78-7537-01A-11R-2066-07		1622	LUAD	2.23469
TCGA-78-7539-01A-11R-2066-07	No	791	LUAD	3.22746
TCGA-78-7540-01A-11R-2066-07		1197	LUAD	2.80197
TCGA-78-7542-01A-21R-2066-07		321	LUAD	2.54352
TCGA-78-7633-01A-11R-2066-07	Yes	1528	LUAD	1.70186
TCGA-78-8640-01A-11R-2403-07	No	7062	LUAD	4.22892
TCGA-78-8648-01A-11R-2403-07		1209	LUAD	0.950095
TCGA-78-8655-01A-11R-2403-07	No	2360	LUAD	2.19106
TCGA-78-8660-01A-11R-2403-07	Yes	321	LUAD	2.62099
TCGA-78-8662-01A-11R-2403-07		3361	LUAD	4.25501
TCGA-79-5596-01A-31R-1949-07	No		LUSC	4.91954
TCGA-80-5607-01A-31R-1949-07	No		LUAD	1.84306
TCGA-80-5608-01A-31R-1949-07	No	2832	LUAD	2.16089
TCGA-80-5611-01A-01R-1628-07	No	2595	LUAD	4.28453
TCGA-83-5908-01A-21R-2287-07	No	824	LUAD	2.42546
TCGA-85-6175-01A-11R-1820-07	Yes	294	LUSC	3.07027
TCGA-85-6560-01A-11R-1820-07	No	1259	LUSC	3.46089
TCGA-85-6561-01A-11R-1820-07	No	1224	LUSC	3.36481
TCGA-85-6798-01A-11R-1949-07	Yes	195	LUSC	5.54557
TCGA-85-7696-01A-11R-2125-07	No	1111	LUSC	4.55897
TCGA-85-7697-01A-11R-2125-07	No	1063	LUSC	4.88102
TCGA-85-7698-01A-11R-2125-07	No	952	LUSC	4.16956
TCGA-85-7699-01A-11R-2125-07	Yes	1001	LUSC	2.80463
TCGA-85-7710-01A-11R-2125-07	No	42	LUSC	4.03576
TCGA-85-7843-01A-11R-2125-07	No	35	LUSC	3.13491
TCGA-85-7844-01A-11R-2125-07	No	911	LUSC	3.12174
TCGA-85-7950-01A-11R-2187-07	No	576	LUSC	2.11483
TCGA-85-8048-01A-11R-2247-07	No	765	LUSC	2.16726
TCGA-85-8049-01A-11R-2247-07	No	579	LUSC	3.3759
TCGA-85-8052-01A-11R-2247-07	No	734	LUSC	4.14351
TCGA-85-8070-01A-11R-2247-07	No	960	LUSC	4.70889
TCGA-85-8071-01A-11R-2247-07	No	815	LUSC	4.01973
TCGA-85-8072-01A-31R-2247-07	No	932	LUSC	4.17471
TCGA-85-8276-01A-11R-2296-07	No	1050	LUSC	3.05443
TCGA-85-8277-01A-11R-2296-07	No	307	LUSC	3.42113
TCGA-85-8287-01A-11R-2296-07	No	23	LUSC	3.6385
TCGA-85-8288-01A-11R-2296-07	No	402	LUSC	3.51367
TCGA-85-8350-01A-11R-2296-07	No	683	LUSC	3.94506
TCGA-85-8351-01A-11R-2296-07	No	510	LUSC	3.66154
TCGA-85-8352-01A-31R-2326-07	Yes	161	LUSC	4.64155
TCGA-85-8353-01A-21R-2296-07	Yes	94	LUSC	3.22423
TCGA-85-8354-01A-31R-2326-07	No	995	LUSC	3.74375
TCGA-85-8355-01A-11R-2296-07	No	61	LUSC	2.38775
TCGA-85-8479-01A-11R-2326-07	No	468	LUSC	6.0778
TCGA-85-8481-01A-11R-2326-07	No	236	LUSC	3.23654
TCGA-85-8580-01A-31R-2403-07	No	1113	LUSC	5.02583
TCGA-85-8582-01A-21R-2403-07	No	1160	LUSC	3.16337
TCGA-85-8584-01A-11R-2403-07	No	383	LUSC	1.92048
TCGA-85-8664-01A-11R-2403-07	Yes	550	LUSC	4.29427
TCGA-85-8666-01A-11R-2403-07	No	687	LUSC	4.33003
TCGA-85-A4CL-01A-41R-A26W-07	No	921	LUSC	4.46081
TCGA-85-A4CN-01A-11R-A24H-07	No	1038	LUSC	4.33282
TCGA-85-A4JB-01A-51R-A262-07	No	942	LUSC	4.7341
TCGA-85-A4JC-01A-11R-A24Z-07	Yes	604	LUSC	4.52218
TCGA-85-A4PA-01A-11R-A24Z-07	No	741	LUSC	1.45454
TCGA-85-A4QQ-01A-41R-A262-07	No	927	LUSC	6.39134
TCGA-85-A4QR-01A-11R-A24Z-07	No	600	LUSC	3.66165
TCGA-85-A50M-01A-21R-A262-07	No	826	LUSC	3.07229
TCGA-85-A50Z-01A-21R-A262-07	No	493	LUSC	2.93812
TCGA-85-A510-01A-11R-A26W-07	No	482	LUSC	2.17919
TCGA-85-A511-01A-21R-A262-07	Yes	455	LUSC	3.60832
TCGA-85-A512-01A-11R-A26W-07	No	465	LUSC	5.11074
TCGA-85-A513-01A-12R-A26W-07	No	910	LUSC	1.94156
TCGA-85-A53L-01A-21R-A26W-07	No	377	LUSC	4.12377
TCGA-85-A5B5-01A-21R-A26W-07	No	111	LUSC	4.68169
TCGA-86-6562-01A-11R-1755-07	Yes	376	LUAD	3.79001
TCGA-86-6851-01A-11R-1949-07	No	179	LUAD	1.87476
TCGA-86-7701-01A-11R-2170-07	No	947	LUAD	1.79019
TCGA-86-7711-01A-11R-2066-07	Yes	1046	LUAD	2.76243
TCGA-86-7713-01A-11R-2066-07	No	1157	LUAD	2.00263
TCGA-86-7714-01A-12R-2170-07	Yes	625	LUAD	2.09734
TCGA-86-7953-01A-11R-2187-07	No	997	LUAD	3.36881
TCGA-86-7954-01A-11R-2187-07	No	605	LUAD	2.39314
TCGA-86-7955-01A-11R-2187-07	No	1072	LUAD	4.97873
TCGA-86-8054-01A-11R-2241-07	No	1148	LUAD	1.90681
TCGA-86-8055-01A-11R-2241-07	No	124	LUAD	3.33929
TCGA-86-8056-01A-11R-2241-07	No	139	LUAD	2.10202
TCGA-86-8073-01A-11R-2241-07	No	740	LUAD	2.61779
TCGA-86-8074-01A-11R-2241-07	No	24	LUAD	3.62814
TCGA-86-8075-01A-11R-2241-07	No	694	LUAD	3.15452
TCGA-86-8076-01A-31R-2241-07	No	993	LUAD	2.79579
TCGA-86-8278-01A-11R-2287-07	No	944	LUAD	1.84976
TCGA-86-8279-01A-11R-2287-07	No	949	LUAD	4.6012
TCGA-86-8280-01A-11R-2287-07	No	701	LUAD	3.65887
TCGA-86-8281-01A-11R-2287-07	No	0	LUAD	3.37092
TCGA-86-8358-01A-11R-2326-07	No	653	LUAD	3.18927
TCGA-86-8359-01A-11R-2326-07	No	444	LUAD	2.97657
TCGA-86-8585-01A-11R-2403-07	No	353	LUAD	4.43006
TCGA-86-8668-01A-11R-2403-07	No	423	LUAD	2.58434
TCGA-86-8669-01A-11R-2403-07	No	938	LUAD	1.73075
TCGA-86-8671-01A-11R-2403-07	No	839	LUAD	1.79298
TCGA-86-8672-01A-21R-2403-07	No	19	LUAD	2.55326
TCGA-86-8673-01A-11R-2403-07	No	862	LUAD	4.63747
TCGA-86-8674-01A-21R-2403-07	No	806	LUAD	3.65716
TCGA-86-A456-01A-11R-A24H-07	No	896	LUAD	2.46462
TCGA-86-A4D0-01A-11R-A24H-07	No	116	LUAD	2.36008
TCGA-86-A4JF-01A-11R-A24X-07	Yes	737	LUAD	3.17771
TCGA-86-A4P7-01A-11R-A24X-07	No	415	LUAD	3.1731
TCGA-86-A4P8-01A-11R-A24X-07	No	805	LUAD	1.15543
TCGA-90-6837-01A-11R-1949-07	No	758	LUSC	4.02712
TCGA-90-7766-01A-21R-2125-07	No	289	LUSC	1.67297
TCGA-90-7767-01A-11R-2125-07	No	89	LUSC	3.28283
TCGA-90-7769-01A-11R-2125-07	No	358	LUSC	4.08326
TCGA-90-7964-01A-21R-2187-07	No	428	LUSC	3.45864
TCGA-90-A4ED-01A-31R-A24Z-07	No	615	LUSC	6.21627
TCGA-90-A4EE-01A-11R-A24Z-07	No	688	LUSC	2.58907
TCGA-90-A59Q-01A-11R-A26W-07	Yes	322	LUSC	4.31887
TCGA-91-6828-01A-11R-1858-07	No	323	LUAD	1.14666
TCGA-91-6829-01A-21R-1858-07	No	1258	LUAD	2.79029
TCGA-91-6830-01A-11R-1949-07	No	60	LUAD	2.84808
TCGA-91-6831-01A-11R-1858-07	No	310	LUAD	2.40286
TCGA-91-6835-01A-11R-1858-07	No	79	LUAD	2.91852
TCGA-91-6836-01A-21R-1858-07	No	417	LUAD	4.91985
TCGA-91-6840-01A-11R-1949-07	No	372	LUAD	2.02176
TCGA-91-6847-01A-11R-1949-07	No	842	LUAD	2.63155
TCGA-91-6848-01A-11R-1949-07	No	224	LUAD	1.82965
TCGA-91-6849-01A-11R-1949-07	No	35	LUAD	2.50957
TCGA-91-7771-01A-11R-2170-07	No	492	LUAD	1.88772
TCGA-91-8496-01A-11R-2403-07	No	505	LUAD	2.43683
TCGA-91-8497-01A-11R-2403-07	No	434	LUAD	2.42554
TCGA-91-8499-01A-11R-2403-07	No	36	LUAD	4.39881
TCGA-91-A4BC-01A-11R-A24H-07	No	44	LUAD	2.14176
TCGA-91-A4BD-01A-11R-A24H-07	No	603	LUAD	1.67523
TCGA-92-7340-01A-21R-2045-07	No	82	LUSC	3.10973
TCGA-92-7341-01A-31R-2045-07	No	106	LUSC	4.09728
TCGA-92-8063-01A-11R-2247-07	No	122	LUSC	4.33676
TCGA-92-8064-01A-11R-2247-07	No	160	LUSC	2.78835
TCGA-92-8065-01A-11R-2247-07	No	70	LUSC	4.71903
TCGA-93-7347-01A-11R-2187-07	No	683	LUAD	1.80707
TCGA-93-7348-01A-21R-2039-07	No	531	LUAD	3.16042
TCGA-93-8067-01A-11R-2287-07	No	186	LUAD	2.24568
TCGA-93-A4JN-01A-11R-A24X-07	No	718	LUAD	1.77699
TCGA-93-A4JO-01A-21R-A24X-07	No	33	LUAD	2.41438
TCGA-93-A4JP-01A-11R-A24X-07	No	578	LUAD	2.69084
TCGA-93-A4JQ-01A-11R-A24X-07	No	526	LUAD	1.76727
TCGA-94-7033-01A-11R-1949-07	No	640	LUSC	3.70546
TCGA-94-7557-01A-11R-2125-07	No	5	LUSC	3.46129
TCGA-94-7943-01A-11R-2187-07	No	559	LUSC	2.24144
TCGA-94-8035-01A-11R-2247-07	No	122	LUSC	4.97845
TCGA-94-8490-01A-11R-2326-07	No	153	LUSC	5.21271
TCGA-94-8491-01A-11R-2326-07	No	810	LUSC	3.22985
TCGA-94-A4VJ-01A-11R-A24Z-07	No	430	LUSC	4.28866
TCGA-94-A5I4-01A-11R-A26W-07	No	491	LUSC	3.81121
TCGA-94-A5I6-01A-21R-A27Q-07	No	538	LUSC	4.30133
TCGA-95-7039-01A-11R-1949-07	No	1272	LUAD	2.9324
TCGA-95-7043-01A-11R-1949-07	Yes	503	LUAD	2.30141
TCGA-95-7562-01A-11R-2241-07	No	87	LUAD	4.01787
TCGA-95-7567-01A-11R-2066-07	No	568	LUAD	3.12287
TCGA-95-7944-01A-11R-2187-07	No	377	LUAD	3.05122
TCGA-95-7947-01A-11R-2187-07	No	477	LUAD	2.72731
TCGA-95-7948-01A-11R-2187-07	No	476	LUAD	2.58722
TCGA-95-8039-01A-11R-2241-07	No	830	LUAD	1.6469
TCGA-95-8494-01A-11R-2326-07	No	84	LUAD	2.95583
TCGA-95-A4VK-01A-11R-A262-07	No	651	LUAD	3.50022
TCGA-95-A4VN-01A-11R-A262-07	No	553	LUAD	2.30973
TCGA-95-A4VP-01A-21R-A262-07	No	605	LUAD	2.2725
TCGA-96-7544-01A-11R-2045-07	No	2160	LUSC	2.29045
TCGA-96-7545-01A-21R-2045-07		1736	LUSC	3.62672
TCGA-96-8169-01A-11R-2296-07	No	557	LUSC	2.75858
TCGA-96-8170-01A-11R-2296-07	No	531	LUSC	3.55556
TCGA-96-A4JK-01A-11R-A24Z-07	No	589	LUSC	3.79899
TCGA-96-A4JL-01A-11R-A24Z-07	No	842	LUSC	2.67385
TCGA-97-7546-01A-11R-2039-07	No	1285	LUAD	2.11313
TCGA-97-7547-01A-11R-2039-07	No	1965	LUAD	1.96536
TCGA-97-7552-01A-11R-2039-07	No	1932	LUAD	1.08984
TCGA-97-7553-01A-21R-2039-07	No	1870	LUAD	1.62368
TCGA-97-7554-01A-11R-2039-07	No	775	LUAD	2.65037
TCGA-97-7937-01A-11R-2170-07	No	564	LUAD	3.95076
TCGA-97-7938-01A-11R-2170-07	No	18	LUAD	1.04117
TCGA-97-7941-01A-11R-2187-07	No	484	LUAD	3.00592
TCGA-97-8171-01A-11R-2287-07	No	568	LUAD	5.41242
TCGA-97-8172-01A-11R-2287-07	No	545	LUAD	1.82448
TCGA-97-8174-01A-11R-2287-07		164	LUAD	1.71581
TCGA-97-8175-01A-11R-2287-07	No	551	LUAD	3.39233
TCGA-97-8176-01A-11R-2403-07	No	468	LUAD	2.18168
TCGA-97-8177-01A-11R-2287-07	No	499	LUAD	3.11992
TCGA-97-8179-01A-11R-2287-07	No	435	LUAD	3.34704
TCGA-97-8547-01A-11R-2403-07	No	657	LUAD	2.48101
TCGA-97-8552-01A-11R-2403-07	No	626	LUAD	1.71211
TCGA-97-A4LX-01A-11R-A24X-07	No	614	LUAD	2.02974
TCGA-97-A4M0-01A-11R-A24X-07	No	652	LUAD	2.10618
TCGA-97-A4M1-01A-11R-A24X-07	No	601	LUAD	2.80554
TCGA-97-A4M2-01A-12R-A24X-07	No	624	LUAD	1.96392
TCGA-97-A4M3-01A-11R-A24X-07	No	540	LUAD	2.64476
TCGA-97-A4M5-01A-11R-A24X-07	No	634	LUAD	2.36608
TCGA-97-A4M6-01A-11R-A24X-07	No	568	LUAD	2.97973
TCGA-97-A4M7-01A-11R-A24X-07	No	629	LUAD	1.74627
TCGA-98-7454-01A-11R-2045-07	No	652	LUSC	2.93533
TCGA-98-8020-01A-11R-2247-07	Yes	84	LUSC	3.7411
TCGA-98-8021-01A-11R-2247-07	No	937	LUSC	4.04681
TCGA-98-8022-01A-11R-2247-07	No	933	LUSC	3.26143
TCGA-98-8023-01A-11R-2247-07	No	649	LUSC	2.26252
TCGA-98-A538-01A-11R-A262-07	No	826	LUSC	4.30357
TCGA-98-A539-01A-31R-A262-07	No	173	LUSC	3.24472
TCGA-98-A53A-01A-11R-A262-07		552	LUSC	4.00604
TCGA-98-A53B-01A-11R-A262-07	No	61	LUSC	3.01767
TCGA-98-A53C-01A-11R-A262-07	No	822	LUSC	1.35298
TCGA-98-A53D-01A-32R-A262-07	Yes	645	LUSC	0.811635
TCGA-98-A53H-01A-12R-A262-07	No	618	LUSC	2.04914
TCGA-98-A53I-01A-31R-A262-07	No	565	LUSC	2.76009
TCGA-98-A53J-01A-11R-A26W-07	No	630	LUSC	4.05708
TCGA-99-7458-01A-11R-2039-07	No	747	LUAD	2.55694
TCGA-99-8025-01A-11R-2241-07	No	1060	LUAD	4.16462
TCGA-99-8028-01A-11R-2241-07	No	1118	LUAD	1.99993
TCGA-99-8032-01A-11R-2241-07	No	44	LUAD	1.50274
TCGA-99-8033-01A-11R-2241-07	Yes	656	LUAD	4.38209
TCGA-99-AA5R-01A-11R-A39D-07	No	658	LUAD	1.67224
TCGA-A1-A0SB-01A-11R-A144-07	No	259	BRCA	4.9265
TCGA-A1-A0SD-01A-11R-A115-07	No	437	BRCA	3.85033
TCGA-A1-A0SE-01A-11R-A084-07	No	1321	BRCA	3.44545
TCGA-A1-A0SF-01A-11R-A144-07	No	1463	BRCA	4.50463
TCGA-A1-A0SG-01A-11R-A144-07	No	434	BRCA	5.04005
TCGA-A1-A0SH-01A-11R-A084-07	No	1437	BRCA	2.79367
TCGA-A1-A0SI-01A-11R-A144-07	No	635	BRCA	6.54765
TCGA-A1-A0SJ-01A-11R-A084-07	No	416	BRCA	2.50404
TCGA-A1-A0SK-01A-12R-A084-07	Yes	967	BRCA	5.54248
TCGA-A1-A0SN-01A-11R-A144-07	No	1196	BRCA	2.96933
TCGA-A1-A0SO-01A-22R-A084-07	No	852	BRCA	2.31417
TCGA-A1-A0SP-01A-11R-A084-07	No	584	BRCA	3.56976
TCGA-A1-A0SQ-01A-21R-A144-07	No	554	BRCA	2.95062
TCGA-A2-A04N-01A-11R-A115-07	No	4354	BRCA	4.7373
TCGA-A2-A04P-01A-31R-A034-07	Yes	548	BRCA	6.20101
TCGA-A2-A04Q-01A-21R-A034-07	No	2385	BRCA	4.08027
TCGA-A2-A04R-01A-41R-A109-07	No	3709	BRCA	3.28565
TCGA-A2-A04T-01A-21R-A034-07	No	2246	BRCA	5.51774
TCGA-A2-A04U-01A-11R-A115-07	No	2654	BRCA	5.29616
TCGA-A2-A04V-01A-21R-A034-07	Yes	1920	BRCA	2.06557
TCGA-A2-A04W-01A-31R-A115-07	No	3102	BRCA	4.83253
TCGA-A2-A04X-01A-21R-A034-07	No	1686	BRCA	4.46271
TCGA-A2-A04Y-01A-21R-A034-07	No	1099	BRCA	4.74782
TCGA-A2-A0CK-01A-11R-A22K-07	No	4159	BRCA	3.0943
TCGA-A2-A0CL-01A-11R-A115-07	No	3015	BRCA	3.24077
TCGA-A2-A0CM-01A-31R-A034-07	Yes	754	BRCA	4.89825
TCGA-A2-A0CO-01A-13R-A22K-07	No	3492	BRCA	2.93834
TCGA-A2-A0CP-01A-11R-A034-07	No	2813	BRCA	4.77816
TCGA-A2-A0CQ-01A-21R-A034-07	No	2695	BRCA	4.4782
TCGA-A2-A0CR-01A-11R-A22K-07	No	3283	BRCA	2.84238
TCGA-A2-A0CS-01A-11R-A115-07	No	2348	BRCA	6.10883
TCGA-A2-A0CT-01A-31R-A056-07	No	2289	BRCA	2.43534
TCGA-A2-A0CU-01A-12R-A034-07	No	158	BRCA	2.41286
TCGA-A2-A0CV-01A-31R-A115-07	No	3011	BRCA	3.41977
TCGA-A2-A0CW-01A-21R-A115-07	No	3283	BRCA	6.1976
TCGA-A2-A0CX-01A-21R-A00Z-07	No	1728	BRCA	6.83407
TCGA-A2-A0CY-01A-12R-A034-07	No	1673	BRCA	4.05089
TCGA-A2-A0CZ-01A-11R-A034-07	No	1616	BRCA	2.25988
TCGA-A2-A0D0-01A-11R-A00Z-07	No	2048	BRCA	3.96377
TCGA-A2-A0D1-01A-11R-A034-07	No	1051	BRCA	4.66778
TCGA-A2-A0D2-01A-21R-A034-07	No	1027	BRCA	2.7773
TCGA-A2-A0D3-01A-11R-A115-07	No	1873	BRCA	6.19003
TCGA-A2-A0D4-01A-11R-A00Z-07	No	767	BRCA	3.17124
TCGA-A2-A0EM-01A-11R-A034-07	No	3094	BRCA	4.72932
TCGA-A2-A0EN-01A-13R-A084-07	No	4088	BRCA	2.22565
TCGA-A2-A0EO-01A-11R-A034-07	No	2442	BRCA	3.63308
TCGA-A2-A0EP-01A-52R-A22U-07	No	3603	BRCA	2.88854
TCGA-A2-A0EQ-01A-11R-A034-07	No	2426	BRCA	4.53783
TCGA-A2-A0ER-01A-21R-A034-07	No	2263	BRCA	1.75924
TCGA-A2-A0ES-01A-11R-A115-07	No	2190	BRCA	3.05655
TCGA-A2-A0ET-01A-31R-A034-07	No	1066	BRCA	2.40237
TCGA-A2-A0EU-01A-22R-A056-07	No	1043	BRCA	3.00621
TCGA-A2-A0EV-01A-11R-A034-07	No	968	BRCA	2.56504
TCGA-A2-A0EW-01A-21R-A115-07	Yes	1884	BRCA	3.07435
TCGA-A2-A0EX-01A-21R-A034-07	No	752	BRCA	3.33255
TCGA-A2-A0EY-01A-11R-A034-07	No	1925	BRCA	6.20041
TCGA-A2-A0ST-01A-12R-A084-07	No	3017	BRCA	2.52311
TCGA-A2-A0SU-01A-11R-A084-07	No	1662	BRCA	3.51733
TCGA-A2-A0SV-01A-11R-A084-07	Yes	825	BRCA	3.36718
TCGA-A2-A0SW-01A-11R-A084-07	Yes	1365	BRCA	5.62643
TCGA-A2-A0SX-01A-12R-A084-07	No	1534	BRCA	4.2424
TCGA-A2-A0SY-01A-31R-A084-07	No	1347	BRCA	2.39048
TCGA-A2-A0T0-01A-22R-A084-07	No	533	BRCA	5.74998
TCGA-A2-A0T1-01A-21R-A084-07	No	521	BRCA	4.06151
TCGA-A2-A0T2-01A-11R-A084-07	Yes	255	BRCA	5.17659
TCGA-A2-A0T3-01A-21R-A115-07	No	1516	BRCA	2.90722
TCGA-A2-A0T4-01A-31R-A084-07	No	624	BRCA	2.83019
TCGA-A2-A0T5-01A-21R-A084-07	No	531	BRCA	4.67085
TCGA-A2-A0T6-01A-11R-A084-07	No	575	BRCA	2.69466
TCGA-A2-A0T7-01A-21R-A084-07	No	631	BRCA	4.19208
TCGA-A2-A0YC-01A-11R-A109-07	No	990	BRCA	4.81486
TCGA-A2-A0YD-01A-11R-A109-07	No	769	BRCA	3.6658
TCGA-A2-A0YE-01A-11R-A109-07	No	554	BRCA	4.65601
TCGA-A2-A0YF-01A-21R-A109-07	No	1535	BRCA	3.6067
TCGA-A2-A0YG-01A-21R-A109-07	No	666	BRCA	6.86891
TCGA-A2-A0YH-01A-11R-A109-07	No	659	BRCA	3.76091
TCGA-A2-A0YI-01A-31R-A10J-07	No	1505	BRCA	2.40847
TCGA-A2-A0YJ-01A-11R-A109-07	No	566	BRCA	5.97412
TCGA-A2-A0YK-01A-22R-A109-07	No	588	BRCA	4.82085
TCGA-A2-A0YL-01A-21R-A109-07	No	1474	BRCA	3.58109
TCGA-A2-A0YM-01A-11R-A109-07	No	965	BRCA	2.78858
TCGA-A2-A1FV-01A-11R-A13Q-07	No	714	BRCA	0.993711
TCGA-A2-A1FW-01A-11R-A13Q-07	No	528	BRCA	3.09063
TCGA-A2-A1FX-01A-11R-A13Q-07	No	1847	BRCA	3.10313
TCGA-A2-A1FZ-01A-51R-A14D-07	No	683	BRCA	4.07787
TCGA-A2-A1G0-01A-11R-A13Q-07	No	616	BRCA	4.0055
TCGA-A2-A1G1-01A-21R-A13Q-07	No	584	BRCA	2.03643
TCGA-A2-A1G4-01A-11R-A13Q-07	No	595	BRCA	1.16202
TCGA-A2-A1G6-01A-11R-A13Q-07	No	501	BRCA	2.88848
TCGA-A2-A259-01A-11R-A16F-07	No	1596	BRCA	3.34389
TCGA-A2-A25A-01A-12R-A16F-07	No	3276	BRCA	4.28619
TCGA-A2-A25B-01A-11R-A169-07	No	1291	BRCA	2.53099
TCGA-A2-A25C-01A-11R-A169-07	No	523	BRCA	3.587
TCGA-A2-A25D-01A-12R-A16F-07	No	552	BRCA	3.56515
TCGA-A2-A25E-01A-11R-A169-07	No	3204	BRCA	3.39276
TCGA-A2-A25F-01A-11R-A169-07	No	322	BRCA	1.56769
TCGA-A2-A3KC-01A-11R-A213-07	No	1102	BRCA	3.36706
TCGA-A2-A3KD-01A-12R-A213-07	No	1206	BRCA	3.01783
TCGA-A2-A3XS-01A-11R-A22U-07	Yes	1032	BRCA	5.15687
TCGA-A2-A3XT-01A-11R-A22U-07	No	2770	BRCA	4.34297
TCGA-A2-A3XU-01A-12R-A22U-07	Yes	912	BRCA	7.16455
TCGA-A2-A3XV-01A-21R-A239-07	No	996	BRCA	6.086
TCGA-A2-A3XW-01A-11R-A239-07	No	1712	BRCA	5.88574
TCGA-A2-A3XX-01A-21R-A239-07	No	1439	BRCA	5.98706
TCGA-A2-A3XY-01A-11R-A239-07	Yes	1093	BRCA	5.1889
TCGA-A2-A3XZ-01A-42R-A239-07	No	1532	BRCA	2.77587
TCGA-A2-A3Y0-01A-11R-A239-07	No	1546	BRCA	5.18533
TCGA-A2-A4RW-01A-21R-A266-07	No	222	BRCA	3.74965
TCGA-A2-A4RX-01A-11R-A266-07	No	742	BRCA	4.5405
TCGA-A2-A4RY-01A-31R-A266-07	No	648	BRCA	3.56789
TCGA-A2-A4S0-01A-21R-A266-07	No	706	BRCA	2.66501
TCGA-A2-A4S1-01A-21R-A266-07	No	820	BRCA	2.16195
TCGA-A2-A4S2-01A-12R-A266-07	No	643	BRCA	3.33574
TCGA-A2-A4S3-01A-21R-A266-07	No	666	BRCA	4.05339
TCGA-A3-3306-01A-01R-0864-07	No	1120	KIRC	3.80352
TCGA-A3-3307-01A-01R-0864-07	No	1436	KIRC	1.77028
TCGA-A3-3308-01A-02R-1325-07	No	16	KIRC	2.14039
TCGA-A3-3311-01A-02R-1325-07	No	1191	KIRC	1.97332
TCGA-A3-3313-01A-02R-1325-07	No	735	KIRC	0.501719
TCGA-A3-3316-01A-01R-0864-07	No	1493	KIRC	3.05702
TCGA-A3-3317-01A-02R-1325-07	No	1491	KIRC	1.26766
TCGA-A3-3319-01A-02R-1325-07	No	1130	KIRC	3.09876
TCGA-A3-3320-01A-02R-1325-07	No	1508	KIRC	2.23202
TCGA-A3-3322-01A-02R-1325-07	No	1478	KIRC	2.70604
TCGA-A3-3323-01A-02R-1325-07	No	1106	KIRC	3.41522
TCGA-A3-3324-01A-02R-1325-07	No	1186	KIRC	2.58345
TCGA-A3-3325-01A-01R-0864-07	No	1170	KIRC	1.98463
TCGA-A3-3326-01A-01R-0864-07	No	1137	KIRC	2.43018
TCGA-A3-3328-01A-01R-0864-07	No	1385	KIRC	0.643579
TCGA-A3-3329-01A-01R-0864-07	No	1624	KIRC	2.16919
TCGA-A3-3331-01A-02R-1325-07	No	1485	KIRC	2.09011
TCGA-A3-3335-01A-01R-0864-07	No	1886	KIRC	3.75042
TCGA-A3-3343-01A-01R-0864-07	No	945	KIRC	3.46347
TCGA-A3-3346-01A-01R-1766-07	Yes	137	KIRC	3.73485
TCGA-A3-3347-01A-02R-1325-07	Yes	1610	KIRC	2.39797
TCGA-A3-3349-01A-01R-1188-07	No	1385	KIRC	2.67324
TCGA-A3-3351-01A-02R-1325-07	No	910	KIRC	2.52457
TCGA-A3-3352-01A-01R-0864-07	No	561	KIRC	2.34803
TCGA-A3-3357-01A-02R-1420-07	No	2688	KIRC	1.70408
TCGA-A3-3358-01A-01R-1541-07	No	1307	KIRC	1.7233
TCGA-A3-3359-01A-01R-0864-07	No	2504	KIRC	1.81172
TCGA-A3-3362-01A-02R-1325-07	No	1559	KIRC	2.34415
TCGA-A3-3363-01A-01R-0864-07	No	319	KIRC	1.47861
TCGA-A3-3365-01A-01R-0864-07	No	873	KIRC	2.1042
TCGA-A3-3367-01A-02R-1420-07	No	2270	KIRC	2.7596
TCGA-A3-3370-01A-02R-1420-07	No	2274	KIRC	2.42903
TCGA-A3-3372-01A-02R-1325-07	No	735	KIRC	2.57367
TCGA-A3-3373-01A-02R-1420-07	No	1621	KIRC	1.25574
TCGA-A3-3374-01A-02R-1325-07	No	1314	KIRC	0.282618
TCGA-A3-3376-01A-02R-1420-07	No	1696	KIRC	2.13953
TCGA-A3-3378-01A-02R-1325-07	No	630	KIRC	2.39454
TCGA-A3-3380-01A-01R-0864-07	No	567	KIRC	2.6352
TCGA-A3-3382-01A-02R-1325-07	No	574	KIRC	3.95333
TCGA-A3-3383-01A-02R-1325-07	No	861	KIRC	2.94884
[truncated: 8,345 more rows]

## Sheet: Table VI
Table SVI. Expression levels of EFNA3 and PFI survival events and time in various cancer samples.
Sample ID	PFI event	PFI time	Tumor type	EFNA3 expression levels
TCGA-02-0047-01A-01R-1849-01	Yes	57	GBM	2.32357
TCGA-02-0055-01A-01R-1849-01	Yes	6	GBM	2.11899
TCGA-02-2483-01A-01R-1849-01	No	466	GBM	4.48472
TCGA-02-2485-01A-01R-1849-01	Yes	186	GBM	2.08171
TCGA-02-2486-01A-01R-1849-01	Yes	618	GBM	2.11886
TCGA-04-1331-01A-01R-1569-13	Yes	459	OV	2.80876
TCGA-04-1332-01A-01R-1564-13	Yes	393	OV	3.18853
TCGA-04-1338-01A-01R-1564-13	Yes	380	OV	4.04624
TCGA-04-1341-01A-01R-1564-13	No	33	OV	3.05395
TCGA-04-1343-01A-01R-1564-13	Yes	361	OV	3.81636
TCGA-04-1347-01A-01R-1564-13	No	1919	OV	6.8026
TCGA-04-1350-01A-01R-1565-13	Yes	111	OV	3.21534
TCGA-04-1356-01A-01R-1569-13	Yes	156	OV	3.89767
TCGA-04-1357-01A-01R-1565-13	No		OV	1.83005
TCGA-04-1361-01A-01R-1565-13	Yes	927	OV	3.63415
TCGA-04-1362-01A-01R-1565-13	Yes	223	OV	2.99163
TCGA-04-1364-01A-01R-1565-13	Yes	288	OV	5.43775
TCGA-04-1365-01A-01R-1565-13	Yes	1328	OV	3.5003
TCGA-04-1514-01A-01R-1566-13	Yes	1221	OV	5.53629
TCGA-04-1519-01A-01R-1565-13	No	24	OV	4.0684
TCGA-04-1530-01A-02R-1569-13	Yes	350	OV	3.53249
TCGA-04-1536-01A-01R-1566-13	Yes	498	OV	4.24169
TCGA-04-1542-01A-01R-1566-13	Yes	1020	OV	5.46004
TCGA-04-1648-01A-01R-1567-13	Yes	412	OV	3.0237
TCGA-04-1651-01A-01R-1567-13	Yes	990	OV	4.57247
TCGA-04-1655-01A-01R-1566-13	Yes	819	OV	4.50576
TCGA-05-4244-01A-01R-1107-07	No	0	LUAD	4.42925
TCGA-05-4249-01A-01R-1107-07	No	1523	LUAD	2.67541
TCGA-05-4250-01A-01R-1107-07	No	121	LUAD	2.37317
TCGA-05-4382-01A-01R-1206-07	Yes	334	LUAD	3.90093
TCGA-05-4384-01A-01R-1755-07	Yes	183	LUAD	4.53079
TCGA-05-4389-01A-01R-1206-07	No	1369	LUAD	5.75931
TCGA-05-4390-01A-02R-1755-07	Yes	395	LUAD	2.23603
TCGA-05-4395-01A-01R-1206-07	No	0	LUAD	2.85689
TCGA-05-4396-01A-21R-1858-07	No	303	LUAD	3.8908
TCGA-05-4397-01A-01R-1206-07	No	731	LUAD	2.62604
TCGA-05-4398-01A-01R-1206-07	No	1431	LUAD	3.27995
TCGA-05-4402-01A-01R-1206-07	No	244	LUAD	3.50414
TCGA-05-4403-01A-01R-1206-07	No	578	LUAD	3.0701
TCGA-05-4405-01A-21R-1858-07	No	610	LUAD	2.9528
TCGA-05-4410-01A-21R-1858-07	No	0	LUAD	2.06788
TCGA-05-4415-01A-22R-1858-07	Yes	60	LUAD	4.7223
TCGA-05-4417-01A-22R-1858-07	No	455	LUAD	1.38018
TCGA-05-4418-01A-01R-1206-07	No	274	LUAD	2.82155
TCGA-05-4420-01A-01R-1206-07	No	912	LUAD	2.71343
TCGA-05-4422-01A-01R-1206-07	No	365	LUAD	3.21818
TCGA-05-4424-01A-22R-1858-07	Yes	153	LUAD	2.24747
TCGA-05-4425-01A-01R-1755-07	No	669	LUAD	2.21767
TCGA-05-4426-01A-01R-1206-07	Yes	457	LUAD	3.98733
TCGA-05-4427-01A-21R-1858-07	No	791	LUAD	2.32993
TCGA-05-4430-01A-02R-1206-07	No	761	LUAD	3.1998
TCGA-05-4432-01A-01R-1206-07	No	761	LUAD	4.59413
TCGA-05-4433-01A-22R-1858-07	No	730	LUAD	1.69001
TCGA-05-4434-01A-01R-1206-07	No	457	LUAD	3.50251
TCGA-05-5420-01A-01R-1628-07	Yes	245	LUAD	1.46587
TCGA-05-5423-01A-01R-1628-07	No	151	LUAD	2.5763
TCGA-05-5425-01A-02R-1628-07	Yes	486	LUAD	3.19153
TCGA-05-5428-01A-01R-1628-07	No	670	LUAD	4.2092
TCGA-05-5429-01A-01R-1628-07	No	275	LUAD	3.33865
TCGA-05-5715-01A-01R-1628-07	No	62	LUAD	3.3152
TCGA-06-0125-01A-01R-1849-01	Yes	797	GBM	2.20141
TCGA-06-0125-02A-11R-2005-01	Yes	797	GBM	3.1176
TCGA-06-0129-01A-01R-1849-01	Yes	148	GBM	3.20928
TCGA-06-0130-01A-01R-1849-01	Yes	244	GBM	1.30865
TCGA-06-0132-01A-02R-1849-01	Yes	482	GBM	3.1821
TCGA-06-0138-01A-02R-1849-01	Yes	394	GBM	2.57529
TCGA-06-0139-01A-01R-1849-01	Yes	152	GBM	1.77155
TCGA-06-0141-01A-01R-1849-01	Yes	145	GBM	1.6769
TCGA-06-0152-02A-01R-2005-01	Yes	299	GBM	2.49347
TCGA-06-0156-01A-02R-1849-01	Yes	178	GBM	3.0843
TCGA-06-0156-01A-03R-1849-01	Yes	178	GBM	3.28448
TCGA-06-0157-01A-01R-1849-01	Yes	97	GBM	3.18737
TCGA-06-0158-01A-01R-1849-01	Yes	90	GBM	2.56272
TCGA-06-0168-01A-01R-1849-01	Yes	461	GBM	2.82908
TCGA-06-0171-02A-11R-2005-01	Yes	117	GBM	2.014
TCGA-06-0174-01A-01R-1849-01	Yes	47	GBM	3.39932
TCGA-06-0178-01A-01R-1849-01	Yes	192	GBM	3.53373
TCGA-06-0184-01A-01R-1849-01	Yes	1276	GBM	2.61457
TCGA-06-0187-01A-01R-1849-01	Yes	531	GBM	3.12539
TCGA-06-0190-01A-01R-1849-01	Yes	88	GBM	2.44292
TCGA-06-0190-02A-01R-2005-01	Yes	88	GBM	2.08389
TCGA-06-0210-01A-01R-1849-01	Yes	67	GBM	3.30399
TCGA-06-0210-02A-01R-2005-01	Yes	67	GBM	2.42317
TCGA-06-0211-01A-01R-1849-01	Yes	53	GBM	2.14903
TCGA-06-0211-01B-01R-1849-01	Yes	53	GBM	2.37262
TCGA-06-0211-02A-02R-2005-01	Yes	53	GBM	2.76791
TCGA-06-0219-01A-01R-1849-01	Yes	22	GBM	3.15071
TCGA-06-0221-02A-11R-2005-01	Yes	260	GBM	4.26242
TCGA-06-0238-01A-02R-1849-01	Yes	311	GBM	2.93229
TCGA-06-0644-01A-02R-1849-01	Yes	85	GBM	1.70177
TCGA-06-0645-01A-01R-1849-01	Yes	175	GBM	2.52507
TCGA-06-0646-01A-01R-1849-01	Yes	90	GBM	3.15746
TCGA-06-0649-01B-01R-1849-01	Yes	64	GBM	3.18449
TCGA-06-0686-01A-01R-1849-01	Yes	160	GBM	3.17914
TCGA-06-0743-01A-01R-1849-01	Yes	176	GBM	2.44652
TCGA-06-0744-01A-01R-1849-01	Yes	1277	GBM	2.06202
TCGA-06-0745-01A-01R-1849-01	Yes	92	GBM	3.88353
TCGA-06-0747-01A-01R-1849-01	Yes	82	GBM	2.57597
TCGA-06-0749-01A-01R-1849-01	Yes	82	GBM	3.81122
TCGA-06-0750-01A-01R-1849-01	Yes	28	GBM	2.58775
TCGA-06-0878-01A-01R-1849-01	Yes	66	GBM	2.53371
TCGA-06-0882-01A-01R-1849-01	Yes	213	GBM	3.76845
TCGA-06-1804-01A-01R-1849-01	Yes	414	GBM	4.42208
TCGA-06-2557-01A-01R-1849-01	Yes	33	GBM	3.12762
TCGA-06-2558-01A-01R-1849-01	No	380	GBM	3.9203
TCGA-06-2559-01A-01R-1849-01	Yes	150	GBM	3.59383
TCGA-06-2561-01A-02R-1849-01	Yes	78	GBM	2.32423
TCGA-06-2562-01A-01R-1849-01	Yes	151	GBM	3.0943
TCGA-06-2563-01A-01R-1849-01	Yes	554	GBM	1.83499
TCGA-06-2564-01A-01R-1849-01	No	181	GBM	2.48406
TCGA-06-2565-01A-01R-1849-01	Yes	178	GBM	3.2915
TCGA-06-2567-01A-01R-1849-01	Yes	133	GBM	3.93328
TCGA-06-2569-01A-01R-1849-01	No	13	GBM	5.56397
TCGA-06-2570-01A-01R-1849-01	No	958	GBM	3.11836
TCGA-06-5408-01A-01R-1849-01	Yes	158	GBM	3.592
TCGA-06-5410-01A-01R-1849-01	Yes	108	GBM	2.34338
TCGA-06-5411-01A-01R-1849-01	Yes	214	GBM	4.07052
TCGA-06-5412-01A-01R-1849-01	Yes	88	GBM	2.31208
TCGA-06-5413-01A-01R-1849-01	Yes	195	GBM	2.80768
TCGA-06-5414-01A-01R-1849-01	Yes	167	GBM	2.62754
TCGA-06-5416-01A-01R-1849-01	No	204	GBM	3.96736
TCGA-06-5417-01A-01R-1849-01	No	155	GBM	4.28842
TCGA-06-5418-01A-01R-1849-01	Yes	83	GBM	3.41946
TCGA-06-5856-01A-01R-1849-01	Yes	114	GBM	2.97008
TCGA-06-5858-01A-01R-1849-01	Yes	97	GBM	3.38992
TCGA-06-5859-01A-01R-1849-01	No	139	GBM	3.06994
TCGA-08-0386-01A-01R-1849-01	Yes	427	GBM	3.71395
TCGA-09-0364-01A-02R-1564-13	Yes	395	OV	4.61242
TCGA-09-0366-01A-01R-1564-13	Yes	190	OV	2.95045
TCGA-09-0367-01A-01R-1564-13	Yes	547	OV	2.61756
TCGA-09-0369-01A-01R-1564-13	Yes	274	OV	6.16851
TCGA-09-1659-01B-01R-1564-13	Yes	304	OV	2.72879
TCGA-09-1661-01B-01R-1566-13	Yes	1169	OV	3.53028
TCGA-09-1662-01A-01R-1566-13	Yes	1046	OV	2.34886
TCGA-09-1665-01B-01R-1566-13	Yes	468	OV	4.24805
TCGA-09-1666-01A-01R-1566-13	Yes	480	OV	1.51258
TCGA-09-1667-01C-01R-1566-13	Yes	460	OV	4.02938
TCGA-09-1668-01B-01R-1566-13	No	1684	OV	2.84236
TCGA-09-1669-01A-01R-1566-13	No	928	OV	3.79116
TCGA-09-1670-01A-01R-1566-13	Yes	547	OV	2.1574
TCGA-09-1673-01A-01R-1566-13	No	92	OV	3.17656
TCGA-09-2044-01B-01R-1568-13	No	186	OV	2.21822
TCGA-09-2045-01A-01R-1568-13	Yes	631	OV	3.09798
TCGA-09-2048-01A-01R-1568-13	Yes	138	OV	5.04619
TCGA-09-2051-01A-01R-1568-13	Yes	583	OV	3.28684
TCGA-09-2053-01C-01R-1568-13	No	1209	OV	3.49948
TCGA-09-2054-01A-01R-1568-13	Yes	637	OV	4.91615
TCGA-09-2056-01B-01R-1568-13	No	379	OV	2.83005
TCGA-10-0927-01A-02R-1564-13	Yes	1001	OV	2.691
TCGA-10-0928-01A-02R-1564-13	Yes	563	OV	3.40122
TCGA-10-0931-01A-01R-1564-13	Yes	300	OV	3.63063
TCGA-10-0933-01A-01R-1569-13	Yes	356	OV	4.33056
TCGA-10-0936-01A-01R-1564-13	Yes	1123	OV	3.5705
TCGA-10-0937-01A-02R-1564-13	Yes	235	OV	2.88035
TCGA-10-0938-01A-02R-1564-13	Yes	362	OV	3.72221
TCGA-12-0616-01A-01R-1849-01	Yes	398	GBM	1.88339
TCGA-12-0618-01A-01R-1849-01	No	395	GBM	4.74359
TCGA-12-0619-01A-01R-1849-01	Yes	203	GBM	2.82055
TCGA-12-0821-01A-01R-1849-01	Yes	259	GBM	3.55318
TCGA-12-1597-01B-01R-1849-01	Yes	180	GBM	4.11584
TCGA-12-3650-01A-01R-1849-01	Yes	239	GBM	3.20549
TCGA-12-3652-01A-01R-1849-01	Yes	203	GBM	4.25629
TCGA-12-3653-01A-01R-1849-01	Yes	224	GBM	2.15449
TCGA-12-5295-01A-01R-1849-01	Yes	399	GBM	2.90456
TCGA-12-5299-01A-02R-1849-01	Yes	98	GBM	2.9583
TCGA-13-0714-01A-01R-1564-13	Yes	110	OV	3.06755
TCGA-13-0720-01A-01R-1564-13	Yes	292	OV	2.36432
TCGA-13-0724-01A-01R-1564-13	Yes	83	OV	4.40622
TCGA-13-0725-01A-01R-1564-13	Yes	190	OV	3.60682
TCGA-13-0726-01A-01R-1564-13	Yes	392	OV	4.05136
TCGA-13-0727-01A-01R-1564-13	Yes	253	OV	3.33745
TCGA-13-0730-01A-01R-1564-13	No	542	OV	4.81735
TCGA-13-0762-01A-01R-1564-13	Yes	1003	OV	6.1466
TCGA-13-0765-01A-01R-1564-13	Yes	668	OV	3.3342
TCGA-13-0766-01A-02R-1564-13	Yes	628	OV	3.20567
TCGA-13-0768-01A-01R-1569-13	Yes	398	OV	3.8792
TCGA-13-0795-01A-01R-1564-13	Yes	325	OV	1.724
TCGA-13-0797-01A-01R-1564-13	Yes	525	OV	3.86279
TCGA-13-0800-01A-01R-1564-13	Yes	1396	OV	6.18217
TCGA-13-0804-01A-01R-1564-13	Yes	329	OV	2.32582
TCGA-13-0883-01A-02R-1569-13	Yes	819	OV	2.57606
TCGA-13-0884-01B-01R-1565-13	Yes	1251	OV	2.20333
TCGA-13-0885-01A-02R-1569-13	No	3388	OV	2.65652
TCGA-13-0886-01A-01R-1569-13	No	4665	OV	1.6968
TCGA-13-0887-01A-01R-1564-13	Yes	514	OV	2.11083
TCGA-13-0888-01A-01R-1564-13	No	2811	OV	4.47077
TCGA-13-0891-01A-01R-1564-13	Yes	762	OV	3.26938
TCGA-13-0893-01B-01R-1565-13	Yes	461	OV	3.28112
TCGA-13-0897-01A-01R-1564-13	Yes	554	OV	3.39562
TCGA-13-0900-01B-01R-1565-13	No	4077	OV	3.51784
TCGA-13-0901-01B-01R-1565-13	Yes	390	OV	4.17952
TCGA-13-0905-01B-01R-1565-13	Yes	1535	OV	3.42449
TCGA-13-0906-01A-01R-1564-13	No	3619	OV	2.81246
TCGA-13-0908-01B-01R-1565-13	Yes	552	OV	2.5807
TCGA-13-0911-01A-01R-1564-13	Yes	279	OV	4.07838
TCGA-13-0913-02A-01R-1564-13	Yes	871	OV	2.83078
TCGA-13-0916-01A-01R-1564-13	No	1785	OV	3.61967
TCGA-13-0920-01A-01R-1564-13	Yes	297	OV	4.53289
TCGA-13-0923-01A-01R-1564-13	Yes	1719	OV	3.56433
TCGA-13-0924-01A-01R-1564-13	Yes	962	OV	2.29231
TCGA-13-1403-01A-01R-1565-13	Yes	418	OV	2.93478
TCGA-13-1404-01A-01R-1565-13	Yes	1581	OV	2.80496
TCGA-13-1405-01A-01R-1565-13	Yes	228	OV	2.90858
TCGA-13-1407-01A-01R-1565-13	Yes	1333	OV	4.08632
TCGA-13-1408-01A-01R-1565-13	Yes	765	OV	3.10257
TCGA-13-1409-01A-01R-1565-13	Yes	690	OV	4.22534
TCGA-13-1410-01A-01R-1565-13	Yes	319	OV	1.97889
TCGA-13-1411-01A-01R-1565-13	Yes	238	OV	3.29312
TCGA-13-1477-01A-01R-1565-13	Yes	235	OV	2.96601
TCGA-13-1483-01A-01R-1565-13	Yes	297	OV	3.63545
TCGA-13-1485-01A-02R-1565-13	Yes	170	OV	3.40863
TCGA-13-1487-01A-01R-1565-13	Yes	412	OV	4.58275
TCGA-13-1488-01A-01R-1565-13	Yes	351	OV	3.95535
TCGA-13-1489-01A-01R-1565-13	Yes	806	OV	4.18919
TCGA-13-1489-02A-01R-1565-13	Yes	806	OV	4.66986
TCGA-13-1492-01A-01R-1565-13	No	3819	OV	3.91309
TCGA-13-1495-01A-01R-1565-13	Yes	977	OV	3.81398
TCGA-13-1496-01A-01R-1565-13	No	129	OV	3.98433
TCGA-13-1497-01A-01R-1565-13	Yes	813	OV	2.70139
TCGA-13-1498-01A-01R-1565-13	Yes	534	OV	2.90211
TCGA-13-1499-01A-01R-1565-13	Yes	583	OV	4.0475
TCGA-13-1501-01A-01R-1565-13	Yes	392	OV	3.79912
TCGA-13-1505-01A-01R-1565-13	Yes	1561	OV	3.84769
TCGA-13-1506-01A-01R-1565-13	Yes	666	OV	3.54924
TCGA-13-1507-01A-01R-1565-13	Yes	324	OV	2.12793
TCGA-13-1509-01A-01R-1565-13	Yes	578	OV	3.3172
TCGA-13-1510-01A-02R-1565-13	Yes	1189	OV	4.18683
TCGA-13-1511-01A-01R-1565-13	Yes	459	OV	4.26882
TCGA-13-1512-01A-01R-1565-13	Yes	427	OV	4.50883
TCGA-13-2060-01A-01R-1568-13	Yes	1475	OV	3.97478
TCGA-13-A5FT-01A-11R-A406-31	No	2143	OV	4.2207
TCGA-14-0736-02A-01R-2005-01	Yes	128	GBM	3.12385
TCGA-14-0781-01B-01R-1849-01	Yes	29	GBM	2.82497
TCGA-14-0787-01A-01R-1849-01	No	68	GBM	3.10879
TCGA-14-0789-01A-01R-1849-01	Yes	105	GBM	3.47799
TCGA-14-0790-01B-01R-1849-01	Yes	419	GBM	2.70629
TCGA-14-0817-01A-01R-1849-01	No	164	GBM	2.80956
TCGA-14-0871-01A-01R-1849-01	No	880	GBM	4.44608
TCGA-14-1034-01A-01R-1849-01	Yes	282	GBM	2.73001
TCGA-14-1034-02B-01R-2005-01	Yes	282	GBM	2.89776
TCGA-14-1402-02A-01R-2005-01	Yes	333	GBM	2.72506
TCGA-14-1823-01A-01R-1849-01	Yes	140	GBM	2.01728
TCGA-14-1825-01A-01R-1850-01	Yes	82	GBM	2.64556
TCGA-14-1829-01A-01R-1850-01	No	218	GBM	2.05908
TCGA-14-2554-01A-01R-1850-01	Yes	532	GBM	2.65537
TCGA-15-0742-01A-01R-1850-01	Yes	232	GBM	2.87918
TCGA-15-1444-01A-02R-1850-01	Yes	1550	GBM	3.94296
TCGA-16-0846-01A-01R-1850-01	Yes	119	GBM	3.82261
TCGA-16-1045-01B-01R-1850-01	Yes	654	GBM	2.86019
TCGA-18-3406-01A-01R-0980-07	Yes	357	LUSC	3.94363
TCGA-18-3407-01A-01R-0980-07	No	136	LUSC	2.86888
TCGA-18-3408-01A-01R-0980-07	Yes	1793	LUSC	3.66611
TCGA-18-3409-01A-01R-0980-07	Yes	2291	LUSC	4.70128
TCGA-18-3410-01A-01R-0980-07	No	146	LUSC	1.37757
TCGA-18-3411-01A-01R-0980-07	No	3576	LUSC	3.0508
TCGA-18-3412-01A-01R-0980-07	Yes	273	LUSC	2.84792
TCGA-18-3414-01A-01R-0980-07	No	716	LUSC	4.67185
TCGA-18-3415-01A-01R-0980-07	No	2803	LUSC	3.12717
TCGA-18-3416-01A-01R-0980-07	Yes	940	LUSC	2.49996
TCGA-18-3417-01A-01R-1443-07	No	1097	LUSC	3.29483
TCGA-18-3419-01A-01R-0980-07	No	2811	LUSC	3.42976
TCGA-18-3421-01A-01R-0980-07	No	2645	LUSC	3.52787
TCGA-18-4083-01A-01R-1100-07	No	188	LUSC	2.85806
TCGA-18-4086-01A-01R-1100-07	No	85	LUSC	2.7695
TCGA-18-4721-01A-01R-1443-07	No	4694	LUSC	2.86764
TCGA-18-5592-01A-01R-1635-07	No	1519	LUSC	3.72888
TCGA-18-5595-01A-01R-1635-07	No	827	LUSC	3.74707
TCGA-19-0957-02A-11R-2005-01	Yes	50	GBM	2.50388
TCGA-19-1389-02A-21R-2005-01	Yes	81	GBM	1.67265
TCGA-19-1390-01A-01R-1850-01	No	772	GBM	2.42567
TCGA-19-1787-01B-01R-1850-01	Yes	308	GBM	1.54369
TCGA-19-2619-01A-01R-1850-01	Yes	146	GBM	2.44599
TCGA-19-2620-01A-01R-1850-01	No	148	GBM	2.24832
TCGA-19-2624-01A-01R-1850-01	No	5	GBM	3.12781
TCGA-19-2625-01A-01R-1850-01	No	124	GBM	3.24396
TCGA-19-2629-01A-01R-1850-01	Yes	145	GBM	3.13822
TCGA-19-4065-01A-01R-2005-01	Yes	70	GBM	2.47407
TCGA-19-4065-02A-11R-2005-01	Yes	70	GBM	2.92499
TCGA-19-5960-01A-11R-1850-01	Yes	382	GBM	4.10662
TCGA-20-0987-01A-02R-1564-13	Yes	442	OV	4.85982
TCGA-20-0991-01A-01R-1564-13	No	797	OV	3.64121
TCGA-20-1682-01A-01R-1564-13	No	837	OV	3.33683
TCGA-20-1683-01A-01R-1566-13	Yes	618	OV	3.39083
TCGA-20-1686-01A-01R-1566-13	No	89	OV	3.06802
TCGA-20-1687-01A-01R-1566-13	No	81	OV	3.61201
TCGA-21-1070-01A-01R-0692-07	No	3636	LUSC	3.16131
TCGA-21-1071-01A-01R-0692-07	Yes	993	LUSC	2.22928
TCGA-21-1072-01A-01R-0692-07	No	3016	LUSC	3.57983
TCGA-21-1075-01A-01R-0692-07	No	2134	LUSC	4.59225
TCGA-21-1076-01A-01R-0692-07	Yes	1575	LUSC	3.28611
TCGA-21-1076-01A-02R-0692-07	Yes	1575	LUSC	3.15937
TCGA-21-1077-01A-01R-0692-07	Yes	644	LUSC	2.91812
TCGA-21-1078-01A-01R-0692-07	Yes	257	LUSC	1.93353
TCGA-21-1079-01A-01R-0692-07	Yes	317	LUSC	2.82745
TCGA-21-1080-01A-01R-0692-07	No	3724	LUSC	3.85144
TCGA-21-1081-01A-01R-0692-07	Yes	284	LUSC	4.35796
TCGA-21-1082-01A-01R-0692-07	No	3644	LUSC	2.78172
TCGA-21-1083-01A-01R-0692-07	No	1315	LUSC	2.92497
TCGA-21-5782-01A-01R-1635-07	No	962	LUSC	3.80996
TCGA-21-5783-01A-41R-2187-07	No	2680	LUSC	4.21627
TCGA-21-5784-01A-01R-1635-07	No	1268	LUSC	5.07705
TCGA-21-5786-01A-01R-1635-07	Yes	817	LUSC	3.4626
TCGA-21-5787-01A-01R-1635-07	Yes	103	LUSC	3.61732
TCGA-21-A5DI-01A-31R-A26W-07	No	979	LUSC	3.12456
TCGA-22-0940-01A-01R-0692-07	Yes	669	LUSC	2.27617
TCGA-22-0944-01A-01R-0692-07	No	223	LUSC	4.16942
TCGA-22-1000-01A-01R-A32Z-07	Yes	263	LUSC	1.99201
TCGA-22-1002-01A-01R-0692-07	No	131	LUSC	2.05918
TCGA-22-1005-01A-01R-0692-07	No	1953	LUSC	1.11557
TCGA-22-1011-01A-01R-0692-07	No	53	LUSC	2.77254
TCGA-22-1012-01A-01R-0692-07	No	429	LUSC	4.66274
TCGA-22-1016-01A-01R-0692-07	No	822	LUSC	3.39456
TCGA-22-1017-01A-01R-0692-07	Yes	904	LUSC	2.10591
TCGA-22-4591-01A-01R-1201-07	Yes	443	LUSC	3.29977
TCGA-22-4593-01A-21R-1820-07	No	1067	LUSC	3.04672
TCGA-22-4594-01A-01R-1201-07	No	1470	LUSC	2.19497
TCGA-22-4595-01A-01R-1201-07	Yes	250	LUSC	3.32839
TCGA-22-4596-01A-01R-1201-07	No	17	LUSC	2.8654
TCGA-22-4599-01A-01R-1443-07	No	1161	LUSC	2.53625
TCGA-22-4601-01A-01R-1443-07	Yes	525	LUSC	5.12309
TCGA-22-4604-01A-01R-1201-07	Yes	306	LUSC	3.09646
TCGA-22-4605-01A-21R-2125-07	No	974	LUSC	4.60584
TCGA-22-4607-01A-01R-1201-07	No	587	LUSC	2.88518
TCGA-22-4609-01A-21R-2125-07	No	291	LUSC	4.13116
TCGA-22-4613-01A-01R-1443-07	No	358	LUSC	4.10563
TCGA-22-5471-01A-01R-1635-07	Yes	229	LUSC	3.85737
TCGA-22-5472-01A-01R-1635-07	Yes	746	LUSC	3.67871
TCGA-22-5473-01A-01R-1635-07	Yes	1655	LUSC	3.85817
TCGA-22-5474-01A-01R-1635-07	No	445	LUSC	2.37593
TCGA-22-5477-01A-01R-1635-07	Yes	511	LUSC	1.90092
TCGA-22-5478-01A-01R-1635-07	No	24	LUSC	4.33842
TCGA-22-5479-01A-31R-1949-07	No	2625	LUSC	3.63007
TCGA-22-5480-01A-01R-1635-07	Yes	1779	LUSC	2.19793
TCGA-22-5481-01A-31R-1949-07	Yes	346	LUSC	3.52123
TCGA-22-5482-01A-01R-1635-07	No	357	LUSC	5.18564
TCGA-22-5483-01A-01R-1820-07	Yes	568	LUSC	2.39083
TCGA-22-5485-01A-01R-1635-07	Yes	840	LUSC	2.80538
TCGA-22-5489-01A-01R-1635-07	Yes	428	LUSC	2.89765
TCGA-22-5491-01A-01R-1635-07	No	1713	LUSC	3.27824
TCGA-22-5492-01A-01R-1635-07	No	506	LUSC	2.36126
TCGA-22-A5C4-01A-12R-A27Q-07	No	671	LUSC	3.51602
TCGA-23-1021-01B-01R-1564-13	Yes	1446	OV	2.42331
TCGA-23-1022-01A-01R-1564-13	Yes	450	OV	5.39309
TCGA-23-1023-01A-02R-1564-13	Yes	490	OV	2.62349
TCGA-23-1024-01A-02R-1564-13	No	468	OV	4.06175
TCGA-23-1026-01B-01R-1569-13	Yes	797	OV	2.92317
TCGA-23-1027-01A-02R-1564-13	Yes	114	OV	3.27536
TCGA-23-1028-01A-01R-1564-13	Yes	133	OV	2.9072
TCGA-23-1029-01B-01R-1567-13	No	268	OV	2.52072
TCGA-23-1030-01A-02R-1564-13	Yes	544	OV	2.05523
TCGA-23-1107-01A-01R-1564-13	Yes	9	OV	2.96057
TCGA-23-1109-01A-01R-1564-13	Yes	987	OV	2.24659
TCGA-23-1110-01A-01R-1564-13	Yes	326	OV	4.64537
TCGA-23-1111-01A-01R-1567-13	No	98	OV	1.70461
TCGA-23-1113-01A-01R-1564-13	Yes	949	OV	3.32302
TCGA-23-1114-01B-01R-1566-13	Yes	634	OV	4.35728
TCGA-23-1116-01A-01R-1564-13	Yes	286	OV	3.43543
TCGA-23-1118-01A-01R-1564-13	No	2616	OV	2.45207
TCGA-23-1119-01A-02R-1565-13	Yes	3378	OV	4.20604
TCGA-23-1120-01A-02R-1565-13	No	130	OV	3.94646
TCGA-23-1122-01A-01R-1565-13	Yes	447	OV	3.2841
TCGA-23-1123-01A-01R-1565-13	Yes	1018	OV	4.49395
TCGA-23-1809-01A-01R-1566-13	No	16	OV	3.73382
TCGA-23-2077-01A-01R-1568-13	Yes	1232	OV	4.10275
TCGA-23-2078-01A-01R-1568-13	No	2661	OV	3.70119
TCGA-23-2084-01A-02R-1568-13	Yes	619	OV	3.07056
TCGA-24-0966-01A-01R-1564-13	No	232	OV	2.21704
TCGA-24-0968-01A-01R-1569-13	Yes		OV	2.57352
TCGA-24-0970-01B-01R-1565-13	Yes	280	OV	2.99117
TCGA-24-0979-01A-01R-1565-13	Yes	428	OV	3.1832
TCGA-24-0982-01A-01R-1565-13	Yes	153	OV	3.15308
TCGA-24-1103-01A-01R-1565-13	Yes	678	OV	3.01402
TCGA-24-1104-01A-01R-1565-13	Yes	959	OV	2.70334
TCGA-24-1105-01A-01R-1565-13	Yes	470	OV	3.94262
TCGA-24-1413-01A-01R-1565-13	No	192	OV	2.98455
TCGA-24-1416-01A-01R-1565-13	No	194	OV	1.92345
TCGA-24-1417-01A-01R-1565-13	No	238	OV	3.07782
TCGA-24-1418-01A-01R-1565-13	No	243	OV	2.19969
TCGA-24-1419-01A-01R-1565-13	No	239	OV	4.4724
TCGA-24-1422-01A-01R-1565-13	No	23	OV	2.69357
TCGA-24-1423-01A-01R-1565-13	No	190	OV	3.82402
TCGA-24-1424-01A-01R-1565-13	No	183	OV	4.35992
TCGA-24-1425-01A-02R-1566-13	No	181	OV	2.12191
TCGA-24-1426-01A-01R-1565-13	No	163	OV	2.01432
TCGA-24-1427-01A-01R-1565-13	No	147	OV	3.33708
TCGA-24-1428-01A-01R-1564-13	Yes	448	OV	3.10414
TCGA-24-1430-01A-01R-1566-13	Yes	449	OV	3.93473
TCGA-24-1431-01A-01R-1566-13	Yes	199	OV	1.71444
TCGA-24-1434-01A-01R-1566-13	Yes	337	OV	2.70399
TCGA-24-1435-01A-01R-1566-13	Yes	505	OV	4.1916
TCGA-24-1464-01A-01R-1566-13	Yes	323	OV	3.55818
TCGA-24-1467-01A-01R-1566-13	Yes	1253	OV	3.00247
TCGA-24-1469-01A-01R-1566-13	No	277	OV	4.04832
TCGA-24-1470-01A-01R-1566-13	No	105	OV	3.47102
TCGA-24-1471-01A-01R-1566-13	No	36	OV	2.1335
TCGA-24-1474-01A-01R-1566-13	Yes	332	OV	5.25029
TCGA-24-1544-01A-01R-1566-13	Yes	643	OV	5.23073
TCGA-24-1546-01A-01R-1566-13	No	1955	OV	5.04357
TCGA-24-1549-01A-01R-1566-13	Yes	1042	OV	2.98474
TCGA-24-1550-01A-01R-1566-13	Yes	892	OV	4.39812
TCGA-24-1551-01A-01R-1566-13	Yes	764	OV	2.62476
TCGA-24-1552-01A-01R-1566-13	Yes	403	OV	2.86055
TCGA-24-1553-01A-01R-1566-13	Yes	553	OV	3.86382
TCGA-24-1557-01A-01R-1566-13	Yes	447	OV	3.3084
TCGA-24-1558-01A-01R-1566-13	Yes	273	OV	4.60085
TCGA-24-1560-01A-01R-1566-13	Yes	143	OV	2.98149
TCGA-24-1562-01A-01R-1566-13	Yes	229	OV	2.93529
TCGA-24-1563-01A-01R-1566-13	Yes	396	OV	3.04597
TCGA-24-1564-01A-01R-1566-13	Yes	221	OV	3.71565
TCGA-24-1565-01A-01R-1566-13	Yes	145	OV	2.50909
TCGA-24-1567-01A-01R-1566-13	Yes	319	OV	5.53963
TCGA-24-1603-01A-01R-1566-13	Yes	992	OV	3.06803
TCGA-24-1604-01A-01R-1566-13	Yes	2688	OV	2.94403
TCGA-24-1616-01A-01R-1566-13	Yes	405	OV	3.19142
TCGA-24-1842-01A-01R-1567-13	No	253	OV	3.23016
TCGA-24-1843-01A-01R-1567-13	No	106	OV	2.60739
TCGA-24-1844-01A-01R-1567-13	No	113	OV	3.89898
TCGA-24-1845-01A-01R-1567-13	No	116	OV	2.71169
TCGA-24-1846-01A-01R-1567-13	No	133	OV	2.86324
TCGA-24-1847-01A-01R-1566-13	No	343	OV	2.4557
TCGA-24-1850-01A-01R-1567-13	No	168	OV	4.45418
TCGA-24-1923-01A-01R-1567-13	Yes	343	OV	3.22172
TCGA-24-1924-01A-01R-1567-13	Yes	320	OV	3.53277
TCGA-24-1928-01A-01R-1567-13	Yes	70	OV	2.76909
TCGA-24-1930-01A-01R-1567-13	Yes	544	OV	1.97379
TCGA-24-2020-01A-01R-1567-13	Yes	723	OV	3.41171
TCGA-24-2023-01A-01R-1567-13	Yes	1069	OV	2.80166
TCGA-24-2024-01A-02R-1568-13	Yes	421	OV	3.6063
TCGA-24-2026-01A-01R-1567-13	No	1059	OV	3.87611
TCGA-24-2027-01A-01R-1567-13	Yes	617	OV	3.28419
TCGA-24-2033-01A-01R-1568-13	Yes	351	OV	3.1927
TCGA-24-2035-01A-01R-1568-13	Yes	287	OV	1.43728
TCGA-24-2036-01A-01R-1568-13	Yes	914	OV	3.28321
TCGA-24-2038-01A-01R-1568-13	Yes	1169	OV	2.20786
TCGA-24-2254-01A-01R-1568-13	Yes	606	OV	3.82546
TCGA-24-2261-01A-01R-1568-13	Yes	24	OV	3.14094
TCGA-24-2262-01A-01R-1568-13	Yes	11	OV	4.43403
TCGA-24-2267-01A-01R-1568-13	Yes	512	OV	2.2286
TCGA-24-2271-01A-01R-1568-13	Yes	827	OV	2.55795
TCGA-24-2280-01A-01R-1568-13	Yes	535	OV	3.52293
TCGA-24-2281-01A-01R-1568-13	No	1357	OV	2.71477
TCGA-24-2288-01A-01R-1568-13	Yes	25	OV	2.93655
TCGA-24-2289-01A-01R-1568-13	Yes	568	OV	3.42373
TCGA-24-2290-01A-01R-1568-13	Yes	324	OV	2.12565
TCGA-24-2293-01A-01R-1568-13	No	506	OV	1.85096
TCGA-24-2297-01A-01R-1568-13	No	1699	OV	2.50284
TCGA-24-2298-01A-01R-1569-13	Yes	469	OV	2.61648
TCGA-25-1312-01A-01R-1565-13	No	31	OV	1.76396
TCGA-25-1313-01A-01R-1565-13	Yes	394	OV	2.10145
TCGA-25-1315-01A-01R-1565-13	Yes	153	OV	3.97604
TCGA-25-1316-01A-01R-1565-13	Yes	276	OV	5.89921
TCGA-25-1317-01A-01R-1565-13	No	61	OV	4.87858
TCGA-25-1318-01A-01R-1565-13	Yes	185	OV	3.57754
TCGA-25-1319-01A-01R-1565-13	Yes	730	OV	3.66111
TCGA-25-1320-01A-01R-1565-13	Yes	424	OV	3.65297
TCGA-25-1321-01A-01R-1565-13	Yes	454	OV	2.89272
TCGA-25-1322-01A-01R-1565-13	Yes	91	OV	3.04867
TCGA-25-1323-01A-01R-1565-13	Yes	365	OV	4.87282
TCGA-25-1326-01A-01R-1565-13	Yes	396	OV	3.59736
TCGA-25-1328-01A-01R-1565-13	Yes	244	OV	2.42019
TCGA-25-1329-01A-01R-1565-13	No	457	OV	3.20566
TCGA-25-1623-01A-01R-1566-13	Yes	342	OV	2.9119
TCGA-25-1626-01A-01R-1566-13	Yes	318	OV	2.4969
TCGA-25-1627-01A-01R-1566-13	No	394	OV	3.73816
TCGA-25-1628-01A-01R-1566-13	Yes	287	OV	3.35062
TCGA-25-1630-01A-01R-1566-13	No	1162	OV	3.22788
TCGA-25-1631-01A-01R-1569-13	No	9	OV	3.36199
TCGA-25-1632-01A-01R-1566-13	Yes	537	OV	4.13754
TCGA-25-1633-01A-01R-1566-13	Yes	616	OV	4.55469
TCGA-25-1634-01A-01R-1566-13	Yes	380	OV	3.87141
TCGA-25-1635-01A-01R-1566-13	Yes	614	OV	3.26437
TCGA-25-1870-01A-01R-1567-13	Yes	243	OV	2.44806
TCGA-25-1877-01A-01R-1567-13	Yes	549	OV	4.96125
TCGA-25-2042-01A-01R-1568-13	Yes	396	OV	2.37868
TCGA-25-2391-01A-01R-1569-13	No	1492	OV	3.55128
TCGA-25-2392-01A-01R-1569-13	No	31	OV	2.86279
TCGA-25-2393-01A-01R-1569-13	Yes	305	OV	4.37145
TCGA-25-2396-01A-01R-1569-13	No	92	OV	2.01596
TCGA-25-2397-01A-01R-1569-13	No	365	OV	2.69851
TCGA-25-2398-01A-01R-1569-13	Yes	577	OV	3.80121
TCGA-25-2399-01A-01R-1569-13	Yes	243	OV	3.73144
TCGA-25-2400-01A-01R-1569-13	Yes	577	OV	3.07451
TCGA-25-2401-01A-01R-1569-13	No	90	OV	2.41129
TCGA-25-2404-01A-01R-1569-13	Yes	426	OV	2.96412
TCGA-25-2409-01A-01R-1569-13	Yes	304	OV	2.25005
TCGA-26-1442-01A-01R-1850-01	No	953	GBM	3.40364
TCGA-26-5132-01A-01R-1850-01	No	286	GBM	4.67452
TCGA-26-5133-01A-01R-1850-01	Yes	370	GBM	3.53442
TCGA-26-5134-01A-01R-1850-01	No	167	GBM	3.46019
TCGA-26-5135-01A-01R-1850-01	No	270	GBM	3.51116
TCGA-26-5136-01B-01R-1850-01	Yes	577	GBM	4.23747
TCGA-26-5139-01A-01R-1850-01	No	48	GBM	2.89631
TCGA-27-1830-01A-01R-1850-01	Yes	124	GBM	2.60777
TCGA-27-1831-01A-01R-1850-01	Yes	144	GBM	1.80995
TCGA-27-1832-01A-01R-1850-01	Yes	176	GBM	2.79844
TCGA-27-1834-01A-01R-1850-01	Yes	335	GBM	3.25479
TCGA-27-1835-01A-01R-1850-01	Yes	157	GBM	1.9571
TCGA-27-1837-01A-01R-1850-01	Yes	136	GBM	2.58253
TCGA-27-2519-01A-01R-1850-01	Yes	256	GBM	2.98698
TCGA-27-2521-01A-01R-1850-01	Yes	510	GBM	3.83128
TCGA-27-2523-01A-01R-1850-01	Yes	402	GBM	2.33368
TCGA-27-2524-01A-01R-1850-01	Yes	231	GBM	2.97471
TCGA-27-2526-01A-01R-1850-01	Yes	87	GBM	2.15264
TCGA-27-2528-01A-01R-1850-01	Yes	72	GBM	2.90508
TCGA-28-1747-01C-01R-1850-01	No	77	GBM	3.06924
TCGA-28-1753-01A-01R-1850-01	No	37	GBM	1.78509
TCGA-28-2499-01A-01R-1850-01	No	95	GBM	2.39854
TCGA-28-2509-01A-01R-1850-01	No	145	GBM	4.0179
TCGA-28-2513-01A-01R-1850-01	Yes	75	GBM	1.9668
TCGA-28-2514-01A-02R-1850-01	No	160	GBM	3.96021
TCGA-28-5204-01A-01R-1850-01	Yes	454	GBM	2.1859
TCGA-28-5207-01A-01R-1850-01	Yes	343	GBM	3.00394
TCGA-28-5208-01A-01R-1850-01	Yes	148	GBM	3.19676
TCGA-28-5209-01A-01R-1850-01	No	442	GBM	2.59364
TCGA-28-5213-01A-01R-1850-01	No	951	GBM	2.62555
TCGA-28-5215-01A-01R-1850-01	Yes	164	GBM	2.28386
TCGA-28-5216-01A-01R-1850-01	No	415	GBM	3.69237
TCGA-28-5218-01A-01R-1850-01	No	157	GBM	1.76048
TCGA-28-5220-01A-01R-1850-01	Yes	262	GBM	2.22555
TCGA-29-1688-01A-01R-1566-13	Yes	184	OV	2.3425
TCGA-29-1690-01A-01R-1566-13	Yes	1448	OV	3.87402
TCGA-29-1691-01A-01R-1566-13	Yes	613	OV	3.92686
TCGA-29-1693-01A-01R-1567-13	Yes	694	OV	3.52222
TCGA-29-1694-01A-01R-1567-13	Yes	1187	OV	3.63156
TCGA-29-1695-01A-01R-1567-13	No	1229	OV	3.40972
TCGA-29-1696-01A-01R-1567-13	Yes	342	OV	3.34042
TCGA-29-1697-01A-01R-1567-13	Yes	500	OV	3.36958
TCGA-29-1701-01A-01R-1567-13	Yes	298	OV	3.28828
TCGA-29-1703-01A-01R-1567-13	Yes	324	OV	4.27222
TCGA-29-1705-01A-01R-1567-13	Yes	283	OV	2.27545
TCGA-29-1707-02A-01R-1567-13	Yes	1201	OV	2.89321
TCGA-29-1710-01A-02R-1567-13	Yes	315	OV	3.25372
TCGA-29-1711-01A-01R-1567-13	No	1053	OV	3.58747
TCGA-29-1761-01A-01R-1567-13	Yes	528	OV	2.68975
TCGA-29-1762-01A-01R-1567-13	Yes	1375	OV	4.51273
TCGA-29-1763-01A-02R-1567-13	Yes	428	OV	4.35621
TCGA-29-1766-01A-01R-1567-13	Yes	672	OV	3.49436
TCGA-29-1768-01A-01R-1567-13	Yes	547	OV	2.44414
TCGA-29-1769-01A-01R-1567-13	No	699	OV	3.8225
TCGA-29-1770-01A-01R-1567-13	Yes	377	OV	2.52742
TCGA-29-1774-01A-01R-1567-13	Yes	234	OV	4.86457
TCGA-29-1776-01A-01R-1567-13	No	360	OV	2.79477
TCGA-29-1777-01A-01R-1567-13	No	374	OV	2.70591
TCGA-29-1778-01A-01R-1567-13	No	454	OV	2.31208
TCGA-29-1781-01A-01R-1567-13	No	255	OV	2.43379
TCGA-29-1783-01A-01R-1567-13	No	220	OV	3.06931
TCGA-29-1784-01A-02R-1567-13	No	163	OV	3.40932
TCGA-29-1785-01A-01R-1567-13	Yes	473	OV	2.58532
TCGA-29-2414-01A-02R-1569-13	Yes	552	OV	4.25401
TCGA-29-2414-02A-01R-1569-13	Yes	552	OV	3.79843
TCGA-29-2425-01A-01R-1569-13	Yes	1577	OV	4.13288
TCGA-29-2427-01A-01R-1569-13	Yes	1582	OV	1.88799
TCGA-29-2428-01A-01R-1569-13	No	1372	OV	5.022
TCGA-29-A5NZ-01A-11R-A406-31	Yes	358	OV	3.7098
TCGA-2A-A8VL-01A-21R-A37L-07	No	621	PRAD	1.80966
TCGA-2A-A8VO-01A-11R-A37L-07	No	1701	PRAD	1.60008
TCGA-2A-A8VT-01A-11R-A37L-07	No	1373	PRAD	2.18237
TCGA-2A-A8VV-01A-11R-A37L-07	No	671	PRAD	1.76757
TCGA-2A-A8VX-01A-11R-A37L-07	No	1378	PRAD	2.33248
TCGA-2A-A8W1-01A-11R-A37L-07	No	112	PRAD	1.13172
TCGA-2A-A8W3-01A-11R-A37L-07	Yes	198	PRAD	4.81607
TCGA-2A-AAYF-01A-11R-A41O-07	No	1364	PRAD	2.04987
TCGA-2A-AAYO-01A-11R-A41O-07	No	1272	PRAD	1.79427
TCGA-2A-AAYU-01A-11R-A41O-07	No	615	PRAD	2.00482
TCGA-2E-A9G8-01A-11R-A40A-07	Yes	335	UCEC	3.41823
TCGA-2F-A9KO-01A-11R-A38B-07	Yes	651	BLCA	1.87011
TCGA-2F-A9KP-01A-11R-A38B-07	Yes	343	BLCA	2.52692
TCGA-2F-A9KQ-01A-11R-A38B-07	No	2886	BLCA	2.64238
TCGA-2F-A9KR-01A-11R-A38B-07	Yes	3086	BLCA	4.87458
TCGA-2F-A9KT-01A-11R-A38B-07	No	3314	BLCA	3.43429
TCGA-2F-A9KW-01A-11R-A38B-07	Yes	85	BLCA	1.05728
TCGA-2G-AAEW-01A-11R-A430-07	Yes	143	TGCT	3.86145
TCGA-2G-AAEX-01A-11R-A430-07	No	1259	TGCT	3.67129
TCGA-2G-AAF1-01A-11R-A430-07	No	1403	TGCT	3.63901
TCGA-2G-AAF4-01A-11R-A430-07	No	2315	TGCT	3.27676
TCGA-2G-AAF6-01A-11R-A430-07	Yes	810	TGCT	3.86921
TCGA-2G-AAF8-01A-11R-A430-07	Yes	3149	TGCT	3.91692
TCGA-2G-AAFE-01A-11R-A430-07	Yes	617	TGCT	4.12192
TCGA-2G-AAFG-01A-11R-A430-07	Yes	2495	TGCT	3.59979
TCGA-2G-AAFG-05A-11R-A430-07	Yes	2495	TGCT	3.5501
TCGA-2G-AAFH-01A-12R-A430-07	No	1375	TGCT	2.82224
TCGA-2G-AAFI-01A-21R-A430-07	No	675	TGCT	2.48316
TCGA-2G-AAFJ-01A-11R-A430-07	Yes	313	TGCT	3.08928
TCGA-2G-AAFL-01A-21R-A430-07	Yes	38	TGCT	2.33282
TCGA-2G-AAFM-01A-11R-A430-07	No	503	TGCT	3.54289
TCGA-2G-AAFN-01A-31R-A430-07	No	773	TGCT	2.82737
TCGA-2G-AAFO-01A-31R-A430-07	No	685	TGCT	2.7411
TCGA-2G-AAFV-01A-11R-A430-07	No	1389	TGCT	2.82823
TCGA-2G-AAFY-01A-11R-A430-07	No	1099	TGCT	2.17913
TCGA-2G-AAFZ-01A-11R-A430-07	No	1353	TGCT	2.40248
TCGA-2G-AAG0-01A-11R-A430-07	Yes	90	TGCT	2.35885
TCGA-2G-AAG3-01A-11R-A430-07	Yes	181	TGCT	3.58861
TCGA-2G-AAG5-01A-11R-A430-07	Yes	451	TGCT	2.71427
TCGA-2G-AAG6-01A-11R-A430-07	No	2231	TGCT	2.71861
TCGA-2G-AAG7-01A-11R-A430-07	No	2475	TGCT	2.4995
TCGA-2G-AAG8-01A-31R-A430-07	No	2289	TGCT	2.24814
TCGA-2G-AAG9-01A-11R-A430-07	No	2234	TGCT	3.87212
TCGA-2G-AAGA-01A-11R-A430-07	No	2439	TGCT	2.35502
TCGA-2G-AAGC-01A-21R-A430-07	Yes	317	TGCT	2.80172
TCGA-2G-AAGE-01A-21R-A430-07	Yes	121	TGCT	2.27953
TCGA-2G-AAGF-01A-31R-A430-07	Yes	139	TGCT	2.79489
TCGA-2G-AAGG-01A-11R-A430-07	No	2611	TGCT	2.44186
TCGA-2G-AAGI-01A-11R-A430-07	Yes	2193	TGCT	2.62616
TCGA-2G-AAGI-05A-11R-A430-07	Yes	2193	TGCT	3.80038
TCGA-2G-AAGJ-01A-11R-A430-07	Yes	171	TGCT	1.67143
TCGA-2G-AAGK-01A-11R-A430-07	Yes	713	TGCT	2.53677
TCGA-2G-AAGM-01A-11R-A430-07	No	3891	TGCT	1.90758
TCGA-2G-AAGN-01A-11R-A430-07	No	3656	TGCT	1.81348
TCGA-2G-AAGO-01A-11R-A430-07	No	4026	TGCT	2.37106
TCGA-2G-AAGP-01A-11R-A430-07	No	4018	TGCT	1.97845
TCGA-2G-AAGS-01A-11R-A430-07	No	4816	TGCT	3.18222
TCGA-2G-AAGT-01A-11R-A430-07	Yes	15	TGCT	2.28549
TCGA-2G-AAGV-01A-11R-A430-07	No	4527	TGCT	4.42545
TCGA-2G-AAGW-01A-11R-A430-07	No	4899	TGCT	2.3051
TCGA-2G-AAGX-01A-11R-A430-07	Yes	4323	TGCT	2.91718
TCGA-2G-AAGY-01A-11R-A430-07	Yes	623	TGCT	3.87251
TCGA-2G-AAGY-05A-11R-A430-07	Yes	623	TGCT	3.6378
TCGA-2G-AAGZ-01A-11R-A430-07	No	5233	TGCT	2.83883
TCGA-2G-AAH0-01A-11R-A430-07	Yes	107	TGCT	3.80699
TCGA-2G-AAH2-01A-11R-A430-07	No	6060	TGCT	2.86584
TCGA-2G-AAH3-01A-11R-A430-07	No	1822	TGCT	3.70558
TCGA-2G-AAH4-01A-12R-A430-07	No	6210	TGCT	3.24682
TCGA-2G-AAH8-01A-11R-A430-07	No	2248	TGCT	3.95458
TCGA-2G-AAHA-01A-11R-A430-07	No	3349	TGCT	4.31436
TCGA-2G-AAHC-01A-11R-A430-07	No	5539	TGCT	3.77923
TCGA-2G-AAHG-01A-11R-A430-07	No	1819	TGCT	4.47885
TCGA-2G-AAHL-01A-11R-A430-07	No	7081	TGCT	4.25404
TCGA-2G-AAHN-01A-11R-A430-07	No	6445	TGCT	4.10667
TCGA-2G-AAHP-01A-12R-A430-07	Yes	816	TGCT	4.70587
TCGA-2G-AAHP-05A-11R-A430-07	Yes	816	TGCT	3.89931
TCGA-2G-AAHT-01A-11R-A430-07	No	542	TGCT	3.75142
TCGA-2G-AAKD-01A-31R-A430-07	No	6340	TGCT	3.67013
TCGA-2G-AAKG-01A-11R-A430-07	Yes	122	TGCT	3.2034
TCGA-2G-AAKG-05A-11R-A430-07	Yes	122	TGCT	3.06357
TCGA-2G-AAKH-01A-11R-A430-07	No	6862	TGCT	1.81344
TCGA-2G-AAKL-01A-11R-A430-07	No	7023	TGCT	1.49503
TCGA-2G-AAKM-01A-11R-A430-07	No	6972	TGCT	2.56677
TCGA-2G-AAL5-01A-11R-A430-07	Yes	3723	TGCT	3.32007
TCGA-2G-AAL7-01A-11R-A430-07	Yes	2	TGCT	2.43898
TCGA-2G-AALP-01A-12R-A430-07	No	2645	TGCT	3.72384
TCGA-2H-A9GF-01A-11R-A37I-31	Yes	172	ESCA	1.84322
TCGA-2H-A9GG-01A-11R-A37I-31	Yes	504	ESCA	2.79244
TCGA-2H-A9GH-01A-11R-A37I-31	Yes	800	ESCA	2.43848
TCGA-2H-A9GI-01A-11R-A37I-31	Yes	400	ESCA	4.60447
TCGA-2H-A9GJ-01A-11R-A37I-31	Yes	1261	ESCA	2.63636
TCGA-2H-A9GK-01A-11R-A37I-31	Yes	113	ESCA	1.42186
TCGA-2H-A9GL-01A-12R-A37I-31	Yes	109	ESCA	0.910963
TCGA-2H-A9GM-01A-11R-A37I-31	Yes	367	ESCA	3.57931
TCGA-2H-A9GN-01A-11R-A37I-31	Yes	242	ESCA	3.17943
TCGA-2H-A9GO-01A-11R-A37I-31	Yes	362	ESCA	1.96905
TCGA-2H-A9GQ-01A-11R-A37I-31	Yes	112	ESCA	6.34143
TCGA-2H-A9GR-01A-12R-A37I-31	Yes	987	ESCA	3.22733
TCGA-2J-AAB1-01A-11R-A41B-07	No	66	PAAD	3.43273
TCGA-2J-AAB4-01A-12R-A41B-07	No	729	PAAD	4.30573
TCGA-2J-AAB6-01A-11R-A41B-07	Yes	169	PAAD	3.86717
TCGA-2J-AAB8-01A-12R-A41B-07	No	80	PAAD	4.45807
TCGA-2J-AAB9-01A-11R-A41B-07	Yes	521	PAAD	2.03854
TCGA-2J-AABA-01A-21R-A41B-07	Yes	160	PAAD	3.1203
TCGA-2J-AABE-01A-12R-A41B-07	No	676	PAAD	4.53124
TCGA-2J-AABF-01A-31R-A41B-07	Yes	443	PAAD	2.53104
TCGA-2J-AABH-01A-21R-A41B-07	Yes	1287	PAAD	5.15717
TCGA-2J-AABI-01A-12R-A41B-07	Yes	728	PAAD	2.57546
TCGA-2J-AABK-01A-31R-A41B-07	No	484	PAAD	3.80616
TCGA-2J-AABO-01A-21R-A41B-07	Yes	439	PAAD	2.12895
TCGA-2J-AABP-01A-11R-A41B-07	No	463	PAAD	2.16726
TCGA-2J-AABR-01A-11R-A41B-07	Yes	327	PAAD	1.77762
TCGA-2J-AABT-01A-11R-A41B-07	No	319	PAAD	3.75253
TCGA-2J-AABU-01A-11R-A41B-07	Yes	154	PAAD	3.49038
TCGA-2J-AABV-01A-12R-A41B-07	Yes	126	PAAD	1.09112
TCGA-2K-A9WE-01A-11R-A38C-07	No	214	KIRP	1.2759
TCGA-2L-AAQA-01A-21R-A38C-07	Yes	143	PAAD	5.34865
TCGA-2L-AAQE-01A-11R-A39D-07	Yes	684	PAAD	2.46344
TCGA-2L-AAQI-01A-12R-A39D-07	Yes	103	PAAD	3.64518
TCGA-2L-AAQJ-01A-12R-A39D-07	Yes	394	PAAD	4.35482
TCGA-2L-AAQL-01A-11R-A38C-07	Yes	292	PAAD	5.43393
TCGA-2L-AAQM-01A-11R-A39D-07	No	1383	PAAD	4.82955
TCGA-2V-A95S-01A-11R-A37K-07	No		LIHC	1.38565
TCGA-2W-A8YY-01A-11R-A37O-07	No	533	CESC	3.87802
TCGA-2X-A9D5-01A-11R-A430-07	No	435	TGCT	3.11016
TCGA-2X-A9D6-01A-11R-A430-07	No	607	TGCT	2.96029
TCGA-2Y-A9GS-01A-12R-A38B-07	Yes	102	LIHC	1.42787
TCGA-2Y-A9GT-01A-11R-A38B-07	Yes	1083	LIHC	0.338339
TCGA-2Y-A9GU-01A-11R-A38B-07	No	1939	LIHC	0.725523
TCGA-2Y-A9GV-01A-11R-A38B-07	Yes	1745	LIHC	0.545079
TCGA-2Y-A9GW-01A-11R-A38B-07	Yes	1229	LIHC	1.12068
TCGA-2Y-A9GX-01A-11R-A38B-07	Yes	2133	LIHC	0.540722
TCGA-2Y-A9GY-01A-11R-A38B-07	Yes	637	LIHC	2.59684
TCGA-2Y-A9GZ-01A-11R-A39D-07	Yes	719	LIHC	0.788017
TCGA-2Y-A9H0-01A-11R-A38B-07	No	3675	LIHC	1.97255
TCGA-2Y-A9H1-01A-11R-A38B-07	Yes	321	LIHC	1.49483
TCGA-2Y-A9H2-01A-12R-A38B-07	No	1731	LIHC	1.64432
TCGA-2Y-A9H3-01A-11R-A38B-07	Yes	22	LIHC	1.23346
TCGA-2Y-A9H4-01A-11R-A38B-07	No	1452	LIHC	1.0165
TCGA-2Y-A9H5-01A-11R-A38B-07	Yes	258	LIHC	1.9123
TCGA-2Y-A9H6-01A-11R-A39D-07	No	357	LIHC	0.612494
TCGA-2Y-A9H7-01A-11R-A39D-07	Yes	1117	LIHC	0.720629
TCGA-2Y-A9H8-01A-11R-A39D-07	Yes	398	LIHC	1.45159
TCGA-2Y-A9H9-01A-21R-A39D-07	Yes	59	LIHC	1.35321
TCGA-2Y-A9HA-01A-11R-A39D-07	Yes	36	LIHC	3.37092
TCGA-2Y-A9HB-01A-11R-A39D-07	No	260	LIHC	1.1516
TCGA-2Z-A9J1-01A-11R-A38C-07	No	2298	KIRP	2.08743
TCGA-2Z-A9J2-01A-11R-A38C-07	No	1795	KIRP	1.30206
TCGA-2Z-A9J3-01A-12R-A38C-07	Yes	790	KIRP	2.79275
TCGA-2Z-A9J5-01A-21R-A38C-07	No	3050	KIRP	2.28629
TCGA-2Z-A9J6-01A-11R-A38C-07	No	1731	KIRP	2.51468
TCGA-2Z-A9J7-01A-11R-A38C-07	Yes	96	KIRP	2.2216
TCGA-2Z-A9J8-01A-11R-A42S-07	Yes	506	KIRP	0.908044
TCGA-2Z-A9J9-01A-11R-A42S-07	No	2294	KIRP	2.83586
TCGA-2Z-A9JD-01A-11R-A42S-07	No	1060	KIRP	0.863621
TCGA-2Z-A9JE-01A-11R-A42S-07	No	1728	KIRP	2.00777
TCGA-2Z-A9JG-01A-11R-A42S-07	No	1662	KIRP	1.43691
TCGA-2Z-A9JI-01A-11R-A42S-07	Yes	286	KIRP	1.27417
TCGA-2Z-A9JJ-01A-11R-A42S-07	No	1213	KIRP	2.55582
TCGA-2Z-A9JK-01A-11R-A42S-07	Yes	324	KIRP	2.68104
TCGA-2Z-A9JL-01A-11R-A42S-07	No	1006	KIRP	1.30725
TCGA-2Z-A9JM-01A-12R-A42S-07	No	934	KIRP	1.68495
TCGA-2Z-A9JN-01A-21R-A42S-07	No	740	KIRP	0.861558
TCGA-2Z-A9JO-01A-11R-A42S-07	No	949	KIRP	0.679334
TCGA-2Z-A9JP-01A-11R-A42S-07	No	893	KIRP	1.56905
TCGA-2Z-A9JQ-01A-11R-A42S-07	Yes	600	KIRP	1.98441
TCGA-2Z-A9JR-01A-12R-A42S-07	No	161	KIRP	1.84639
TCGA-2Z-A9JS-01A-21R-A42S-07	No	492	KIRP	1.76141
TCGA-2Z-A9JT-01A-11R-A42S-07	No	684	KIRP	1.35004
TCGA-30-1714-01A-02R-1567-13	Yes	241	OV	5.36807
TCGA-30-1718-01A-01R-1567-13	Yes	896	OV	3.09722
TCGA-30-1853-01A-02R-1567-13	Yes	634	OV	3.21891
TCGA-30-1857-01A-02R-1569-13	Yes	8	OV	4.57226
TCGA-30-1860-01A-01R-1568-13	Yes	397	OV	2.26487
TCGA-30-1861-01A-01R-1568-13	No	1058	OV	2.74263
TCGA-30-1862-01A-02R-1568-13	Yes	186	OV	4.42738
TCGA-30-1866-01A-02R-1568-13	Yes	285	OV	3.0659
TCGA-30-1891-01A-01R-1568-13	Yes	181	OV	3.20325
TCGA-30-1892-01A-01R-1568-13	Yes	253	OV	2.45531
TCGA-31-1944-01A-01R-1568-13	Yes	678	OV	2.43614
TCGA-31-1946-01A-01R-1568-13	Yes	664	OV	2.72133
TCGA-31-1950-01A-01R-1568-13	Yes	349	OV	3.88799
TCGA-31-1951-01A-01R-1568-13	Yes	659	OV	2.04618
TCGA-31-1953-01A-01R-1568-13	Yes	70	OV	3.0486
TCGA-31-1956-01A-01R-1568-13	No	1342	OV	2.05832
TCGA-31-1959-01A-01R-1568-13	No	67	OV	3.19432
TCGA-32-1970-01A-01R-1850-01	Yes	408	GBM	2.71072
TCGA-32-1980-01A-01R-1850-01	Yes	36	GBM	3.85671
TCGA-32-1982-01A-01R-1850-01	Yes	142	GBM	2.18311
TCGA-32-2615-01A-01R-1850-01	Yes	131	GBM	2.47584
TCGA-32-2616-01A-01R-1850-01	Yes	182	GBM	3.94335
TCGA-32-2632-01A-01R-1850-01	Yes	269	GBM	1.8231
TCGA-32-2634-01A-01R-1850-01	No	693	GBM	3.0494
TCGA-32-2638-01A-01R-1850-01	Yes	766	GBM	2.1661
TCGA-32-4213-01A-01R-1850-01	Yes	353	GBM	2.52772
TCGA-32-5222-01A-01R-1850-01	Yes	118	GBM	3.1175
TCGA-33-4532-01A-01R-1201-07	No	3924	LUSC	3.60267
TCGA-33-4533-01A-01R-1201-07	No	4068	LUSC	3.49779
TCGA-33-4538-01A-01R-1201-07	No	2979	LUSC	3.18455
TCGA-33-4547-01A-01R-1201-07	No	2419	LUSC	2.81525
TCGA-33-4566-01A-01R-1443-07	No	5287	LUSC	3.82943
TCGA-33-4582-01A-01R-1443-07	Yes	2923	LUSC	4.90051
TCGA-33-4583-01A-01R-1443-07	No	4601	LUSC	3.50554
TCGA-33-4586-01A-01R-1443-07	Yes	169	LUSC	3.88733
TCGA-33-4587-01A-11R-2125-07	Yes	1656	LUSC	5.67601
TCGA-33-4589-01A-01R-1443-07	No	47	LUSC	2.32285
TCGA-33-6737-01A-11R-1820-07	Yes	601	LUSC	3.13172
TCGA-33-6738-01A-11R-1949-07	No	1927	LUSC	3.12511
TCGA-33-A4WN-01A-11R-A262-07	No	143	LUSC	2.96175
TCGA-33-A5GW-01A-11R-A27Q-07	No	9	LUSC	3.36917
TCGA-33-AAS8-01A-11R-A405-07	No	1114	LUSC	3.07276
TCGA-33-AASB-01A-11R-A405-07	Yes	30	LUSC	4.12136
TCGA-33-AASD-01A-11R-A405-07	Yes	1912	LUSC	3.05396
TCGA-33-AASI-01A-22R-A405-07	Yes	1344	LUSC	2.66218
TCGA-33-AASJ-01A-11R-A405-07	Yes	1135	LUSC	3.82271
TCGA-33-AASL-01A-11R-A405-07	Yes	149	LUSC	3.04264
TCGA-34-2596-01A-01R-0851-07	No	80	LUSC	2.40245
TCGA-34-2600-01A-01R-0851-07	No	1874	LUSC	3.5154
TCGA-34-2608-01A-02R-0851-07	No	1000	LUSC	3.52646
TCGA-34-5231-01A-21R-1820-07	No	1984	LUSC	4.95529
TCGA-34-5232-01A-21R-1820-07	No	2471	LUSC	2.63626
TCGA-34-5234-01A-01R-1635-07	No	2271	LUSC	2.25381
TCGA-34-5236-01A-21R-1820-07	Yes	113	LUSC	4.26493
TCGA-34-5239-01A-21R-1820-07	Yes	1530	LUSC	4.15988
TCGA-34-5240-01A-01R-1443-07	No	1541	LUSC	2.82295
TCGA-34-5241-01A-01R-1443-07	No	515	LUSC	2.5492
TCGA-34-5927-01A-11R-1820-07	Yes	245	LUSC	3.56834
TCGA-34-5928-01A-11R-1820-07	No	1196	LUSC	4.01181
TCGA-34-5929-01A-11R-1820-07	No	151	LUSC	3.85529
TCGA-34-7107-01A-11R-1949-07	No	34	LUSC	2.1113
TCGA-34-8454-01A-11R-2326-07	No	1180	LUSC	2.91823
TCGA-34-8455-01A-11R-2326-07	Yes	123	LUSC	3.13119
TCGA-34-8456-01A-21R-2326-07	No	804	LUSC	3.8172
TCGA-34-A5IX-01A-12R-A27Q-07	No	1031	LUSC	2.13511
TCGA-35-3615-01A-01R-0946-07	No	14	LUAD	2.11793
TCGA-35-4122-01A-01R-1107-07	No	225	LUAD	2.2652
TCGA-35-4123-01A-01R-1107-07	No	182	LUAD	3.32655
TCGA-35-5375-01A-01R-1628-07	No	264	LUAD	3.676
TCGA-36-1568-01A-01R-1566-13	Yes	548	OV	3.77588
TCGA-36-1569-01A-01R-1566-13	No	885	OV	3.13926
TCGA-36-1570-01A-01R-1566-13	Yes	375	OV	2.55643
TCGA-36-1571-01A-01R-1566-13	Yes	375	OV	3.22862
TCGA-36-1574-01A-01R-1566-13	Yes	648	OV	3.34443
TCGA-36-1576-01A-01R-1566-13	Yes	817	OV	4.41439
TCGA-36-1577-01A-01R-1566-13	No	783	OV	4.4144
TCGA-36-1580-01A-01R-1566-13	Yes	440	OV	2.45315
TCGA-36-1581-01A-01R-1566-13	Yes	702	OV	3.14949
TCGA-37-3783-01A-01R-1201-07	No	122	LUSC	3.48984
TCGA-37-3789-01A-01R-0980-07	No	13	LUSC	4.03952
TCGA-37-3792-01A-01R-0980-07	No	12	LUSC	1.80892
TCGA-37-4129-01A-01R-1100-07	No	242	LUSC	5.21419
TCGA-37-4130-01A-01R-1100-07	No	247	LUSC	3.44538
TCGA-37-4132-01A-01R-1100-07	No	227	LUSC	2.47721
TCGA-37-4133-01A-01R-1100-07	No	238	LUSC	3.0513
TCGA-37-4135-01A-01R-1100-07	No	207	LUSC	4.5232
TCGA-37-4141-01A-02R-1100-07	No	12	LUSC	3.53968
TCGA-37-5819-01A-01R-1635-07	No	103	LUSC	3.02089
TCGA-37-A5EL-01A-11R-A26W-07	Yes	946	LUSC	3.92429
TCGA-37-A5EM-01A-21R-A27Q-07	No	867	LUSC	4.33062
TCGA-37-A5EN-01A-21R-A26W-07	No	660	LUSC	4.92768
TCGA-38-4625-01A-01R-1206-07	No	2973	LUAD	2.31904
TCGA-38-4626-01A-01R-1206-07	Yes	2518	LUAD	1.31944
TCGA-38-4627-01A-01R-1206-07	No	1147	LUAD	1.48522
TCGA-38-4628-01A-01R-1206-07	Yes	1083	LUAD	1.86782
TCGA-38-4629-01A-02R-1206-07	Yes	379	LUAD	2.6169
TCGA-38-4630-01A-01R-1206-07	Yes	524	LUAD	4.79287
TCGA-38-4631-01A-01R-1755-07	Yes	354	LUAD	2.58443
TCGA-38-4632-01A-01R-1755-07	Yes	680	LUAD	2.78935
TCGA-38-6178-01A-11R-1755-07	No	448	LUAD	3.97279
TCGA-38-7271-01A-11R-2039-07	Yes	304	LUAD	1.67969
TCGA-38-A44F-01A-11R-A24H-07	No	133	LUAD	1.84812
TCGA-39-5011-01A-01R-1443-07	Yes	565	LUSC	1.52822
TCGA-39-5016-01A-01R-1443-07	No	3850	LUSC	2.03882
TCGA-39-5019-01A-01R-1820-07	Yes	378	LUSC	4.25525
TCGA-39-5021-01A-01R-1443-07	Yes	1875	LUSC	3.35209
TCGA-39-5022-01A-21R-1820-07	Yes	1448	LUSC	2.38538
TCGA-39-5024-01A-21R-1820-07	No	2510	LUSC	4.64385
TCGA-39-5027-01A-21R-1820-07	Yes	3081	LUSC	3.73878
TCGA-39-5028-01A-01R-1443-07	No	52	LUSC	3.65741
TCGA-39-5029-01A-01R-1443-07	Yes	491	LUSC	3.28176
TCGA-39-5030-01A-01R-1443-07	No	59	LUSC	1.76558
TCGA-39-5031-01A-01R-1443-07	No	1841	LUSC	5.30949
TCGA-39-5034-01A-01R-1443-07	Yes	352	LUSC	2.98096
TCGA-39-5035-01A-01R-1443-07	No	2080	LUSC	4.62932
TCGA-39-5036-01A-01R-1443-07	No	2165	LUSC	2.98408
TCGA-39-5037-01A-01R-1443-07	No	1690	LUSC	6.20933
TCGA-39-5039-01A-01R-1443-07	No	544	LUSC	2.61278
TCGA-39-5040-01A-21R-2125-07	Yes	442	LUSC	2.21083
TCGA-3A-A9I5-01A-11R-A38C-07	No	1794	PAAD	2.87346
TCGA-3A-A9I7-01A-21R-A38C-07	Yes	1309	PAAD	1.8246
TCGA-3A-A9I9-01A-11R-A38C-07	Yes	513	PAAD	3.91638
TCGA-3A-A9IB-01A-21R-A39D-07	No	224	PAAD	2.27784
TCGA-3A-A9IC-01A-11R-A38C-07	Yes	738	PAAD	4.14971
TCGA-3A-A9IH-01A-12R-A39D-07	Yes	763	PAAD	3.90662
TCGA-3A-A9IJ-01A-11R-A39D-07	No	1854	PAAD	0.825297
TCGA-3A-A9IL-01A-11R-A38C-07	No	2741	PAAD	0.83875
TCGA-3A-A9IN-01A-11R-A39D-07	No	2084	PAAD	2.33959
TCGA-3A-A9IO-01A-11R-A38C-07	No	1942	PAAD	3.03422
TCGA-3A-A9IR-01A-11R-A38C-07	No	1542	PAAD	1.93821
TCGA-3A-A9IS-01A-21R-A39D-07	No	998	PAAD	2.96621
TCGA-3A-A9IU-01A-11R-A39D-07	Yes	371	PAAD	3.2758
TCGA-3A-A9IV-01A-11R-A41B-07	No	1103	PAAD	3.36466
TCGA-3A-A9IX-01A-11R-A41B-07	No	1037	PAAD	2.1107
TCGA-3A-A9IZ-01A-12R-A41B-07	Yes	109	PAAD	4.48081
TCGA-3A-A9J0-01A-11R-A41B-07	Yes	363	PAAD	3.7878
TCGA-3B-A9HI-01A-11R-A38C-07	Yes	606	SARC	3.10918
TCGA-3B-A9HJ-01A-11R-A38C-07	No	1104	SARC	1.06537
TCGA-3B-A9HL-01A-11R-A38C-07	Yes	229	SARC	0.950244
TCGA-3B-A9HO-01A-11R-A38C-07	Yes	595	SARC	1.52887
TCGA-3B-A9HP-01A-11R-A38C-07	Yes	517	SARC	2.72744
TCGA-3B-A9HQ-01A-11R-A38C-07	No	2085	SARC	1.35952
TCGA-3B-A9HR-01A-11R-A38C-07	Yes	496	SARC	1.08257
TCGA-3B-A9HS-01A-11R-A39D-07	Yes	139	SARC	2.22512
TCGA-3B-A9HT-01A-11R-A39D-07	Yes	670	SARC	1.75467
TCGA-3B-A9HU-01A-11R-A39D-07	Yes	631	SARC	1.74825
TCGA-3B-A9HV-01A-11R-A39D-07	Yes	41	SARC	3.68351
TCGA-3B-A9HX-01A-11R-A39D-07	No	1303	SARC	3.39883
TCGA-3B-A9HY-01A-11R-A39D-07	No	314	SARC	1.31568
TCGA-3B-A9HZ-01A-11R-A39D-07	Yes	309	SARC	1.93934
TCGA-3B-A9I0-01A-11R-A39D-07	Yes	503	SARC	1.2383
TCGA-3B-A9I1-01A-11R-A39D-07	Yes	192	SARC	5.06017
TCGA-3B-A9I3-01A-11R-A39D-07	Yes	87	SARC	2.31063
TCGA-3C-AAAU-01A-11R-A41B-07	Yes	1808	BRCA	2.65675
TCGA-3C-AALI-01A-11R-A41B-07	No	4005	BRCA	2.82312
TCGA-3C-AALJ-01A-31R-A41B-07	No	1474	BRCA	5.9528
TCGA-3C-AALK-01A-11R-A41B-07	No	1448	BRCA	4.84279
TCGA-3E-AAAY-01A-11R-A38C-07	Yes	987	PAAD	3.76618
TCGA-3E-AAAZ-01A-11R-A38C-07	Yes	1600	PAAD	4.78249
TCGA-3G-AB0O-01A-22R-A42C-07	No	2086	THYM	1.8102
TCGA-3G-AB0Q-01A-11R-A42C-07	No	1799	THYM	1.96993
TCGA-3G-AB0T-01A-11R-A42C-07	Yes	1786	THYM	3.19661
TCGA-3G-AB14-01A-11R-A42C-07	No	775	THYM	3.27468
TCGA-3G-AB19-01A-21R-A42C-07	Yes	2420	THYM	1.29072
TCGA-3H-AB3K-01A-11R-A40A-07	Yes	841	MESO	2.33974
TCGA-3H-AB3L-01A-11R-A40A-07	Yes	222	MESO	2.3307
TCGA-3H-AB3M-01A-11R-A40A-07	Yes	107	MESO	2.07073
TCGA-3H-AB3O-01A-11R-A40A-07	Yes	627	MESO	0.879392
TCGA-3H-AB3S-01A-21R-A40A-07	Yes	186	MESO	2.12981
TCGA-3H-AB3T-01A-11R-A40A-07	Yes	312	MESO	1.3475
TCGA-3H-AB3U-01A-21R-A40A-07	Yes	108	MESO	1.72303
TCGA-3H-AB3X-01A-11R-A40A-07	No	1490	MESO	1.69086
TCGA-3K-AAZ8-01A-12R-A39D-07	Yes	151	LIHC	1.63575
TCGA-3L-AA1B-01A-11R-A37K-07	No	475	COAD	3.19229
TCGA-3M-AB46-01A-11R-A414-31	No	1765	STAD	3.89303
TCGA-3M-AB47-01A-22R-A414-31	Yes	395	STAD	1.34795
TCGA-3N-A9WB-06A-11R-A38C-07	Yes	426	SKCM	2.28998
TCGA-3N-A9WC-06A-11R-A38C-07	Yes	1705	SKCM	1.46832
TCGA-3N-A9WD-06A-11R-A38C-07	Yes	306	SKCM	2.2522
TCGA-3Q-A9WF-01A-11R-A42C-07	No	467	THYM	1.72875
TCGA-3R-A8YX-01A-11R-A37L-07	Yes	17	SARC	2.15277
TCGA-3S-A8YW-01A-11R-A42C-07	Yes	224	THYM	5.36765
TCGA-3S-AAYX-01A-11R-A42C-07	No	571	THYM	1.9449
TCGA-3T-AA9L-01A-11R-A42C-07	Yes	702	THYM	2.87582
TCGA-3U-A98D-01A-12R-A40A-07	Yes	125	MESO	2.48592
TCGA-3U-A98E-01A-11R-A40A-07	Yes	1257	MESO	0.823831
TCGA-3U-A98F-01A-11R-A40A-07	Yes	365	MESO	3.50196
TCGA-3U-A98G-01A-11R-A40A-07	Yes	497	MESO	1.32843
TCGA-3U-A98H-01A-11R-A40A-07	Yes	798	MESO	1.26267
TCGA-3U-A98I-01A-11R-A40A-07	Yes	404	MESO	1.82725
TCGA-3U-A98J-01A-11R-A40A-07	Yes	741	MESO	2.43795
TCGA-3X-AAV9-01A-72R-A41I-07	Yes	216	CHOL	2.31371
TCGA-3X-AAVA-01A-11R-A41I-07	Yes	264	CHOL	2.53411
TCGA-3X-AAVB-01A-31R-A41I-07	No	402	CHOL	3.84061
TCGA-3X-AAVC-01A-21R-A41I-07	No	709	CHOL	1.488
TCGA-3X-AAVE-01A-11R-A41I-07	No	650	CHOL	0.807272
TCGA-3Z-A93Z-01A-11R-A37O-07	No	385	KIRC	2.58628
TCGA-41-2571-01A-01R-1850-01	Yes	26	GBM	4.22065
TCGA-41-2572-01A-01R-1850-01	Yes	122	GBM	3.23611
TCGA-41-3915-01A-01R-1850-01	Yes	288	GBM	3.10257
TCGA-41-4097-01A-01R-1850-01	Yes	6	GBM	3.1138
TCGA-41-5651-01A-01R-1850-01	Yes	210	GBM	4.33772
TCGA-43-2576-01A-01R-A32Z-07	No	1223	LUSC	3.66651
TCGA-43-2578-01A-01R-0851-07	No	684	LUSC	2.87346
TCGA-43-2581-01A-01R-0851-07	No	1176	LUSC	1.77522
TCGA-43-3394-01A-01R-0980-07	Yes	552	LUSC	3.9884
TCGA-43-3920-01A-01R-0980-07	No	1007	LUSC	3.19488
TCGA-43-5668-01A-01R-1635-07	Yes	470	LUSC	4.8299
TCGA-43-5670-01A-21R-2125-07	No	849	LUSC	3.25152
TCGA-43-6143-01A-11R-1820-07	No	699	LUSC	3.81833
TCGA-43-6647-01A-11R-1820-07	No	757	LUSC	2.61285
TCGA-43-6770-01A-11R-1820-07	No	653	LUSC	3.61696
TCGA-43-6771-01A-11R-1820-07	Yes	154	LUSC	3.953
TCGA-43-6773-01A-41R-1949-07	No	116	LUSC	2.60502
TCGA-43-7656-01A-11R-2125-07	No	596	LUSC	2.84938
TCGA-43-7657-01A-31R-2125-07	No	236	LUSC	5.37791
TCGA-43-7658-01A-11R-2125-07	Yes	2305	LUSC	4.59346
TCGA-43-8115-01A-11R-2247-07	No	407	LUSC	3.29531
TCGA-43-8116-01A-11R-2247-07	No	358	LUSC	1.60431
TCGA-43-8118-01A-11R-2403-07	No	89	LUSC	3.09635
TCGA-43-A474-01A-11R-A24H-07	No	353	LUSC	5.11633
TCGA-43-A475-01A-11R-A24H-07	No	296	LUSC	1.60786
TCGA-43-A56U-01A-11R-A26W-07	No	432	LUSC	3.83117
TCGA-43-A56V-01A-11R-A26W-07	Yes	355	LUSC	4.38723
TCGA-44-2655-01A-01R-0946-07	Yes	1009	LUAD	3.07149
TCGA-44-2656-01A-02R-0946-07	Yes	568	LUAD	2.57529
TCGA-44-2656-01A-02R-A278-07	Yes	568	LUAD	1.80789
TCGA-44-2656-01B-06R-A277-07	Yes	568	LUAD	1.17402
TCGA-44-2657-01A-01R-1107-07	No	1351	LUAD	1.69706
TCGA-44-2659-01A-01R-0946-07	Yes	1146	LUAD	1.9452
TCGA-44-2661-01A-01R-1107-07	No	1159	LUAD	1.47301
TCGA-44-2662-01A-01R-0946-07	Yes	245	LUAD	3.31195
TCGA-44-2662-01A-01R-A278-07	Yes	245	LUAD	1.75886
TCGA-44-2662-01B-02R-A277-07	Yes	245	LUAD	0.95017
TCGA-44-2665-01A-01R-0946-07	No	1301	LUAD	3.06324
TCGA-44-2665-01B-06R-A277-07	No	1301	LUAD	2.12118
TCGA-44-2666-01A-01R-0946-07	Yes	97	LUAD	1.81094
TCGA-44-2666-01A-01R-A278-07	Yes	97	LUAD	0.493955
TCGA-44-2666-01B-02R-A277-07	Yes	97	LUAD	0.851599
TCGA-44-2668-01A-01R-0946-07	Yes	433	LUAD	2.81141
TCGA-44-2668-01A-01R-A278-07	Yes	433	LUAD	1.37762
TCGA-44-2668-01B-02R-A277-07	Yes	433	LUAD	1.62714
TCGA-44-3396-01A-01R-1206-07	No	1130	LUAD	2.00205
TCGA-44-3398-01A-01R-1107-07	No	1163	LUAD	2.22743
TCGA-44-3917-01A-01R-A278-07	No	1183	LUAD	0.417488
TCGA-44-3917-01B-02R-A277-07	No	1183	LUAD	1.18916
TCGA-44-3918-01A-01R-1107-07	Yes	511	LUAD	3.50578
TCGA-44-3918-01A-01R-A278-07	Yes	511	LUAD	2.03238
TCGA-44-3918-01B-02R-A277-07	Yes	511	LUAD	2.02645
TCGA-44-3919-01A-02R-1107-07	Yes	921	LUAD	2.32225
TCGA-44-4112-01A-01R-1107-07	Yes	619	LUAD	4.23977
TCGA-44-4112-01B-06R-A277-07	Yes	619	LUAD	1.82412
TCGA-44-5643-01A-01R-1628-07	No	1013	LUAD	0.928124
TCGA-44-5644-01A-21R-2039-07	No	863	LUAD	2.12499
TCGA-44-5645-01A-01R-1628-07	No	852	LUAD	1.84716
TCGA-44-5645-01A-01R-A278-07	No	852	LUAD	0.723078
TCGA-44-5645-01B-04R-A277-07	No	852	LUAD	0.790939
TCGA-44-6145-01A-11R-1755-07	No	595	LUAD	1.93206
TCGA-44-6146-01A-11R-1755-07	Yes	631	LUAD	2.06115
TCGA-44-6146-01A-11R-A278-07	Yes	631	LUAD	1.26837
TCGA-44-6146-01B-04R-A277-07	Yes	631	LUAD	1.69822
TCGA-44-6147-01A-11R-1755-07	No	845	LUAD	2.95754
TCGA-44-6147-01A-11R-A278-07	No	845	LUAD	1.69786
TCGA-44-6147-01B-06R-A277-07	No	845	LUAD	1.79535
TCGA-44-6148-01A-11R-1755-07	No	704	LUAD	1.22287
TCGA-44-6774-01A-21R-1858-07	No	658	LUAD	1.79327
TCGA-44-6775-01A-11R-1858-07	Yes	684	LUAD	2.98291
TCGA-44-6775-01A-11R-A278-07	Yes	684	LUAD	1.83208
TCGA-44-6775-01C-02R-A277-07	Yes	684	LUAD	1.55582
TCGA-44-6776-01A-11R-1858-07	No	2616	LUAD	2.97741
TCGA-44-6777-01A-11R-1858-07	No	987	LUAD	2.87735
TCGA-44-6778-01A-11R-1858-07	No	1864	LUAD	2.30247
TCGA-44-6779-01A-11R-1858-07	Yes	232	LUAD	2.94759
TCGA-44-7659-01A-11R-2066-07	No	691	LUAD	1.39769
TCGA-44-7660-01A-11R-2066-07	Yes	253	LUAD	3.4642
TCGA-44-7661-01A-11R-2066-07	Yes	335	LUAD	2.37011
TCGA-44-7662-01A-11R-2066-07	No	218	LUAD	3.97288
TCGA-44-7667-01A-31R-2066-07	No	1097	LUAD	2.12463
TCGA-44-7669-01A-21R-2066-07	Yes	390	LUAD	1.04614
TCGA-44-7670-01A-11R-2066-07	No	882	LUAD	4.9717
TCGA-44-7671-01A-11R-2066-07	Yes	883	LUAD	2.72179
TCGA-44-7672-01A-11R-2066-07	No	719	LUAD	1.96181
TCGA-44-8117-01A-11R-2241-07	No	385	LUAD	4.88463
TCGA-44-8119-01A-11R-2241-07	No	285	LUAD	2.8507
TCGA-44-8120-01A-11R-2241-07	No	260	LUAD	2.46772
TCGA-44-A479-01A-31R-A24H-07	Yes	437	LUAD	1.82102
TCGA-44-A47A-01A-21R-A24H-07	Yes	397	LUAD	2.75585
TCGA-44-A47B-01A-11R-A24H-07	No	287	LUAD	2.09031
TCGA-44-A47G-01A-21R-A24H-07	No	351	LUAD	2.16864
TCGA-44-A4SS-01A-11R-A24X-07	No	415	LUAD	1.42229
TCGA-44-A4SU-01A-11R-A24X-07	Yes	260	LUAD	2.67102
TCGA-46-3765-01A-01R-0980-07	No	405	LUSC	4.06863
TCGA-46-3766-01A-01R-0980-07	No	370	LUSC	2.20417
TCGA-46-3767-01A-01R-0980-07	No	396	LUSC	3.41695
TCGA-46-3768-01A-01R-0980-07	No	299	LUSC	2.37912
TCGA-46-3769-01A-01R-0980-07	No	135	LUSC	1.7427
TCGA-46-6025-01A-11R-1820-07	No	324	LUSC	3.16784
TCGA-46-6026-01A-11R-1820-07	No	423	LUSC	4.61253
TCGA-49-4486-01A-01R-1206-07	Yes	2045	LUAD	2.4889
TCGA-49-4487-01A-21R-1858-07	Yes	697	LUAD	3.57881
TCGA-49-4488-01A-01R-1755-07	Yes	634	LUAD	3.79606
TCGA-49-4490-01A-21R-1858-07	Yes	385	LUAD	4.47134
TCGA-49-4494-01A-01R-1206-07	Yes	1081	LUAD	2.93981
TCGA-49-4501-01A-01R-1206-07	Yes	545	LUAD	2.7772
TCGA-49-4505-01A-01R-1206-07	Yes	417	LUAD	3.03497
TCGA-49-4506-01A-01R-1206-07	Yes	692	LUAD	3.16044
TCGA-49-4507-01A-01R-1206-07	Yes	158	LUAD	3.29691
TCGA-49-4510-01A-01R-1206-07	Yes	502	LUAD	3.25426
TCGA-49-4512-01A-21R-1858-07	Yes	905	LUAD	3.95916
TCGA-49-4514-01A-21R-1858-07	No	1700	LUAD	2.26478
TCGA-49-6742-01A-11R-1858-07	Yes	214	LUAD	4.48421
TCGA-49-6743-01A-11R-1858-07	No	1621	LUAD	3.157
TCGA-49-6744-01A-11R-1858-07	No	1683	LUAD	3.10816
TCGA-49-6745-01A-11R-1858-07	No	522	LUAD	1.3111
TCGA-49-6761-01A-31R-1949-07	No	354	LUAD	3.00635
TCGA-49-6767-01A-11R-1858-07	No	677	LUAD	2.65141
TCGA-49-AAQV-01A-11R-A39D-07	Yes	509	LUAD	3.72677
TCGA-49-AAR0-01A-21R-A39D-07	No	4765	LUAD	2.03094
TCGA-49-AAR2-01A-11R-A39D-07	No	2224	LUAD	3.69393
TCGA-49-AAR3-01A-11R-A41B-07	Yes	1893	LUAD	1.28434
TCGA-49-AAR4-01A-12R-A41B-07	Yes	879	LUAD	1.50503
TCGA-49-AAR9-01A-21R-A41B-07	Yes	260	LUAD	3.82843
TCGA-49-AARE-01A-11R-A41B-07	Yes	388	LUAD	2.92408
TCGA-49-AARN-01A-21R-A41B-07	No	1135	LUAD	4.21905
TCGA-49-AARO-01A-12R-A41B-07	Yes	1144	LUAD	2.93755
TCGA-49-AARQ-01A-11R-A41B-07	No	6732	LUAD	2.9715
TCGA-49-AARR-01A-11R-A41B-07	Yes	1099	LUAD	1.14359
TCGA-4A-A93W-01A-11R-A37K-07	No	4	KIRP	2.25749
TCGA-4A-A93X-01A-11R-A37K-07	No	390	KIRP	0.814099
TCGA-4A-A93Y-01A-11R-A37K-07	No	352	KIRP	0.949722
TCGA-4B-A93V-01A-11R-A39D-07	Yes	251	LUAD	3.51272
TCGA-4C-A93U-01A-11R-A39I-07	No	129	THCA	1.62134
TCGA-4E-A92E-01A-11R-A37O-07	No	13	UCEC	3.13042
TCGA-4G-AAZO-01A-12R-A41I-07	Yes	424	CHOL	2.04548
TCGA-4G-AAZT-01A-11R-A41I-07	No	420	CHOL	2.07868
TCGA-4H-AAAK-01A-12R-A41B-07	No	348	BRCA	3.41037
TCGA-4J-AA1J-01A-21R-A38B-07	No	542	CESC	5.12799
TCGA-4K-AA1G-01A-11R-A430-07	No	436	TGCT	3.75593
TCGA-4K-AA1H-01A-11R-A430-07	No	518	TGCT	3.05787
TCGA-4K-AA1I-01A-11R-A430-07	No	3	TGCT	3.53116
TCGA-4K-AAAL-01A-11R-A430-07	Yes	147	TGCT	3.8139
TCGA-4L-AA1F-01A-11R-A41O-07	No	350	PRAD	3.02144
TCGA-4N-A93T-01A-11R-A37K-07	No	146	COAD	6.17269
TCGA-4P-AA8J-01A-11R-A39I-07	No	102	HNSC	3.1159
TCGA-4R-AA8I-01A-11R-A38B-07	Yes	158	LIHC	0.771379
TCGA-4T-AA8H-01A-11R-A41B-07	No	385	COAD	4.84568
TCGA-4V-A9QI-01A-11R-A42C-07	No	2936	THYM	2.93242
TCGA-4V-A9QJ-01A-11R-A42C-07	Yes	793	THYM	2.46043
TCGA-4V-A9QL-01A-11R-A42C-07	No	1908	THYM	2.69931
TCGA-4V-A9QM-01A-11R-A42C-07	No	1253	THYM	2.65526
TCGA-4V-A9QN-01A-11R-A42C-07	Yes	937	THYM	7.63124
TCGA-4V-A9QR-01A-11R-A42C-07	No	780	THYM	2.85798
TCGA-4V-A9QS-01A-11R-A42C-07	Yes	752	THYM	2.2394
TCGA-4V-A9QT-01A-11R-A42C-07	No	813	THYM	1.75583
TCGA-4V-A9QU-01A-11R-A42C-07	No	627	THYM	2.792
TCGA-4V-A9QW-01A-11R-A42C-07	No	630	THYM	2.48305
TCGA-4V-A9QX-01A-11R-A42C-07	No	434	THYM	2.43528
TCGA-4X-A9F9-01A-11R-A42C-07	No	669	THYM	2.43576
TCGA-4X-A9FA-01A-11R-A42C-07	No	392	THYM	1.72992
TCGA-4X-A9FB-01A-11R-A42C-07	No	717	THYM	1.49846
TCGA-4X-A9FC-01A-11R-A42C-07	No	2072	THYM	2.60117
TCGA-4X-A9FD-01A-11R-A42C-07	No	1503	THYM	5.15531
TCGA-4Z-AA7M-01A-11R-A39I-07	No	495	BLCA	2.53042
TCGA-4Z-AA7N-01A-11R-A39I-07	No	1367	BLCA	2.56145
TCGA-4Z-AA7O-01A-31R-A39I-07	No	512	BLCA	3.51855
TCGA-4Z-AA7Q-01A-11R-A39I-07	No	510	BLCA	1.66948
TCGA-4Z-AA7R-01A-11R-A39I-07	Yes	353	BLCA	2.67066
TCGA-4Z-AA7S-01A-11R-A39I-07	No	1064	BLCA	3.90306
TCGA-4Z-AA7W-01A-11R-A39I-07	Yes	760	BLCA	2.35361
TCGA-4Z-AA7Y-01A-11R-A39I-07	No	1522	BLCA	3.11615
TCGA-4Z-AA80-01A-11R-A39I-07	No	19	BLCA	3.45449
TCGA-4Z-AA81-01A-11R-A39I-07	No	1270	BLCA	2.54582
TCGA-4Z-AA82-01A-11R-A39I-07	Yes	1150	BLCA	1.62635
TCGA-4Z-AA83-01A-11R-A39I-07	No	2024	BLCA	2.35716
TCGA-4Z-AA84-01A-11R-A39I-07	No	460	BLCA	3.31796
TCGA-4Z-AA86-01A-11R-A39I-07	Yes	136	BLCA	2.76929
TCGA-4Z-AA87-01A-11R-A39I-07	Yes	221	BLCA	2.38018
TCGA-4Z-AA89-01A-11R-A39I-07	Yes	648	BLCA	2.66332
TCGA-50-5044-01A-21R-1858-07	Yes	483	LUAD	2.05384
TCGA-50-5045-01A-01R-1628-07	Yes	1433	LUAD	2.51003
TCGA-50-5049-01A-01R-1628-07	Yes	1568	LUAD	1.55503
TCGA-50-5051-01A-21R-1858-07	Yes	184	LUAD	2.53822
TCGA-50-5055-01A-01R-1628-07	Yes	771	LUAD	1.95513
TCGA-50-5066-01A-01R-1628-07	Yes	477	LUAD	2.13333
TCGA-50-5066-02A-11R-2090-07	Yes	477	LUAD	3.16545
TCGA-50-5068-01A-01R-1628-07	Yes	686	LUAD	2.59917
TCGA-50-5072-01A-21R-1858-07	Yes	213	LUAD	3.21017
TCGA-50-5930-01A-11R-1755-07	Yes	177	LUAD	4.49348
TCGA-50-5931-01A-11R-1755-07	Yes	425	LUAD	3.16832
TCGA-50-5932-01A-11R-1755-07	Yes	1090	LUAD	2.81256
TCGA-50-5933-01A-11R-1755-07	No	2393	LUAD	2.80976
TCGA-50-5935-01A-11R-1755-07	No	653	LUAD	3.84844
TCGA-50-5936-01A-11R-1628-07	Yes	150	LUAD	3.0204
TCGA-50-5939-01A-11R-1628-07	No	460	LUAD	2.30722
TCGA-50-5941-01A-11R-1755-07	No	1474	LUAD	4.19675
TCGA-50-5942-01A-21R-1755-07	Yes	1378	LUAD	1.25332
TCGA-50-5944-01A-11R-1755-07	No	1750	LUAD	1.78388
TCGA-50-5946-01A-11R-1755-07	Yes	221	LUAD	3.94854
TCGA-50-5946-02A-11R-2090-07	Yes	221	LUAD	3.27163
TCGA-50-6590-01A-12R-1858-07	No	1288	LUAD	1.26081
TCGA-50-6591-01A-11R-1755-07	Yes	119	LUAD	3.01584
TCGA-50-6592-01A-11R-1755-07	Yes	777	LUAD	2.67751
TCGA-50-6593-01A-11R-1755-07	Yes	266	LUAD	2.82463
TCGA-50-6594-01A-11R-1755-07	Yes	285	LUAD	2.7371
TCGA-50-6595-01A-12R-1858-07	Yes	182	LUAD	2.28072
TCGA-50-6597-01A-11R-1858-07	No	1268	LUAD	3.85966
TCGA-50-6673-01A-11R-1949-07	No	22	LUAD	2.68661
TCGA-50-7109-01A-11R-2039-07	Yes	15	LUAD	2.06795
TCGA-50-8457-01A-11R-2326-07	No	1125	LUAD	1.84008
TCGA-50-8459-01A-11R-2326-07	Yes	432	LUAD	3.16528
TCGA-50-8460-01A-11R-2326-07	No	829	LUAD	2.86279
TCGA-51-4079-01A-01R-1100-07	No	12	LUSC	3.99411
TCGA-51-4080-01A-01R-1100-07	No	12	LUSC	2.48011
TCGA-51-4081-01A-01R-1100-07	No	911	LUSC	3.63502
TCGA-51-6867-01A-11R-2045-07	Yes	788	LUSC	3.50916
TCGA-52-7622-01A-11R-2125-07	No	862	LUSC	2.84685
TCGA-52-7809-01A-21R-2125-07	Yes	166	LUSC	4.15541
TCGA-52-7810-01A-11R-2125-07	No	923	LUSC	4.41491
TCGA-52-7811-01A-11R-2125-07	Yes	153	LUSC	3.94921
TCGA-52-7812-01A-11R-2125-07	Yes	791	LUSC	2.53142
TCGA-53-7624-01A-11R-2066-07	Yes	400	LUAD	2.78921
TCGA-53-7626-01A-12R-2066-07	Yes	865	LUAD	1.39171
TCGA-53-7813-01A-11R-2170-07	No	424	LUAD	2.26315
TCGA-53-A4EZ-01A-12R-A24X-07	No	1071	LUAD	2.73407
TCGA-55-1592-01A-01R-0946-07	Yes	452	LUAD	4.72918
TCGA-55-1594-01A-01R-0946-07	No	1178	LUAD	1.9318
TCGA-55-1595-01A-01R-0946-07	No	1479	LUAD	2.84573
TCGA-55-1596-01A-01R-0946-07	No	2065	LUAD	2.93723
TCGA-55-5899-01A-11R-1628-07	No	930	LUAD	2.61254
TCGA-55-6543-01A-11R-1755-07	No	435	LUAD	2.2643
TCGA-55-6642-01A-11R-1858-07	No	2449	LUAD	2.31887
TCGA-55-6712-01A-11R-1858-07	Yes	171	LUAD	2.30638
TCGA-55-6968-01A-11R-1949-07	Yes	1293	LUAD	2.04019
TCGA-55-6969-01A-11R-1949-07	No	1239	LUAD	2.57628
TCGA-55-6970-01A-11R-1949-07	Yes	457	LUAD	3.39057
TCGA-55-6971-01A-11R-1949-07	No	1400	LUAD	1.97453
TCGA-55-6972-01A-11R-1949-07	No	1632	LUAD	2.529
TCGA-55-6975-01A-11R-1949-07	Yes	118	LUAD	3.86652
TCGA-55-6978-01A-11R-1949-07	Yes	42	LUAD	1.47856
TCGA-55-6979-01A-11R-1949-07	Yes	195	LUAD	2.4225
TCGA-55-6980-01A-11R-1949-07	No	2109	LUAD	2.59316
TCGA-55-6981-01A-11R-1949-07	No	1379	LUAD	2.20423
TCGA-55-6982-01A-11R-1949-07	Yes	183	LUAD	2.06416
TCGA-55-6983-01A-11R-1949-07	No	2823	LUAD	2.18485
TCGA-55-6984-01A-11R-1949-07	Yes	724	LUAD	4.40725
TCGA-55-6985-01A-11R-1949-07	No	1233	LUAD	3.11779
TCGA-55-6986-01A-11R-1949-07	No	3261	LUAD	1.48743
TCGA-55-6987-01A-11R-1949-07	No	2137	LUAD	3.11298
TCGA-55-7227-01A-11R-2039-07	Yes	255	LUAD	2.35267
TCGA-55-7281-01A-11R-2039-07	Yes	339	LUAD	3.15476
TCGA-55-7283-01A-11R-2039-07	No	609	LUAD	2.3382
TCGA-55-7284-01B-11R-2241-07	Yes	231	LUAD	2.53386
TCGA-55-7570-01A-11R-2039-07	No	824	LUAD	3.37266
TCGA-55-7573-01A-11R-2039-07	No	487	LUAD	2.58084
TCGA-55-7574-01A-11R-2039-07	Yes	478	LUAD	2.20417
TCGA-55-7576-01A-11R-2066-07	No	670	LUAD	3.04782
TCGA-55-7724-01A-11R-2170-07	No	705	LUAD	4.08916
TCGA-55-7725-01A-11R-2170-07	No	442	LUAD	1.76375
TCGA-55-7726-01A-11R-2170-07	No	652	LUAD	2.52115
TCGA-55-7727-01A-11R-2170-07	No	119	LUAD	3.31742
TCGA-55-7728-01A-11R-2187-07	No	704	LUAD	2.06953
TCGA-55-7815-01A-11R-2170-07	Yes	466	LUAD	2.86509
TCGA-55-7816-01A-11R-2170-07	Yes	468	LUAD	1.56793
TCGA-55-7903-01A-11R-2170-07	No	567	LUAD	4.24387
TCGA-55-7907-01A-11R-2170-07	Yes	294	LUAD	2.45909
TCGA-55-7910-01A-11R-2170-07	Yes	1018	LUAD	3.17441
TCGA-55-7911-01A-11R-2170-07	Yes	515	LUAD	1.55351
TCGA-55-7913-01B-11R-2241-07	Yes	480	LUAD	4.21774
TCGA-55-7914-01A-11R-2170-07	Yes	187	LUAD	2.07731
TCGA-55-7994-01A-11R-2187-07	No	603	LUAD	3.23449
TCGA-55-7995-01A-11R-2187-07	Yes	468	LUAD	3.15462
TCGA-55-8085-01A-11R-2241-07	No	904	LUAD	4.40406
TCGA-55-8087-01A-11R-2241-07	No	462	LUAD	2.4729
TCGA-55-8089-01A-11R-2241-07	No	702	LUAD	1.79523
TCGA-55-8090-01A-11R-2241-07	Yes	548	LUAD	2.38855
TCGA-55-8091-01A-11R-2241-07	No	600	LUAD	2.64386
TCGA-55-8092-01A-11R-2241-07	Yes	127	LUAD	3.52093
TCGA-55-8094-01A-11R-2241-07	No	541	LUAD	2.86979
TCGA-55-8096-01A-11R-2241-07	Yes	566	LUAD	2.82607
TCGA-55-8097-01A-11R-2241-07	No	476	LUAD	1.66143
TCGA-55-8203-01A-11R-2241-07	No	547	LUAD	2.78559
TCGA-55-8204-01A-11R-2241-07	No	515	LUAD	2.24604
TCGA-55-8205-01A-11R-2241-07	Yes	495	LUAD	1.28534
TCGA-55-8206-01A-11R-2241-07	No	888	LUAD	1.69546
TCGA-55-8207-01A-11R-2241-07	No	977	LUAD	1.91142
TCGA-55-8208-01A-11R-2241-07	Yes	511	LUAD	1.97166
TCGA-55-8299-01A-11R-2287-07	Yes	274	LUAD	2.10668
TCGA-55-8301-01A-11R-2287-07	Yes	238	LUAD	3.67024
TCGA-55-8302-01A-11R-2326-07	No	478	LUAD	2.3958
TCGA-55-8505-01A-11R-2403-07	No	440	LUAD	4.77482
TCGA-55-8506-01A-11R-2403-07	No	11	LUAD	6.00591
TCGA-55-8507-01A-11R-2403-07	No	418	LUAD	4.2286
TCGA-55-8508-01A-11R-2403-07	No	617	LUAD	1.56418
TCGA-55-8510-01A-11R-2403-07	No	539	LUAD	2.60542
TCGA-55-8511-01A-11R-2403-07	Yes	460	LUAD	2.75119
TCGA-55-8512-01A-11R-2403-07	Yes	607	LUAD	1.67102
TCGA-55-8513-01A-11R-2403-07	Yes	317	LUAD	1.76553
TCGA-55-8514-01A-11R-2403-07	No	520	LUAD	4.78209
TCGA-55-8614-01A-11R-2403-07	No	536	LUAD	4.0781
TCGA-55-8615-01A-11R-2403-07	Yes	224	LUAD	1.92281
TCGA-55-8616-01A-11R-2403-07	No	48	LUAD	3.84207
TCGA-55-8619-01A-11R-2403-07	No	416	LUAD	3.17599
TCGA-55-8620-01A-11R-2403-07	Yes	375	LUAD	3.45331
TCGA-55-8621-01A-11R-2403-07	No	515	LUAD	1.55964
TCGA-55-A48X-01A-11R-A24H-07	Yes	615	LUAD	2.28475
TCGA-55-A48Y-01A-11R-A24H-07	No	630	LUAD	2.77463
TCGA-55-A48Z-01A-12R-A24X-07	Yes	536	LUAD	4.07886
TCGA-55-A490-01A-11R-A466-07	No	99	LUAD	3.0621
TCGA-55-A491-01A-11R-A24H-07	No	626	LUAD	3.27981
TCGA-55-A492-01A-11R-A24H-07	No	596	LUAD	3.18164
TCGA-55-A493-01A-11R-A24H-07	No	28	LUAD	1.87927
TCGA-55-A494-01A-11R-A24X-07	No	481	LUAD	2.33136
TCGA-55-A4DF-01A-11R-A24H-07	Yes	515	LUAD	2.90313
TCGA-55-A4DG-01A-11R-A24H-07	No	608	LUAD	2.02963
TCGA-55-A57B-01A-12R-A39D-07	No	546	LUAD	3.23802
TCGA-56-1622-01A-01R-0692-07	Yes	881	LUSC	2.70162
TCGA-56-5897-01A-11R-1635-07	No	378	LUSC	1.9087
TCGA-56-5898-01A-11R-1635-07	No	555	LUSC	4.80742
TCGA-56-6545-01A-11R-1820-07	No	666	LUSC	2.93768
TCGA-56-6546-01A-11R-1820-07	No		LUSC	4.0573
TCGA-56-7221-01A-11R-2045-07	No	608	LUSC	5.35125
TCGA-56-7222-01A-11R-2045-07	Yes	427	LUSC	2.66551
TCGA-56-7223-01A-11R-2045-07	Yes	132	LUSC	5.61085
TCGA-56-7579-01A-11R-2045-07	Yes	149	LUSC	5.65254
TCGA-56-7580-01A-11R-2045-07	No	925	LUSC	4.17371
TCGA-56-7582-01A-11R-2045-07	No	601	LUSC	3.48486
TCGA-56-7730-01A-11R-2125-07	Yes	198	LUSC	4.33002
TCGA-56-7731-01A-11R-2125-07	No	3	LUSC	3.09295
TCGA-56-7822-01A-11R-2125-07	Yes	301	LUSC	3.37783
TCGA-56-7823-01B-11R-2247-07	No	1011	LUSC	3.80485
TCGA-56-8082-01A-11R-2247-07	No	455	LUSC	2.12327
TCGA-56-8083-01A-11R-2247-07	No	150	LUSC	4.77478
TCGA-56-8201-01A-11R-2247-07	Yes	397	LUSC	2.26864
TCGA-56-8304-01A-11R-2326-07	No	106	LUSC	3.3497
TCGA-56-8305-01A-11R-2296-07	No	105	LUSC	4.9456
TCGA-56-8307-01A-11R-2296-07	No	818	LUSC	1.6035
TCGA-56-8308-01A-11R-2296-07	No	517	LUSC	4.93725
TCGA-56-8309-01A-11R-2296-07	No	428	LUSC	2.14192
TCGA-56-8503-01A-11R-2403-07	No	41	LUSC	3.01568
TCGA-56-8504-01A-11R-2403-07	No	510	LUSC	2.23918
TCGA-56-8622-01A-11R-2403-07	No	55	LUSC	6.59322
TCGA-56-8623-01A-11R-A28V-07	Yes	645	LUSC	1.02935
TCGA-56-8624-01A-11R-2403-07	No	420	LUSC	6.69735
TCGA-56-8625-01A-11R-2403-07	Yes	272	LUSC	2.69917
TCGA-56-8626-01A-11R-2403-07	No	302	LUSC	3.0982
TCGA-56-8628-01A-11R-2403-07	No	616	LUSC	3.13532
TCGA-56-8629-01A-11R-2403-07	No	481	LUSC	4.27318
TCGA-56-A49D-01A-11R-A24H-07	No	637	LUSC	4.1874
TCGA-56-A4BW-01A-11R-A24H-07	No	585	LUSC	3.20439
TCGA-56-A4BX-01A-11R-A24H-07	No	405	LUSC	5.03271
TCGA-56-A4BY-01A-11R-A24H-07	Yes	543	LUSC	5.29196
TCGA-56-A4ZJ-01A-11R-A262-07	No	640	LUSC	3.26245
TCGA-56-A4ZK-01A-11R-A262-07	No	570	LUSC	4.73763
TCGA-56-A5DR-01A-11R-A27Q-07	No	4	LUSC	3.83186
TCGA-56-A5DS-01A-11R-A27Q-07	No	8	LUSC	3.40573
TCGA-56-A62T-01A-11R-A405-07	No	440	LUSC	3.81909
TCGA-57-1582-01A-01R-1566-13	Yes	731	OV	3.36704
TCGA-57-1583-01A-01R-1566-13	Yes	346	OV	3.65667
TCGA-57-1584-01A-01R-1566-13	Yes	530	OV	2.82206
TCGA-57-1585-01A-01R-1566-13	Yes	53	OV	3.82662
TCGA-57-1586-01A-02R-1567-13	Yes	259	OV	4.30694
TCGA-57-1993-01A-01R-1568-13	No	763	OV	2.43411
TCGA-57-1994-01A-01R-1568-13	No	761	OV	3.33279
TCGA-58-8386-01A-11R-2296-07	No	1	LUSC	4.02223
TCGA-58-8387-01A-11R-2296-07	No	403	LUSC	2.74306
TCGA-58-8388-01A-11R-2326-07	No	412	LUSC	4.86412
TCGA-58-8390-01A-11R-2326-07	No	911	LUSC	6.10548
TCGA-58-8391-01A-11R-2326-07	Yes	2033	LUSC	4.47493
TCGA-58-8392-01A-11R-2326-07	Yes	96	LUSC	4.45771
TCGA-58-8393-01A-11R-2326-07	No	1058	LUSC	2.8907
TCGA-58-A46J-01A-11R-A24H-07	No	2589	LUSC	3.56407
TCGA-58-A46K-01A-11R-A24H-07	Yes	735	LUSC	2.68598
TCGA-58-A46L-01A-11R-A24H-07	No	1723	LUSC	4.81909
TCGA-58-A46M-01A-11R-A24H-07	No	1072	LUSC	3.75044
TCGA-58-A46N-01A-11R-A24H-07	Yes	630	LUSC	3.8188
TCGA-59-2348-01A-01R-1569-13	No	5481	OV	2.40858
TCGA-59-2350-01A-01R-1569-13	Yes	211	OV	2.25951
TCGA-59-2351-01A-01R-1569-13	Yes	2139	OV	1.88014
TCGA-59-2352-01A-01R-1569-13	Yes	286	OV	2.9052
TCGA-59-2354-01A-01R-1569-13	Yes	462	OV	3.95527
TCGA-59-2355-01A-01R-1569-13	Yes	65	OV	2.72223
TCGA-59-2363-01A-01R-1569-13	No	165	OV	3.03161
TCGA-59-A5PD-01A-11R-A406-31	Yes	145	OV	4.8911
TCGA-5B-A90C-01A-11R-A37O-07	Yes	517	UCEC	4.56498
TCGA-5C-A9VG-01A-11R-A37K-07	No	328	LIHC	1.0695
TCGA-5C-A9VH-01A-11R-A37K-07	No	322	LIHC	1.25852
TCGA-5C-AAPD-01A-21R-A39D-07	No	20	LIHC	2.08325
TCGA-5G-A9ZZ-01A-31R-A42C-07	No	835	THYM	2.60897
TCGA-5K-AAAP-01A-11R-A42C-07	No	1054	THYM	3.21703
TCGA-5L-AAT0-01A-12R-A41B-07	No	1477	BRCA	3.75054
TCGA-5L-AAT1-01A-12R-A41B-07	No	1471	BRCA	3.86271
TCGA-5M-AAT4-01A-11R-A41B-07	Yes	49	COAD	5.621
TCGA-5M-AAT6-01A-11R-A41B-07	Yes	219	COAD	3.6067
TCGA-5M-AATE-01A-11R-A41B-07	Yes	810	COAD	5.09826
TCGA-5N-A9KI-01A-31R-A42T-07	No	76	BLCA	4.60924
TCGA-5N-A9KM-01A-11R-A42T-07	Yes	276	BLCA	2.41695
TCGA-5P-A9JU-01A-11R-A42S-07	No	373	KIRP	2.13659
TCGA-5P-A9JV-01A-12R-A42S-07	No	2043	KIRP	2.43651
TCGA-5P-A9JW-01A-11R-A42S-07	Yes	3228	KIRP	1.36608
TCGA-5P-A9JY-01A-11R-A42S-07	No	1508	KIRP	2.68921
TCGA-5P-A9JZ-01A-11R-A42S-07	No	2744	KIRP	1.48491
TCGA-5P-A9K0-01A-11R-A42S-07	No	677	KIRP	1.30077
TCGA-5P-A9K2-01A-11R-A42S-07	No	2392	KIRP	2.45864
TCGA-5P-A9K3-01A-11R-A42S-07	Yes	17	KIRP	0.853517
TCGA-5P-A9K4-01A-11R-A42S-07	No	2184	KIRP	2.95343
TCGA-5P-A9K6-01A-11R-A42S-07	No	1914	KIRP	1.40174
TCGA-5P-A9K8-01A-11R-A42S-07	No	1309	KIRP	1.22823
TCGA-5P-A9K9-01A-11R-A42S-07	Yes	548	KIRP	1.2664
TCGA-5P-A9KA-01A-11R-A42S-07	No	395	KIRP	1.16401
TCGA-5P-A9KC-01A-11R-A42S-07	No	377	KIRP	1.47649
TCGA-5P-A9KE-01A-11R-A42S-07	No	824	KIRP	1.65067
TCGA-5P-A9KF-01A-11R-A42S-07	Yes	728	KIRP	1.95999
TCGA-5P-A9KH-01A-11R-A42S-07	No	2051	KIRP	0.317304
TCGA-5R-AA1C-01A-11R-A41C-07	No	520	LIHC	1.0706
TCGA-5R-AA1D-01A-11R-A38B-07	No	449	LIHC	2.40302
TCGA-5R-AAAM-01A-12R-A41C-07	No	46	LIHC	1.29125
TCGA-5S-A9Q8-01A-11R-A40A-07	No	313	UCEC	3.59069
TCGA-5T-A9QA-01A-11R-A41B-07	No	303	BRCA	2.48944
TCGA-5U-AB0D-01A-11R-A42C-07	No	714	THYM	6.28326
TCGA-5U-AB0E-01A-11R-A42C-07	No	687	THYM	1.75911
TCGA-5U-AB0F-01A-11R-A42C-07	No	459	THYM	2.33285
TCGA-5V-A9RR-01A-11R-A42C-07	No	827	THYM	3.28438
TCGA-5X-AA5U-01A-11R-A406-31	No	361	OV	3.41926
TCGA-60-2695-01A-01R-0851-07	No	642	LUSC	4.65389
TCGA-60-2696-01A-01R-0851-07	No	109	LUSC	2.84437
TCGA-60-2697-01A-11R-2125-07	Yes	200	LUSC	1.42078
TCGA-60-2698-01A-01R-0851-07	Yes	114	LUSC	3.47673
TCGA-60-2703-01A-11R-2045-07	Yes	1757	LUSC	3.78058
TCGA-60-2704-01A-11R-2045-07	Yes	532	LUSC	1.83224
TCGA-60-2706-01A-01R-0851-07	No	2820	LUSC	4.93786
TCGA-60-2707-01A-01R-0851-07	Yes	579	LUSC	3.80739
TCGA-60-2708-01A-01R-0851-07	No	2447	LUSC	3.54123
TCGA-60-2709-01A-21R-1820-07	No	1505	LUSC	2.34959
TCGA-60-2710-01A-01R-0851-07	No	2024	LUSC	2.77747
TCGA-60-2711-01A-01R-0851-07	No	1260	LUSC	2.56179
TCGA-60-2712-01A-01R-0851-07	No	274	LUSC	1.92919
TCGA-60-2713-01A-01R-0851-07	Yes	1356	LUSC	2.25051
TCGA-60-2714-01A-01R-0851-07	No	1531	LUSC	3.17262
TCGA-60-2715-01A-01R-0851-07	Yes	1075	LUSC	2.95522
TCGA-60-2716-01A-01R-0851-07	No	1475	LUSC	3.36373
TCGA-60-2719-01A-01R-0851-07	No	1297	LUSC	2.46929
TCGA-60-2720-01A-01R-0851-07	No	97	LUSC	3.50587
TCGA-60-2721-01A-01R-0851-07	No	983	LUSC	3.14648
TCGA-60-2722-01A-01R-0851-07	Yes	851	LUSC	5.01256
TCGA-60-2723-01A-01R-0851-07	No	1092	LUSC	2.93719
TCGA-60-2724-01A-01R-0851-07	No	717	LUSC	3.38377
TCGA-60-2725-01A-01R-1201-07	No	816	LUSC	2.10104
TCGA-60-2726-01A-01R-0851-07	No	358	LUSC	3.91853
TCGA-61-1721-01A-01R-1569-13	No	338	OV	2.31985
TCGA-61-1724-01A-01R-1568-13	Yes	637	OV	3.53047
TCGA-61-1725-01A-01R-1567-13	Yes	844	OV	2.77722
TCGA-61-1728-01A-01R-1568-13	Yes	533	OV	3.35238
TCGA-61-1733-01A-01R-1567-13	Yes	175	OV	4.55313
TCGA-61-1736-01B-01R-1568-13	Yes	764	OV	1.62644
TCGA-61-1737-01A-01R-1567-13	No	1364	OV	3.24522
TCGA-61-1738-01A-01R-1567-13	Yes	276	OV	2.95715
TCGA-61-1741-01A-02R-1567-13	Yes	488	OV	3.43253
TCGA-61-1900-01A-01R-1567-13	No	176	OV	5.2605
TCGA-61-1907-01A-01R-1567-13	Yes	743	OV	2.32921
TCGA-61-1910-01A-01R-1567-13	No	1127	OV	3.13549
TCGA-61-1911-01A-01R-1567-13	Yes	844	OV	3.57672
TCGA-61-1914-01A-01R-1567-13	Yes	1674	OV	2.67879
TCGA-61-1918-01A-01R-1568-13	Yes	413	OV	2.77568
TCGA-61-1919-01A-01R-1568-13	Yes	439	OV	2.71411
TCGA-61-1995-01A-01R-1568-13	No	61	OV	1.88866
TCGA-61-1998-01A-01R-1568-13	No	168	OV	2.62483
TCGA-61-2000-01A-01R-1568-13	Yes	339	OV	2.58029
TCGA-61-2002-01A-01R-1568-13	No	547	OV	2.53434
TCGA-61-2003-01A-01R-1568-13	No	122	OV	2.75779
TCGA-61-2008-01A-02R-1568-13	Yes	818	OV	4.42791
TCGA-61-2008-02A-01R-1568-13	Yes	818	OV	3.74949
TCGA-61-2009-01A-01R-1568-13	Yes	101	OV	5.25627
TCGA-61-2012-01A-01R-1568-13	No	932	OV	4.03356
TCGA-61-2088-01A-01R-1568-13	No	145	OV	2.96122
TCGA-61-2092-01A-01R-1568-13	No	1573	OV	3.26069
TCGA-61-2097-01A-02R-1568-13	No	1844	OV	3.23886
TCGA-61-2098-01A-01R-1568-13	No	1993	OV	5.58164
TCGA-61-2101-01A-01R-1568-13	Yes	1688	OV	4.67158
TCGA-61-2102-01A-01R-1568-13	Yes	197	OV	3.94132
TCGA-61-2104-01A-01R-1568-13	Yes	1680	OV	4.01927
TCGA-61-2109-01A-01R-1568-13	Yes	465	OV	2.41832
TCGA-61-2110-01A-01R-1568-13	Yes	213	OV	2.72419
TCGA-61-2111-01A-01R-1568-13	Yes	2205	OV	3.12819
TCGA-61-2113-01A-01R-1568-13	Yes	291	OV	3.55051
TCGA-62-8394-01A-11R-2326-07	No	139	LUAD	3.53284
TCGA-62-8395-01A-11R-2326-07	Yes	395	LUAD	2.16392
TCGA-62-8397-01A-11R-2326-07	No	1289	LUAD	2.15982
TCGA-62-8398-01A-11R-2326-07	No	444	LUAD	2.93074
TCGA-62-8399-01A-21R-2326-07	No	2696	LUAD	3.64349
TCGA-62-8402-01A-11R-2326-07	Yes	772	LUAD	1.87708
TCGA-62-A46O-01A-11R-A24H-07	Yes	943	LUAD	2.01443
TCGA-62-A46P-01A-11R-A24H-07	Yes	267	LUAD	3.16018
TCGA-62-A46R-01A-11R-A24H-07	No	1725	LUAD	2.07881
TCGA-62-A46S-01A-11R-A24H-07	Yes	527	LUAD	1.77497
TCGA-62-A46U-01A-11R-A24H-07	No	2067	LUAD	3.25276
TCGA-62-A46V-01A-11R-A24H-07	No	2199	LUAD	3.08689
TCGA-62-A46Y-01A-11R-A24H-07	Yes	314	LUAD	2.30926
TCGA-62-A470-01A-11R-A24H-07	Yes	539	LUAD	3.17798
TCGA-62-A471-01A-12R-A24H-07	No	1246	LUAD	3.95156
TCGA-62-A472-01A-11R-A24H-07	Yes	290	LUAD	2.78404
TCGA-63-5128-01A-01R-1443-07	Yes		LUSC	4.75907
TCGA-63-5131-01A-01R-1443-07	No		LUSC	4.1209
TCGA-63-6202-01A-11R-1820-07	No	1602	LUSC	2.18688
TCGA-63-7020-01A-11R-1949-07	No	2133	LUSC	3.66405
TCGA-63-7021-01A-11R-1949-07	Yes	1503	LUSC	3.85257
TCGA-63-7022-01A-11R-1949-07	No	2073	LUSC	2.78651
TCGA-63-7023-01A-11R-1949-07	No	1682	LUSC	1.87916
TCGA-63-A5M9-01A-11R-A26W-07	No	0	LUSC	3.28783
TCGA-63-A5MB-01A-11R-A26W-07	No	3123	LUSC	3.13106
TCGA-63-A5MG-01A-12R-A27Q-07	No	2148	LUSC	3.47651
TCGA-63-A5MH-01A-12R-A27Q-07	No	2026	LUSC	4.32276
TCGA-63-A5MI-01A-12R-A27Q-07	No	1784	LUSC	3.09884
TCGA-63-A5MJ-01A-11R-A27Q-07	No	1824	LUSC	3.45713
TCGA-63-A5ML-01A-31R-A27Q-07	No	1386	LUSC	2.24489
TCGA-63-A5MM-01A-11R-A26W-07	Yes	218	LUSC	2.65005
TCGA-63-A5MN-01A-22R-A27Q-07	Yes	320	LUSC	1.25671
TCGA-63-A5MP-01A-11R-A26W-07	Yes	511	LUSC	2.2988
TCGA-63-A5MR-01A-31R-A27Q-07	No	2716	LUSC	3.84189
TCGA-63-A5MS-01A-11R-A26W-07	No	2381	LUSC	3.45087
TCGA-63-A5MT-01A-21R-A26W-07	Yes	427	LUSC	3.49912
TCGA-63-A5MU-01A-11R-A26W-07	Yes	420	LUSC	4.24595
TCGA-63-A5MV-01A-21R-A26W-07	No	1100	LUSC	3.75823
TCGA-63-A5MW-01A-11R-A26W-07	No	1639	LUSC	4.39689
TCGA-63-A5MY-01A-11R-A26W-07	No	1052	LUSC	5.2584
TCGA-64-1676-01A-01R-0946-07	No	1728	LUAD	3.81601
TCGA-64-1677-01A-01R-0946-07	Yes	360	LUAD	2.62028
TCGA-64-1678-01A-01R-0946-07	No	1189	LUAD	2.18631
TCGA-64-1679-01A-21R-2066-07	No	2488	LUAD	3.63004
TCGA-64-1680-01A-02R-0946-07	No	1126	LUAD	2.45146
TCGA-64-1681-01A-11R-2066-07	Yes	439	LUAD	3.4086
TCGA-64-5774-01A-01R-1628-07	Yes	246	LUAD	2.24671
TCGA-64-5775-01A-01R-1628-07	Yes	62	LUAD	2.12088
TCGA-64-5778-01A-01R-1628-07	Yes	962	LUAD	3.49557
TCGA-64-5779-01A-01R-1628-07	Yes	795	LUAD	1.726
TCGA-64-5781-01A-01R-1628-07	Yes	96	LUAD	3.28352
TCGA-64-5815-01A-01R-1628-07	No	866	LUAD	2.75369
TCGA-66-2727-01A-01R-0980-07	No	516	LUSC	2.85627
TCGA-66-2734-01A-01R-0980-07	No	1311	LUSC	2.94948
TCGA-66-2737-01A-01R-0980-07	No	61	LUSC	2.64697
TCGA-66-2742-01A-01R-0980-07	No	641	LUSC	4.14845
TCGA-66-2744-01A-01R-0980-07	No	30	LUSC	2.14215
TCGA-66-2753-01A-01R-0980-07	No	31	LUSC	2.70226
TCGA-66-2754-01A-01R-0980-07	No	61	LUSC	0.903887
TCGA-66-2755-01A-01R-0851-07	No	28	LUSC	3.02576
TCGA-66-2756-01A-01R-0851-07	No	30	LUSC	3.19084
TCGA-66-2757-01A-01R-0851-07	Yes	912	LUSC	5.74315
TCGA-66-2758-01A-02R-0851-07	No	639	LUSC	3.19829
TCGA-66-2759-01A-01R-0851-07	No	762	LUSC	3.27705
TCGA-66-2763-01A-01R-0851-07	No	30	LUSC	2.96752
TCGA-66-2765-01A-01R-0851-07	No	61	LUSC	2.05676
TCGA-66-2766-01A-01R-0851-07	No	31	LUSC	3.41404
TCGA-66-2767-01A-01R-0851-07	No	61	LUSC	2.47129
TCGA-66-2768-01A-01R-0851-07	No	61	LUSC	3.48143
TCGA-66-2769-01A-02R-0851-07	No	215	LUSC	3.09594
TCGA-66-2770-01A-01R-0851-07	No	700	LUSC	2.81009
TCGA-66-2771-01A-01R-0980-07	No	578	LUSC	1.98634
TCGA-66-2773-01A-01R-1201-07	No	92	LUSC	2.28795
TCGA-66-2777-01A-01R-1201-07	No	61	LUSC	3.39898
TCGA-66-2778-01A-02R-0851-07	No	578	LUSC	4.07904
TCGA-66-2780-01A-01R-0851-07	No	366	LUSC	3.62292
TCGA-66-2781-01A-01R-0851-07	No	121	LUSC	2.95381
TCGA-66-2782-01A-01R-0851-07	Yes	304	LUSC	2.78375
TCGA-66-2783-01A-01R-1201-07	No	759	LUSC	3.6464
TCGA-66-2785-01A-01R-0851-07	No	60	LUSC	3.77304
TCGA-66-2786-01A-01R-0851-07	No	790	LUSC	2.88555
TCGA-66-2787-01A-01R-0980-07	No	1217	LUSC	3.14945
TCGA-66-2788-01A-01R-0980-07	No	699	LUSC	3.31259
TCGA-66-2789-01A-01R-0980-07	No	123	LUSC	3.73901
TCGA-66-2790-01A-01R-0980-07	Yes	699	LUSC	3.98534
TCGA-66-2791-01A-01R-0980-07	No	153	LUSC	2.94146
TCGA-66-2792-01A-01R-0980-07	No	913	LUSC	3.71144
TCGA-66-2793-01A-01R-1201-07	No	306	LUSC	3.13675
TCGA-66-2794-01A-01R-1201-07	No	1645	LUSC	2.81338
TCGA-66-2795-01A-02R-0980-07	No	122	LUSC	3.87314
TCGA-66-2800-01A-01R-1201-07	No	1492	LUSC	4.69899
TCGA-67-3770-01A-01R-0946-07	No	610	LUAD	2.88161
TCGA-67-3771-01A-01R-0946-07	No	610	LUAD	4.53159
TCGA-67-3772-01A-01R-0946-07	No	573	LUAD	2.56803
TCGA-67-3773-01A-01R-0946-07	No	427	LUAD	1.4019
TCGA-67-3774-01A-01R-0946-07	No	385	LUAD	2.41275
TCGA-67-4679-01B-01R-1755-07	No	448	LUAD	1.4754
TCGA-67-6215-01A-11R-1755-07	No	174	LUAD	2.93166
TCGA-67-6216-01A-11R-1755-07	No	141	LUAD	1.98087
TCGA-67-6217-01A-11R-1755-07	Yes	296	LUAD	2.96538
TCGA-68-7755-01A-11R-2125-07	No	83	LUSC	3.71116
TCGA-68-7756-01A-11R-2125-07	No	202	LUSC	3.02016
TCGA-68-7757-01B-11R-2296-07	No	211	LUSC	3.62476
TCGA-68-8250-01A-11R-2296-07	No	244	LUSC	2.87265
TCGA-68-8251-01A-11R-2296-07	No	406	LUSC	1.57754
TCGA-68-A59I-01A-11R-A262-07	Yes	159	LUSC	2.81379
TCGA-68-A59J-01A-21R-A26W-07	No	448	LUSC	4.23483
TCGA-69-7760-01A-11R-2170-07	No	202	LUAD	2.39028
TCGA-69-7761-01A-11R-2170-07	No	186	LUAD	1.51733
TCGA-69-7763-01A-11R-2170-07	No	690	LUAD	2.92896
TCGA-69-7764-01A-11R-2170-07	No	414	LUAD	2.66984
TCGA-69-7765-01A-11R-2170-07	No	165	LUAD	3.11263
TCGA-69-7973-01A-11R-2187-07	No	230	LUAD	2.05102
TCGA-69-7974-01A-11R-2187-07	No	184	LUAD	2.80853
TCGA-69-7978-01A-11R-2187-07	No	134	LUAD	2.24592
TCGA-69-7979-01A-11R-2187-07	No	408	LUAD	4.22367
TCGA-69-7980-01A-11R-2187-07	No	411	LUAD	2.21493
TCGA-69-8253-01A-11R-2287-07	No	426	LUAD	3.21182
TCGA-69-8254-01A-11R-2287-07	No	409	LUAD	0.757621
TCGA-69-8255-01A-11R-2287-07	No	129	LUAD	3.08423
TCGA-69-8453-01A-12R-2326-07	Yes	344	LUAD	1.82965
TCGA-69-A59K-01A-11R-A262-07	No	591	LUAD	2.87259
TCGA-6A-AB49-01A-12R-A405-07	No		LUSC	3.97785
TCGA-6D-AA2E-01A-11R-A37O-07	No	362	KIRC	1.03991
TCGA-70-6722-01A-11R-1820-07	Yes	293	LUSC	1.58222
TCGA-70-6723-01A-11R-1820-07	Yes	312	LUSC	4.19983
TCGA-71-6725-01A-11R-1858-07	Yes	164	LUAD	3.32024
TCGA-71-8520-01A-11R-2403-07	Yes	179	LUAD	3.22041
TCGA-73-4658-01A-01R-1755-07	No	1600	LUAD	3.91195
TCGA-73-4659-01A-01R-1206-07	Yes	35	LUAD	1.5675
TCGA-73-4662-01A-01R-1206-07	Yes	21	LUAD	2.89819
TCGA-73-4666-01A-01R-1206-07	No	800	LUAD	2.74065
TCGA-73-4668-01A-01R-1206-07	Yes	236	LUAD	3.1725
TCGA-73-4670-01A-01R-1206-07	No	131	LUAD	4.04453
TCGA-73-4675-01A-01R-1206-07	Yes	361	LUAD	3.54763
TCGA-73-4676-01A-01R-1755-07	Yes	281	LUAD	3.82445
TCGA-73-4677-01A-01R-1206-07	Yes	38	LUAD	2.52361
TCGA-73-7498-01A-12R-2187-07	No	1189	LUAD	3.80009
TCGA-73-7499-01A-11R-2187-07	Yes	1447	LUAD	3.33775
TCGA-73-A9RS-01A-11R-A41B-07	Yes	107	LUAD	2.69633
TCGA-75-5122-01A-01R-1755-07	Yes		LUAD	1.21481
TCGA-75-5125-01A-01R-1755-07	Yes	1752	LUAD	2.56686
TCGA-75-5126-01A-01R-1755-07	No		LUAD	1.70337
TCGA-75-5146-01A-01R-1628-07	Yes	1773	LUAD	2.14323
TCGA-75-5147-01A-01R-1628-07	No	1333	LUAD	2.25051
TCGA-75-6203-01A-11R-1755-07	No		LUAD	1.25278
TCGA-75-6205-01A-11R-1755-07	Yes		LUAD	1.68975
TCGA-75-6206-01A-11R-1755-07	No	2590	LUAD	2.28951
TCGA-75-6207-01A-11R-1755-07	No		LUAD	4.08338
TCGA-75-6211-01A-11R-1755-07	Yes		LUAD	3.23396
TCGA-75-6212-01A-11R-1755-07	Yes	1340	LUAD	2.73348
TCGA-75-6214-01A-41R-1949-07	Yes	419	LUAD	4.18591
TCGA-75-7025-01A-12R-1949-07	Yes	1481	LUAD	2.16816
TCGA-75-7027-01A-11R-1949-07	Yes	2949	LUAD	3.70938
TCGA-75-7030-01A-11R-1949-07	No		LUAD	2.68477
TCGA-75-7031-01A-11R-1949-07	No		LUAD	1.53032
TCGA-76-4925-01A-01R-1850-01	Yes	88	GBM	2.82132
TCGA-76-4926-01B-01R-1850-01	Yes	34	GBM	3.57073
TCGA-76-4927-01A-01R-1850-01	Yes	416	GBM	2.34127
TCGA-76-4928-01B-01R-1850-01	Yes	94	GBM	2.54181
TCGA-76-4929-01A-01R-1850-01	Yes	111	GBM	4.29794
TCGA-76-4931-01A-01R-1850-01	Yes	112	GBM	3.24613
TCGA-76-4932-01A-01R-1850-01	Yes	1458	GBM	4.07634
TCGA-77-6842-01A-11R-1949-07	Yes	201	LUSC	1.61716
TCGA-77-6843-01A-11R-1949-07	No	2224	LUSC	3.64276
TCGA-77-6844-01A-11R-1949-07	Yes	1788	LUSC	2.74541
TCGA-77-6845-01A-11R-1949-07	No	708	LUSC	5.4191
TCGA-77-7138-01A-41R-2045-07	No	340	LUSC	3.53139
TCGA-77-7139-01A-11R-2045-07	No	4261	LUSC	3.84654
TCGA-77-7140-01A-41R-2045-07	Yes	250	LUSC	4.58392
TCGA-77-7141-01A-11R-2045-07	No	15	LUSC	4.54834
TCGA-77-7142-01A-11R-2045-07	No	2227	LUSC	2.61157
TCGA-77-7335-01A-11R-2045-07	No	2133	LUSC	3.09489
TCGA-77-7337-01A-21R-2045-07	No	3253	LUSC	3.54535
TCGA-77-7338-01A-11R-2045-07	No	5	LUSC	4.67368
TCGA-77-7463-01A-11R-2045-07	No	1423	LUSC	4.35012
TCGA-77-7465-01A-11R-2045-07	No	990	LUSC	2.765
TCGA-77-8007-01A-11R-2187-07	Yes	139	LUSC	3.89374
TCGA-77-8008-01A-21R-2187-07	No	2639	LUSC	3.80453
TCGA-77-8009-01A-11R-2187-07	Yes	607	LUSC	3.95315
TCGA-77-8128-01A-11R-2247-07	No	1150	LUSC	5.17338
TCGA-77-8130-01A-11R-2247-07	Yes	4471	LUSC	4.79896
TCGA-77-8131-01A-11R-2247-07	No	383	LUSC	3.61298
TCGA-77-8133-01A-12R-2247-07	No	1640	LUSC	3.53032
TCGA-77-8136-01A-11R-2247-07	Yes	301	LUSC	2.90626
TCGA-77-8138-01A-11R-2247-07	Yes	289	LUSC	2.71035
TCGA-77-8139-01A-11R-2247-07	No	3166	LUSC	3.34547
TCGA-77-8140-01A-11R-2247-07	No	351	LUSC	2.80834
TCGA-77-8143-01A-11R-2247-07	Yes	803	LUSC	3.78872
TCGA-77-8144-01A-11R-2247-07	No	833	LUSC	3.47844
TCGA-77-8145-01A-11R-2247-07	Yes	136	LUSC	4.9331
TCGA-77-8146-01A-11R-2247-07	No	3189	LUSC	2.92909
TCGA-77-8148-01A-11R-2247-07	No	2023	LUSC	4.19531
TCGA-77-8150-01A-11R-2247-07	Yes	1278	LUSC	2.56864
TCGA-77-8153-01A-11R-2403-07	No	1992	LUSC	4.49747
TCGA-77-8154-01A-11R-2247-07	No	1841	LUSC	4.40233
TCGA-77-8156-01A-11R-2247-07	No	1106	LUSC	3.79526
TCGA-77-A5FZ-01A-31R-A27Q-07	No	3838	LUSC	1.00216
TCGA-77-A5G1-01A-11R-A27Q-07	Yes	2197	LUSC	3.2293
TCGA-77-A5G3-01A-31R-A27Q-07	No	4570	LUSC	3.66291
TCGA-77-A5G6-01A-11R-A27Q-07	Yes	392	LUSC	4.52576
TCGA-77-A5G7-01B-11R-A27Q-07	No	180	LUSC	3.06681
TCGA-77-A5G8-01B-11R-A27Q-07	No	1884	LUSC	4.2462
TCGA-77-A5GA-01A-11R-A27Q-07	No	1280	LUSC	3.49695
TCGA-77-A5GB-01B-11R-A27Q-07	Yes	229	LUSC	4.86535
TCGA-77-A5GF-01A-21R-A27Q-07	Yes	722	LUSC	3.37223
TCGA-77-A5GH-01A-11R-A27Q-07	No	1182	LUSC	1.96761
TCGA-78-7143-01A-11R-2039-07	Yes	1500	LUAD	2.74795
TCGA-78-7145-01A-11R-2039-07	Yes	422	LUAD	2.98956
TCGA-78-7146-01A-11R-2039-07	No	173	LUAD	3.40768
TCGA-78-7147-01A-11R-2039-07	Yes	578	LUAD	3.18984
TCGA-78-7148-01A-11R-2039-07	Yes	182	LUAD	2.85565
TCGA-78-7149-01A-11R-2039-07	No	3940	LUAD	3.84617
TCGA-78-7150-01A-21R-2039-07	Yes	139	LUAD	5.58296
TCGA-78-7152-01A-11R-2039-07	Yes	1202	LUAD	2.73338
TCGA-78-7153-01A-11R-2039-07	No	3635	LUAD	1.59378
TCGA-78-7154-01A-11R-2039-07	No	593	LUAD	1.97185
TCGA-78-7155-01A-11R-2039-07	Yes	209	LUAD	3.97045
TCGA-78-7156-01A-11R-2039-07	No	976	LUAD	1.72474
TCGA-78-7158-01A-11R-2039-07	Yes	132	LUAD	2.47257
TCGA-78-7159-01A-11R-2039-07	No	1974	LUAD	2.09545
TCGA-78-7160-01A-11R-2039-07	No	697	LUAD	2.90762
TCGA-78-7161-01A-11R-2039-07	Yes	162	LUAD	2.22379
TCGA-78-7162-01A-21R-2066-07	Yes	2218	LUAD	1.82916
TCGA-78-7163-01A-12R-2066-07	No	7248	LUAD	3.31729
TCGA-78-7166-01A-12R-2066-07	No	258	LUAD	4.79129
TCGA-78-7167-01A-11R-2066-07	Yes	726	LUAD	2.87364
TCGA-78-7220-01A-11R-2039-07	Yes	531	LUAD	1.94931
TCGA-78-7535-01A-11R-2066-07	Yes	809	LUAD	5.83247
TCGA-78-7536-01A-11R-2066-07	Yes	231	LUAD	2.61391
TCGA-78-7537-01A-11R-2066-07	No	1622	LUAD	2.23469
TCGA-78-7539-01A-11R-2066-07	Yes	688	LUAD	3.22746
TCGA-78-7540-01A-11R-2066-07	No	1197	LUAD	2.80197
TCGA-78-7542-01A-21R-2066-07	No	321	LUAD	2.54352
TCGA-78-7633-01A-11R-2066-07	Yes	1450	LUAD	1.70186
TCGA-78-8640-01A-11R-2403-07	No	7062	LUAD	4.22892
TCGA-78-8648-01A-11R-2403-07	Yes	720	LUAD	0.950095
TCGA-78-8655-01A-11R-2403-07	No	2360	LUAD	2.19106
TCGA-78-8660-01A-11R-2403-07	Yes	242	LUAD	2.62099
TCGA-78-8662-01A-11R-2403-07	Yes	3044	LUAD	4.25501
TCGA-79-5596-01A-31R-1949-07	No		LUSC	4.91954
TCGA-80-5607-01A-31R-1949-07	No		LUAD	1.84306
TCGA-80-5608-01A-31R-1949-07	No	2832	LUAD	2.16089
TCGA-80-5611-01A-01R-1628-07	No	2595	LUAD	4.28453
TCGA-83-5908-01A-21R-2287-07	No	824	LUAD	2.42546
TCGA-85-6175-01A-11R-1820-07	Yes	294	LUSC	3.07027
TCGA-85-6560-01A-11R-1820-07	No	1259	LUSC	3.46089
TCGA-85-6561-01A-11R-1820-07	No	1224	LUSC	3.36481
TCGA-85-6798-01A-11R-1949-07	Yes	180	LUSC	5.54557
TCGA-85-7696-01A-11R-2125-07	No	1111	LUSC	4.55897
TCGA-85-7697-01A-11R-2125-07	No	1063	LUSC	4.88102
TCGA-85-7698-01A-11R-2125-07	Yes	650	LUSC	4.16956
TCGA-85-7699-01A-11R-2125-07	Yes	760	LUSC	2.80463
TCGA-85-7710-01A-11R-2125-07	No	42	LUSC	4.03576
TCGA-85-7843-01A-11R-2125-07	No	35	LUSC	3.13491
TCGA-85-7844-01A-11R-2125-07	No	911	LUSC	3.12174
TCGA-85-7950-01A-11R-2187-07	No	576	LUSC	2.11483
TCGA-85-8048-01A-11R-2247-07	No	765	LUSC	2.16726
TCGA-85-8049-01A-11R-2247-07	No	579	LUSC	3.3759
TCGA-85-8052-01A-11R-2247-07	No	734	LUSC	4.14351
TCGA-85-8070-01A-11R-2247-07	No	960	LUSC	4.70889
TCGA-85-8071-01A-11R-2247-07	No	815	LUSC	4.01973
TCGA-85-8072-01A-31R-2247-07	No	932	LUSC	4.17471
TCGA-85-8276-01A-11R-2296-07	Yes	1048	LUSC	3.05443
TCGA-85-8277-01A-11R-2296-07	No	307	LUSC	3.42113
TCGA-85-8287-01A-11R-2296-07	No	23	LUSC	3.6385
TCGA-85-8288-01A-11R-2296-07	No	402	LUSC	3.51367
TCGA-85-8350-01A-11R-2296-07	No	683	LUSC	3.94506
TCGA-85-8351-01A-11R-2296-07	No	510	LUSC	3.66154
TCGA-85-8352-01A-31R-2326-07	Yes	128	LUSC	4.64155
TCGA-85-8353-01A-21R-2296-07	Yes	94	LUSC	3.22423
TCGA-85-8354-01A-31R-2326-07	No	995	LUSC	3.74375
TCGA-85-8355-01A-11R-2296-07	No	61	LUSC	2.38775
TCGA-85-8479-01A-11R-2326-07	No	468	LUSC	6.0778
TCGA-85-8481-01A-11R-2326-07	No	236	LUSC	3.23654
TCGA-85-8580-01A-31R-2403-07	No	1113	LUSC	5.02583
TCGA-85-8582-01A-21R-2403-07	No	1160	LUSC	3.16337
TCGA-85-8584-01A-11R-2403-07	No	383	LUSC	1.92048
TCGA-85-8664-01A-11R-2403-07	Yes	434	LUSC	4.29427
TCGA-85-8666-01A-11R-2403-07	No	687	LUSC	4.33003
TCGA-85-A4CL-01A-41R-A26W-07	No	921	LUSC	4.46081
TCGA-85-A4CN-01A-11R-A24H-07	No	1038	LUSC	4.33282
TCGA-85-A4JB-01A-51R-A262-07	No	942	LUSC	4.7341
TCGA-85-A4JC-01A-11R-A24Z-07	Yes	548	LUSC	4.52218
TCGA-85-A4PA-01A-11R-A24Z-07	No	741	LUSC	1.45454
TCGA-85-A4QQ-01A-41R-A262-07	No	927	LUSC	6.39134
TCGA-85-A4QR-01A-11R-A24Z-07	No	600	LUSC	3.66165
TCGA-85-A50M-01A-21R-A262-07	No	826	LUSC	3.07229
TCGA-85-A50Z-01A-21R-A262-07	Yes	462	LUSC	2.93812
TCGA-85-A510-01A-11R-A26W-07	Yes	363	LUSC	2.17919
TCGA-85-A511-01A-21R-A262-07	Yes	390	LUSC	3.60832
TCGA-85-A512-01A-11R-A26W-07	No	465	LUSC	5.11074
TCGA-85-A513-01A-12R-A26W-07	No	910	LUSC	1.94156
TCGA-85-A53L-01A-21R-A26W-07	No	377	LUSC	4.12377
TCGA-85-A5B5-01A-21R-A26W-07	No	111	LUSC	4.68169
TCGA-86-6562-01A-11R-1755-07	Yes	274	LUAD	3.79001
TCGA-86-6851-01A-11R-1949-07	No	179	LUAD	1.87476
TCGA-86-7701-01A-11R-2170-07	Yes	424	LUAD	1.79019
TCGA-86-7711-01A-11R-2066-07	Yes	1046	LUAD	2.76243
TCGA-86-7713-01A-11R-2066-07	No	1157	LUAD	2.00263
TCGA-86-7714-01A-12R-2170-07	Yes	625	LUAD	2.09734
TCGA-86-7953-01A-11R-2187-07	No	997	LUAD	3.36881
TCGA-86-7954-01A-11R-2187-07	No	605	LUAD	2.39314
TCGA-86-7955-01A-11R-2187-07	Yes	820	LUAD	4.97873
TCGA-86-8054-01A-11R-2241-07	No	1148	LUAD	1.90681
TCGA-86-8055-01A-11R-2241-07	No	124	LUAD	3.33929
TCGA-86-8056-01A-11R-2241-07	No	139	LUAD	2.10202
TCGA-86-8073-01A-11R-2241-07	No	740	LUAD	2.61779
TCGA-86-8074-01A-11R-2241-07	No	24	LUAD	3.62814
TCGA-86-8075-01A-11R-2241-07	Yes	199	LUAD	3.15452
TCGA-86-8076-01A-31R-2241-07	No	993	LUAD	2.79579
TCGA-86-8278-01A-11R-2287-07	Yes	29	LUAD	1.84976
TCGA-86-8279-01A-11R-2287-07	No	949	LUAD	4.6012
TCGA-86-8280-01A-11R-2287-07	No	701	LUAD	3.65887
TCGA-86-8281-01A-11R-2287-07	No	0	LUAD	3.37092
TCGA-86-8358-01A-11R-2326-07	No	653	LUAD	3.18927
TCGA-86-8359-01A-11R-2326-07	No	444	LUAD	2.97657
TCGA-86-8585-01A-11R-2403-07	No	353	LUAD	4.43006
TCGA-86-8668-01A-11R-2403-07	No	423	LUAD	2.58434
TCGA-86-8669-01A-11R-2403-07	Yes	849	LUAD	1.73075
TCGA-86-8671-01A-11R-2403-07	No	839	LUAD	1.79298
TCGA-86-8672-01A-21R-2403-07	No	19	LUAD	2.55326
TCGA-86-8673-01A-11R-2403-07	Yes	636	LUAD	4.63747
TCGA-86-8674-01A-21R-2403-07	Yes	334	LUAD	3.65716
TCGA-86-A456-01A-11R-A24H-07	No	896	LUAD	2.46462
TCGA-86-A4D0-01A-11R-A24H-07	No	116	LUAD	2.36008
TCGA-86-A4JF-01A-11R-A24X-07	Yes	436	LUAD	3.17771
TCGA-86-A4P7-01A-11R-A24X-07	No	415	LUAD	3.1731
TCGA-86-A4P8-01A-11R-A24X-07	No	805	LUAD	1.15543
TCGA-90-6837-01A-11R-1949-07	No	758	LUSC	4.02712
TCGA-90-7766-01A-21R-2125-07	Yes	289	LUSC	1.67297
TCGA-90-7767-01A-11R-2125-07	No	89	LUSC	3.28283
TCGA-90-7769-01A-11R-2125-07	No	358	LUSC	4.08326
TCGA-90-7964-01A-21R-2187-07	No	428	LUSC	3.45864
TCGA-90-A4ED-01A-31R-A24Z-07	No	615	LUSC	6.21627
TCGA-90-A4EE-01A-11R-A24Z-07	No	688	LUSC	2.58907
TCGA-90-A59Q-01A-11R-A26W-07	Yes	274	LUSC	4.31887
TCGA-91-6828-01A-11R-1858-07	No	323	LUAD	1.14666
TCGA-91-6829-01A-21R-1858-07	No	1258	LUAD	2.79029
TCGA-91-6830-01A-11R-1949-07	Yes	18	LUAD	2.84808
TCGA-91-6831-01A-11R-1858-07	No	310	LUAD	2.40286
TCGA-91-6835-01A-11R-1858-07	No	79	LUAD	2.91852
TCGA-91-6836-01A-21R-1858-07	No	417	LUAD	4.91985
TCGA-91-6840-01A-11R-1949-07	No	372	LUAD	2.02176
TCGA-91-6847-01A-11R-1949-07	Yes	772	LUAD	2.63155
TCGA-91-6848-01A-11R-1949-07	No	224	LUAD	1.82965
TCGA-91-6849-01A-11R-1949-07	No	35	LUAD	2.50957
TCGA-91-7771-01A-11R-2170-07	No	492	LUAD	1.88772
TCGA-91-8496-01A-11R-2403-07	No	505	LUAD	2.43683
TCGA-91-8497-01A-11R-2403-07	No	434	LUAD	2.42554
TCGA-91-8499-01A-11R-2403-07	No	36	LUAD	4.39881
TCGA-91-A4BC-01A-11R-A24H-07	No	44	LUAD	2.14176
TCGA-91-A4BD-01A-11R-A24H-07	No	603	LUAD	1.67523
TCGA-92-7340-01A-21R-2045-07	No	82	LUSC	3.10973
TCGA-92-7341-01A-31R-2045-07	No	106	LUSC	4.09728
TCGA-92-8063-01A-11R-2247-07	No	122	LUSC	4.33676
TCGA-92-8064-01A-11R-2247-07	No	160	LUSC	2.78835
TCGA-92-8065-01A-11R-2247-07	No	70	LUSC	4.71903
TCGA-93-7347-01A-11R-2187-07	No	683	LUAD	1.80707
TCGA-93-7348-01A-21R-2039-07	No	531	LUAD	3.16042
TCGA-93-8067-01A-11R-2287-07	No	186	LUAD	2.24568
TCGA-93-A4JN-01A-11R-A24X-07	No	718	LUAD	1.77699
TCGA-93-A4JO-01A-21R-A24X-07	No	33	LUAD	2.41438
TCGA-93-A4JP-01A-11R-A24X-07	Yes	497	LUAD	2.69084
TCGA-93-A4JQ-01A-11R-A24X-07	No	526	LUAD	1.76727
TCGA-94-7033-01A-11R-1949-07	No	640	LUSC	3.70546
TCGA-94-7557-01A-11R-2125-07	No	5	LUSC	3.46129
TCGA-94-7943-01A-11R-2187-07	Yes	556	LUSC	2.24144
TCGA-94-8035-01A-11R-2247-07	No	122	LUSC	4.97845
TCGA-94-8490-01A-11R-2326-07	No	153	LUSC	5.21271
TCGA-94-8491-01A-11R-2326-07	Yes	641	LUSC	3.22985
TCGA-94-A4VJ-01A-11R-A24Z-07	No	430	LUSC	4.28866
TCGA-94-A5I4-01A-11R-A26W-07	Yes	314	LUSC	3.81121
TCGA-94-A5I6-01A-21R-A27Q-07	Yes	481	LUSC	4.30133
TCGA-95-7039-01A-11R-1949-07	Yes	1258	LUAD	2.9324
TCGA-95-7043-01A-11R-1949-07	Yes	503	LUAD	2.30141
TCGA-95-7562-01A-11R-2241-07	No	87	LUAD	4.01787
TCGA-95-7567-01A-11R-2066-07	No	568	LUAD	3.12287
TCGA-95-7944-01A-11R-2187-07	No	377	LUAD	3.05122
TCGA-95-7947-01A-11R-2187-07	No	477	LUAD	2.72731
TCGA-95-7948-01A-11R-2187-07	No	476	LUAD	2.58722
TCGA-95-8039-01A-11R-2241-07	Yes	228	LUAD	1.6469
TCGA-95-8494-01A-11R-2326-07	No	84	LUAD	2.95583
TCGA-95-A4VK-01A-11R-A262-07	Yes	496	LUAD	3.50022
TCGA-95-A4VN-01A-11R-A262-07	No	553	LUAD	2.30973
TCGA-95-A4VP-01A-21R-A262-07	Yes	216	LUAD	2.2725
TCGA-96-7544-01A-11R-2045-07	No	2160	LUSC	2.29045
TCGA-96-7545-01A-21R-2045-07	Yes	1693	LUSC	3.62672
TCGA-96-8169-01A-11R-2296-07	No	557	LUSC	2.75858
TCGA-96-8170-01A-11R-2296-07	No	531	LUSC	3.55556
TCGA-96-A4JK-01A-11R-A24Z-07	No	589	LUSC	3.79899
TCGA-96-A4JL-01A-11R-A24Z-07	No	842	LUSC	2.67385
TCGA-97-7546-01A-11R-2039-07	Yes	1255	LUAD	2.11313
TCGA-97-7547-01A-11R-2039-07	Yes	775	LUAD	1.96536
TCGA-97-7552-01A-11R-2039-07	Yes	798	LUAD	1.08984
TCGA-97-7553-01A-21R-2039-07	No	1870	LUAD	1.62368
TCGA-97-7554-01A-11R-2039-07	No	775	LUAD	2.65037
TCGA-97-7937-01A-11R-2170-07	No	564	LUAD	3.95076
TCGA-97-7938-01A-11R-2170-07	No	18	LUAD	1.04117
TCGA-97-7941-01A-11R-2187-07	No	484	LUAD	3.00592
TCGA-97-8171-01A-11R-2287-07	Yes	441	LUAD	5.41242
TCGA-97-8172-01A-11R-2287-07	No	545	LUAD	1.82448
TCGA-97-8174-01A-11R-2287-07	No	164	LUAD	1.71581
TCGA-97-8175-01A-11R-2287-07	Yes	294	LUAD	3.39233
TCGA-97-8176-01A-11R-2403-07	Yes	39	LUAD	2.18168
TCGA-97-8177-01A-11R-2287-07	No	499	LUAD	3.11992
TCGA-97-8179-01A-11R-2287-07	No	435	LUAD	3.34704
TCGA-97-8547-01A-11R-2403-07	No	657	LUAD	2.48101
TCGA-97-8552-01A-11R-2403-07	No	626	LUAD	1.71211
TCGA-97-A4LX-01A-11R-A24X-07	No	614	LUAD	2.02974
TCGA-97-A4M0-01A-11R-A24X-07	No	652	LUAD	2.10618
TCGA-97-A4M1-01A-11R-A24X-07	No	601	LUAD	2.80554
TCGA-97-A4M2-01A-12R-A24X-07	No	624	LUAD	1.96392
TCGA-97-A4M3-01A-11R-A24X-07	Yes	54	LUAD	2.64476
TCGA-97-A4M5-01A-11R-A24X-07	No	634	LUAD	2.36608
TCGA-97-A4M6-01A-11R-A24X-07	No	568	LUAD	2.97973
TCGA-97-A4M7-01A-11R-A24X-07	No	629	LUAD	1.74627
TCGA-98-7454-01A-11R-2045-07	No	652	LUSC	2.93533
TCGA-98-8020-01A-11R-2247-07	Yes	11	LUSC	3.7411
TCGA-98-8021-01A-11R-2247-07	Yes	918	LUSC	4.04681
TCGA-98-8022-01A-11R-2247-07	No	933	LUSC	3.26143
TCGA-98-8023-01A-11R-2247-07	No	649	LUSC	2.26252
TCGA-98-A538-01A-11R-A262-07	No	826	LUSC	4.30357
TCGA-98-A539-01A-31R-A262-07	Yes	173	LUSC	3.24472
TCGA-98-A53A-01A-11R-A262-07	No	552	LUSC	4.00604
TCGA-98-A53B-01A-11R-A262-07	No	61	LUSC	3.01767
TCGA-98-A53C-01A-11R-A262-07	No	822	LUSC	1.35298
TCGA-98-A53D-01A-32R-A262-07	Yes	413	LUSC	0.811635
TCGA-98-A53H-01A-12R-A262-07	Yes	427	LUSC	2.04914
TCGA-98-A53I-01A-31R-A262-07	No	565	LUSC	2.76009
TCGA-98-A53J-01A-11R-A26W-07	No	630	LUSC	4.05708
TCGA-99-7458-01A-11R-2039-07	No	747	LUAD	2.55694
TCGA-99-8025-01A-11R-2241-07	No	1060	LUAD	4.16462
TCGA-99-8028-01A-11R-2241-07	No	1118	LUAD	1.99993
TCGA-99-8032-01A-11R-2241-07	No	44	LUAD	1.50274
TCGA-99-8033-01A-11R-2241-07	Yes	656	LUAD	4.38209
TCGA-99-AA5R-01A-11R-A39D-07	No	658	LUAD	1.67224
TCGA-A1-A0SB-01A-11R-A144-07	No	259	BRCA	4.9265
TCGA-A1-A0SD-01A-11R-A115-07	No	437	BRCA	3.85033
TCGA-A1-A0SE-01A-11R-A084-07	No	1321	BRCA	3.44545
TCGA-A1-A0SF-01A-11R-A144-07	No	1463	BRCA	4.50463
TCGA-A1-A0SG-01A-11R-A144-07	No	434	BRCA	5.04005
TCGA-A1-A0SH-01A-11R-A084-07	No	1437	BRCA	2.79367
TCGA-A1-A0SI-01A-11R-A144-07	No	635	BRCA	6.54765
TCGA-A1-A0SJ-01A-11R-A084-07	No	416	BRCA	2.50404
TCGA-A1-A0SK-01A-12R-A084-07	Yes	967	BRCA	5.54248
TCGA-A1-A0SN-01A-11R-A144-07	No	1196	BRCA	2.96933
TCGA-A1-A0SO-01A-22R-A084-07	No	852	BRCA	2.31417
TCGA-A1-A0SP-01A-11R-A084-07	No	584	BRCA	3.56976
TCGA-A1-A0SQ-01A-21R-A144-07	No	554	BRCA	2.95062
TCGA-A2-A04N-01A-11R-A115-07	No	4354	BRCA	4.7373
TCGA-A2-A04P-01A-31R-A034-07	Yes	102	BRCA	6.20101
TCGA-A2-A04Q-01A-21R-A034-07	No	2385	BRCA	4.08027
TCGA-A2-A04R-01A-41R-A109-07	No	3709	BRCA	3.28565
TCGA-A2-A04T-01A-21R-A034-07	No	2246	BRCA	5.51774
TCGA-A2-A04U-01A-11R-A115-07	No	2654	BRCA	5.29616
TCGA-A2-A04V-01A-21R-A034-07	Yes	1470	BRCA	2.06557
TCGA-A2-A04W-01A-31R-A115-07	No	3102	BRCA	4.83253
TCGA-A2-A04X-01A-21R-A034-07	No	1686	BRCA	4.46271
TCGA-A2-A04Y-01A-21R-A034-07	No	1099	BRCA	4.74782
TCGA-A2-A0CK-01A-11R-A22K-07	Yes	1364	BRCA	3.0943
TCGA-A2-A0CL-01A-11R-A115-07	No	3015	BRCA	3.24077
TCGA-A2-A0CM-01A-31R-A034-07	Yes	382	BRCA	4.89825
TCGA-A2-A0CO-01A-13R-A22K-07	No	3492	BRCA	2.93834
TCGA-A2-A0CP-01A-11R-A034-07	No	2813	BRCA	4.77816
TCGA-A2-A0CQ-01A-21R-A034-07	No	2695	BRCA	4.4782
TCGA-A2-A0CR-01A-11R-A22K-07	No	3283	BRCA	2.84238
TCGA-A2-A0CS-01A-11R-A115-07	No	2348	BRCA	6.10883
TCGA-A2-A0CT-01A-31R-A056-07	No	2289	BRCA	2.43534
TCGA-A2-A0CU-01A-12R-A034-07	No	158	BRCA	2.41286
TCGA-A2-A0CV-01A-31R-A115-07	No	3011	BRCA	3.41977
TCGA-A2-A0CW-01A-21R-A115-07	No	3283	BRCA	6.1976
TCGA-A2-A0CX-01A-21R-A00Z-07	No	1728	BRCA	6.83407
TCGA-A2-A0CY-01A-12R-A034-07	No	1673	BRCA	4.05089
TCGA-A2-A0CZ-01A-11R-A034-07	No	1616	BRCA	2.25988
TCGA-A2-A0D0-01A-11R-A00Z-07	No	2048	BRCA	3.96377
TCGA-A2-A0D1-01A-11R-A034-07	No	1051	BRCA	4.66778
TCGA-A2-A0D2-01A-21R-A034-07	No	1027	BRCA	2.7773
TCGA-A2-A0D3-01A-11R-A115-07	No	1873	BRCA	6.19003
TCGA-A2-A0D4-01A-11R-A00Z-07	No	767	BRCA	3.17124
TCGA-A2-A0EM-01A-11R-A034-07	No	3094	BRCA	4.72932
TCGA-A2-A0EN-01A-13R-A084-07	No	4088	BRCA	2.22565
TCGA-A2-A0EO-01A-11R-A034-07	No	2442	BRCA	3.63308
TCGA-A2-A0EP-01A-52R-A22U-07	No	3603	BRCA	2.88854
TCGA-A2-A0EQ-01A-11R-A034-07	No	2426	BRCA	4.53783
TCGA-A2-A0ER-01A-21R-A034-07	No	2263	BRCA	1.75924
TCGA-A2-A0ES-01A-11R-A115-07	No	2190	BRCA	3.05655
TCGA-A2-A0ET-01A-31R-A034-07	No	1066	BRCA	2.40237
TCGA-A2-A0EU-01A-22R-A056-07	No	1043	BRCA	3.00621
TCGA-A2-A0EV-01A-11R-A034-07	No	968	BRCA	2.56504
TCGA-A2-A0EW-01A-21R-A115-07	Yes	1353	BRCA	3.07435
TCGA-A2-A0EX-01A-21R-A034-07	No	752	BRCA	3.33255
TCGA-A2-A0EY-01A-11R-A034-07	No	1925	BRCA	6.20041
TCGA-A2-A0ST-01A-12R-A084-07	No	3017	BRCA	2.52311
TCGA-A2-A0SU-01A-11R-A084-07	No	1662	BRCA	3.51733
TCGA-A2-A0SV-01A-11R-A084-07	Yes	825	BRCA	3.36718
TCGA-A2-A0SW-01A-11R-A084-07	Yes	653	BRCA	5.62643
TCGA-A2-A0SX-01A-12R-A084-07	Yes	1239	BRCA	4.2424
TCGA-A2-A0SY-01A-31R-A084-07	No	1347	BRCA	2.39048
TCGA-A2-A0T0-01A-22R-A084-07	No	533	BRCA	5.74998
TCGA-A2-A0T1-01A-21R-A084-07	No	521	BRCA	4.06151
TCGA-A2-A0T2-01A-11R-A084-07	Yes	255	BRCA	5.17659
TCGA-A2-A0T3-01A-21R-A115-07	No	1516	BRCA	2.90722
TCGA-A2-A0T4-01A-31R-A084-07	No	624	BRCA	2.83019
TCGA-A2-A0T5-01A-21R-A084-07	No	531	BRCA	4.67085
TCGA-A2-A0T6-01A-11R-A084-07	No	575	BRCA	2.69466
TCGA-A2-A0T7-01A-21R-A084-07	No	631	BRCA	4.19208
TCGA-A2-A0YC-01A-11R-A109-07	Yes	756	BRCA	4.81486
TCGA-A2-A0YD-01A-11R-A109-07	No	769	BRCA	3.6658
TCGA-A2-A0YE-01A-11R-A109-07	No	554	BRCA	4.65601
TCGA-A2-A0YF-01A-21R-A109-07	No	1535	BRCA	3.6067
TCGA-A2-A0YG-01A-21R-A109-07	No	666	BRCA	6.86891
TCGA-A2-A0YH-01A-11R-A109-07	No	659	BRCA	3.76091
TCGA-A2-A0YI-01A-31R-A10J-07	No	1505	BRCA	2.40847
TCGA-A2-A0YJ-01A-11R-A109-07	Yes	559	BRCA	5.97412
TCGA-A2-A0YK-01A-22R-A109-07	No	588	BRCA	4.82085
TCGA-A2-A0YL-01A-21R-A109-07	No	1474	BRCA	3.58109
TCGA-A2-A0YM-01A-11R-A109-07	No	965	BRCA	2.78858
TCGA-A2-A1FV-01A-11R-A13Q-07	No	714	BRCA	0.993711
TCGA-A2-A1FW-01A-11R-A13Q-07	No	528	BRCA	3.09063
TCGA-A2-A1FX-01A-11R-A13Q-07	No	1847	BRCA	3.10313
TCGA-A2-A1FZ-01A-51R-A14D-07	No	683	BRCA	4.07787
TCGA-A2-A1G0-01A-11R-A13Q-07	No	616	BRCA	4.0055
TCGA-A2-A1G1-01A-21R-A13Q-07	No	584	BRCA	2.03643
TCGA-A2-A1G4-01A-11R-A13Q-07	No	595	BRCA	1.16202
TCGA-A2-A1G6-01A-11R-A13Q-07	No	501	BRCA	2.88848
TCGA-A2-A259-01A-11R-A16F-07	No	1596	BRCA	3.34389
TCGA-A2-A25A-01A-12R-A16F-07	No	3276	BRCA	4.28619
TCGA-A2-A25B-01A-11R-A169-07	Yes	1290	BRCA	2.53099
TCGA-A2-A25C-01A-11R-A169-07	No	523	BRCA	3.587
TCGA-A2-A25D-01A-12R-A16F-07	No	552	BRCA	3.56515
TCGA-A2-A25E-01A-11R-A169-07	Yes	2989	BRCA	3.39276
TCGA-A2-A25F-01A-11R-A169-07	No	322	BRCA	1.56769
TCGA-A2-A3KC-01A-11R-A213-07	No	1102	BRCA	3.36706
TCGA-A2-A3KD-01A-12R-A213-07	No	1206	BRCA	3.01783
TCGA-A2-A3XS-01A-11R-A22U-07	Yes	682	BRCA	5.15687
TCGA-A2-A3XT-01A-11R-A22U-07	No	2770	BRCA	4.34297
TCGA-A2-A3XU-01A-12R-A22U-07	Yes	574	BRCA	7.16455
TCGA-A2-A3XV-01A-21R-A239-07	No	996	BRCA	6.086
TCGA-A2-A3XW-01A-11R-A239-07	No	1712	BRCA	5.88574
TCGA-A2-A3XX-01A-21R-A239-07	No	1439	BRCA	5.98706
TCGA-A2-A3XY-01A-11R-A239-07	Yes	802	BRCA	5.1889
TCGA-A2-A3XZ-01A-42R-A239-07	No	1532	BRCA	2.77587
TCGA-A2-A3Y0-01A-11R-A239-07	No	1546	BRCA	5.18533
TCGA-A2-A4RW-01A-21R-A266-07	No	222	BRCA	3.74965
TCGA-A2-A4RX-01A-11R-A266-07	No	742	BRCA	4.5405
TCGA-A2-A4RY-01A-31R-A266-07	No	648	BRCA	3.56789
TCGA-A2-A4S0-01A-21R-A266-07	No	706	BRCA	2.66501
TCGA-A2-A4S1-01A-21R-A266-07	No	820	BRCA	2.16195
TCGA-A2-A4S2-01A-12R-A266-07	No	643	BRCA	3.33574
TCGA-A2-A4S3-01A-21R-A266-07	No	666	BRCA	4.05339
TCGA-A3-3306-01A-01R-0864-07	No	1120	KIRC	3.80352
TCGA-A3-3307-01A-01R-0864-07	No	1436	KIRC	1.77028
TCGA-A3-3308-01A-02R-1325-07	No	16	KIRC	2.14039
TCGA-A3-3311-01A-02R-1325-07	No	1191	KIRC	1.97332
TCGA-A3-3313-01A-02R-1325-07	No	735	KIRC	0.501719
TCGA-A3-3316-01A-01R-0864-07	No	1493	KIRC	3.05702
TCGA-A3-3317-01A-02R-1325-07	Yes	560	KIRC	1.26766
TCGA-A3-3319-01A-02R-1325-07	No	1130	KIRC	3.09876
TCGA-A3-3320-01A-02R-1325-07	No	1508	KIRC	2.23202
TCGA-A3-3322-01A-02R-1325-07	No	1478	KIRC	2.70604
TCGA-A3-3323-01A-02R-1325-07	No	1106	KIRC	3.41522
TCGA-A3-3324-01A-02R-1325-07	No	1186	KIRC	2.58345
TCGA-A3-3325-01A-01R-0864-07	No	1170	KIRC	1.98463
TCGA-A3-3326-01A-01R-0864-07	No	1137	KIRC	2.43018
TCGA-A3-3328-01A-01R-0864-07	No	1385	KIRC	0.643579
TCGA-A3-3329-01A-01R-0864-07	No	1624	KIRC	2.16919
TCGA-A3-3331-01A-02R-1325-07	No	1485	KIRC	2.09011
TCGA-A3-3335-01A-01R-0864-07	Yes	1098	KIRC	3.75042
TCGA-A3-3343-01A-01R-0864-07	No	945	KIRC	3.46347
TCGA-A3-3346-01A-01R-1766-07	Yes	114	KIRC	3.73485
TCGA-A3-3347-01A-02R-1325-07	Yes	610	KIRC	2.39797
TCGA-A3-3349-01A-01R-1188-07	No	1385	KIRC	2.67324
TCGA-A3-3351-01A-02R-1325-07	No	910	KIRC	2.52457
TCGA-A3-3352-01A-01R-0864-07	No	561	KIRC	2.34803
TCGA-A3-3357-01A-02R-1420-07	No	2688	KIRC	1.70408
TCGA-A3-3358-01A-01R-1541-07	No	1307	KIRC	1.7233
TCGA-A3-3359-01A-01R-0864-07	No	2504	KIRC	1.81172
TCGA-A3-3362-01A-02R-1325-07	No	1559	KIRC	2.34415
TCGA-A3-3363-01A-01R-0864-07	No	319	KIRC	1.47861
TCGA-A3-3365-01A-01R-0864-07	No	873	KIRC	2.1042
TCGA-A3-3367-01A-02R-1420-07	No	2270	KIRC	2.7596
TCGA-A3-3370-01A-02R-1420-07	No	2274	KIRC	2.42903
TCGA-A3-3372-01A-02R-1325-07	No	735	KIRC	2.57367
TCGA-A3-3373-01A-02R-1420-07	No	1621	KIRC	1.25574
TCGA-A3-3374-01A-02R-1325-07	No	1314	KIRC	0.282618
TCGA-A3-3376-01A-02R-1420-07	No	1696	KIRC	2.13953
TCGA-A3-3378-01A-02R-1325-07	No	630	KIRC	2.39454
TCGA-A3-3380-01A-01R-0864-07	No	567	KIRC	2.6352
TCGA-A3-3382-01A-02R-1325-07	Yes	514	KIRC	3.95333
TCGA-A3-3383-01A-02R-1325-07	No	861	KIRC	2.94884
[truncated: 8,345 more rows]
